1 **EpiGraph: an open-source platform to quantify**  
2 **epithelial organization.**

3

4

5 Pablo Vicente-Munuera<sup>1,†</sup>, Pedro Gómez-Gálvez<sup>1,†</sup>, Antonio  
6 Tagua<sup>1</sup>, Marta Letrán<sup>1</sup>, Yanlan Mao<sup>2,3</sup> and Luis M. Escudero<sup>1,\*</sup>.

7

8 1: Departamento de Biología Celular, Universidad de Sevilla and Instituto  
9 de Biomedicina de Sevilla (IBiS), Hospital Universitario Virgen del  
10 Rocío/CSIC/Universidad de Sevilla. 41013 Seville, Spain.

11 2: MRC Laboratory for Molecular Cell Biology, University College London,  
12 Gower Street, London WC1E 6BT, UK.

13 3: College of Information and Control, Nanjing University of Information  
14 Science and Technology, Nanjing, Jiangsu 210044, China

15

16 †: These authors contributed equally to this work.

17 \*: Corresponding author: L.M. Escudero ([lmescudero-ibis@us.es](mailto:lmescudero-ibis@us.es)).

18

## 1 **SUMMARY**

2

3 During development, cells must coordinate their differentiation with their  
4 growth and organization to form complex multicellular structures such as  
5 tissues and organs. Epithelia are packed assemblies of cells that will  
6 originate the different tissues of the organism during embryogenesis. A big  
7 caveat for the analysis of the morphogenetic changes in epithelia is the lack  
8 of simple tools that enable the quantification of cell rearrangements. Here  
9 we present EpiGraph, an image analysis tool that quantifies epithelial  
10 organization. Our method combines computational geometry and graph  
11 theory to measure the degree of order of any packed tissue. EpiGraph goes  
12 beyond the traditional polygon distribution analysis, capturing other  
13 organizational traits that improve the characterization of epithelia. EpiGraph  
14 can objectively compare the rearrangements of epithelial cells during  
15 development and quantify how the global assemble is affected. Importantly,  
16 it has been implemented in the open-access platform FIJI. This makes  
17 EpiGraph very simple to use without any programming skills being required.

18

## 19 **KEYWORDS**

20 Morphogenesis, Epithelial organization, Graph Theory.

21

## 22 **HIGHLIGHTS**

23 Epithelial images can be converted into graphs to quantify their topology.

24 EpiGraph is a new simple method to capture epithelial organization.

25 EpiGraph has been designed as a plugin of FIJI to be accessible to any  
26 biology lab.

27

## 1 INTRODUCTION

2 The development of any multicellular organism is based on coordinated  
3 changes that transform the embryo into the adult individual. During  
4 morphogenesis and growth, patterning, cell divisions and architectural  
5 changes must perfectly fit together for the correct development of the body  
6 plan. Any morphogenetic movement such as migration, extension or  
7 invagination of epithelial cells is coupled with dramatic changes in the  
8 organization of cells (Bertet et al., 2004; Blankenship et al., 2006; Escudero  
9 et al., 2007; Farhadifar et al., 2007; Girdler and Roper, 2014; Lecuit and  
10 Lenne, 2007; Pilot and Lecuit, 2005).

11 The control of cell proliferation and its role in morphogenesis has been  
12 deeply studied and the main signalling pathways that control organ size and  
13 shape have been revealed (Lecuit and Le Goff, 2007; Mao et al., 2013; Yu  
14 and Guan, 2013). In contrast, how tissues modulate their organization  
15 during development is an important question that remains unsolved. The  
16 lack of simple and general methods that can capture and quantify the  
17 arrangement of cells is responsible for this gap in the understanding of  
18 morphogenesis. It is known for almost a hundred years that epithelial  
19 tissues exhibit a degree of order (Lewis, 1928). The analysis of epithelial  
20 organization has been mainly based on the number of neighbours of the  
21 epithelial cells, considering the apical surface of these cells as convex  
22 polygons with the same number of sides as neighbours (Blankenship et al.,  
23 2006; Classen et al., 2005; Escudero et al., 2011; Farhadifar et al., 2007;  
24 Gibson et al., 2006, 2011; Heller et al., 2016; Kram et al., 2010; Lewis,  
25 1928; Mao et al., 2011; Nagpal et al., 2008; Patel et al., 2009; Sanchez-  
26 Gutierrez et al., 2016; Zallen and Zallen, 2004). In previous works we have  
27 investigated several aspects of the organization of packed tissues using  
28 Voronoi tessellations to compare the polygon distributions of natural and  
29 mathematical tessellations (Sanchez-Gutierrez et al., 2016). We have  
30 described that the polygon distribution of natural tessellations is restricted to  
31 a series of frequencies of polygons that match the Voronoi diagrams that  
32 conform the Centroidal Voronoi tessellation (CVT). This is what we call a

1 “CVT path” and was used as a scale to compare the organization of different  
2 packed tissues. However, polygon distribution is not sufficient to completely  
3 characterize tissue organization. Tissues with a clearly different appearance  
4 can present very similar polygon distribution (Sanchez-Gutierrez et al.,  
5 2016).

6 As an alternative approach, we have proposed that Graph Theory could  
7 capture differences in the topology of tissues (Escudero et al., 2011;  
8 Sanchez-Gutierrez et al., 2013; Sánchez-Gutiérrez et al., 2017). This is  
9 based on the idea of converting the epithelium in a network of cell-to-cell  
10 contacts (Escudero et al., 2011). The resulting “epithelial graph” can be  
11 analysed by combining the tools of network theory and multivariable  
12 statistical analysis (Escudero et al., 2011; Kursawe et al., 2016; Sanchez-  
13 Gutierrez et al., 2013; Yamashita and Michiue, 2014). Finding features and  
14 patterns that can describe the graphs is key for very diverse fields including  
15 biology (Benson et al., 2016; Costa et al., 2007; Hayes et al., 2013). A  
16 network can be split up into different subgraphs named graphlets. The  
17 graphlets composition of a network has been used to quantify differences  
18 between complex systems (Hayes et al., 2013; Ho et al., 2010; Kuchaiev et  
19 al., 2011; Pržulj et al., 2004). These measurements are based in on the  
20 comparison of the number of these subgraphs in different networks and  
21 were able to provide an index of distance between them. This feature has  
22 the advantage of integrating in a single value the differences between  
23 diverse networks, simplifying the analyses and allowing multiple  
24 comparisons.

25 In summary, there is a clear need for a method to specifically quantify  
26 organization and aid the interpretation of biophysical and mechanical  
27 aspects of morphogenesis (Blankenship et al., 2006; Canela-Xandri et al.,  
28 2011; Farhadifar et al., 2007; Gibson et al., 2006, 2011; Heisenberg and  
29 Bellaiche, 2013; Heller et al., 2016; Lecuit and Lenne, 2007; Mao et al.,  
30 2013; Sanchez-Gutierrez et al., 2016; Zallen and Zallen, 2004). The  
31 advances in imaging techniques, together with the appearance of powerful  
32 methods for automated image analysis (Heller et al., 2016; Khan et al.,



1 2014; Kursawe et al., 2016) and new simulation resources (Blanchard et al.,  
2 2009; Eournay et al., 2016; Fletcher et al., 2014; Guirao et al., 2015;  
3 Mirams et al., 2013; Tanaka et al., 2015) provide a large amount of source  
4 data that require analysis in terms of organization. Here we present the  
5 open source platform EpiGraph, a new image analysis method that uses  
6 segmented images from real epithelia or simulations to easily quantify and  
7 compare the organization of packed tissues.

## 8 **RESULTS**

### 9 **Graphlet measurements as an approach to capture organization of** 10 **packed tissues.**

11 In previous studies, a set of 29 graphlets has been used to distinguish  
12 between different types of networks (Pržulj et al., 2004) (**Fig. S1**). This  
13 method calculated the Graphlet degree Distribution agreement Distance  
14 (GDD) between two networks (Pržulj, 2007). Epithelial images can be seen  
15 as natural tessellations and converted into networks of cell-to-cell contacts  
16 (Escudero et al., 2011). We have used the “graphlet” approach to capture  
17 the topology of epithelial tissues. Tessellations give rise to “geographic  
18 networks” (Albert and Barabasi, 2002) that only makes sense in a planar  
19 surface. For this reason, when we translated the set of graphlets to cellular  
20 patterns, some of them were redundant (G5 and G27) or not possible (G20,  
21 G22, G25). Therefore, in this study we have used a total of 26 graphlets  
22 corresponding to 29 different cellular motifs that account for the organization  
23 of groups of up to 5 cells (**Fig. 1A, Fig. S1**). Most of the analyses performed  
24 in this work were completed with only 17 motifs (Mo17, **Fig. 1A, mauve**)  
25 since we found that excluding the motifs capturing three, four and more than  
26 seven sided cells, the graphlets comparisons were less dependent on the  
27 polygon distributions of the samples. However, it would be possible to use  
28 other combinations such as all the motifs (Mo29) or cellular motifs that  
29 account for the organization of groups of up to 4 cells (Mo10) (**Fig. 1A**).

30 **Graphlet measurements capture differences that polygon distributions**  
31 **do not.**

1 We tested the power of graphlet-based measurements in quantifying  
2 differences between sets of images with very similar polygon distributions  
3 (**Fig. 1B**). During the third instar larva of *Drosophila* the photoreceptors are  
4 being recruited giving rise to a particular repetitive arrangement of the  
5 presumptive eye cells (Eye, **Fig. 1C**). This arrangement is very different to  
6 the irregular distribution in a Voronoi tessellation where the initial seeds  
7 were placed in a random way (Sanchez-Gutierrez et al., 2016), (Diagram 1,  
8 **Fig. 1C**). We previously showed that it was not possible to discriminate  
9 between the polygon distributions of these two tessellations (Sanchez-  
10 Gutierrez et al., 2016), however we obtained a GDD value of 0.086 when  
11 comparing these two sets of images (Mo17, **Table S1, Fig. S2**). To set a  
12 baseline we compared other images with very similar polygon distribution  
13 that also presented, apparently, an arrangement alike. This was the case for  
14 Diagram 4 of the CVT vs. the *Drosophila* wing imaginal disc in larva (dWL)  
15 and the Diagram 5 of the CVT vs. the *Drosophila* wing imaginal disc in  
16 prepupa (dWP) (**Fig. 1B-C**). Both results were on the same range with a  
17 GDD value of 0.042 for Diagram 4 vs. dWL and 0.049 for Diagram 5 vs.  
18 dWP (**Fig. 1-C**). Similar results were obtained when comparing Diagram 4  
19 vs. Diagram 5 and dWL vs. dWP (**Fig. 1-C**). We interpreted that there was a  
20 baseline in the range of 0.04-0.05 values that correspond to similar cellular  
21 arrangements that cannot be well distinguished using the graphlets  
22 distribution. This contrasted with the Eye vs. Diagram 1 comparison where  
23 the use of graphlets can indeed capture differences beyond the polygon  
24 distribution of the samples. The results obtained using Mo17 and Mo29  
25 were equivalent (**Table S1**).

## 26 **EpiGraph quantitatively compares the organization of multiple sets of** 27 **images.**

28 The GDD had the limitation of comparing only 2 samples each time.  
29 However, one of our objectives was to evaluate different types of images  
30 together. Therefore, we designed EpiGraph, a method that calculates the  
31 GDD of any epithelial tissue with other tessellation that serves as a  
32 reference. As an output we obtained an index of distance for each image

1 with respect to this reference. We used three different references: i) a  
2 tessellation formed by regular hexagons, representing the most ordered way  
3 to pave the space (**Fig. 2A**, GDDH). ii) the network motifs emerging from a  
4 random Voronoi tessellation (**Fig. 2B**, GDDRV). iii) a Voronoi Diagram 5  
5 from the CVT path (**Fig. 2C**, GDDV5) that present a polygon distribution  
6 similar to the one from multiple examples in nature (Gibson et al., 2006;  
7 Sanchez-Gutierrez et al., 2016).

8 To have a scale and facilitate fast comparisons we used the concept of the  
9 CVT path (Sanchez-Gutierrez et al., 2016). We calculated the values for  
10 GDDH, GDDRV and GDDV5 for all the Voronoi diagrams and used this  
11 property to visualize the results and plot the GDDH, GDDRV and GDDV5  
12 with respect to the percentage of hexagons of the corresponding diagram  
13 (**Fig. S3**). The CVT does not progress beyond the 70% of hexagons limiting  
14 the possibilities of analysis. We extended the Voronoi scale spanning a  
15 wider range of polygon distributions. The algorithm that devises the CVT  
16 was modified introducing “noise” in the positioning of the seed that produce  
17 the subsequent diagram. In this way, we obtained a “CVT noise” (CVTn)  
18 whose last diagrams reached 90% of hexagons (**Fig. 2D-G** and  
19 **Experimental Procedures**). We decided to compare GDDH, GDDRV and  
20 GDDV5 values with the percentage of hexagons since it is indicative of the  
21 proportion of the other types of polygons along the CVTn (**Table S2**).  
22 Interestingly, the plot obtained using CVT and CVTn diagrams was an  
23 optimum way to easily visualize these geometric scales as continuous “CVT  
24 path” and “CVTn path”. Therefore, we used this framework to analyse the  
25 values of GDDH, GDDRV and GDDV5 for each diagram in the scale. As  
26 expected, the GDDH values were higher in the initial diagrams and were  
27 progressively decreasing with the increase in the percentage of hexagons of  
28 the Voronoi diagrams (**Fig. 2D**). The opposite happened in the case of the  
29 GDDRV values (**Fig. 2E**). In the plot of percentage of hexagons vs GDDV5,  
30 the CVTn path presented the shape of a walking stick. The GDDV5 values  
31 of Voronoi Diagrams 1, 2, 3, and 4 were decreasing progressively, being the

1 Diagram 5 the closest to the zero value. The values for the rest of the  
2 diagrams were gradually increasing similarly to the case of the GDDRv.

3 We tested the method with epithelial images that have been previously  
4 shown to present polygon distributions that match the “CVT path”: chicken  
5 neural tube (cNT), dWL, dWP and Eye (Sanchez-Gutierrez et al., 2016). We  
6 calculated the GDDH, GDDRv and GDDV5 of these images and compared  
7 them with the CVTn (**Fig. 2D-G**). We found that for cNT, dWL and dWP the  
8 GDDH, GDDRv and GDDV5 values were similar to the CVTn at the same  
9 percentage of hexagons of the polygon distribution. In agreement with our  
10 previous results using the GDD, the Eye images presented a higher GDDRv  
11 and GDDV5 values than the expected for a 30% of hexagons (**Fig. 2E-G**).  
12 Therefore, these data points appeared displaced from the CVTn. This result  
13 suggested that EpiGraph was able to distinguish between different  
14 tessellations with a similar polygon distribution.

### 15 **Quantification of organization in altered tissues and simulations.**

16 We further investigated the possible applications of EpiGraph and  
17 performed a series of experiments aiming to understand what traits of the  
18 tissue organization are being captured and quantified by the graphlet  
19 measurements. First, we used the basis for the formation of the CVT path  
20 but including perturbations in subsets of cells. In a weighted Voronoi  
21 tessellation it is possible to define different distance functions for the  
22 formation of the Voronoi cells. In contrast to the diagrams from the CVT or  
23 CVTn (where all the points of a Voronoi cell are closer to the seed that has  
24 generated it) in the case of a weighted Voronoi tessellation the size of a cell  
25 is going to be proportional to the weight defined for its seed and the  
26 surrounding seeds. The construction of a CVT weighted (CVTw) allowed the  
27 study of the effects in the organization of the appearance of cells with an  
28 increased weight (**Experimental Procedures**). We placed the weighted cell  
29 into a circle in the middle of the tessellation (**Fig. 3A**). Then, we calculated  
30 how the interaction of the positive weighted cells with the surrounding  
31 control cells altered the organization of the tissue for every step (4-80

1 iterations). We plotted the values for the positive weighted cells and the  
2 control neighbour separately, but taking into account the percentage of  
3 hexagons of the whole image (**Experimental Procedures** and **Fig. 3B, C**).  
4 GDDH helped to distinguish the organization traits between both types of  
5 cells. While positive weighted cells were changing as the CVTn diagrams, in  
6 the case of the control neighbours there was an increment of the percentage  
7 of hexagons for the same GDDH value (**Fig. 3B**). The use of GDDRV and  
8 GDDV5 showed clear differences between both types of cells and the CVTn  
9 path (**Fig. 3B** and **Fig. S4**). Altogether, our results suggest that GDDH,  
10 GDDRV and GDDV5 can capture different organizational traits making  
11 EpiGraph flexible to analyse and compare diverse tissues or groups of cells.

12 In a second approach we used images of different vertex model  
13 simulations of proliferating tissues with normal and altered parameters that  
14 change the epithelial organization (Sanchez-Gutierrez et al., 2016),  
15 **Experimental Procedures** and **Fig. 3D-F**). These alterations mimic the  
16 effect of the reduction of myosin II in the *Drosophila* third instar wing disc  
17 epithelium: dMWP (**Fig. 3G**). In the control simulation, cells grow to double  
18 the original area and then divide into two cells. In the case 3 and case 4  
19 simulations there was a random reduction of the tension parameter together  
20 with a requirement of a minimum tension threshold to be able to divide. If the  
21 cells do not reach this threshold they continue to grow, but are not able to  
22 divide the cell body. When this happen, the cells will be stuck in mitotic  
23 phase and will not start a second round of cell division. This was described  
24 to be similar to what happened in the dMWP samples when examining the  
25 polygon distributions (Sanchez-Gutierrez et al., 2016). The control  
26 simulation gave similar values to the CVTn, while case 3, case 4 and dMWP  
27 images presented a clear deviation in the GDDRV plot (**Fig. 3H**) and the  
28 GDDRV vs GDDV5 graph (**Fig. 3I**). Interestingly, these data-points  
29 distributed in the same region of the graph. These differences did not  
30 appear in the GDDH one (**Fig. S4**). These data suggested that GDD  
31 calculation was a useful method to identify differences in organization due to  
32 changes in cell ideal volume.

1 The different results comparing GDDH, GDDRV and GDDV5 values also  
2 suggested that GDDH had better resolution for images with a higher  
3 percentage of hexagons while GDDRV and GDDV5 were more sensitive to  
4 the differences between images with less than 40% of hexagons.

## 5 **EpiGraph: a method to capture epithelial organization implemented in** 6 **FIJI.**

7 Aiming to enhance the accessibility to the biology community for the  
8 analysis of tissue organization we have designed EpiGraph, a plugin for FIJI  
9 (Schindelin et al., 2012). EpiGraph consists in a pipeline of 5 very simple  
10 steps. First, the skeleton of an epithelial image is uploaded and the  
11 individual cells are identified. Second, there is a step where the user selects  
12 the distance threshold to identify two cells as neighbours. Here it is possible  
13 to select different thresholds and to check the number of neighbours of  
14 every cell in each case. Third, a ROI is selected. There are several  
15 possibilities such as a default ROI from the image or the selection of  
16 individual cells. Fourth, the graphlet information for the selected cells is  
17 calculated. These data are used to obtain the GDDH, GDDRV and GDDV5.  
18 These values are incorporated to a table. The fifth step includes the  
19 classification and labelling of different images in order to represent them in a  
20 new window. This final phase allows exporting the representation of the data  
21 in a three-dimensional graph. **Movie S1** shows an example of EpiGraph  
22 usage. A detailed description of EpiGraph can be found in the  
23 **Supplemental Experimental Procedures** section. A full set of tutorials  
24 explaining how to install and use EpiGraph is available at EpiGraph's wiki  
25 (<https://imagej.net/EpiGraph>).

26 As a proof of principle of the usability of EpiGraph we used images  
27 obtained from the literature, not obtained by our group and not directly  
28 related with our work. We chose a tissue where the organization changes  
29 are clear during time: the appearance of rosettes during germ band  
30 extension of the embryonic development of *Drosophila* (Blankenship et al.,  
31 2006). We selected eight representative time points from "Movie S1" of this

1 article and quantified the graphlets content (**Fig. 4A**). After segmentation  
2 (**Experimental Procedures**), the images were uploaded to EpiGraph and  
3 plotted in the 3D graph (**Fig. 4B-C**). We found that the early frames from the  
4 original movie (001, 035, 070) were located close to the CVT. Progressively,  
5 the appearance of rosettes (100, 135) correlated with the separation of  
6 these samples from the CVT. This distance was greater in the case of the  
7 image corresponding with the frame 170. In contrast, the last two frames did  
8 not increase the distance with the CVTn. We observed a reversion in the  
9 measurement of the organization, with the image 235 located very close to  
10 the time point 135. Interestingly, this was captured using different  
11 combinations of the four measured parameters (percentage of hexagons,  
12 GDDH, GDDRV and GDDV5, **Fig. 4B-C**). The ability of compare different  
13 steps of a developmental process suggested that EpiGraph was a versatile  
14 method able to capture and analyse the dynamic changes in organization of  
15 developmental processes.

## 16 **DISCUSSION**

17 Textbook definitions of morphogenesis include the term “organization” as  
18 key to explain this fundamental developmental process (Dai and Gilbert,  
19 1991). The authors wonder, “How can matter organize itself so as to create  
20 a complex structure such as a limb or an eye?” Here we have provided a  
21 tool that can help the developmental biology community to solve that  
22 question.

23 The analysis of the polygon sides of the epithelial cells has been shown to  
24 be insufficient to completely understand tissue organization. Some  
25 tessellations can present very different arrangements and the same  
26 frequencies of number of neighbours. A second problem is the lack of a  
27 simple value as an indicator of epithelial organization. This feature  
28 complicates the analysis of the morphogenesis of normal development and  
29 after genetics alterations. Our previous attempts to go beyond this caveat  
30 were based on multi-statistical analyses of graph features (Sanchez-  
31 Gutierrez et al., 2013) and the creation of a Voronoi scale to statistically



1 compare groups of images with the CVT reference (Sánchez-Gutiérrez et  
2 al., 2016). However, we are aware that these methods are difficult to  
3 incorporate into the average developmental biology lab.

4 We have developed EpiGraph aiming to solve both questions. EpiGraph  
5 transforms the image into a graph of cell-to-cell contacts and extracts their  
6 graphlet content to later compare with other images. These complex  
7 algorithms are hidden behind the friendly user window of FIJI. This is the  
8 most popular open-source biological image analysis platform. In addition,  
9 the output data options of EpiGraph facilitate a fast and clear representation  
10 and interpretation of the results. Therefore, our method can be easily used  
11 in any developmental biology lab.

12 One of the strengths of EpiGraph is the comparison of any tessellation with  
13 the hexagonal lattice, the “random” Voronoi tessellation and the Voronoi  
14 tessellation that presents the “conserved polygon distribution” (Gibson et al.,  
15 2006; Sánchez-Gutiérrez et al., 2016) (**Fig. 2A-C**). We have tested  
16 EpiGraph with different types of samples: as expected, the average of the  
17 natural tessellations such as dWL, dWP and cNT matched the CVTn path  
18 position (**Fig. 2D-G**). We interpret that these three natural samples present  
19 similar polygon distribution and graphlet composition that some Voronoi  
20 Diagrams from the CVTn. This was independent of the combination of GDD  
21 values plotted. On the other hand, the average of the Eye samples  
22 appeared far from the CVTn when GDDV5 or GDDRV values were plotted.  
23 These two GDD were capturing differences in organization between the Eye  
24 and any Voronoi Diagram (including Diagram 1, the one that present a  
25 similar polygon distribution than the Eye). This result supports the utility of  
26 EpiGraph to quantify organizational traits that were not accessible until now.  
27 The same idea is reinforced by the results obtained with the mutant samples  
28 for myosin II (dMWP) and the two vertex simulations that try to reproduce  
29 the same phenomena by increasing the value of the “ideal area” term in  
30 some cells (case III and case IV, **Fig. 3F-G** and **Experimental**  
31 **Procedures**). In a previous work we showed that these three set of samples  
32 slightly deviated the CVT scale in terms of polygon distribution (Sánchez-



1 Gutierrez et al., 2016). Here we show very clear differences in terms of the  
2 values of GDDV5 and GDDRV (**Fig. 3F-G**), suggesting a higher sensitivity of  
3 the new method when capturing differences in organization.

4 Eye or myosin II simulations appear more different when plot GDDV5 and  
5 GDDRV values. But differences between two populations of CVTw cells are  
6 clearer using GDDH (**Fig. 3C-D**). We have found that depending on the  
7 samples some GDD work better than others to find differences. We think  
8 that this is related to the total content of hexagons in the images, being  
9 GDDH more appropriate when it is higher and GDDRV and GDDV5 better  
10 when it is lower. For this reason, we have designed the visualization step of  
11 the program to easily change the three axes and check the different results  
12 using any combination of GDDs and the “percentage of hexagons”.

13 As a proof of principle of the capabilities of our method we have chosen a  
14 previously published movie to analyse the changes of organization during  
15 morphogenesis. We have chosen the emergence and resolution of rosettes  
16 during the germ band extension since it is a well-known event with a  
17 dynamic and complex arrangement of cells (Blankenship et al., 2006). The  
18 selected time lapses included the formation and resolution of the rosettes.  
19 The GDD values of these images correlate with the developmental process  
20 and the 3D visualization tool of EpiGraph captures the complete  
21 morphogenetic event (**Fig. 4B-C**). The selected frames 001, 035 and 070,  
22 appear near the CVTn diagrams since they share a similar composition of  
23 motifs. This starts to change with the appearance and increase of the  
24 rosettes (frames 100, 135 and 170) that progressively separate them from  
25 the CVTn. The rosettes contain motifs that illustrate this developmental  
26 biology process and they are captured by the graphlet analysis. Indeed, the  
27 two last frames (200 and 235) show that this tendency is being reversed,  
28 going back closer to the CVTn. We think that this is reflecting the return to  
29 an epithelial organization without so many motifs formed by groups of cells  
30 contacting in a vertex: the resolution of rosettes that allows tissue  
31 elongation.

## 1 **EpiGraph limitations.**

2 Although EpiGraph accepts a wide range of images as inputs, we have  
3 specified some minimum requirements. It does not accept images bigger  
4 than 3000 pixels of width or 3000 pixels of height, since process them could  
5 be computationally intensive. In addition, EpiGraph only accepts single  
6 images. Stack of images should be adapted to single frames before  
7 uploading it to EpiGraph.

8 Computers with little RAM memory (less than 16gb) will work but with a  
9 series of restrictions. For ensuring the usability, it is not recommended  
10 computing images with a high number of cells (more than 1000) due to a  
11 possible lack of memory. In the same way, we suggest skeletonizing the  
12 edges of the images and using a small radius (lower than 10 pixels) to  
13 calculate the cells neighbourhood. Choosing a high radius value could slow  
14 down the work queue, increasing the use of RAM memory.

15 If any of these requirements are not satisfied, the program alert the user  
16 allowing him/her to change the image provided. Importantly, the images and  
17 the ROIs require a minimum number of cells in order to get coherent  
18 graphlets. Therefore, to get any result, EpiGraph must detect at least a 4'  
19 valid cell in the case of Mo7 or Mo10 or a 5' valid cell in the case of Mo17  
20 and Mo29. In any case, we strongly recommend having a greater number of  
21 4' and 5' valid cells to get results that can be trusted in terms of capturing  
22 the organization of a tissue. Regarding the 3D visualization tool, it allows the  
23 user to see the position of the samples from different angles. However, the  
24 resolution of the exported file is only 72 pixels per inch (dpi). This could be  
25 too low for publications and therefore EpiGraph provides an excel table with  
26 all the information needed to represent it with other programs.

27 In summary, we have generated a very accessible open source method to  
28 produce a quantitative description of epithelial tissue arrangements. We  
29 anticipate that this tool will improve the study of tissue morphogenesis by  
30 incorporating the epithelial organization as result of the effect of mutations or  
31 diseases.

## 1 **EXPERIMENTAL PROCEDURES**

2

### 3 **Source images used in the study.**

4

#### 5 Centroidal Voronoi Tessellation (CVT) diagrams and variations

6 For the generation of this set of paths we have used the software Matlab  
7 R2014b to iteratively apply the Lloyd's algorithm to a random Voronoi  
8 tessellation (Lloyd, 1982). This implies that the centroid of a cell in a Voronoi  
9 diagram is the seed for the same cell in the next iteration.

#### 10 - *Centroidal Voronoi Tessellation (CVT) diagrams*

11 Centroidal Voronoi Tessellation diagrams were obtained as described  
12 previously by our group (Sanchez-Gutierrez et al., 2016). The original 20  
13 original Voronoi diagrams were created placing 500 seed randomly in an  
14 image of 1024x1024 pixels. A total of 700 iterations were generated for each  
15 initial image.

#### 16 - *Centroidal Voronoi Tessellation noise (CVTn) diagrams*

17 We have developed a variation of CVT path, named CVT noise path. We  
18 started from the same 20 initial random diagrams described above. The  
19 development process of CVTn path was modified so the new seeds were  
20 not strictly the centroid regions. In even iterations, we selected a region of 5  
21 pixels of radius from the centroid position where seeds could be placed  
22 randomly. In odd iterations the system was stabilized, applying the original  
23 Lloyd algorithm. A total of 700 iterations were generated for each initial  
24 image.

#### 25 - *Centroidal Voronoi Tessellation weighted (CVTw) path*

26 We computed a variant of the generalized CVT path, in which, a subset of  
27 seeds presented a weight higher than the rest. We used 4 images with a  
28 size of 2048x2048 pixels and with 2000 seeds located randomly over these  
29 images. A total of 80 iterations were performed from the initial seeds. We  
30 applied the same algorithm used for the CVT path generation until the  
31 iteration number 3. After this step, we made use of an external function of  
32 Matlab: *powerDiagramWrapper* (McCollum, 2014). This function took the

1 position of the seeds and their weight and returned the cells edges of the  
2 weighted Voronoi Diagram. In this way, we calculated the centroids position  
3 of the Voronoi cells as seeds and applied the *powerDiagramWrapper*  
4 function for each iteration. So, we have replaced the generation of the  
5 conventional Voronoi diagram as dictate the Lloyd algorithm, by the  
6 weighted Voronoi Diagram generation.

7 From the initial Voronoi diagram, all the cells located in a radius of 300  
8 pixels from the centre point in the image were considered as weighted cells.  
9 The weighted cells were endowed with a weight of 2000, and the rest with a  
10 null weight. This weight ( $w$ ) expressed the capability of the seed ( $p$ ) to  
11 influence its neighbourhood, being then the corresponding cell larger. Thus,  
12 nearby points ( $x$ ) are “closer” to its seed with respect the power of the point:  
13  $pow(x,p) = |x - p|^2 - w(p)$ .

#### 14 Natural packed tissues and vertex model simulations

15 The details of the obtaining and processing of the epithelial images were  
16 described in (Escudero et al., 2011). Control vertex model simulation  
17 includes cell proliferation and is the base for the other two cases. Case III  
18 corresponds to a vertex model simulation with heterogeneous reduction of  
19 line tension and an impairment of the cell division when tension value is  
20 under the 30 percentage of the initial value. Case IV is a similar simulation  
21 than Case III with a threshold of 40 percent. The exact conditions for the  
22 vertex model simulations were described in (Sanchez-Gutierrez et al.,  
23 2016).

#### 24 Multicellular Rosette Formation segmentation

25 We have segmented a set of images taken from a movie that represents  
26 the evolution of the multicellular rosette formation. This is “Movie S1” from  
27 Blankenship and cols., 2006 article (url: [https://ars.els-  
28 cdn.com/content/image/1-s2.0-S153458070600400X-mmc2.mov](https://ars.els-cdn.com/content/image/1-s2.0-S153458070600400X-mmc2.mov))  
29 (Blankenship et al., 2006). We do not show these panels in this version of  
30 the manuscript since we have not been able to obtain the editorial  
31 permission yet. The segmentation procedure consisted in the following

1 steps: 1) We used Trainable Weka Segmentation (Arganda-Carreras et al.,  
2 2017) a plugin developed for FIJI (Yoon et al., 1995). This plugin uses  
3 machine learning to correctly segment images. We trained the program with  
4 a representative image of the whole set, classifying two categories: the  
5 outlines and the body of the cells. After the training step, we applied the  
6 plugin classifier to all the chosen images from the film, getting a first set of  
7 segmented images. 2) Manual curation: This step was necessary to reflect  
8 rigorously the real cell outlines in the segmented images, and discard the  
9 zones with bad visibility or artefacts. The process was carried out by using  
10 Adobe Photoshop CS6. 3) Image processing: We developed a script in  
11 Matlab R2014b to clean the noise and the segmentation imperfections. We  
12 used several morphological operations for this purpose. Finally, we fixed the  
13 cells outlines with a width of 3 pixels to preserve the nature of the image.

#### 14 **Graphlets and motifs selection.**

15 The different images of the previous section were used to create a graph of  
16 cell-to-cell contacts (Escudero et al., 2011) and **Supplemental**  
17 **Experimental Procedures**) that served as the source for the graphlet  
18 analysis (Pržulj, 2007; Pržulj et al., 2004). First, we adapted the graphlet  
19 analysis performed by EpiGraph to the nature of our samples (tessellations).  
20 Three graphlets were discarded since they were not possible in the context  
21 of an epithelial tissue (**Fig. 1** and **Fig. S1**). Second, we used the computer  
22 program for graphlet identification and calculation ORCA (Orbit Counting  
23 Algorithm) (Hocevar and Demsar, 2014), to extract the different  
24 conformations of nodes assembling the graphlets, called orbits (Pržulj,  
25 2007). We computed the Graphlet degree Distribution of the 73 given orbits  
26 from the 29 graphlets, and then we removed the non-used ones.

27

#### 28 **REFERENCES**

29 Albert, R., Barabasi, A.-L., 2002. Statistical mechanics of complex  
30 networks. *Rev. Mod. Phys.* 74, 47–97.  
31 Arganda-Carreras, I., Kaynig, V., Rueden, C., Eliceiri, K.W., Schindelin, J.,  
32 Cardona, A., Seung, H.S., 2017. Trainable Weka Segmentation: a machine  
33 learning tool for microscopy pixel classification. *Bioinformatics*.  
34 doi:10.1093/bioinformatics/btx180

- 1 Benson, A.R., Gleich, D.F., Leskovec, J., 2016. Higher-order organization  
2 of complex networks. *Science* (80- ). 353, 163–166.  
3 doi:10.1126/science.aad9029
- 4 Bertet, C., Sulak, L., Lecuit, T., 2004. Myosin-dependent junction  
5 remodelling controls planar cell intercalation and axis elongation. *Nature*  
6 429, 667–671.
- 7 Blanchard, G.B., Kabla, A.J., Schultz, N.L., Butler, L.C., Sanson, B.,  
8 Gorfinkiel, N., Mahadevan, L., Adams, R.J., 2009. Tissue tectonics:  
9 morphogenetic strain rates, cell shape change and intercalation. *Nat*  
10 *Methods* 6, 458–464. doi:nmeth.1327 [pii]10.1038/nmeth.1327
- 11 Blankenship, J.T., Backovic, S.T., Sanny, J.S., Weitz, O., Zallen, J.A.,  
12 2006. Multicellular rosette formation links planar cell polarity to tissue  
13 morphogenesis. *Dev Cell* 11, 459–470.
- 14 Canela-Xandri, O., Sagués, F., Casademunt, J., Buceta, J., 2011.  
15 Dynamics and mechanical stability of the developing dorsoventral organizer  
16 of the wing imaginal disc. *PLoS Comput. Biol.* 7.  
17 doi:10.1371/journal.pcbi.1002153
- 18 Classen, A.K., Anderson, K.I., Marois, E., Eaton, S., 2005. Hexagonal  
19 packing of *Drosophila* wing epithelial cells by the planar cell polarity  
20 pathway. *Dev Cell* 9, 805–817.
- 21 Costa, L.D.A.F., Rodrigues, F.A., Travieso, G., Boas, P.R. V, 2007.  
22 Characterization of complex networks: a survey of measurements. *Adv.*  
23 *Phys.* 56, 167–242.
- 24 Dai, J.D., Gilbert, L.I., 1991. Metamorphosis of the corpus allatum and  
25 degeneration of the prothoracic glands during the larval-pupal-adult  
26 transformation of *Drosophila melanogaster*: a cytophysiological analysis of  
27 the ring gland. *Dev Biol* 144, 309–326.
- 28 Escudero, L.M., Bischoff, M., Freeman, M., 2007. Myosin II regulates  
29 complex cellular arrangement and epithelial architecture in *Drosophila*. *Dev*  
30 *Cell* 13, 717–729.
- 31 Escudero, L.M., Costa Lda, F., Kicheva, A., Briscoe, J., Freeman, M.,  
32 Babu, M.M., 2011. Epithelial organisation revealed by a network of cellular  
33 contacts. *Nat Commun* 2, 526. doi:10.1038/ncomms1536ncomms1536 [pii]
- 34 Etournay, R., Merkel, M., Popović, M., Brandl, H., Dye, N.A., Aigouy, B.,  
35 Salbreux, G., Eaton, S., Jülicher, F., 2016. TissueMiner: A multiscale  
36 analysis toolkit to quantify how cellular processes create tissue dynamics.  
37 *Elife* 5, 773–786. doi:10.7554/eLife.14334
- 38 Farhadifar, R., Roper, J.C., Aigouy, B., Eaton, S., Jülicher, F., 2007. The  
39 influence of cell mechanics, cell-cell interactions, and proliferation on  
40 epithelial packing. *Curr Biol* 17, 2095–2104.
- 41 Fletcher, A.G., Osterfield, M., Baker, R.E., Shvartsman, S.Y., 2014. Vertex  
42 models of epithelial morphogenesis. *Biophys. J.* 106, 2291–2304.  
43 doi:10.1016/j.bpj.2013.11.4498
- 44 Gibson, M.C., Patel, A.B., Nagpal, R., Perrimon, N., 2006. The emergence  
45 of geometric order in proliferating metazoan epithelia. *Nature* 442, 1038–



- 1 1041.
- 2 Gibson, W.T., Veldhuis, J.H., Rubinstein, B., Cartwright, H.N., Perrimon,  
3 N., Brodland, G.W., Nagpal, R., Gibson, M.C., 2011. Control of the mitotic  
4 cleavage plane by local epithelial topology. *Cell* 144, 427–438.  
5 doi:10.1016/j.cell.2010.12.035S0092-8674(10)01527-8 [pii]
- 6 Girdler, G.C., Roper, K., 2014. Controlling cell shape changes during  
7 salivary gland tube formation in *Drosophila*. *Semin Cell Dev Biol* 31, 74–81.  
8 doi:10.1016/j.semcd.2014.03.020
- 9 Guirao, B., Rigaud, S.U., Bosveld, F., Bailles, A., López-Gay, J., Ishihara,  
10 S., Sugimura, K., Graner, F., Bellaïche, Y., 2015. Unified quantitative  
11 characterization of epithelial tissue development. *Elife* 4, 773–786.  
12 doi:10.7554/eLife.08519
- 13 Hayes, W., Sun, K., Pržulj, N., 2013. Graphlet-based measures are  
14 suitable for biological network comparison. *Bioinformatics* 29, 483–491.  
15 doi:10.1093/bioinformatics/bts729
- 16 Heisenberg, C.P., Bellaïche, Y., 2013. Forces in tissue morphogenesis and  
17 patterning. *Cell* 153, 948–962. doi:10.1016/j.cell.2013.05.008S0092-  
18 8674(13)00573-4 [pii]
- 19 Heller, D., Hoppe, A., Restrepo, S., Gatti, L., Tournier, A.L., Tapon, N.,  
20 Basler, K., Mao, Y., 2016. EpiTools: An Open-Source Image Analysis  
21 Toolkit for Quantifying Epithelial Growth Dynamics. *Dev Cell* 36, 103–116.  
22 doi:S1534-5807(15)00797-2 [pii]10.1016/j.devcel.2015.12.012
- 23 Ho, H., Milenković, T., Memisević, V., Aruri, J., Przulj, N., Ganesan, A.K.,  
24 2010. Protein interaction network topology uncovers melanogenesis  
25 regulatory network components within functional genomics datasets. *BMC*  
26 *Syst. Biol.* 4, 84. doi:10.1186/1752-0509-4-84
- 27 Hocevar, T., Demsar, J., 2014. A combinatorial approach to graphlet  
28 counting. *Bioinformatics* 30, 559–565. doi:10.1093/bioinformatics/btt717
- 29 Khan, Z., Wang, Y.-C., Wieschaus, E.F., Kaschube, M., 2014. Quantitative  
30 4D analyses of epithelial folding during *Drosophila* gastrulation.  
31 *Development* 141, 2895–2900. doi:10.1242/dev.107730
- 32 Kram, Y.A., Mantey, S., Corbo, J.C., 2010. Avian cone photoreceptors tile  
33 the retina as five independent, self-organizing mosaics. *PLoS One* 5, e8992.  
34 doi:10.1371/journal.pone.0008992
- 35 Kuchaiev, O., Stevanovi, A., Hayes, W., 2011. GraphCrunch 2: Software  
36 tool for network modeling , alignment and clustering. doi:10.1186/1471-  
37 2105-12-24
- 38 Kursawe, J., Bardenet, R., Zartman, J.J., Baker, R.E., Fletcher, A.G., 2016.  
39 Robust cell tracking in epithelial tissues through identification of maximum  
40 common subgraphs. *bioRxiv*. doi:10.1101/049551
- 41 Lecuit, T., Le Goff, L., 2007. Orchestrating size and shape during  
42 morphogenesis. *Nature* 450, 189–192.
- 43 Lecuit, T., Lenne, P.F., 2007. Cell surface mechanics and the control of  
44 cell shape, tissue patterns and morphogenesis. *Nat Rev Mol Cell Biol* 8,  
45 633–644.

- 1 Lewis, F.T., 1928. The correlation between cell division and the shapes  
2 and sizes of prismatic cells in the epidermis of cucumis. *Anatom. Rec.* 38,  
3 341–376.
- 4 Lloyd, S., 1982. Least square quantization in PCM. *IEEE Trans. Inform.*  
5 *Theory* 28, 129–137.
- 6 Mao, Y., Tournier, A.L., Bates, P.A., Gale, J.E., Tapon, N., Thompson,  
7 B.J., 2011. Planar polarization of the atypical myosin Dachs orients cell  
8 divisions in *Drosophila*. *Genes Dev* 25, 131–136.  
9 doi:10.1101/gad.61051125/2/131 [pii]
- 10 Mao, Y., Tournier, A.L., Hoppe, A., Kester, L., Thompson, B.J., Tapon, N.,  
11 2013. Differential proliferation rates generate patterns of mechanical tension  
12 that orient tissue growth. *EMBO J* 32, 2790–2803.  
13 doi:10.1038/emboj.2013.197emboj2013197 [pii]
- 14 McCollum, F., 2014. Power Diagrams - File Exchange - MATLAB Central  
15 [WWW Document]. URL  
16 [https://es.mathworks.com/matlabcentral/fileexchange/44385-power-](https://es.mathworks.com/matlabcentral/fileexchange/44385-power-diagrams)  
17 [diagrams](https://es.mathworks.com/matlabcentral/fileexchange/44385-power-diagrams) (accessed 3.10.16).
- 18 Mirams, G.R., Arthurs, C.J., Bernabeu, M.O., Bordas, R., Cooper, J.,  
19 Corrias, A., Davit, Y., Dunn, S.J., Fletcher, A.G., Harvey, D.G., Marsh, M.E.,  
20 Osborne, J.M., Pathmanathan, P., Pitt-Francis, J., Southern, J., Zemezmi,  
21 N., Gavaghan, D.J., 2013. Chaste: an open source C++ library for  
22 computational physiology and biology. *PLoS Comput Biol* 9, e1002970.  
23 doi:10.1371/journal.pcbi.1002970PCOMPBIOL-D-12-01337 [pii]
- 24 Nagpal, R., Patel, A., Gibson, M.C., 2008. Epithelial topology. *BioEssays*  
25 30, 260–266. doi:10.1002/bies.20722
- 26 Patel, A.B., Gibson, W.T., Gibson, M.C., Nagpal, R., 2009. Modeling and  
27 inferring cleavage patterns in proliferating epithelia. *PLoS Comput Biol* 5,  
28 e1000412. doi:10.1371/journal.pcbi.1000412
- 29 Pilot, F., Lecuit, T., 2005. Compartmentalized morphogenesis in epithelia:  
30 from cell to tissue shape. *Dev Dyn* 232, 685–694.
- 31 Pržulj, N., 2007. Biological network comparison using graphlet degree  
32 distribution. *Bioinformatics* 23, 177–183. doi:10.1093/bioinformatics/btl301
- 33 Przulj, N., Corneil, D.G., Jurisica, I., 2004. Modeling interactome: scale-  
34 free or geometric? *Bioinformatics* 20, 3508–3515.  
35 doi:10.1093/bioinformatics/bth436
- 36 Pržulj, N., Corneil, D.G., Jurisica, I., 2004. Modeling interactome: scale-  
37 free or geometric? 20, 3508–3515. doi:10.1093/bioinformatics/bth436
- 38 Sánchez-Gutiérrez, D., Sáez, A., Gómez-Gálvez, P., Paradas, C.,  
39 Escudero, L.M., 2017. Rules of tissue packing involving different cell types:  
40 human muscle organization. *Sci. Rep.* 7, 40444. doi:10.1038/srep40444
- 41 Sanchez-Gutierrez, D., Saez, A., Pascual, A., Escudero, L.M., 2013.  
42 Topological progression in proliferating epithelia is driven by a unique  
43 variation in polygon distribution. *PLoS One* 8, e79227.  
44 doi:10.1371/journal.pone.0079227PONE-D-13-27658 [pii]
- 45 Sanchez-Gutierrez, D., Tozluoglu, M., Barry, J.D., Pascual, A., Mao, Y.,



- 1 Escudero, L.M., 2016. Fundamental physical cellular constraints drive self-  
2 organization of tissues. *EMBO J* 35, 77–88.  
3 doi:10.15252/emj.201592374embj.201592374 [pii]
- 4 Schindelin, J., Arganda-Carreras, I., Frise, E., Kaynig, V., Longair, M.,  
5 Pietzsch, T., Preibisch, S., Rueden, C., Saalfeld, S., Schmid, B., Tinevez, J.-  
6 Y., White, D.J., Hartenstein, V., Eliceiri, K., Tomancak, P., Cardona, A.,  
7 2012. Fiji: an open-source platform for biological-image analysis. *Nat.*  
8 *Methods* 9, 676–682. doi:10.1038/nmeth.2019
- 9 Tanaka, S., Sichau, D., Iber, D., 2015. LBIBCell: a cell-based simulation  
10 environment for morphogenetic problems. *Bioinformatics* 31, 2340–7.  
11 doi:10.1093/bioinformatics/btv147
- 12 Yamashita, S., Michiue, T., 2014. Quantitative analysis of cell arrangement  
13 indicates early differentiation of the neural region during *Xenopus*  
14 gastrulation. *J. Theor. Biol.* 346, 1–7. doi:10.1016/j.jtbi.2013.12.029
- 15 Yoon, C.H., Lee, J., Jongeward, G.D., Sternberg, P.W., 1995. Similarity of  
16 *sli-1*, a regulator of vulval development in *C. elegans*, to the mammalian  
17 proto-oncogene *c-cbl*. *Science* (80-. ). 269, 1102–1105.
- 18 Yu, F.X., Guan, K.L., 2013. The Hippo pathway: regulators and  
19 regulations. *Genes Dev* 27, 355–371. doi:10.1101/gad.210773.11227/4/355  
20 [pii]
- 21 Zallen, J.A., Zallen, R., 2004. Cell-pattern disordering during convergent  
22 extension in *Drosophila*. *J. Phys. Condens. matter.* 16, S5073–S5080.  
23  
24

1 **Figure 1. Graphlets, cellular motifs and characterization of epithelial**  
2 **organization. A)** A representation of the cellular motifs that correspond to  
3 graphlets of up to five nodes. There are 29 motifs corresponding to 26  
4 different graphlets (**Fig. S1**). Note that one graphlet can represent two  
5 cellular motifs (G8, G23 and G26). Mauve motifs form the Mo17 set.  
6 Prussian Blue motifs capture three, four and more than seven sided cells. In  
7 the first row are the motifs that account for the organization of groups of up  
8 to 4 cells (Mo10). Therefore, Mo7 set is formed by the mauve coloured  
9 graphlets at the first row. **B)** Polygon distribution comparison of images  
10 from: Voronoi diagram 1 (black bar), Eye (orange), Voronoi diagram 4  
11 (gray), dWL(green), Voronoi diagram 5 (light gray), dWP (red). Data shown  
12 refer to the mean  $\pm$  SEM. Diagram 1, 4 and 5: 20 replicates. Eye: 3 samples.  
13 dWL: 15 samples. dWP: 16 samples. **C)** GDD value calculation (Mo17)  
14 between natural images and Voronoi diagrams with similar polygon  
15 distribution. The data shown are the mean of the GDD between each pair of  
16 images.  
17

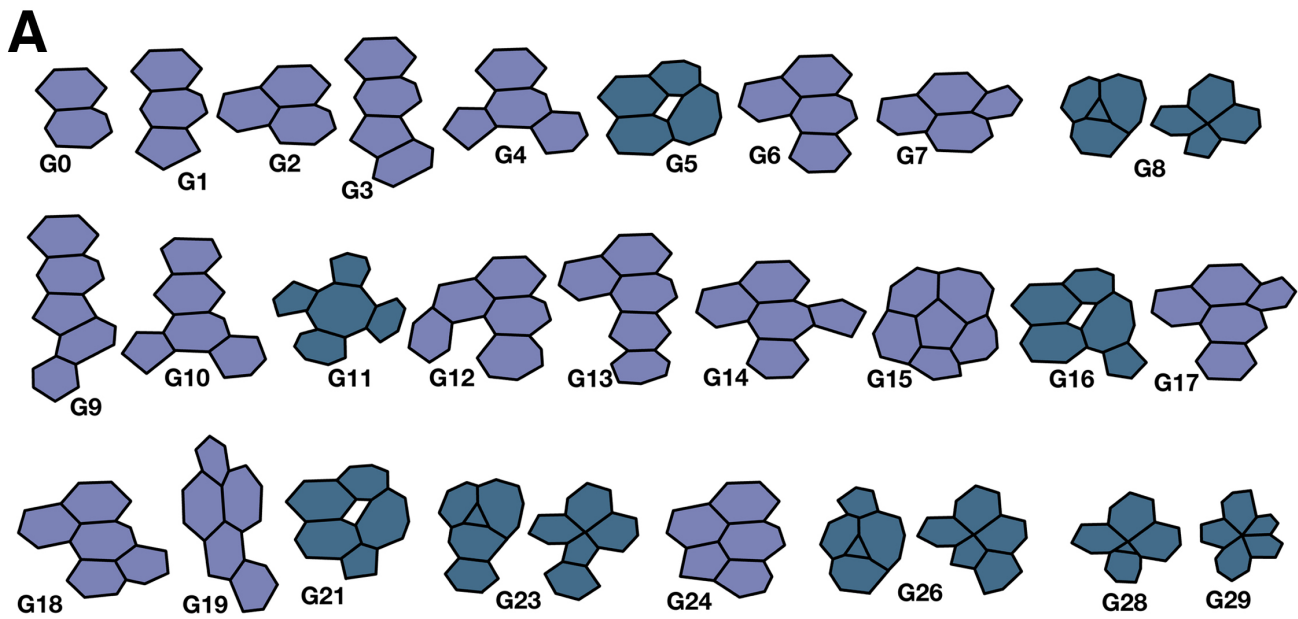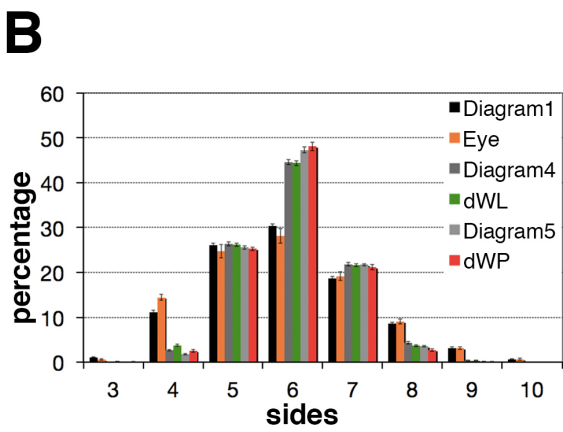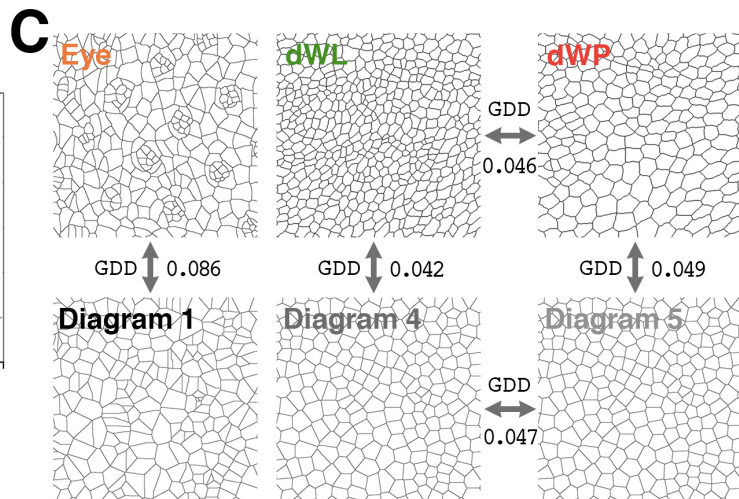

1 **Figure 2. Epithelial organization of biological tissues with respect the**  
2 **CVTn. A-C)** Tessellations with the corresponding graph of cell-to-cell  
3 contacts for a perfect hexagonal arrangement **(A)** a Voronoi Diagram 1 **(B)**  
4 and a Voronoi Diagram 5 **(C)** from a CVTn. These tessellations represent  
5 the diagrams used as reference to calculate the GDDH, GDDRV and  
6 GDDV5 respectively. The light blue edges in these panels represent the  
7 cellular connectivity network. The colourful nodes mark the valid cells that  
8 were involved in the cellular motifs to measure graphlets presence. The dark  
9 blue and green nodes are the 4' valid cells (cells that did not have a no valid  
10 cell within a distance of four cells connexions), which were used to calculate  
11 the graphlets for Mo10 and Mo7. The green nodes are the 5' valid cells  
12 (cells that did not have a no valid cell within a distance of five cells  
13 connexions) that were used to quantify the graphlets for Mo29 and Mo17.  
14 Cells without nodes were no valid cells for graphlet calculation. **D–G)** Plots  
15 showing the different combinations of the values for Mo17 of GDDH,  
16 GDDRV, GDDV5 and percentage hexagons. The diagrams of the CVTn  
17 path from the iteration 1 until the iteration 700 are represented as a  
18 grayscale beginning in black and reducing its darkness with the increase of  
19 the iterations. The natural tessellations are: Eye, *Drosophila* eye disc, 3  
20 replicates, orange. cNT, chicken embryo neural tube epithelium, 16  
21 replicates, light blue. dWL, *Drosophila* larva wing disc, 15 replicates, green.  
22 dWP, *Drosophila* prepupal wing imaginal disc epithelium, 16 replicates, red.  
23 Circumferences are individual values, circles are the average value obtained  
24 from the individual samples from each category.  
25

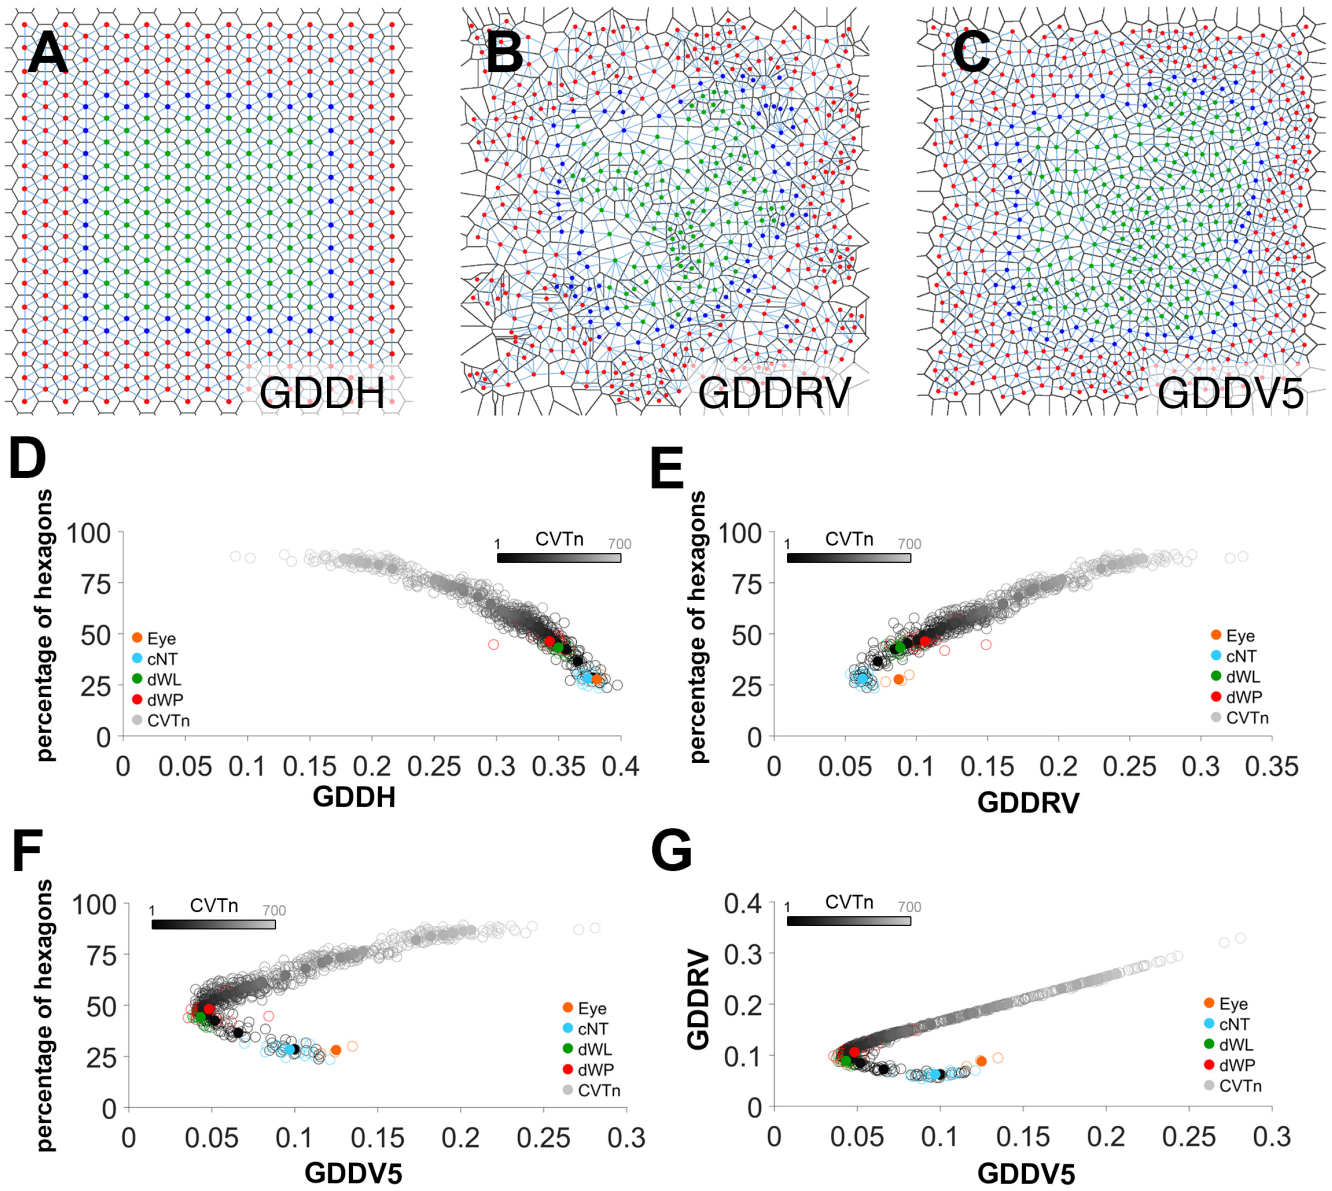

1 **Figure 3. Comparison of different simulations and mutants with the**  
2 **CVTn. A)** Several representative diagrams from the CVTw. Aquamarine  
3 blue cells incorporate a bigger weight than the rest of the cells in the  
4 tessellation in each iteration. The dark blue colour labels the adjacent cells  
5 to the group with higher weight. In (B), (C), (H) and (I) the diagrams of the  
6 CVTn path from the iteration 1 until the iteration 100 are represented as a  
7 grayscale beginning in black and reducing its darkness with the increase of  
8 the iterations; circumferences are individual values, circles are the average  
9 value obtained from the individual samples from each category. **B-C)** Plots  
10 showing the values of the percentage of hexagons vs GDDH (Mo17) (B) and  
11 GDDRv vs GDDV5 (C) for CVTn, Eye, cNT, dWL, dWP, CVTw1 and  
12 CVTw2. CVTw1 represent the cells with weight in (A) from iterations 4, 10,  
13 20, 30, 40, 50, 60, 70 and 80 (increase darkness of aquamarine blue from 4  
14 to 80). CVTw2 represent the adjacent cells to the group with higher weight in  
15 (A) from iterations 4, 10, 20, 30, 40, 50, 60, 70 and 80 (increase darkness of  
16 dark blue from 4 to 80). **D)** Cell arrangement resulting from the control  
17 simulation that includes cell proliferation **F-G)** Diagrams resulting from a  
18 vertex model simulation with an increase of the ideal area value, with  
19 respect the control, in some cells. Case III and Case IV slightly differ in the  
20 line-tension parameter conditions (see **Experimental Procedures**). **H-I)**  
21 Plots showing the values of the percentage of hexagons vs GDDRv (Mo17)  
22 (H) and GDDRv vs GDDV5 (I) for CVTn, Eye, cNT, dWL, dWP Control,  
23 Case III and Case IV.  
24



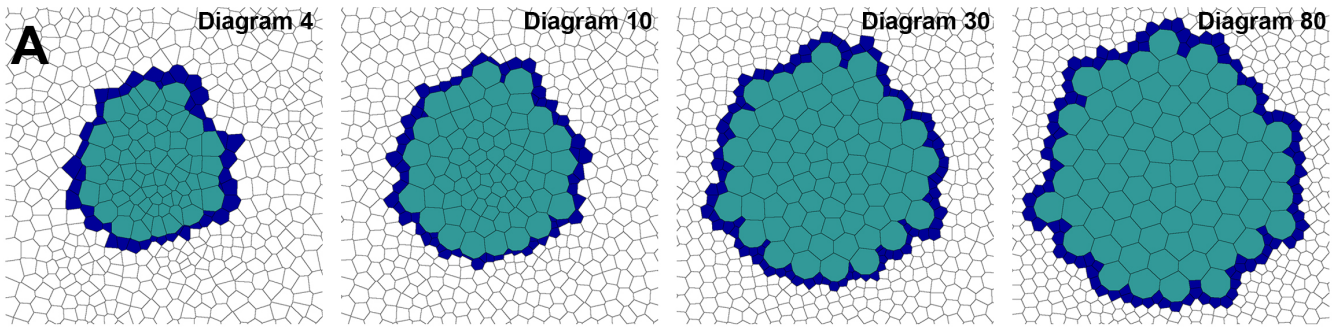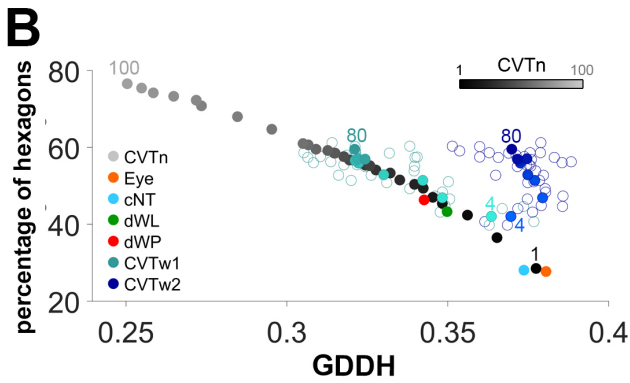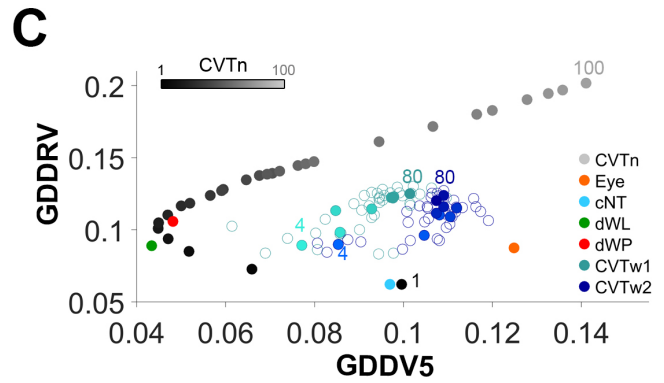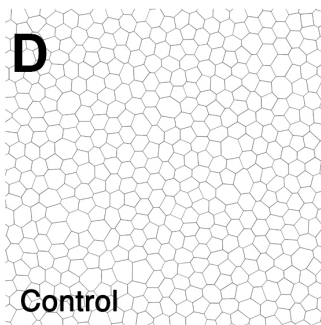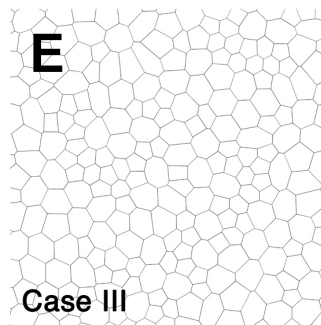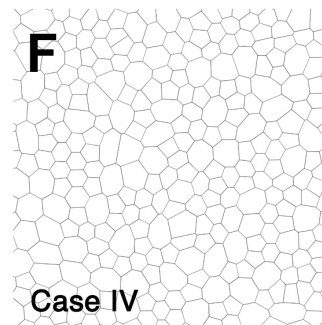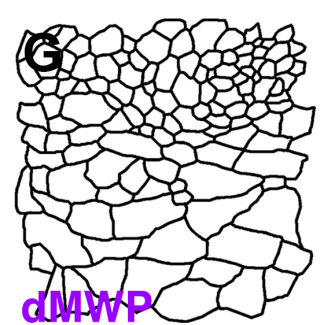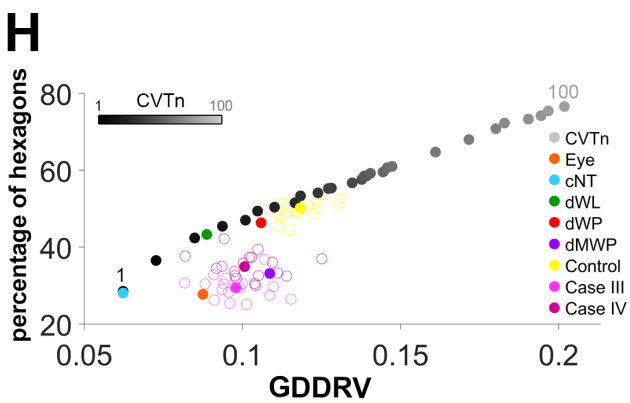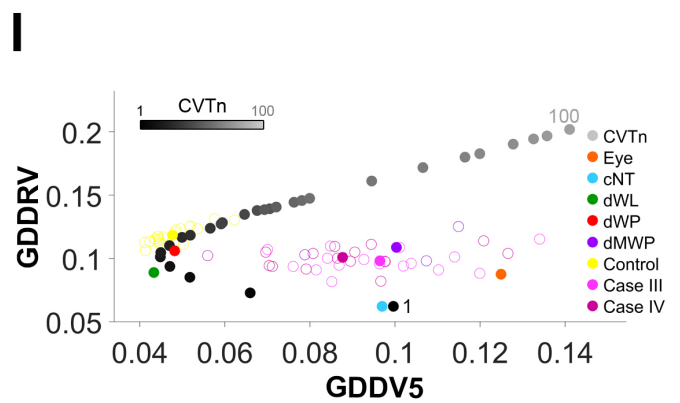

1 **Figure 4. EpiGraph can evaluate the changes in epithelial organization**  
2 **of a morphogenetic process. A)** Time points selected from “Movie S1”  
3 from Blankenship and cols., 2006 article (url: [https://ars.els-](https://ars.els-cdn.com/content/image/1-s2.0-S153458070600400X-mmc2.mov)  
4 [cdn.com/content/image/1-s2.0-S153458070600400X-mmc2.mov](https://ars.els-cdn.com/content/image/1-s2.0-S153458070600400X-mmc2.mov))  
5 (Blankenship et al., 2006). We do not show these panels in this version of  
6 the manuscript since we have not been able to obtain the editorial  
7 permission yet. **B-C)** Captures from the 3D visualization tool of EpiGraph  
8 showing the position of CVTn (1-700), Eye, cNT, dWL, dWP, and the eight  
9 frames showed in (A). GDDH, GDDRV and percentage of hexagons (Mo17)  
10 are the axes in (B). GDDH, GDDRV and GDDV5 (Mo17) are the axes in (C).  
11



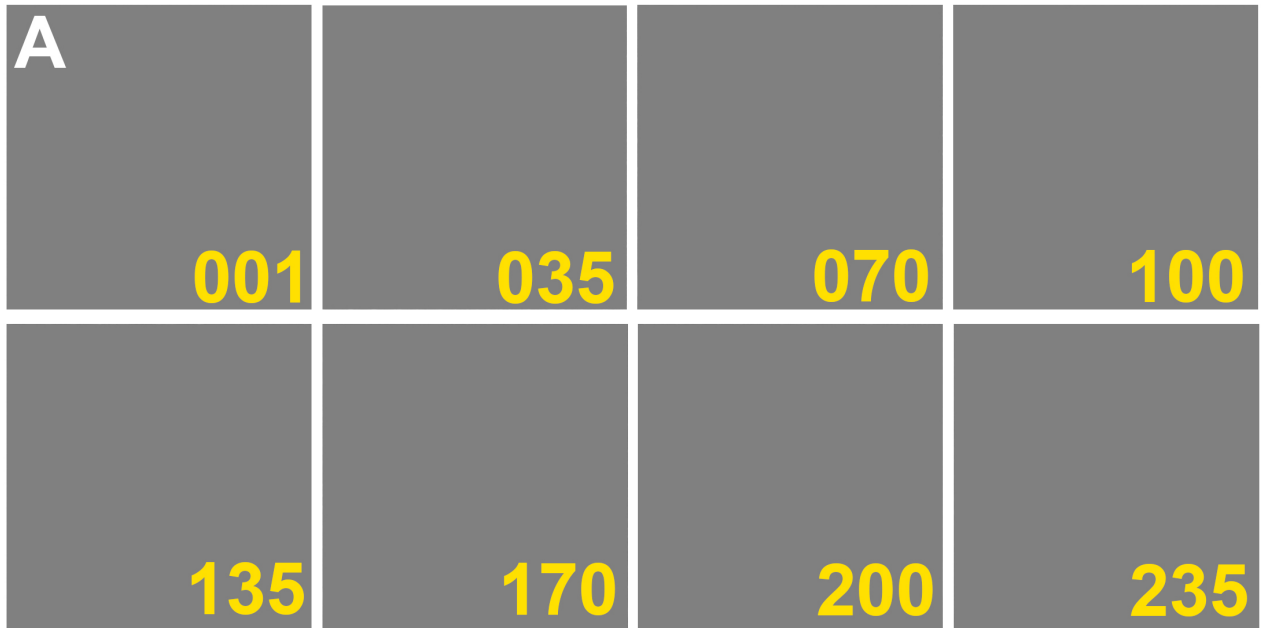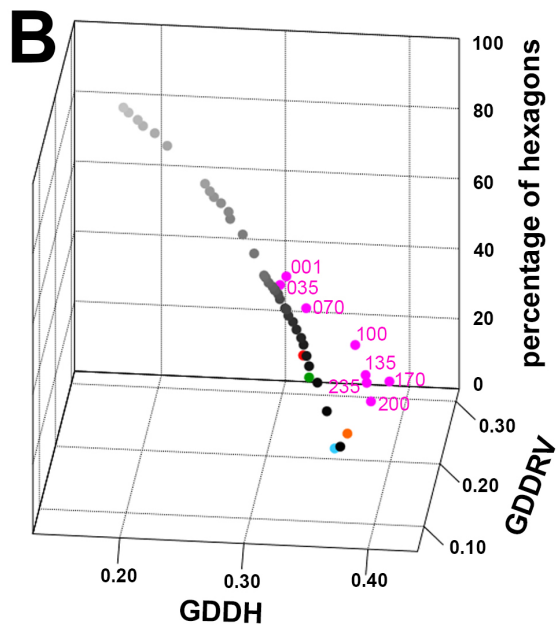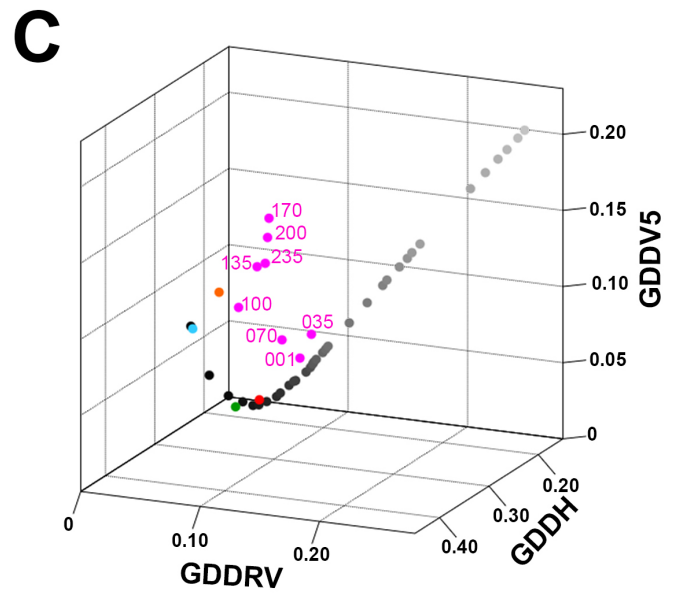

Source: https://www.biorxiv.org/content/10.1101/217521v1.full.pdf
