# **EpiGraph: an open-source platform to quantify epithelial organization.**

Pablo Vicente-Munuera<sup>1,†</sup>, Pedro Gómez-Gálvez<sup>1,†</sup>, Robert J. Tetley<sup>2</sup>, Cristina Forja<sup>1</sup>, Antonio Tagua<sup>1</sup>, Marta Letrán<sup>1</sup>, Melda Tozluoglu<sup>2</sup>, Yanlan Mao<sup>2,3,\*</sup> and Luis M. Escudero<sup>1,\*</sup>.

1: Instituto de Biomedicina de Sevilla (IBiS), Hospital Universitario Virgen del Rocío/CSIC/Universidad de Sevilla and Departamento de Biología Celular, Universidad de Sevilla. 41013 Seville, Spain.

2: MRC Laboratory for Molecular Cell Biology, University College London, Gower Street, London WC1E 6BT, UK.

3: College of Information and Control, Nanjing University of Information Science and Technology, Nanjing, Jiangsu 210044, China

†: These authors contributed equally to this work.

\*: Corresponding authors: Yanlan Mao ([y.mao@ucl.ac.uk](mailto:y.mao@ucl.ac.uk)) and L.M. Escudero ([lmescudero-ibis@us.es](mailto:lmescudero-ibis@us.es)).

# 1 **SUMMARY**

2

3 During development, cells must coordinate their differentiation with their

4 growth and organization to form complex multicellular structures such as

5 tissues and organs. Healthy tissues must maintain these structures during

6 homeostasis. Epithelia are packed ensembles of cells from which the different

7 tissues of the organism will originate during embryogenesis. A large barrier to

8 the analysis of the morphogenetic changes in epithelia is the lack of simple

9 tools that enable the quantification of cell arrangements. Here we present

10 EpiGraph, an image analysis tool that quantifies epithelial organization. Our

11 method combines computational geometry and graph theory to measure the

12 degree of order of any packed tissue. EpiGraph goes beyond the traditional

13 polygon distribution analysis, capturing other organizational traits that

14 improve the characterization of epithelia. EpiGraph can objectively compare

15 the rearrangements of epithelial cells during development and homeostasis

16 to quantify how the global ensemble is affected. Importantly, it has been

17 implemented in the open-access platform FIJI. This makes EpiGraph very

18 user friendly, with no programming skills required.

19

# 1 INTRODUCTION

2 The development of any multicellular organism is based on coordinated  
3 changes that transform the embryo into the adult individual. During  
4 morphogenesis and growth, patterning, cell divisions and architectural  
5 changes must perfectly fit together for the correct development of the body  
6 plan. Any morphogenetic movement such as migration, extension or  
7 invagination of epithelial cells is coupled with dramatic changes in the  
8 organization of cells (Bertet et al., 2004; Blankenship et al., 2006; Escudero  
9 et al., 2007; Farhadifar et al., 2007; Girdler and Roper, 2014; Lecuit and  
10 Lenne, 2007; Pilot and Lecuit, 2005). After development, homeostatic tissues  
11 must maintain their complex organization of cells in order to function correctly.

12 How tissues modulate and maintain their organization during development  
13 and homeostasis is an important question that remains unsolved. This is  
14 mainly due to the lack of simple and general methods that can capture and  
15 quantify the arrangement of cells. It has been known for almost a hundred  
16 years that epithelial tissues exhibit a degree of order. The analysis of epithelial  
17 organization has been mainly based on the number of neighbours of the  
18 epithelial cells, considering the apical surface of these cells as convex  
19 polygons with the same number of sides as neighbours. In previous works,  
20 we have investigated several aspects of the organization of packed tissues  
21 using Voronoi tessellations to compare the polygon distributions of natural  
22 and mathematical tessellations (Sanchez-Gutierrez et al., 2016). We have  
23 described that the polygon distribution of natural tessellations is restricted to  
24 a series of frequencies of polygons that match the Voronoi diagrams that  
25 conform to the Centroidal Voronoi tessellation (CVT). This is what we call a  
26 “CVT path” and was used as a scale to compare the organization of different  
27 packed tissues. However, polygon distribution is not sufficient to completely  
28 characterize tissue organization. Tissues with clearly different appearance  
29 can present very similar polygon distribution (Sanchez-Gutierrez et al., 2016).

30 As an alternative approach, we have proposed that Graph Theory could  
31 capture differences in the topology of tissues (Escudero et al., 2011;  
32 Sanchez-Gutierrez et al., 2013; Sánchez-Gutiérrez et al., 2017). This is based  
33 on the idea of converting the epithelium into a network of cell-to-cell contacts

(Escudero et al., 2011). The resulting “epithelial graph” can be analysed by combining the tools of network theory and multivariable statistical analysis (Escudero et al., 2011; Kursawe et al., 2016; Sanchez-Gutierrez et al., 2013; Yamashita and Michiue, 2014). This approach has been adapted to analyze biomedical tissue samples, useful in clinical research and the development of diagnostic tools (Csikász-Nagy et al., 2013; Guillaud et al., 2010; Sáez et al., 2013; Sánchez-Gutiérrez et al., 2017). Finding features and patterns that can describe the graphs is key in many diverse fields, including biology (Benson et al., 2016; Costa et al., 2007; Hayes et al., 2013). A network can be split up into different subgraphs named graphlets. The graphlet composition of a network has been used to quantify differences between complex systems (Hayes et al., 2013; Ho et al., 2010; Kuchaiev et al., 2011; Pržulj et al., 2004). These measurements are based on the comparison of the quantity of each subgraph in different networks, providing an index of distance between them. This feature has the advantage of integrating the differences between diverse networks into a single value, simplifying the analyses and allowing multiple comparisons.

In summary, there is a clear need for a method to specifically quantify tissue organization and aid the interpretation of biophysical and mechanical aspects of morphogenesis and tissue homeostasis. The advances in imaging techniques, together with the appearance of powerful methods for automated image analysis (Heller et al., 2016; Khan et al., 2014; Kursawe et al., 2016; Schindelin et al., 2012; Weigert et al., 2018) and new simulation resources (Bi et al., 2016, 2015; Blanchard et al., 2009; Etournay et al., 2016; Fletcher et al., 2014; Guirao et al., 2015; Mirams et al., 2013; Tanaka et al., 2015) provide a large amount of good quality source data that can now be analysed in terms of organization. Here we present an open source platform, EpiGraph, a new image analysis method that uses segmented images from real epithelia or simulations, to easily quantify and compare the organization of packed tissues.

## RESULTS

### Graphlet measurements as an approach to capture organization of packed tissues.

1 In previous studies, a set of 29 graphlets was used to distinguish between  
2 different types of networks (Pržulj et al., 2004) (**Fig. S1**). This method  
3 calculated the Graphlet degree Distribution agreement Distance (GDD)  
4 between two networks (Pržulj, 2007). Therefore, the “GDD value”, that in  
5 theory can range from 0 to 1, weighs the differences among the two  
6 distributions of graphlets; the higher the value, the more different the  
7 arrangements (**Fig. S1** and **Methods**). Epithelial images can be considered  
8 as natural tessellations and converted into networks of cell-to-cell contacts  
9 (Escudero et al., 2011). We have used the “graphlet” approach to capture the  
10 topology of epithelial tissues, making a correlation between graphlets and  
11 cellular motifs (compare **Fig. 1A** and **Fig. S1**). Tessellations give rise to  
12 “geographic networks” (Albert and Barabasi, 2002) that only make sense in a  
13 planar surface. For this reason, when we translated the set of graphlets to  
14 cellular patterns, some of them were redundant or not possible (see  
15 methods). Therefore, in this study we have used a total of 26 graphlets  
16 corresponding to 29 different cellular motifs that account for the organization  
17 of groups of up to 5 cells (**Fig. 1A, Fig. S1**). Most of the analyses performed  
18 in this work were completed with only 17 motifs (17-motifs, **Fig. 1A**, mauve).  
19 We found that, although all the motifs could be present in an actual tissue,  
20 17-motifs minimized the redundancy of the information provided by the  
21 graphlets. In addition, this set downplays the importance of rare cellular  
22 geometries that could excessively weight GDD calculations (for example, a  
23 high difference in GDD could appear when comparing an image with one or  
24 two quadrilateral cells versus another image with no four-sided cells; this  
25 effect is minimized using 17-motifs). However, it would be possible to use  
26 other combinations such as all the motifs (29-motifs) or cellular motifs that  
27 account for the organization of groups of up to 4 cells (10-motifs) (**Fig. 1A**).

## 28 **Graphlet measurements capture differences beyond polygon** 29 **distributions.**

30 We tested the power of graphlet-based measurements in quantifying  
31 differences between sets of images with very similar polygon distributions  
32 (**Fig. 1B**). In third instar larvae of *Drosophila*, the photoreceptors are  
33 specified, giving rise to a particular repetitive arrangement of the presumptive

1 eye cells (Eye, **Fig. 1C**). This arrangement is very different to the irregular  
2 distribution in a Voronoi tessellation where the initial seeds were placed in a  
3 random way (Sanchez-Gutierrez et al., 2016), (Diagram 1, **Fig. 1C**). We  
4 previously showed that it was not possible to discriminate between the  
5 polygon distributions of these two tessellations (Sanchez-Gutierrez et al.,  
6 2016). Using the graphlets approach, we obtained a GDD value of 0.086  
7 when comparing these two sets of images (17-motifs, **Table S1, Fig. S2**). In  
8 order to know if this difference was biologically relevant, we tried to set a  
9 baseline, by comparing other images with very similar polygon distribution  
10 that also presented an apparently similar arrangement. This was the case for  
11 Diagram 4 of the CVT vs. the *Drosophila* wing imaginal disc in larvae (dWL)  
12 and Diagram 5 of the CVT vs. the *Drosophila* wing imaginal disc in prepupae  
13 (dWP) (**Fig. 1B-C**). Both results were in the same range, with a GDD value of  
14 0.042 for Diagram 4 vs. dWL and 0.049 for Diagram 5 vs. dWP (**Fig. 1C**).  
15 Similar results were obtained when comparing Diagram 4 vs. Diagram 5 and  
16 dWL vs. dWP (**Fig. 1C**). These results suggested the existence of a baseline  
17 in the range of 0.04-0.05 values that correspond to similar cellular  
18 arrangements that cannot be well distinguished using the graphlets  
19 distribution. Therefore, we interpreted the value of 0.086 obtained in the Eye  
20 vs. Diagram 1 comparison as the reflection of actual differences between  
21 these two sets. In all the mentioned cases, the results obtained using 17-  
22 motifs and 29-motifs were equivalent (**Table S1**).

## 23 **EpiGraph quantitatively compares the organization of multiple sets of** 24 **images.**

25 The GDD had the limitation of comparing only 2 samples each time. Here  
26 we have tried to overcome this limitation evaluating different images  
27 simultaneously using a reference. Therefore, we designed EpiGraph, a  
28 method that calculates the GDD of any epithelial tissue with another  
29 tessellation that serves as a reference. We used three different references: i)  
30 a tessellation formed by regular hexagons, representing the most ordered  
31 way to pave the space (**Fig. 2A**, Epi-Hexagons). ii) the network motifs  
32 emerging from a random Voronoi tessellation (**Fig. 2B**, Epi-Random). iii) a  
33 Voronoi Diagram 5 from the CVT path (**Fig. 2C**, Epi-Voronoi5) that presents

1 a polygon distribution similar to the one from multiple examples in nature  
2 (Gibson et al., 2006; Sanchez-Gutierrez et al., 2016).

3 We tested the method with epithelial images that have been previously  
4 compared with the CVT path in terms of polygon distribution: chicken neural  
5 tube (cNT), dWL, dWP, reduction of myosin II in the *Drosophila* prepupa wing  
6 disc epithelium (dMWP) and Eye (**Fig. 2D**)(Sanchez-Gutierrez et al., 2016).  
7 To have a scale and facilitate fast comparisons, we used the concept of the  
8 CVT path (Sanchez-Gutierrez et al., 2016). We calculated the GDD values  
9 for Epi-Hexagons, Epi-Random and Epi-Voronoi5 for all the Voronoi diagrams  
10 and visualized these results with respect to the percentage of hexagons of  
11 the corresponding diagram (the percentage of hexagons is indicative of the  
12 proportions of the different types of polygons along the CVT, **Table S2**).  
13 However, the CVT does not progress beyond the 70% of hexagons limiting  
14 the possibilities of analysis. Therefore, we extended the Voronoi scale  
15 spanning a wider range of polygon distributions. The algorithm that devises  
16 the CVT was modified to introduce “noise” in the positioning of the seed that  
17 produces the subsequent diagram. In this way, we obtained a “CVT noise”  
18 (CVTn) whose last diagrams reached 90% of hexagons (**Fig. 2E-G, Fig. S3**  
19 **and Material and methods**). Interestingly, the plot obtained using CVT and  
20 CVTn diagrams was an optimum way to easily visualize these geometric  
21 scales as a continuous “CVT path” and a “CVTn path”. Therefore, we used  
22 this framework to analyse the values of Epi-Hexagons, Epi-Random and Epi-  
23 Voronoi5 for each diagram in the scale. As expected, the Epi-Hexagons  
24 values were higher in the initial diagrams and progressively decreased with  
25 the increase in the percentage of hexagons of the Voronoi diagrams (**Fig. 2E,**  
26 **left panel**). The opposite happened in the case of the Epi-Random values  
27 (**Fig. 2E, central panel**). In the plot of percentage of hexagons vs Epi-  
28 Voronoi5, the CVTn path presented the shape of a walking stick (**Fig. 2E,**  
29 **right panel**). The Epi-Voronoi5 values of Voronoi Diagrams 1, 2, 3, and 4  
30 were decreasing progressively, with Diagram 5 the closest to the zero value.  
31 The values for the rest of the diagrams gradually increased, as in the case of  
32 the Epi-Random.



1 We then plotted the values for the actual epithelia. We found that for cNT,  
 2 dWL and dWP the Epi-Hexagons, Epi-Random and Epi-Voronoi5 values were  
 3 similar to the CVTn at the same percentage of hexagons of the polygon  
 4 distribution (**Fig. 2E**). In agreement with our previous results using the GDD,  
 5 the Eye images presented a higher Epi-Random and Epi-Voronoi5 values  
 6 than the expected for a 30% of hexagons (**Fig. 2E**). The differences with  
 7 respect to the CVTn were even more clear when plotting Epi-Hexagons vs  
 8 Epi-Random and Epi-Random vs Epi-Voronoi5 (**Fig. 2F-G**). We obtained  
 9 similar results when analysed the dMWP set of images. In this case, our  
 10 previous work showed a small deviation of the dMWP polygon distribution  
 11 with respect the CVT (Sanchez-Gutierrez et al., 2016). However, using  
 12 Epigraph, we observed that Epi-Random and Epi-Voronoi5 captured the clear  
 13 differences in organization between these images and the CVTn (**Fig. 2E-G**,  
 14 **Fig. S4**). These results suggested that EpiGraph is able to distinguish  
 15 between different tessellations with a similar polygon distribution. In this  
 16 regard, we have developed a statistical output using an outlier detection  
 17 approach whose quantitative results represent how similar the organization  
 18 of a tissue is when compared with the CVTn scale (**Fig. S3** and **Material and**  
 19 **methods**). The test confirmed that cNT, dWL, and dWP were close to the  
 20 CVTn and similar to the Voronoi diagrams 1, 4, and 6 respectively. In contrast,  
 21 the Eye and dMWP samples were labelled as different (**Table S3**). In this way,  
 22 EpiGraph provides a quantitative description of tissue organization.

### 23 **Epigraph can capture different organization traits.**

24 We further investigated the possible applications of EpiGraph and  
 25 performed a series of experiments aimed at understanding what traits of  
 26 tissue organization are being captured and quantified by the graphlet  
 27 measurements. To this end, we have used images of different vertex model  
 28 simulations that alter tissue organization by changing the biophysical  
 29 properties of the cells (images taken from (Sanchez-Gutierrez et al., 2016)  
 30 (**Material and methods** and **Fig. 3A-F**).

31 First, we analysed samples with 10% of the cells having increased effective  
 32 cell-cell adhesion (**Material and methods, Fig. 3B**). This feature induced the  
 33 formation of cells with a “quadrilateral shape” that often organized in motifs



1 presenting four-way vertex configurations. These images were compared with  
2 simulations in which “elongated” cells appear (by simultaneously increasing  
3 cell-cell adhesion and reducing ideal area, **Material and methods** and **Fig.**  
4 **3C**). Epigraph analysis indicated that while control simulations gave similar  
5 values to the CVTn, the “squared” and “elongated” sets of images were  
6 different to the control and well separated from the CVTn. However,  
7 EpiGraph failed to find clear differences between the “squared” and  
8 “elongated” images (**Fig. 3G** and **Fig. S5**).

9 Second, we used a set of conditions to mimic the effect of a reduction of  
10 myosin II in the *Drosophila* prepupa wing disc epithelium (dMWP, **Fig. 2D**). In  
11 the control simulation (**Fig. 3D**), cells grow to double the original area and  
12 then divide into two cells. In case III and case IV simulations there was a  
13 random reduction of the tension parameter together with a requirement of a  
14 minimum tension threshold to be able to divide (**Fig. 3E-F**). If the cells do not  
15 reach this threshold, they continue to grow without dividing the cell body.  
16 When this happens, the cells will be stuck in mitotic phase and will not start a  
17 second round of cell division (Sanchez-Gutierrez et al., 2016) (**Material and**  
18 **methods**). The control simulation gave similar values to the CVTn, while case  
19 III, case IV and dMWP images presented a clear deviation in the Epi-Random  
20 vs Epi-Voronoi5 graph (**Fig. 3G**). All these data-points distributed in the same  
21 zone of the graph. Interestingly, we found that both sets of simulations  
22 (squared and elongated vs Case III and Case IV) appeared in two  
23 complementary regions, suggesting that the regions in the graph can reflect  
24 the existence of different traits of organization in each condition (**Fig. 3G**).

## 25 **EpiGraph: a method to capture epithelial organization implemented in** 26 **FIJI.**

27 Aiming to enhance the accessibility of the analysis of tissue organization to  
28 the biology community, we have implemented EpiGraph as a plugin for FIJI  
29 (Schindelin et al., 2012). EpiGraph consists of a pipeline of 5 very simple  
30 steps. First, the skeleton of an epithelial image is uploaded and the individual  
31 cells are identified. Second, the user selects the distance threshold to identify  
32 two cells as neighbours. Here it is possible to select different thresholds and  
33 to check the number of neighbours of every cell in each case. Third, a ROI is

1 selected. There are several possibilities such as a default ROI from the image  
 2 or the selection of individual cells. Fourth, the graphlet information for the  
 3 selected cells is calculated. These data are used to obtain the Epi-Hexagons,  
 4 Epi-Random and Epi-Voronoi5. These values are incorporated into a table  
 5 and serve as input data for a statistical analysis that indicates if a new image  
 6 is inside or outside of the CVTn path and describes which Voronoi diagram  
 7 presents the most similar organization to the sample (**Material and**  
 8 **methods**). The fifth step includes the classification and labelling of different  
 9 images in order to represent them in a new window. This final phase allows  
 10 one to export the representation of the data in a three-dimensional graph.  
 11 **Movie S1** shows an example of EpiGraph usage. A detailed description of  
 12 EpiGraph can be found in the **Supplementary Material and methods**. A full  
 13 set of tutorials explaining how to install and use EpiGraph is available at  
 14 EpiGraph's wiki (<https://imagej.net/EpiGraph>).

## 15 **EpiGraph provides biological insights regarding homeostasis and** 16 **tissue fluidity transitions**

17 Epithelial tissues have the ability to behave as a fluid due to cellular  
 18 rearrangements or to solidify as cellular rearrangements cease (Bi et al.,  
 19 2016, 2015). The shape index is a characteristic of epithelial cells that has  
 20 been shown, in vertex model simulations, to be able to capture the degree of  
 21 rigidity, or fluidity, of a tissue (Bi et al., 2015). This study established the  
 22 transition point between a soft (fluid) and a rigid (solid) tissue, described as a  
 23 jamming transition, at the dimensionless shape index value of 3.81. We  
 24 calculated the shape index for the CVTn path, finding that from Voronoi  
 25 diagrams 1 to 20, the tessellations were behaving as a fluid (from diagram 21  
 26 to 700 they behave as solid). Using this descriptor, all the images of biological  
 27 tissues were placed in the fluid part as well as the four altered vertex model  
 28 simulations shown in **Fig. 3 (Fig. S4, Fig. S5, Fig. S6 and Table S4)**.

29 We have investigated the dynamics of epithelial jamming in different  
 30 conditions. First, to test the capabilities of EpiGraph in this regard, we  
 31 analysed several snapshots from two simulations published by Bi and  
 32 colleagues as supplementary movies (Bi et al., 2016). These videos show the  
 33 movements of cells in two conditions: rigid state (shape index less than 3.81)

1 and soft state (shape index greater than 3.81) (**Fig. 4A**). As expected, the  
2 snapshots of the soft tissue analysed appeared in different positions,  
3 indicating that the simulated epithelia changed its organization during the  
4 experiment. On the other hand, the different frames from the rigid simulation  
5 were clustered (**Fig. 4B**), showing little cell rearrangements.

6 We next tested whether EpiGraph could detect changes in tissue fluidity in  
7 real epithelia, which may be more ambiguous and noisier than simulations.  
8 Real tissues also display fluid-to-solid jamming transitions which are  
9 important for large scale tissue shape changes as well as for refining and  
10 maintaining tissue shape (Curran et al., 2017; Mongera et al., 2018). In the  
11 *Drosophila* pupal notum, the level of tissue fluidity is controlled by the global  
12 level of myosin II activity (Curran et al., 2017). We wondered if the regulation  
13 of myosin II could similarly impact on the fluidity state of the wing disc  
14 epithelium and the cell rearrangements that have been described during the  
15 late stages of normal wing disc development, where the overall tissue shape  
16 does not dramatically change (Heller et al., 2016) (**Fig. 4C**). To this end, we  
17 compared the WT organization with the effect of increasing myosin II activity  
18 by knocking down Mbs (Myosin binding subunit of the myosin phosphatase,  
19 which dephosphorylates myosin regulatory light chain, **Fig. 4D**) by RNAi  
20 throughout the entire wing pouch. Based on work in the pupal notum (Curran  
21 et al., 2017), we would predict that *Mbs-RNAi* discs behave as solids.  
22 Interestingly, in the two cases, the shape index was greater than the  
23 described shape index threshold of 3.81, suggesting that both tissues are in  
24 a fluid state (**Fig. S6**).

25 We used EpiGraph to analyse the changes in organization of wing discs with  
26 perturbed myosin II activity along time and compared them with a WT  
27 condition. The snapshots for WT samples appeared clustered in the 3D  
28 graph, indicating that the epithelia were not changing their organization during  
29 the 30 minutes of analysis (**Fig. 4E**), despite previous work showing that cell  
30 intercalations do occur (Heller et al., 2016). This suggests that during this  
31 slow growing phase of wing disc development, any cell rearrangements that  
32 occur do not drive large-scale morphogenesis, but act to maintain a  
33 homeostatic tissue topology. The statistical analysis confirmed that all of the

1 WT wing discs were close to CVTn diagrams 3 and 4 (**Table S3**). In the case  
 2 of the three samples from the *Mbs-RNAi* genotype, the data points presented  
 3 different organizations (from similar to diagram 3 to close to diagram 13, see  
 4 **Table S3**). In some cases, the dispersion was not only between samples, but  
 5 occurred between images from each movie (**Fig. 4E** and **Table S3**). EpiGraph  
 6 therefore predicted that these *Mbs-RNAi* wing discs are behaving very  
 7 differently from WT wing discs, likely by changing their degree of fluidity.  
 8 Accordingly, quantification of intercalation rates demonstrated that cell  
 9 rearrangements happen significantly more frequently in WT than in *Mbs-RNAi*  
 10 wing discs (**Fig. 4F**,  $0.1281 \pm 0.08$  vs.  $0.0076 \pm 0.01$  intercalations/cell/hour,  
 11 Kolmogorov-Smirnov test,  $p=0.0079$ ). As predicted, this resulted in more cells  
 12 ‘jamming’ at 4-way vertex configurations as they fail to complete intercalations  
 13 (**Fig. 4G**,  $0.0065 \pm 0.005$  vs.  $0.0116 \pm 0.006$  fourfold vertices/cell, Kolmogorov-  
 14 Smirnov test,  $p=0.029$ ). Interestingly, EpiGraph was able to detect this  
 15 solidification of the tissue in the *Mbs-RNAi* discs, even though the shape index  
 16 predicted a fluid tissue. Taken together, these results indicate that the  
 17 quantification of tissue organization using EpiGraph can infer information  
 18 about the fluidity of a tissue from several fixed snapshots, without the need to  
 19 laboriously track individual frames of a time-lapse video.

20

## 21 **DISCUSSION**

22 Textbook definitions of morphogenesis include the term “organization” as  
 23 key to explaining this fundamental developmental process (Dai and Gilbert,  
 24 1991). The authors wondered, “How can matter organize itself so as to create  
 25 a complex structure such as a limb or an eye?”. Later, changes in organization  
 26 of adult tissues can reflect pathological traits due to defects in homeostasis  
 27 (Csikász-Nagy et al., 2013; Soto and Sonnenschein, 2011). Here, we have  
 28 provided a tool that can help to investigate these questions.

29 The analysis of the polygon sides of epithelial cells has been shown to be  
 30 insufficient to completely understand tissue organization. Some tessellations  
 31 can present very different arrangements yet have the same frequencies of  
 32 number of neighbours. A second problem is the lack of a simple value as an

1 indicator of epithelial organization. This feature complicates the comparison  
2 between morphogenesis of normal development and that of genetically  
3 perturbed or diseased tissues. Our previous attempts to overcome this  
4 caveat were based on multi-statistical analyses of graph features (Sanchez-  
5 Gutierrez et al., 2013) and the creation of a Voronoi scale to statistically  
6 compare groups of images with the CVT reference (Sanchez-Gutierrez et al.,  
7 2016). Several recent works cover part of these integrative analyses  
8 (Blanchard, 2017; Blanchard et al., 2009; Farrell et al., 2017; Guirao et al.,  
9 2015; Jackson et al., 2017). However, we are aware that all these methods  
10 are difficult to incorporate into the average biology or biomedicine lab.

11 We have developed EpiGraph, aiming to bring an easy way to quantify  
12 tissue organization without the requirement for programming skills. EpiGraph  
13 transforms the image into a graph of cell-to-cell contacts and extracts their  
14 graphlet content to later compare with other images. These complex  
15 algorithms are hidden behind the friendly user window of FIJI. This is the  
16 most popular open-source biological image analysis platform. In addition, the  
17 output data options of EpiGraph facilitate fast and clear representations and  
18 interpretations of the results.

19 One of the strengths of EpiGraph is the comparison of any tessellation with  
20 the hexagonal lattice, the “random” Voronoi tessellation and the Voronoi  
21 tessellation that presents the “conserved polygon distribution” (Gibson et al.,  
22 2006; Sanchez-Gutierrez et al., 2016) (**Fig. 2A-C**). We have tested EpiGraph  
23 with different types of samples: as expected, the average of the natural  
24 tessellations such as wing imaginal disc (dWL and dWP) or the chicken neural  
25 tube (cNT) matched the CVTn path position (**Fig. 2D-G**). We interpret that  
26 these three natural samples present similar polygon distributions and graphlet  
27 compositions to some Voronoi Diagrams from the CVTn. On the other hand,  
28 the average of the Eye samples appeared far from the CVTn when Epi-  
29 Voronoi5 or Epi-Random values were plotted (**Fig. 2D-G**). These two  
30 references were capturing differences in organization between the Eye and  
31 any Voronoi Diagram (including Diagram 1, which presents a similar polygon  
32 distribution to the Eye). This result supports the utility of EpiGraph to quantify  
33 organizational traits that were not accessible until now. The same idea is

reinforced by the results obtained with the mutant samples for myosin II (dMWP, **Fig. 2D-G**). In previous work, we showed that this set of samples slightly deviated the CVT scale in terms of polygon distribution (Sanchez-Gutierrez et al., 2016). Here we show very clear differences in terms of the values of Epi-Voronoi5 and Epi-Random (**Fig. 2G**), suggesting a higher sensitivity of the new method when capturing differences in organization.

The output images from EpiGraph show the CVTn path as a clear reference for proliferative epithelia such the wing imaginal disc or the chicken neural tube and for vertex model control simulations. We have incorporated a statistical test into EpiGraph that indicates if a new tissue is within or outside of the CVTn path, and which is the Voronoi diagram with the closest organization. The different results comparing Epi-Hexagons, Epi-Random and Epi-Voronoi5 values also suggested that Epi-Hexagons had better resolution for images with a higher percentage of hexagons while Epi-Random and Epi-Voronoi5 were more sensitive to the differences between images with less than 40% of hexagons. For this reason, we have designed the visualization step of the program to easily change the three axes and check the different results using any combination of these GDD references and the “percentage of hexagons”.

Using different sets of simulations, we are able to distinguish two different types of organization: The cases where a subset of cells adopts a particular arrangement inside a mostly ordered tissue (**Fig 3B, C, G**) and the cases where the global topology of the tissue is altered and the cell sizes are very heterogeneous (**Fig. 3E-G** and **Fig. S5**). These two patterns create a “map” of arrangements that are out the CVTn, and they will help to other researchers to study the degree of order in their samples.

The dynamics of the transition between a tissue behaving as a fluid or a solid is an emerging problem in developmental biology and biomedicine (Curran et al., 2017; Firmino et al., 2016; Mongera et al., 2018; Park et al., 2015; Petridou et al., 2018; Tetley and Mao, 2018). We have used the capabilities of EpiGraph to study how the fluidity state can affect the organization of a tissue. The utility of EpiGraph in this regard is supported by its ability to quantify dynamic changes in organization due to cell



1 rearrangements in a vertex model simulation of a soft tissue (**Fig. 4A-B**).  
2 Therefore, in these simulations, cell movements are captured as changes in  
3 the organization of the tissue by EpiGraph. However, cell rearrangements do  
4 not necessarily have to lead to changes in tissue organization, as is often the  
5 case in more homeostatic tissues. Although, it has been shown that the late  
6 third instar *Drosophila* imaginal disc can exchange neighbours and rearrange  
7 during development (Heller et al., 2016), we were not able to see changes in  
8 organization combining live imaging of the WT discs and EpiGraph analysis  
9 (**Fig. 4E**). Therefore, we interpret that the multiple re-arrangements of the WT  
10 disc conserve the organization of the tissue, at least in the time framework  
11 analysed (30 min). On the contrary, the hyperactivation of myosin II (*Mbs*-  
12 *RNAi*) produced a clear change in the organization of the tissue as detected  
13 by EpiGraph. The decrease of intercalation rate and the increase of fourfold  
14 vertices in the *Mbs-RNAi* discs suggest that EpiGraph is capturing a change  
15 in tissue fluidity (**Fig. 4E-G**). In this respect, we think that EpiGraph analyses  
16 provide information beyond previous parameters that have been used to  
17 capture the fluidity in cell arrangements such as the shape index (Bi et al.,  
18 2015). All the real images analysed in this work have a high shape index (**Fig.**  
19 **S6**). These samples include the *Mbs-RNAi* mutant discs, that do not  
20 intercalate. Altogether, our results suggest that the shape index is not a  
21 sufficient parameter to define fluidity from a still image of a real sample.

22 In biomedicine, a robust and efficient analysis of histopathological images is  
23 required. Computerized image tools have an enormous potential to improve  
24 the quality of histological image interpretation, offering objective analyses that  
25 can aid the pathologist's diagnoses. Changes in organization have proven to  
26 be related to the onset of disease in very different contexts, being critical for  
27 early detection (Emmanuele et al., 2015; Guillaud et al., 2010; Park et al.,  
28 2015; Sáez et al., 2013; Tsuboi et al., 2018). We propose that EpiGraph is  
29 able to efficiently detect mutant phenotypes related to changes in  
30 organization and/or in tissue fluidity. Importantly, this can be done from a few  
31 snapshots in time, without the need for sophisticated time-lapse imaging and  
32 tracking. This may provide a simple detection tool for the early onset of



1 disease, where changes in organization can occur, and only limited tissue  
2 samples are available from patients.

### 3 **EpiGraph limitations.**

4 Although EpiGraph accepts a wide range of images as inputs, we have  
5 specified some minimum requirements. It is not recommended to use input  
6 images bigger than 3000 pixels of width or 3000 pixels of height, since  
7 processing them could be computationally intensive. In addition, EpiGraph  
8 only accepts single images. Images from time series should be adapted to  
9 single frames before uploading them to EpiGraph.

10 Computers with little RAM memory (less than 16gb) will work but with a  
11 series of restrictions. To ensure usability, it is not recommended computing  
12 images with a high number of cells (more than 1000) due to a possible lack  
13 of memory. In the same way, we suggest skeletonizing the edges of the  
14 images and using a small radius, i.e. 3 pixels of radius for skeletonized image  
15 (we recommend don't overpass a radius value of 10 pixels to avoid  
16 overloading the system) to calculate the cells neighbourhood. Choosing a  
17 high radius value could slow down the work queue, increasing the use of RAM  
18 memory.

19 If any of these requirements are not satisfied, the program alerts the user,  
20 allowing him/her to change the image provided. Importantly, the images and  
21 ROIs require a minimum number of valid cells (cells without touching the  
22 borders or an invalid region of the image) in order to get coherent graphlets.  
23 Therefore, to get any result, EpiGraph must detect at least a 3-distance valid  
24 cell (see **Fig. 2**) in the case of 7-motifs or 10-motifs or a 4-distance valid cell  
25 (see **Fig. 2**) in the case of 17-motifs and 29-motifs. In any case, we strongly  
26 recommend having a greater number of 3-distance and 4-distance valid cells  
27 to get results that can be trusted in terms of capturing the organization of a  
28 tissue. Regarding the 3D visualization tool, it allows the user to see the  
29 position of the samples from different angles. However, the resolution of the  
30 exported file is only 72 pixels per inch (dpi). This could be too low for  
31 publications and therefore EpiGraph provides an excel table with all the  
32 information needed to represent it with other programs.

1     In summary, we have generated a very accessible, open source method to  
2     produce a quantitative description of developmental events. This quantitative  
3     aspect is reinforced by the statistical comparison with the CVT path that  
4     serves as a scale for tissue organization. We anticipate that our tool will  
5     improve the study of tissue dynamics and morphogenesis by permitting the  
6     comparative analysis of epithelial organization in genetically mutated or  
7     diseased tissues during time.  
8

# 1 MATERIAL AND METHODS

## 2 Source images used in the study.

### 3 Centroidal Voronoi Tessellation (CVT) diagrams and variations

4 For the generation of this set of paths we have used the software Matlab  
5 R2014b to iteratively apply Lloyd's algorithm to a random Voronoi tessellation  
6 (Lloyd, 1957). This implies that the centroid of a cell in a Voronoi diagram is  
7 the seed for the same cell in the next iteration.

#### 8 - *Centroidal Voronoi Tessellation (CVT) diagrams*

9 Centroidal Voronoi Tessellation diagrams were obtained as described  
10 previously by our group (Sanchez-Gutierrez et al., 2016). The 20 original  
11 Voronoi diagrams were created placing 500 seeds randomly in an image of  
12 1024x1024 pixels. A total of 700 iterations were generated for each initial  
13 image.

#### 14 - *Centroidal Voronoi Tessellation noise (CVTn) diagrams*

15 We have developed a variation of the CVT path, named the CVT noise  
16 (CVTn) path (**Fig. S3**). We started from the same 20 initial random diagrams  
17 described above. The development process of the CVTn path was modified  
18 so that the new seeds were not strictly the centroid from the previous iteration.  
19 In even iterations, we selected a region of 5 pixels of radius from the centroid  
20 position, in which seeds could be placed randomly. In odd iterations, the  
21 system was stabilized, applying the original Lloyd algorithm. A total of 700  
22 iterations were generated for each initial image.

### 23 Natural packed tissues and vertex model simulations

24 The details of the obtaining and processing of the epithelial images were  
25 described in (Escudero et al., 2011). Control vertex model simulations include  
26 cell proliferation and are the basis for the other two cases. Case III  
27 corresponds to a vertex model simulation with heterogeneous reduction of  
28 line tension and an impairment of cell division when tension value is under 30  
29 percent of the initial value. Case IV is a similar simulation to Case III with a  
30 threshold of 40 percent. Regarding simulations with no cell proliferation, as a  
31 baseline, the control had homogeneous parameters for contractility, line  
32  
33

1 tension and ideal area. ‘Elongated’ simulations were as the control, but with  
2 ten percent of cells having a reduced line tension and ideal area, while  
3 ‘squared’ ones had ten percent of cells with only line tension reduced. The  
4 exact conditions for the vertex model simulations were described in  
5 (Sanchez-Gutierrez et al., 2016).

# 6 Perturbing myosin II activity in *Drosophila* wing discs and calculating 7 intercalation rates

8 *Drosophila* were raised in standard conditions. Wing discs were dissected  
9 from third instar larvae and cultured under filters as described by (Zartman et  
10 al., 2013). Discs were cultured in Shields and Sang M3 media supplemented  
11 with 2% FBS, 1% pen/strep, 3ng/ml ecdysone and 2ng/ml insulin. The  
12 following alleles and transgenes were used; *shg*-GFP (Ecad-GFP, Huang et  
13 al., 2009), *UAS-Mbs-RNAi* (KK library, VDRC), *rn*-GAL4 (RMCE-MiMIC  
14 Trojan-GAL4 collection). The following experimental genotypes were used;  
15 Ecad-GFP (WT) and Ecad-GFP/*UAS-Mbs-RNAi*; *rn*-GAL4/+ (*Mbs-RNAi*). For  
16 EpiGraph analysis, discs were imaged on a Zeiss LSM 880 microscope with  
17 Airyscan at 512x512 resolution with a 63x objective (NA 1.4) at 1.4x zoom for  
18 a total of 30 minutes with 1-minute time intervals and a z-step of 0.5µm. Time-  
19 lapse image sequences were segmented using Epitools (Heller et al., 2016).

20 To quantify intercalation rates, 5 WT and 5 *Mbs-RNAi* wing discs were  
21 imaged using the same methods as above, except using 5x zoom and 3  
22 minutes intervals for a total of 2 hours. Intercalation rate data was exported  
23 from the “EDGE\_T1\_TRANSITIONS” overlay in the “CellOverlay” plugin in  
24 Epitools. To exclude mistakes generated when 4-way junctions were not  
25 recognised, junctions less than 0.075µm in length were assigned a length of  
26 0µm. A productive intercalation event was scored when a neighbour  
27 exchange was stabilised for at least 2 time points (6 minutes). The total  
28 number of tracked cells was also quantified, allowing the intercalation rate to  
29 be expressed as the number of intercalations per cell per hour.

30 We also counted the number of fourfold vertices per cell in both WT and  
31 *Mbs-RNAi* conditions. In particular, we quantified the number of vertices in  
32 which four or more cells were touching each other, using Matlab R2014b. The

1 cells closest to the border of the image were excluded from the analysis. In  
2 this way, we obtained the percentage of fourfold vertices per valid cell for  
3 each image and calculated a Kolmogorov-Smirnov test to check if the  
4 distributions of both conditions were different.

## 5 **Soft and Rigid tissue simulations**

6 We have extracted a set of screenshots from two videos that simulated  
7 different dynamical behaviour of vertex model simulations. These videos are  
8 presented as Supplemental Material in (Bi et al., 2016). The first video  
9 represents a rigid behaviour in the simulation:  
10 [https://journals.aps.org/prx/supplemental/10.1103/PhysRevX.6.021011/solid](https://journals.aps.org/prx/supplemental/10.1103/PhysRevX.6.021011/solid_tissue_v0_0.2_p0_3.5_Dr_0.1.mp4)  
11 [\\_tissue\\_v0\\_0.2\\_p0\\_3.5\\_Dr\\_0.1.mp4](https://journals.aps.org/prx/supplemental/10.1103/PhysRevX.6.021011/solid_tissue_v0_0.2_p0_3.5_Dr_0.1.mp4); the second one represents a soft  
12 behaviour: [https://journals.aps.org/prx/supplemental/10.1103/PhysRevX.6.02](https://journals.aps.org/prx/supplemental/10.1103/PhysRevX.6.021011/fluid_tissue_v0_0.2_p0_3.8_Dr_0.1.mp4)  
13 [1011/fluid\\_tissue\\_v0\\_0.2\\_p0\\_3.8\\_Dr\\_0.1.mp4](https://journals.aps.org/prx/supplemental/10.1103/PhysRevX.6.021011/fluid_tissue_v0_0.2_p0_3.8_Dr_0.1.mp4). In both videos, we selected a  
14 total of 13 frames with steps of 3.333 seconds (from  $t = 0$  to 40 seconds).

## 15 **Graphlets and motifs selection.**

16 The different images from the previous section were used to create a graph  
17 of cell-to-cell contacts ((Escudero et al., 2011) and **Supplementary Material**  
18 **and methods**) that served as the source for the graphlet analysis (Pržulj,  
19 2007; Pržulj et al., 2004). First, we adapted the graphlet analysis performed  
20 by EpiGraph to the nature of our samples (tessellations). Three graphlets  
21 were discarded since they were not possible in the context of an epithelial  
22 tissue (**Fig. 1** and **Fig. S1**). Second, we used the computer program for  
23 graphlet identification and calculation ORCA (Orbit Counting Algorithm)  
24 (Hočevár and Demšar, 2014), to extract the different conformations of nodes  
25 assembling the graphlets, called orbits (Pržulj, 2007). We computed the  
26 Graphlet degree Distribution of the 73 given orbits from the 29 graphlets, and  
27 then we removed the non-used ones. The reason to remove these graphlets  
28 was that they were either redundant or not possible in a planar tissue. On the  
29 first case, G5 and G27 were redundant since, in order to achieve G5 in a  
30 plane, there must be a centre cell with 4 sides, the same centre cell captured  
31 on G27 (**Fig 1** and **Fig. S1**). It may occur that more than one cell is inside G5,  
32 which could not be captured by G27, still it would be captured by G5 and the  
33 chances of encounter this setting would be very low. Regarding the second

1 case, G20, G22 and G25 were not possible to achieve in a planar tessellation  
2 since it is assumed the convexity of the cells. Therefore, we removed them.

### 3 **Shape index calculation**

4 We have extracted the shape index, as an indicator of rigidity, from each  
5 natural and simulated image, based on (Bi et al., 2015). The global shape  
6 index in a tissue was measured as the median of the shape index of the  
7 individual valid cells. We quantified the cell area and perimeter using Matlab  
8 R2014b. We performed the following approach: We captured the vertex  
9 coordinates for each valid cell. Then, we calculated the Euclidean distance  
10 between each adjacent vertex, and adding all of them, we got the cell  
11 perimeter. From these vertices, a polygon was inferred and we calculated its  
12 contained area using the “polyarea” Matlab function.

### 13 **Statistical analysis.**

14 We have estimated the closest CVTn diagram of a given image in terms of  
15 the three GDDs measured in EpiGraph (Epi-Hexagons, Epi-Random and Epi-  
16 Voronoi5). We computed the centre of the point cloud formed by the 20  
17 randomizations of a particular CVTn diagram as the mean of those twenty  
18 images, obtaining a 3D point. Then, we calculated the Euclidean distance  
19 between all the CVTn diagrams central points and the three calculated  
20 parameters of the input image, obtaining its closest point, which corresponds  
21 to its closest diagram. Furthermore, we checked if this image belonged to the  
22 closest diagram point cloud using an outlier detection approach. In particular,  
23 we tested if the inclusion of the image into a CVTn diagram point cloud would  
24 increase or decrease the standard deviation of the original group. We  
25 assigned the probability of being an inlier, which is defined as follows:

$$26 \quad confidence\ score = \frac{1}{n} \sum_{i=1}^n \frac{std(closest\ CVTn\ cloud)_i}{std(closest\ CVTn\ cloud + newImg)_i}$$

27 Where n is the total number of coordinates, which in our case is 3 due to  
28 the three-dimensional space; the parameter stands for every different  
29 coordinate (Epi-Hexagons, Epi-Random and Epi-Voronoi5); represents the  
30 values of the 20 images from the closest CVTn diagram in a specific  
31 coordinate and is the value of the input image for the same coordinate. The

1 values range from 0 (very far from point cloud) to  $+\infty$  (inside point cloud). We  
2 have estimated that with a confidence of  $> 0.95$  the input image is considered  
3 to be an inlier.

4

5

6

7



# REFERENCES

- Albert R, Barabasi A-L. 2002. Statistical mechanics of complex networks. *Rev Mod Phys* **74**:47–97.
- Benson AR, Gleich DF, Leskovec J. 2016. Higher-order organization of complex networks. *Science (80- )* **353**:163–166. doi:10.1038/s41588-018-0165-1
- Bertet C, Sulak L, Lecuit T. 2004. Myosin-dependent junction remodelling controls planar cell intercalation and axis elongation. *Nature* **429**:667–671.
- Bi D, Lopez JH, Schwarz JM, Manning ML. 2015. A density-independent rigidity transition in biological tissues. *Nat Phys* **11**:1074–1079. doi:10.1038/nphys3471
- Bi D, Yang X, Marchetti MC, Manning ML. 2016. Motility-driven glass and jamming transitions in biological tissues. *Phys Rev X* **6**. doi:10.1103/PhysRevX.6.021011
- Blanchard GB. 2017. Taking the strain: Quantifying the contributions of all cell behaviours to changes in epithelial shape. *Philos Trans R Soc B Biol Sci*. doi:10.1098/rstb.2015.0513
- Blanchard GB, Kabla AJ, Schultz NL, Butler LC, Sanson B, Gorfinkel N, Mahadevan L, Adams RJ. 2009. Tissue tectonics: morphogenetic strain rates, cell shape change and intercalation. *Nat Methods* **6**:458–464. doi:nmeth.1327 [pii]10.1038/nmeth.1327
- Blankenship JT, Backovic ST, Sanny JS, Weitz O, Zallen JA. 2006. Multicellular rosette formation links planar cell polarity to tissue morphogenesis. *Dev Cell* **11**:459–470.
- Costa LDAF, Rodrigues FA, Travieso G, Boas PR V. 2007. Characterization of complex networks: a survey of measurements. *Adv Phys* **56**:167–242.
- Csikász-Nagy A, Escudero LM, Guillaud M, Sedwards S, Baum B, Cavaliere M. 2013. Cooperation and competition in the dynamics of tissue architecture during homeostasis and tumorigenesis. *Semin Cancer Biol* **23**. doi:10.1016/j.semcancer.2013.05.009
- Curran S, Strandkvist C, Bathmann J, de Gennes M, Kabla A, Salbreux G, Baum B. 2017. Myosin II Controls Junction Fluctuations to Guide Epithelial Tissue Ordering. *Dev Cell* **43**:480–492.e6. doi:10.1016/j.devcel.2017.09.018
- Dai JD, Gilbert LI. 1991. Metamorphosis of the corpus allatum and degeneration of the prothoracic glands during the larval-pupal-adult transformation of *Drosophila melanogaster*: a cytophysiological analysis of the ring gland. *Dev Biol* **144**:309–326.
- Emmanuele V, Kubota A, Garcia-Diaz B, Garone C, Akman HO, Sánchez-Gutiérrez D, Escudero LM, Kariya S, Homma S, Tanji K, Quinzii CM, Hirano M. 2015. Fhl1 W122S causes loss of protein function and late-onset mild myopathy. *Hum Mol Genet* **24**. doi:10.1093/hmg/ddu490
- Escudero LM, Bischoff M, Freeman M. 2007. Myosin II regulates complex cellular arrangement and epithelial architecture in *Drosophila*. *Dev Cell* **13**:717–729.
- Escudero LM, Costa Lda F, Kicheva A, Briscoe J, Freeman M, Babu MM. 2011. Epithelial organisation revealed by a network of cellular contacts. *Nat*

1 *Commun* **2**:526. doi:10.1038/ncomms1536ncomms1536 [pii]

2 Etournay R, Merkel M, Popović M, Brandl H, Dye NA, Aigouy B, Salbreux G,  
3 Eaton S, Jülicher F. 2016. TissueMiner: A multiscale analysis toolkit to  
4 quantify how cellular processes create tissue dynamics. *Elife* **5**:773–786.  
5 doi:10.7554/eLife.14334

6 Farhadifar R, Roper JC, Aigouy B, Eaton S, Jülicher F. 2007. The influence  
7 of cell mechanics, cell-cell interactions, and proliferation on epithelial  
8 packing. *Curr Biol* **17**:2095–2104.

9 Farrell DL, Weitz O, Magnasco MO, Zallen JA. 2017. SEGGA: a toolset for  
10 rapid automated analysis of epithelial cell polarity and dynamics.  
11 *Development* **144**:1725–1734. doi:10.1242/dev.146837

12 Firmino J, Rocancourt D, Saadaoui M, Moreau C, Gros J. 2016. Cell  
13 Division Drives Epithelial Cell Rearrangements during Gastrulation in Chick.  
14 *Dev Cell* **36**:249–261. doi:10.1016/j.devcel.2016.01.007

15 Fletcher AG, Osterfield M, Baker RE, Shvartsman SY. 2014. Vertex models  
16 of epithelial morphogenesis. *Biophys J* **106**:2291–2304.  
17 doi:10.1016/j.bpj.2013.11.4498

18 Gibson MC, Patel AB, Nagpal R, Perrimon N. 2006. The emergence of  
19 geometric order in proliferating metazoan epithelia. *Nature* **442**:1038–1041.

20 Girdler GC, Roper K. 2014. Controlling cell shape changes during salivary  
21 gland tube formation in *Drosophila*. *Semin Cell Dev Biol* **31**:74–81.  
22 doi:10.1016/j.semcdb.2014.03.020

23 Guillaud M, Clem C, Macaulay C. 2010. An in silico platform for the study of  
24 epithelial pre-invasive neoplastic development. *Biosystems* **102**:22–31.  
25 doi:10.1016/j.biosystems.2010.07.008S0303-2647(10)00116-4 [pii]

26 Guirao B, Rigaud SU, Bosveld F, Bailles A, López-Gay J, Ishihara S,  
27 Sugimura K, Graner F, Bellaïche Y. 2015. Unified quantitative  
28 characterization of epithelial tissue development. *Elife* **4**:773–786.  
29 doi:10.7554/eLife.08519

30 Hayes W, Sun K, Pržulj N. 2013. Graphlet-based measures are suitable for  
31 biological network comparison. *Bioinformatics* **29**:483–491.  
32 doi:10.1093/bioinformatics/bts729

33 Heller D, Hoppe A, Restrepo S, Gatti L, Tournier AL, Tapon N, Basler K,  
34 Mao Y. 2016. EpiTools: An Open-Source Image Analysis Toolkit for  
35 Quantifying Epithelial Growth Dynamics. *Dev Cell* **36**:103–116. doi:S1534-  
36 5807(15)00797-2 [pii]10.1016/j.devcel.2015.12.012

37 Ho H, Milenković T, Memisević V, Aruri J, Pržulj N, Ganesan AK. 2010.  
38 Protein interaction network topology uncovers melanogenesis regulatory  
39 network components within functional genomics datasets. *BMC Syst Biol*  
40 **4**:84. doi:10.1186/1752-0509-4-84

41 Hočevár T, Demšar J. 2014. A combinatorial approach to graphlet counting.  
42 *Bioinformatics* **30**:559–565. doi:10.1093/bioinformatics/btt717

43 Jackson MD, Xu H, Duran-Nebreda S, Stamm P, Bassel GW. 2017.  
44 Topological analysis of multicellular complexity in the plant hypocotyl. *Elife*  
45 **6**. doi:10.7554/eLife.26023

46 Khan Z, Wang Y-C, Wieschaus EF, Kaschube M. 2014. Quantitative 4D  
47 analyses of epithelial folding during *Drosophila* gastrulation. *Development*

1 **141**:2895–2900. doi:10.1242/dev.107730

2 Kuchaiev O, Stevanović A, Hayes W, Pržulj N. 2011. GraphCrunch 2:  
3 Software tool for network modeling, alignment and clustering. *BMC*  
4 *Bioinformatics* **12**. doi:10.1186/1471-2105-12-24

5 Kursawe J, Bardenet R, Zartman JJ, Baker RE, Fletcher AG. 2016. Robust  
6 cell tracking in epithelial tissues through identification of maximum common  
7 subgraphs. *J R Soc Interface* **13**. doi:10.1098/rsif.2016.0725

8 Lecuit T, Lenne PF. 2007. Cell surface mechanics and the control of cell  
9 shape, tissue patterns and morphogenesis. *Nat Rev Mol Cell Biol* **8**:633–  
10 644.

11 Lloyd S. 1957. Least square quantization in PCM's. *Bell Teleph Lab* **28**:129–  
12 137.

13 Mirams GR, Arthurs CJ, Bernabeu MO, Bordas R, Cooper J, Corrias A,  
14 Davit Y, Dunn SJ, Fletcher AG, Harvey DG, Marsh ME, Osborne JM,  
15 Pathmanathan P, Pitt-Francis J, Southern J, Zemzemi N, Gavaghan DJ.  
16 2013. Chaste: an open source C++ library for computational physiology and  
17 biology. *PLoS Comput Biol* **9**:e1002970.  
18 doi:10.1371/journal.pcbi.1002970PCOMPBIOL-D-12-01337 [pii]

19 Mongera A, Rowghanian P, Gustafson HJ, Shelton E, Kealhofer DA, Carn  
20 EK, Serwane F, Lucio AA, Giammona J, Campàs O. 2018. A fluid-to-solid  
21 jamming transition underlies vertebrate body axis elongation. *Nature*  
22 **561**:401–405. doi:10.1038/s41586-018-0479-2

23 Park JA, Kim JH, Bi D, Mitchel JA, Qazvini NT, Tantisira K, Park CY, McGill  
24 M, Kim SH, Gweon B, Notbohm J, Steward R, Burger S, Randell SH, Kho  
25 AT, Tambe DT, Hardin C, Shore SA, Israel E, Weitz DA, Tschumperlin DJ,  
26 Henske EP, Weiss ST, Manning ML, Butler JP, Drazen JM, Fredberg JJ.  
27 2015. Unjamming and cell shape in the asthmatic airway epithelium. *Nat*  
28 *Mater* **14**:1040–1048. doi:10.1038/nmat4357

29 Petridou NI, Grigolon S, Salbreux G, Hannezo E, Heisenberg C-P. 2018.  
30 Fluidization-mediated tissue spreading by mitotic cell rounding and non-  
31 canonical Wnt signalling. *Nat Cell Biol* **1**. doi:10.1038/s41556-018-0247-4

32 Pilot F, Lecuit T. 2005. Compartmentalized morphogenesis in epithelia: from  
33 cell to tissue shape. *Dev Dyn* **232**:685–694.

34 Pržulj N. 2007. Biological network comparison using graphlet degree  
35 distribution. *Bioinformatics* **23**:853–854. doi:10.1093/bioinformatics/btl301

36 Pržulj N, Corneil DG, Jurisica I. 2004. Modeling interactome: Scale-free or  
37 geometric? *Bioinformatics* **20**:3508–3515. doi:10.1093/bioinformatics/bth436

38 Sáez A, Rivas E, Montero-Sánchez A, Paradas C, Acha B, Pascual A,  
39 Serrano C, Escudero LM. 2013. Quantifiable diagnosis of muscular  
40 dystrophies and neurogenic atrophies through network analysis. *BMC Med*  
41 **11**:77. doi:10.1186/1741-7015-11-77

42 Sánchez-Gutiérrez D, Sáez A, Gómez-Gálvez P, Paradas C, Escudero LM.  
43 2017. Rules of tissue packing involving different cell types: Human muscle  
44 organization. *Sci Rep* **7**:40444. doi:10.1038/srep40444

45 Sanchez-Gutierrez D, Saez A, Pascual A, Escudero LM. 2013. Topological  
46 progression in proliferating epithelia is driven by a unique variation in  
47 polygon distribution. *PLoS One* **8**:e79227.

1 doi:10.1371/journal.pone.0079227PONE-D-13-27658 [pii]  
2 Sanchez-Gutierrez D, Tozluoglu M, Barry JD, Pascual A, Mao Y, Escudero  
3 LM. 2016. Fundamental physical cellular constraints drive self-organization  
4 of tissues. *EMBO J* **35**:77–88. doi:10.15252/embj.201592374  
5 Schindelin J, Arganda-Carreras I, Frise E, Kaynig V, Longair M, Pietzsch T,  
6 Preibisch S, Rueden C, Saalfeld S, Schmid B, Tinevez J-Y, White DJ,  
7 Hartenstein V, Eliceiri K, Tomancak P, Cardona A. 2012. Fiji: an open-  
8 source platform for biological-image analysis. *Nat Methods* **9**:676–682.  
9 doi:10.1038/nmeth.2019  
10 Soto AM, Sonnenschein C. 2011. The tissue organization field theory of  
11 cancer: A testable replacement for the somatic mutation theory. *BioEssays*  
12 **33**:332–340. doi:10.1002/bies.201100025  
13 Tanaka S, Sichau D, Iber D. 2015. LBIBCell: a cell-based simulation  
14 environment for morphogenetic problems. *Bioinformatics* **31**:2340–7.  
15 doi:10.1093/bioinformatics/btv147  
16 Tetley RJ, Mao Y. 2018. The same but different: Cell intercalation as a  
17 driver of tissue deformation and fluidity. *Philos Trans R Soc B Biol Sci*.  
18 doi:10.1098/rstb.2017.0328  
19 Tsuboi A, Ohsawa S, Umetsu D, Sando Y, Kuranaga E, Igaki T, Fujimoto K.  
20 2018. Competition for Space Is Controlled by Apoptosis-Induced Change of  
21 Local Epithelial Topology. *Curr Biol* **28**:2115–2128.  
22 doi:10.1016/J.CUB.2018.05.029  
23 Weigert M, Schmidt U, Boothe T, Müller A, Dibrov A, Jain A, Wilhelm B,  
24 Schmidt D, Broaddus C, Culley S, Rocha-Martins M, Segovia-Miranda F,  
25 Norden C, Henriques R, Zerial M, Solimena M, Rink J, Tomancak P, Royer  
26 L, Jug F, Myers EW. 2018. Content-aware image restoration: pushing the  
27 limits of fluorescence microscopy. *Nat Methods* **15**:1090–1097.  
28 doi:10.1038/s41592-018-0216-7  
29 Yamashita S, Michiue T. 2014. Quantitative analysis of cell arrangement  
30 indicates early differentiation of the neural region during *Xenopus*  
31 gastrulation. *J Theor Biol* **346**:1–7. doi:10.1016/j.jtbi.2013.12.029  
32 Zartman J, Restrepo S, Basler K. 2013. A high-throughput template for  
33 optimizing *Drosophila* organ culture with response-surface methods.  
34 *Development* **140**:2848–2848. doi:10.1242/dev.098921  
35  
36  
37

1 **Figure 1. Graphlets, cellular motifs and characterization of epithelial**  
2 **organization. A)** A representation of the cellular motifs that correspond to  
3 graphlets of up to five nodes. There are 29 motifs corresponding to 26  
4 different graphlets (**Fig. S1**). Note that one graphlet can represent two cellular  
5 motifs (G8, G23 and G26). Mauve motifs form the 17-motifs set. Prussian  
6 Blue motifs stands for the set 29-motifs. In the first row are the motifs that  
7 account for the organization of groups of up to 4 cells (10-motifs). Therefore,  
8 7-motifs set is formed by the mauve coloured graphlets at the first row. **B)**  
9 Polygon distribution comparison of images from: Voronoi diagram 1 (black  
10 bar); Eye (orange), *Drosophila* eye disc: 3 samples; Voronoi diagram 4 (grey);  
11 dWL (green), *Drosophila* larva wing disc: 15 samples; Voronoi diagram 5 (light  
12 grey), dWP (red), *Drosophila* prepupal wing imaginal disc epithelium: 16  
13 samples. Data shown refer to the mean  $\pm$  SEM. Diagram 1, 4 and 5: 20  
14 replicates. **C)** GDD value calculation (17-motifs) between natural images and  
15 Voronoi diagrams with similar polygon distribution. The data shown are the  
16 mean of the GDD between each pair of images.



**Figure 2. Epithelial organization of biological tissues with respect to the CVTn.** **A-C)** Tessellations with the corresponding graph of cell-to-cell contacts for a perfect hexagonal arrangement (**A**) a Voronoi Diagram 1 (**B**) and a Voronoi Diagram 5 (**C**) from a CVTn. These tessellations represent the diagrams used as reference to calculate the Epi-Hexagons, Epi-Random and Epi-Voronoi5 respectively. The light blue edges in these panels represent the cellular connectivity network. The colourful nodes mark the valid cells that were involved in the cellular motifs to measure graphlets presence. The dark blue and green nodes are the 3-distance valid cells (cells connected exclusively to valid cells within a distance of 3 edges), which were used to calculate the graphlets for 10-motifs and 7-motifs. The green nodes are the 4-distance valid cells (cells connected exclusively to valid cells within a distance of 4 edges) that were used to quantify the graphlets for 29-motifs and 17-motifs. Cells without nodes were no valid cells for graphlet calculation. **D)** Representative images from the natural tessellations. **E)** Plots showing the different combinations of the values for 17-motifs of Epi-Hexagons, Epi-Random and Epi-Voronoi5 with the percentage of hexagons. The diagrams of the CVTn path from the iteration 1 until the iteration 700 are represented as a greyscale beginning in black and reducing its darkness with the increase of the iterations (from 1 to 20, from 30 to 100 by stepwise of 10 and from 100 to 700 by stepwise of 100). **F-G)** Charts representing the comparisons Epi-Hexagons against Epi-Random, and Epi-Random against Epi-Voronoi5, respectively. The CVTn path in both scatter plots, is formed by the diagrams with numbers between 1 and 100, in a greyscale as in (**E**). The natural tessellations are: dMWP (violet), *Drosophila* mutant wing disc: 3 samples; cNT (light blue), chicken neural tube: 16 samples; Eye, dWL and dWP are the same replicates than **Fig.1** and preserve their colour codes. Circumferences are individual values, circles are the average value obtained from the individual samples from each category.

**Figure 3. Comparison of different simulations and mutants with the CVTn. A-C)** Representative images for non-proliferative simulations. Control with homogeneous parameters (**A**). The ‘squared’ simulations are similar to control, but a ten percent of cells (randomly chosen) have a reduced line tension (**B**). The ‘elongated’ simulations have a ten percent of cells (randomly chosen) with its line tension and ideal area reduced, and the another 90% of cells have the same parameters than control simulations (**C**). **D)** Cell arrangement resulting from the control simulation that includes cell proliferation. **E-F)** Diagrams resulting from a vertex model simulation with an increase of the ideal area value, with respect the control, in some cells. Case III and Case IV slightly differ in the line-tension parameter conditions (see **Material and methods**). **G)** Plots showing the values of Epi-Random vs Epi-Voronoi5 and the percentage of hexagons vs Epi-Voronoi5 (17-motifs) for CVTn, dMWP, Eye, cNT, dWL, dWP; Proliferative Control (20 replicates, carnation pink), Case III (17 replicates, hot pink) and Case IV (15 replicates, purple); Non-proliferative control (20 replicates, blue bell), Squared (20 replicates, azure blue) and Elongated simulations (20 replicates, cornflower Blue). The diagrams of the CVTn path from the iteration 1 until the iteration 100 are represented as a greyscale beginning in black and reducing its darkness with the increase of the iterations; dMWP, Eye, cNT, dWL and dWP have the same replicates and colour codes than Fig.2; circumferences are individual values, circles are the average value obtained from the individual samples from each category.

24  
25



**Figure 4. The rigidity/fluidity of a tissue can be assessed using EpiGraph.** **A)** Initial and final frames of two simulations with different settings: a rigid and a soft tissue. **B)** EpiGraph's 3D plot with Epi-Random, Epi-Hexagons and Epi-Voronoi5 axes, showing the soft simulation tissue in green dots and the rigid simulation as orange dots. Each simulation is represented in 13 frames (see **Material and methods**). **C-D)** Representative examples of segmented images from the third instar *Drosophila* imaginal disc in different conditions: Wild Type (**C**); a solid mutant, *Mbs-RNAi* in (**D**). **E)** Plot comparing the fluidity and organization of the tissues in (**C-D**). CVTn (until diagram 30) displayed in greyscale. Dots in scales of blue represent the WT condition: wing disc 1, aquamarine; wing disc 2, light blue; wing disc 3, dark blue. Represented with points in tones of orange-red, *Mbs-RNAi*: sample 1, salmon colour; sample 2, orange; sample 3, red. **F-G)** Boxplot of the intercalation rate (**F**), which is the number of T1 transitions per cell per hour, and the fourfold vertices found per cell (**G**) (note that no fivefold vertices, or beyond, was found on any sample). Boxes stand for the data inside the upper and lower quartiles, while the vertical dashed lines (whiskers) indicate the variability outside them. Mean (dashed line) and median (thick line) of each condition is represented inside each box. The actual values are also presented as circles (and the outlier values as circumferences) with its correspondent colour. In addition, statistical significance, by means of a Kolmogorov-Smirnov test, is shown in the top of both panels (**F**: '\*\*\*'  $p < 0.01$ , **G**: '\*\*'  $p < 0.05$ ). Each condition has 3 samples (different colour tone), and the numeric tag represents its frame. In WT have been taken 6 frames per sample in periods of 6 minutes. In the case of *Mbs-RNAi* were taken 3 frames per sample with time lapse of 15 minutes. All the conditions have been tracked for 30 minutes (see **Material and methods**).

28

29



**A**

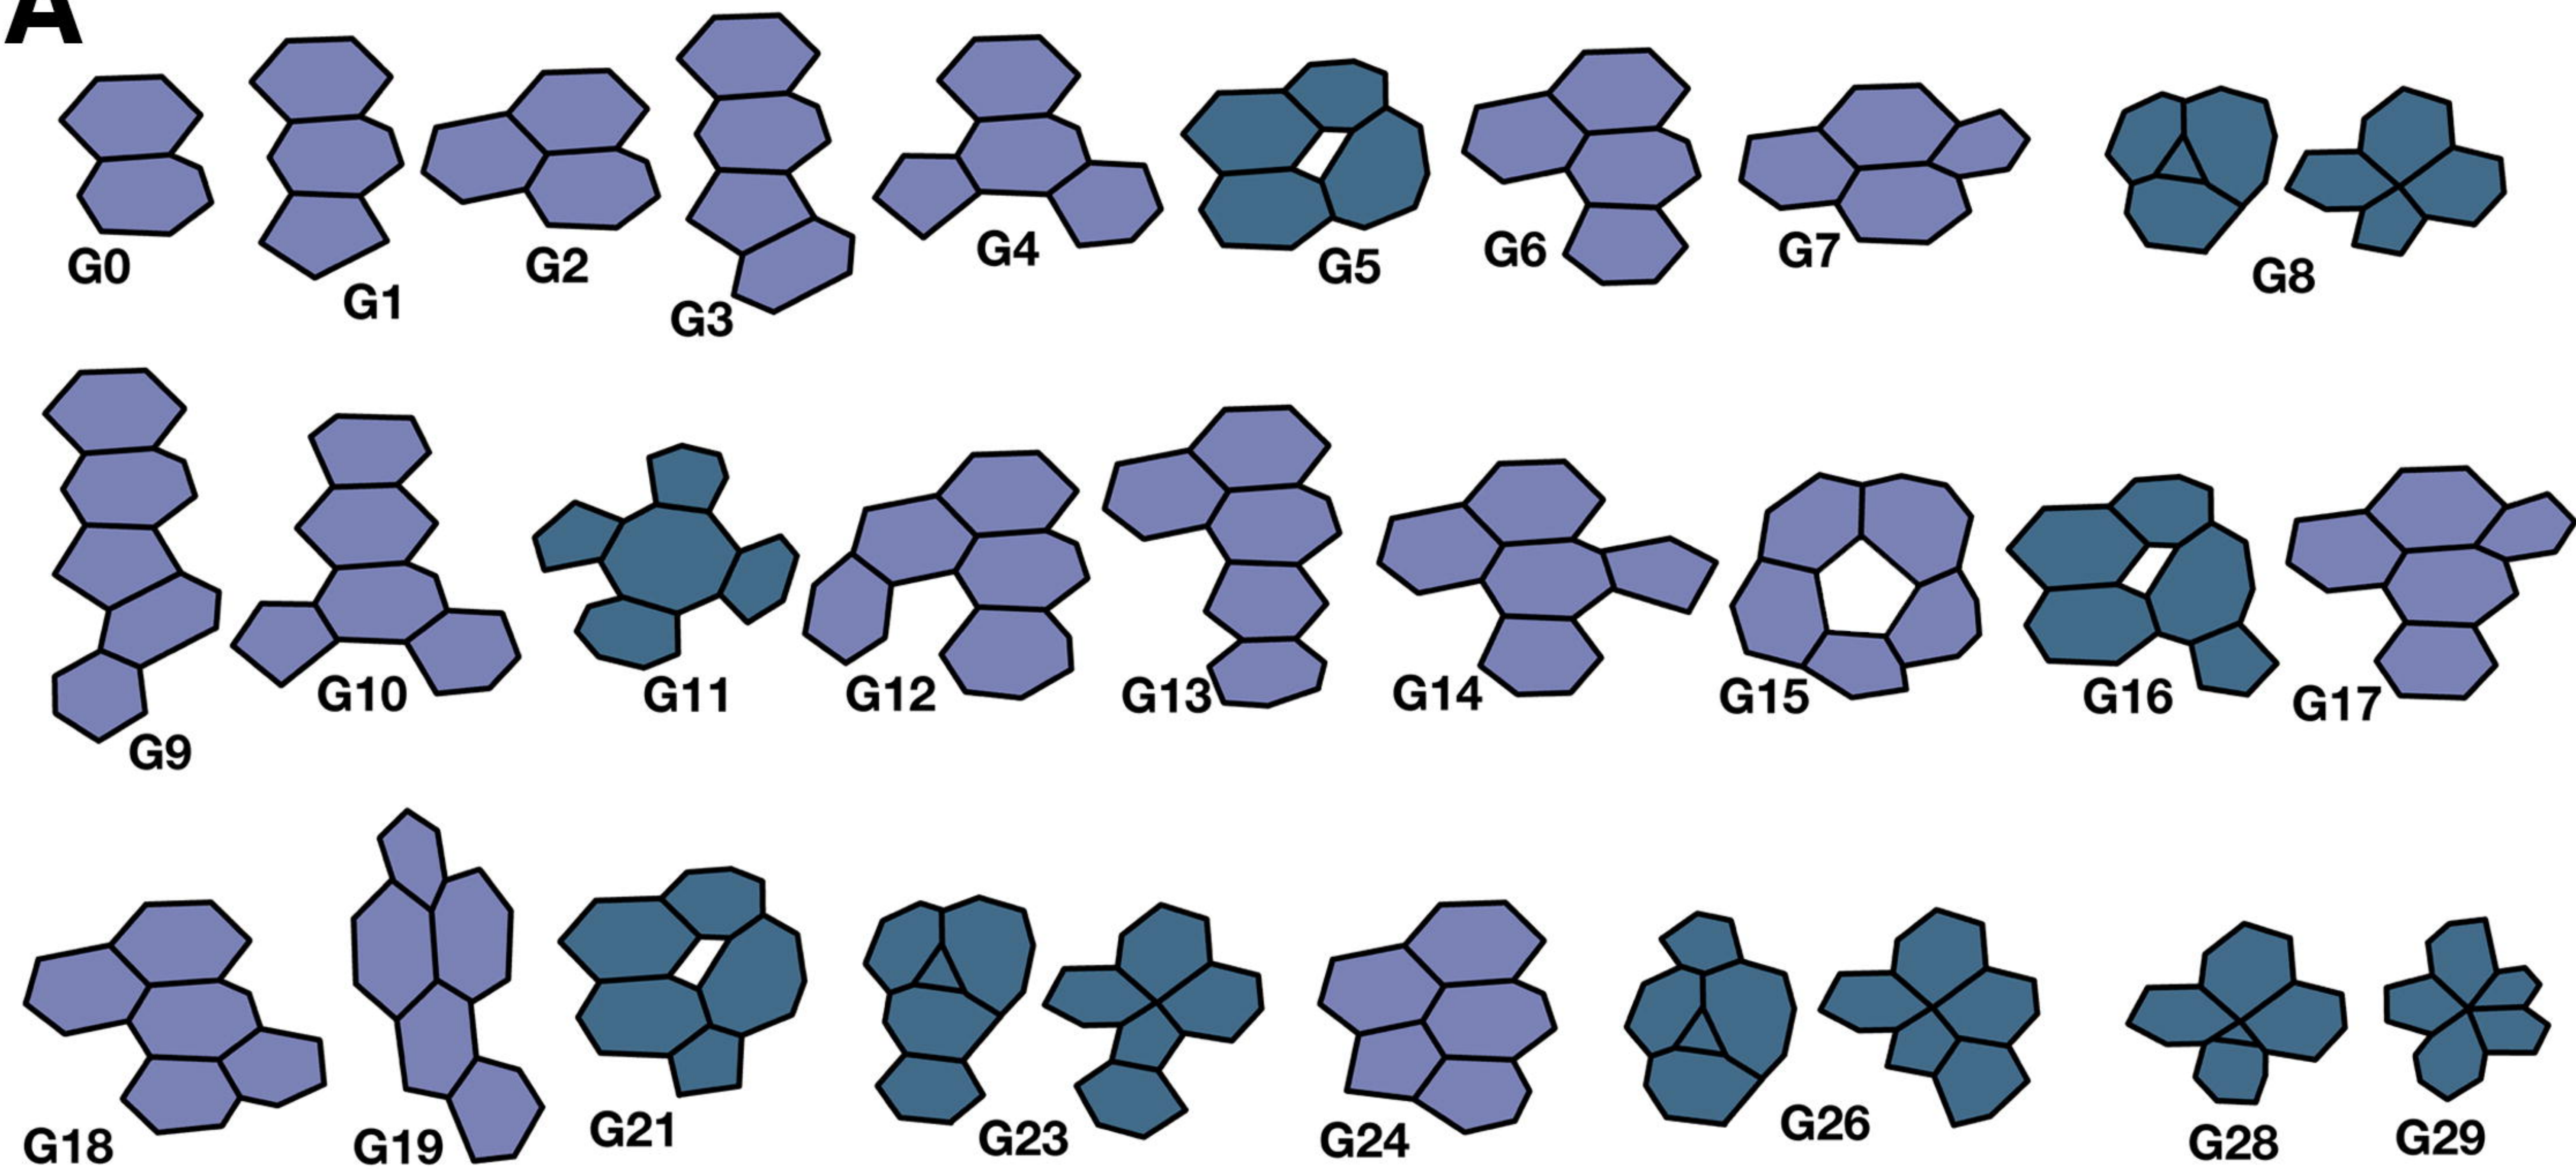

**B**

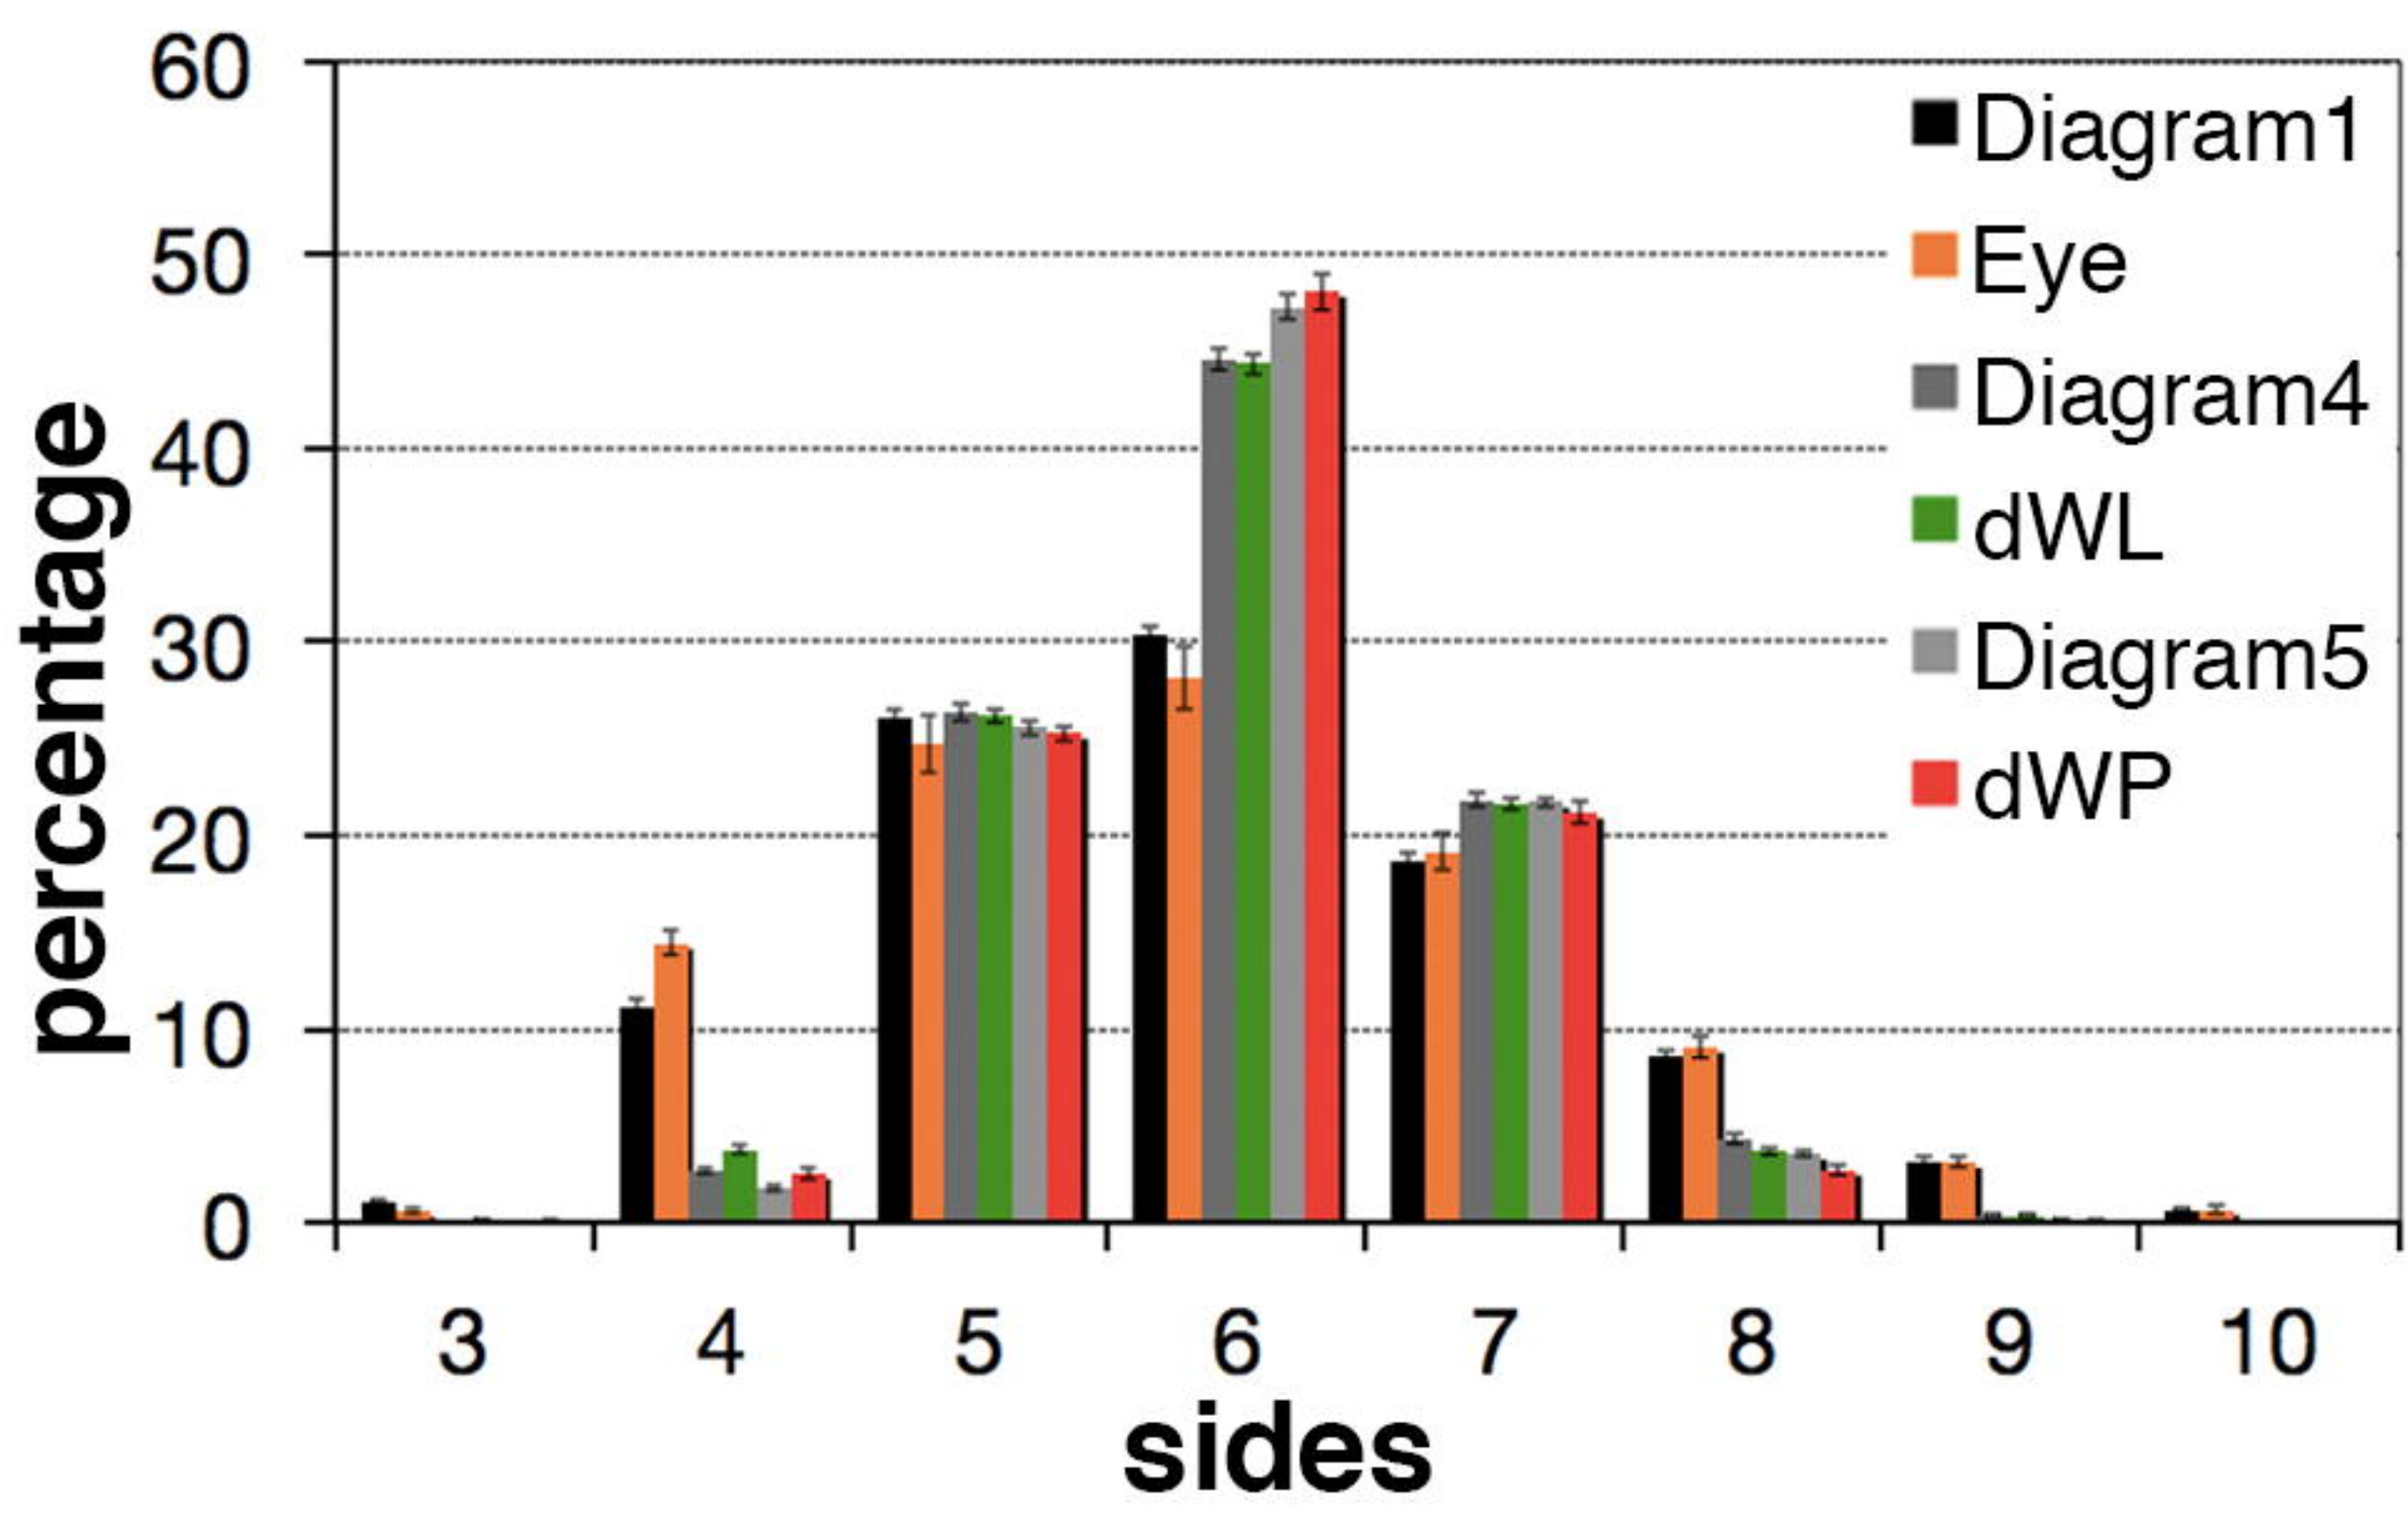

**C**

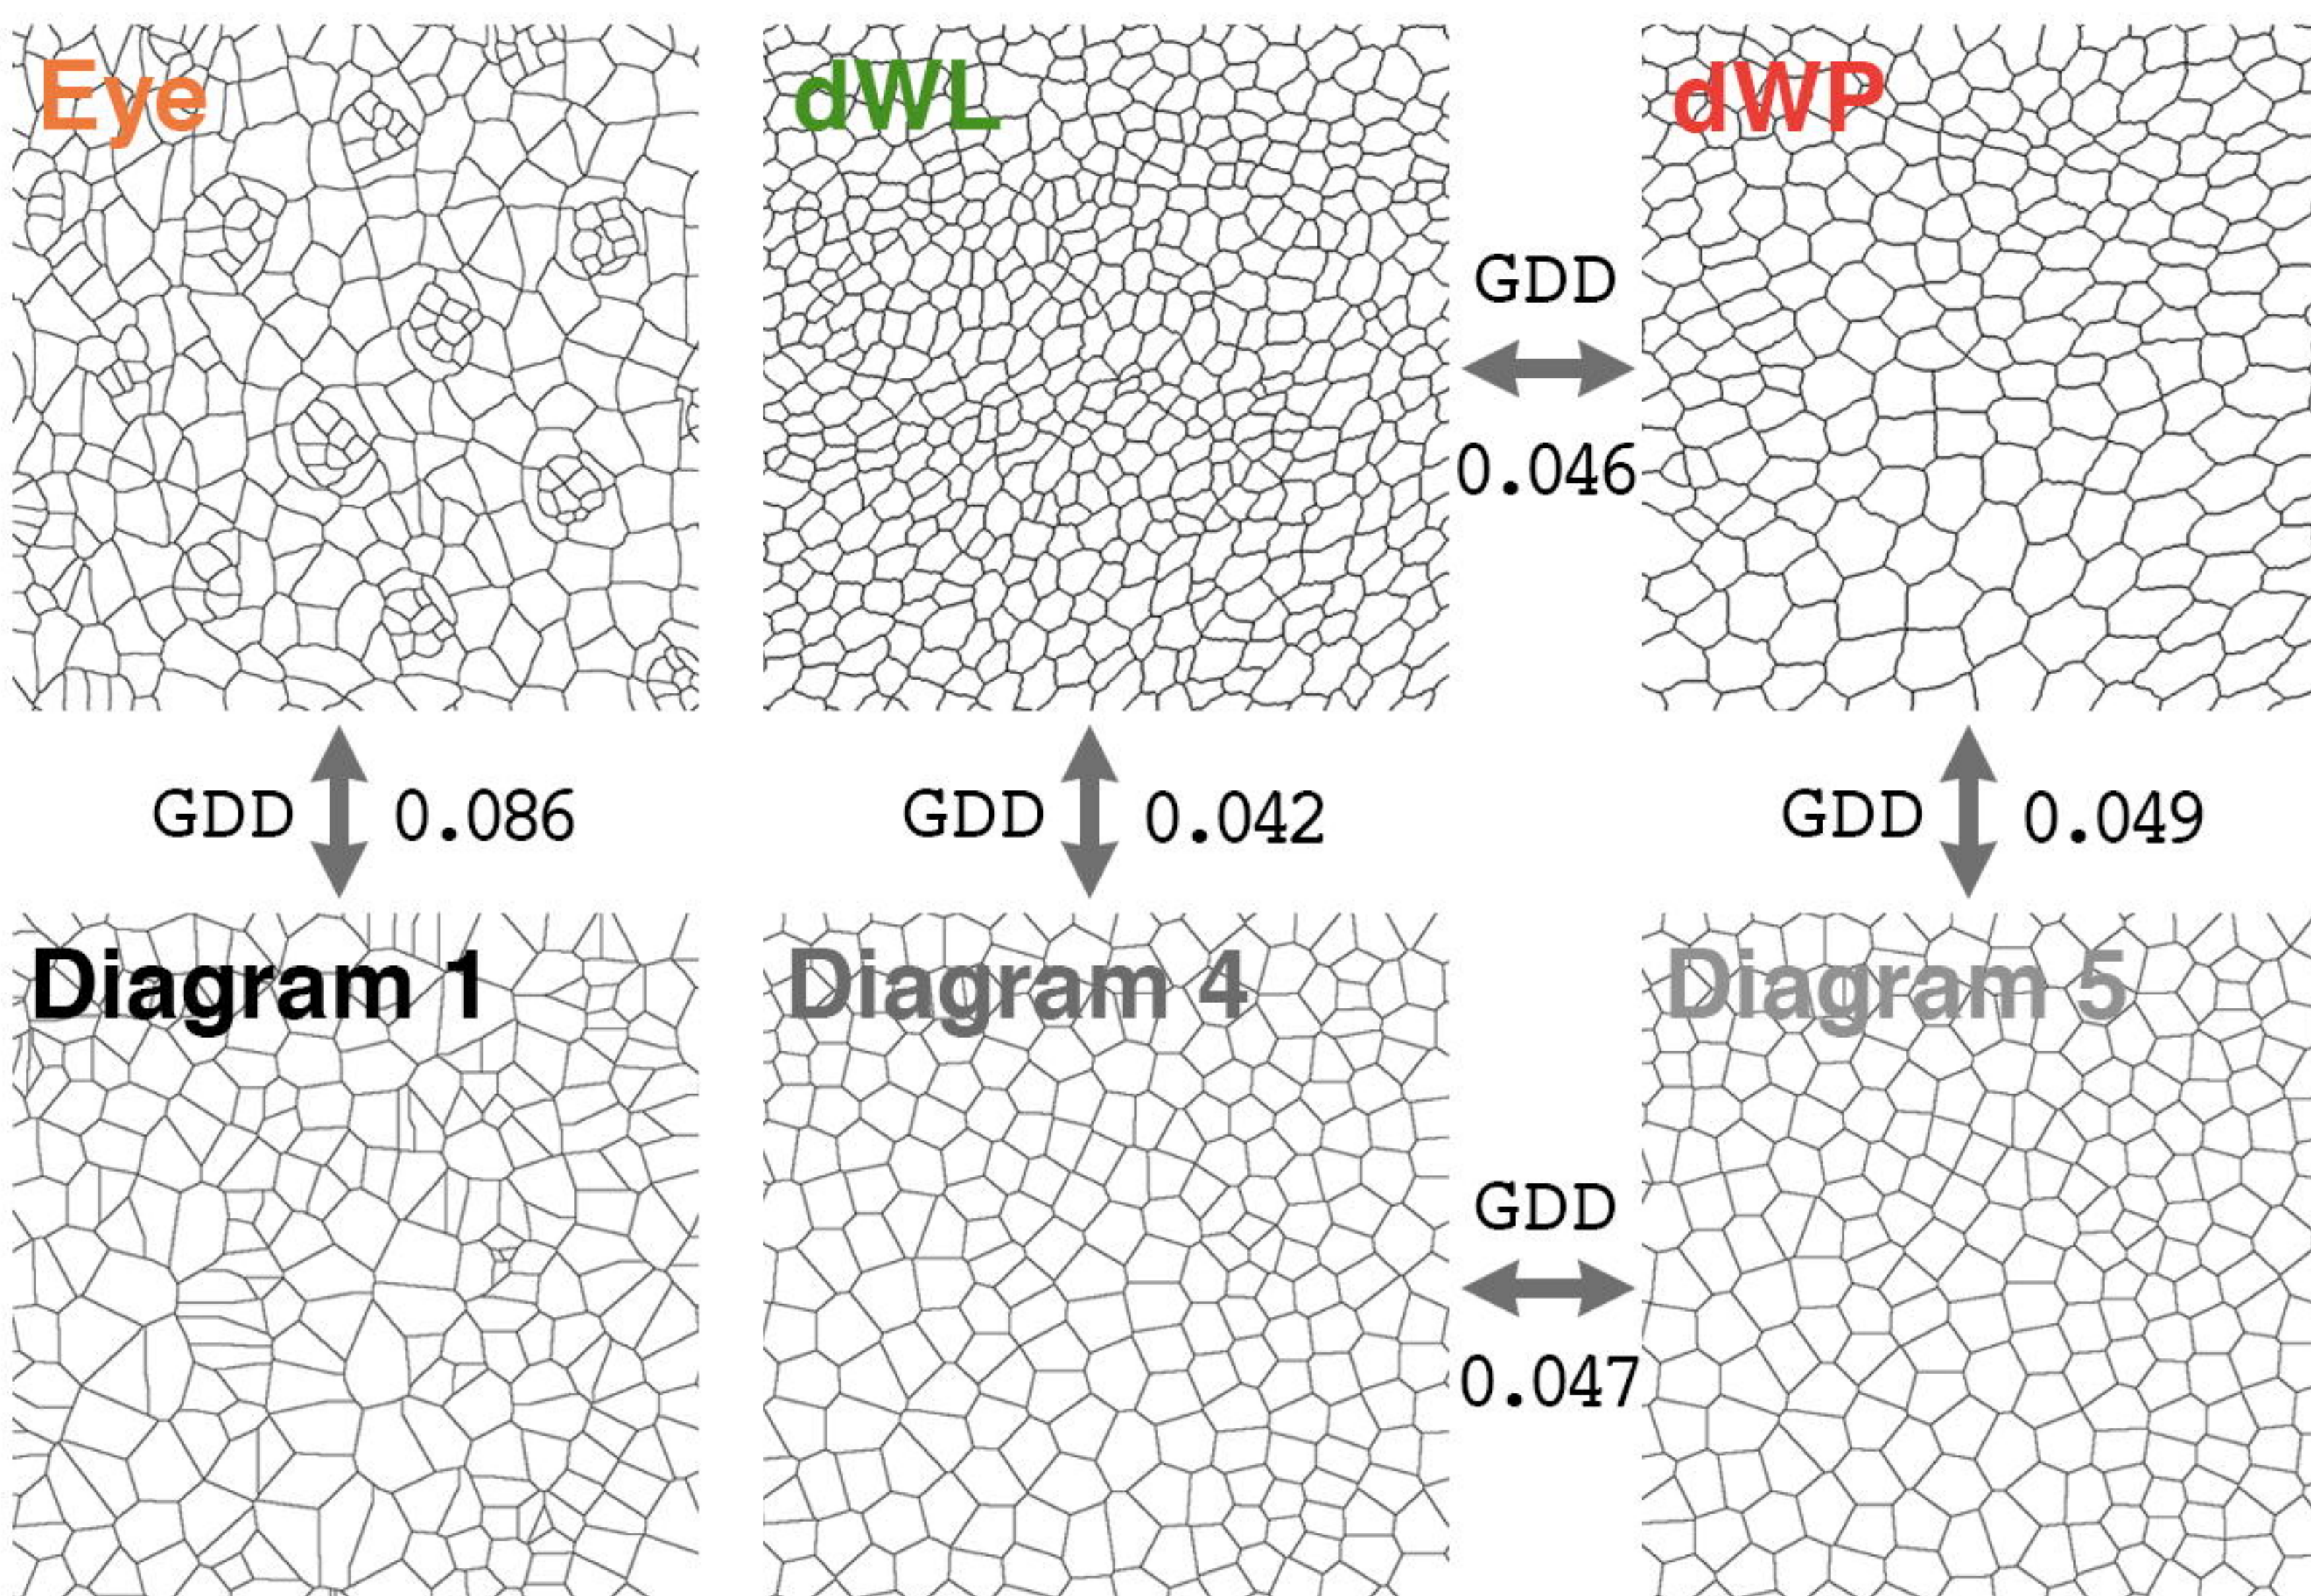



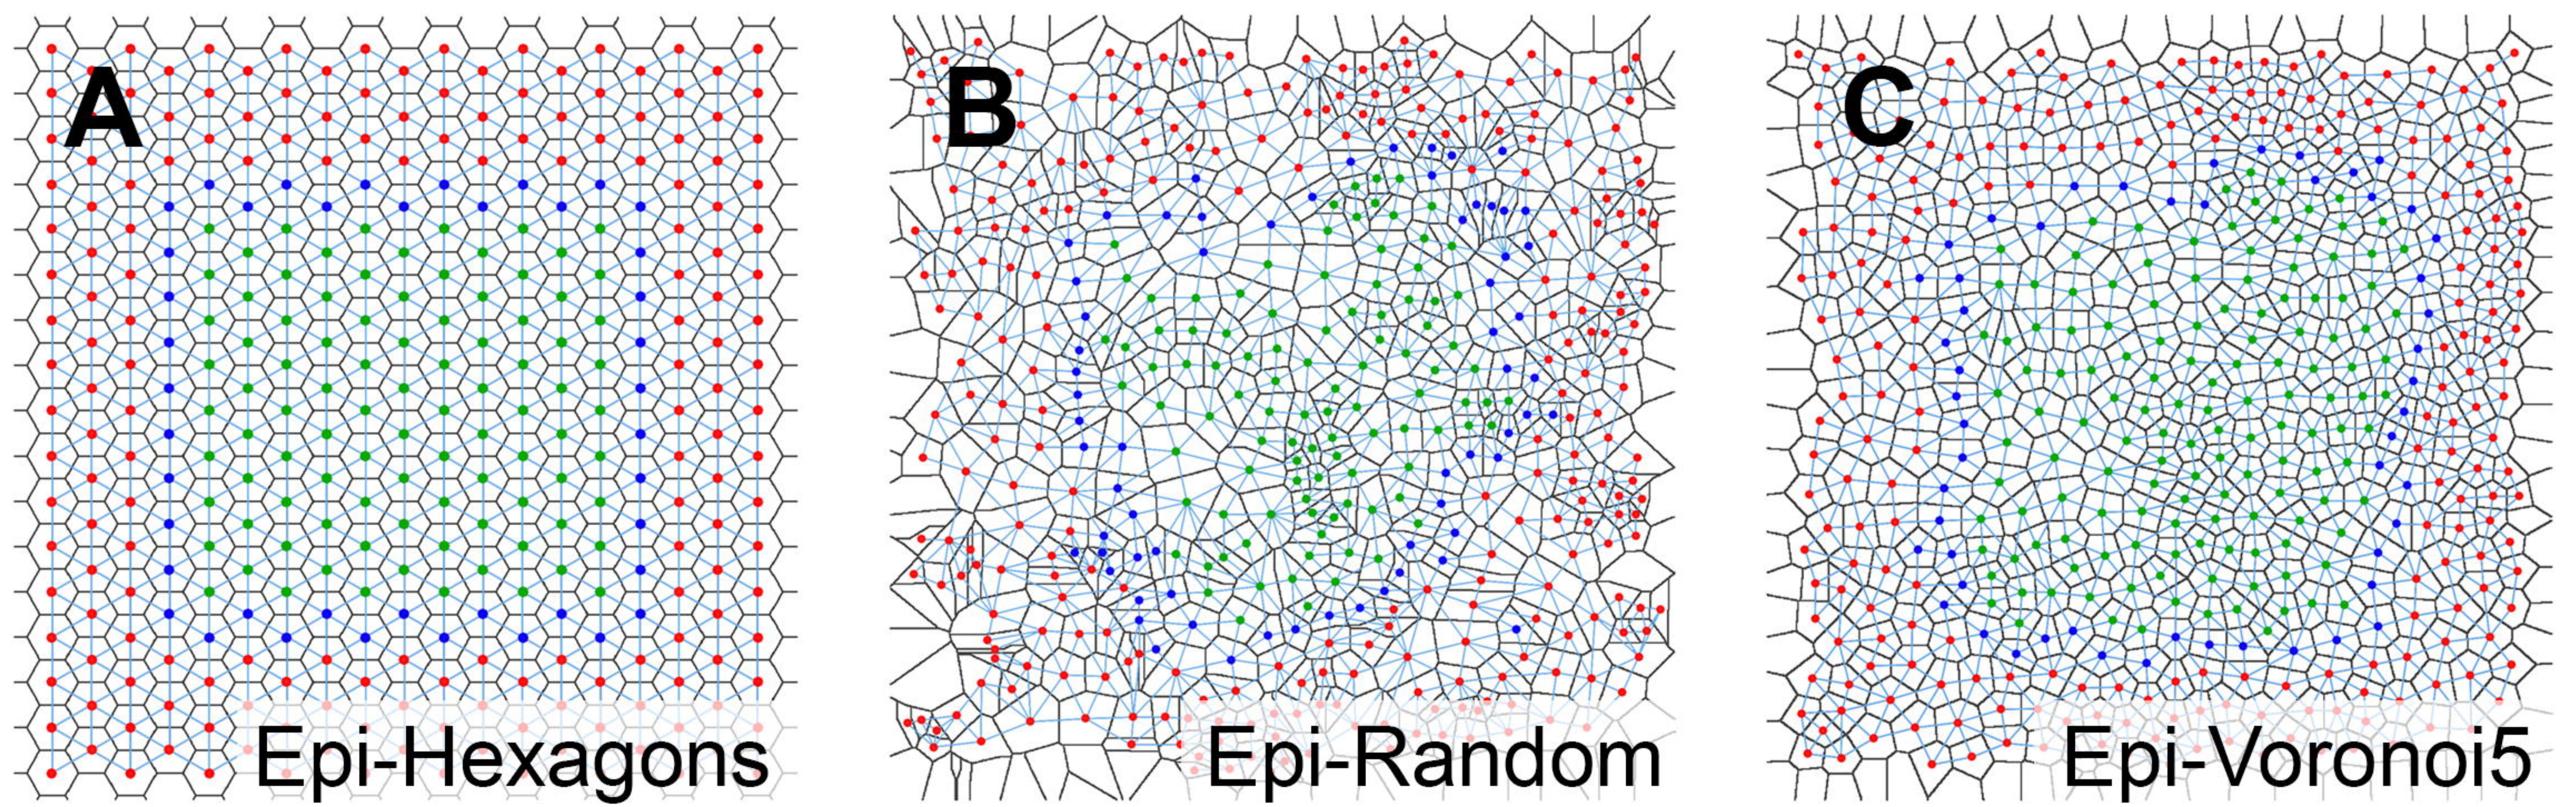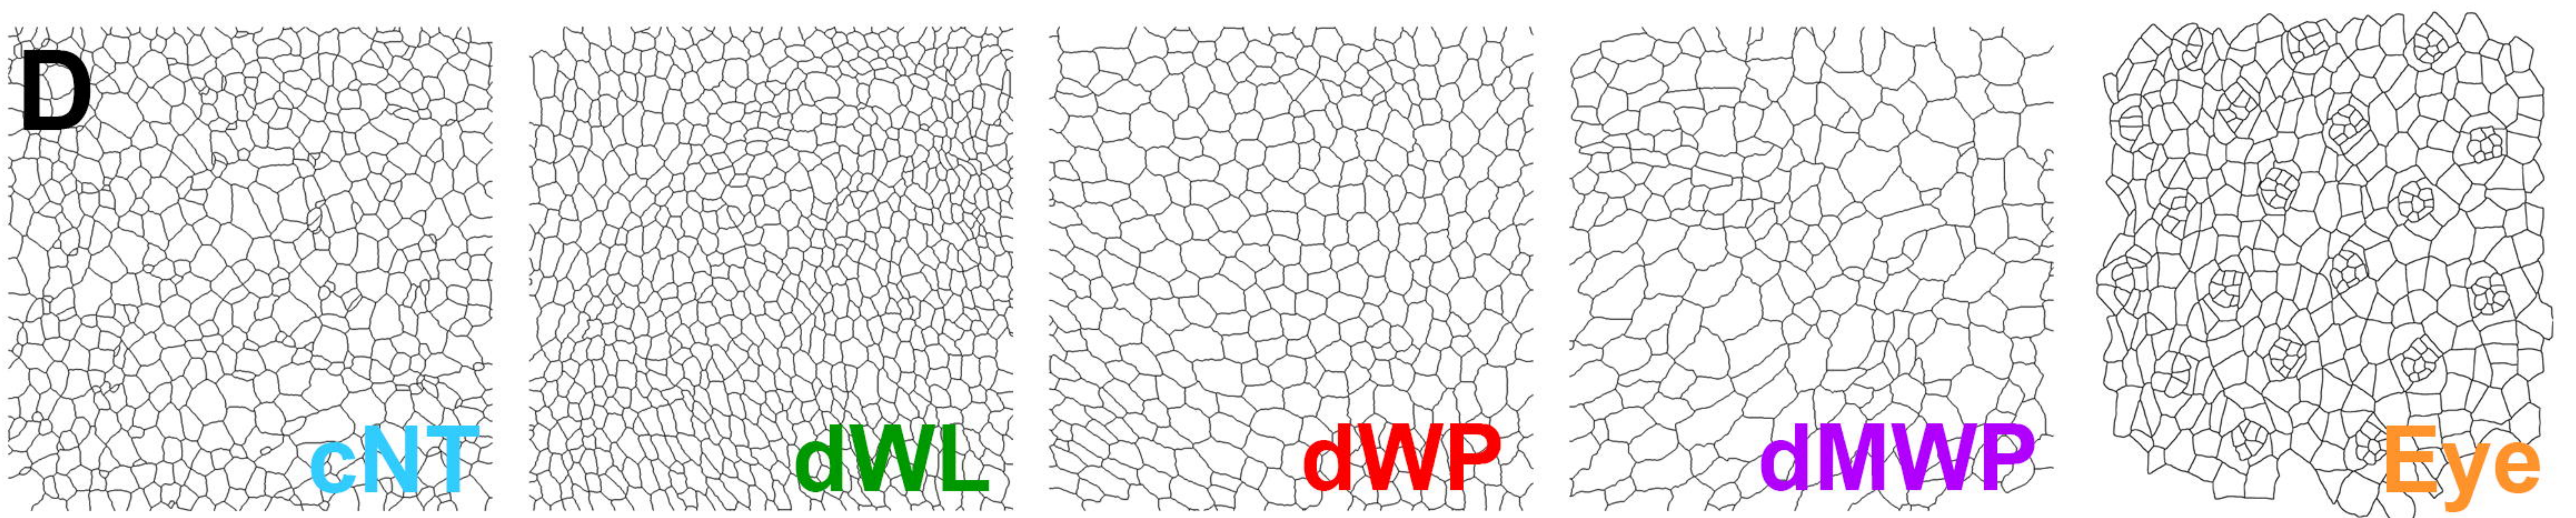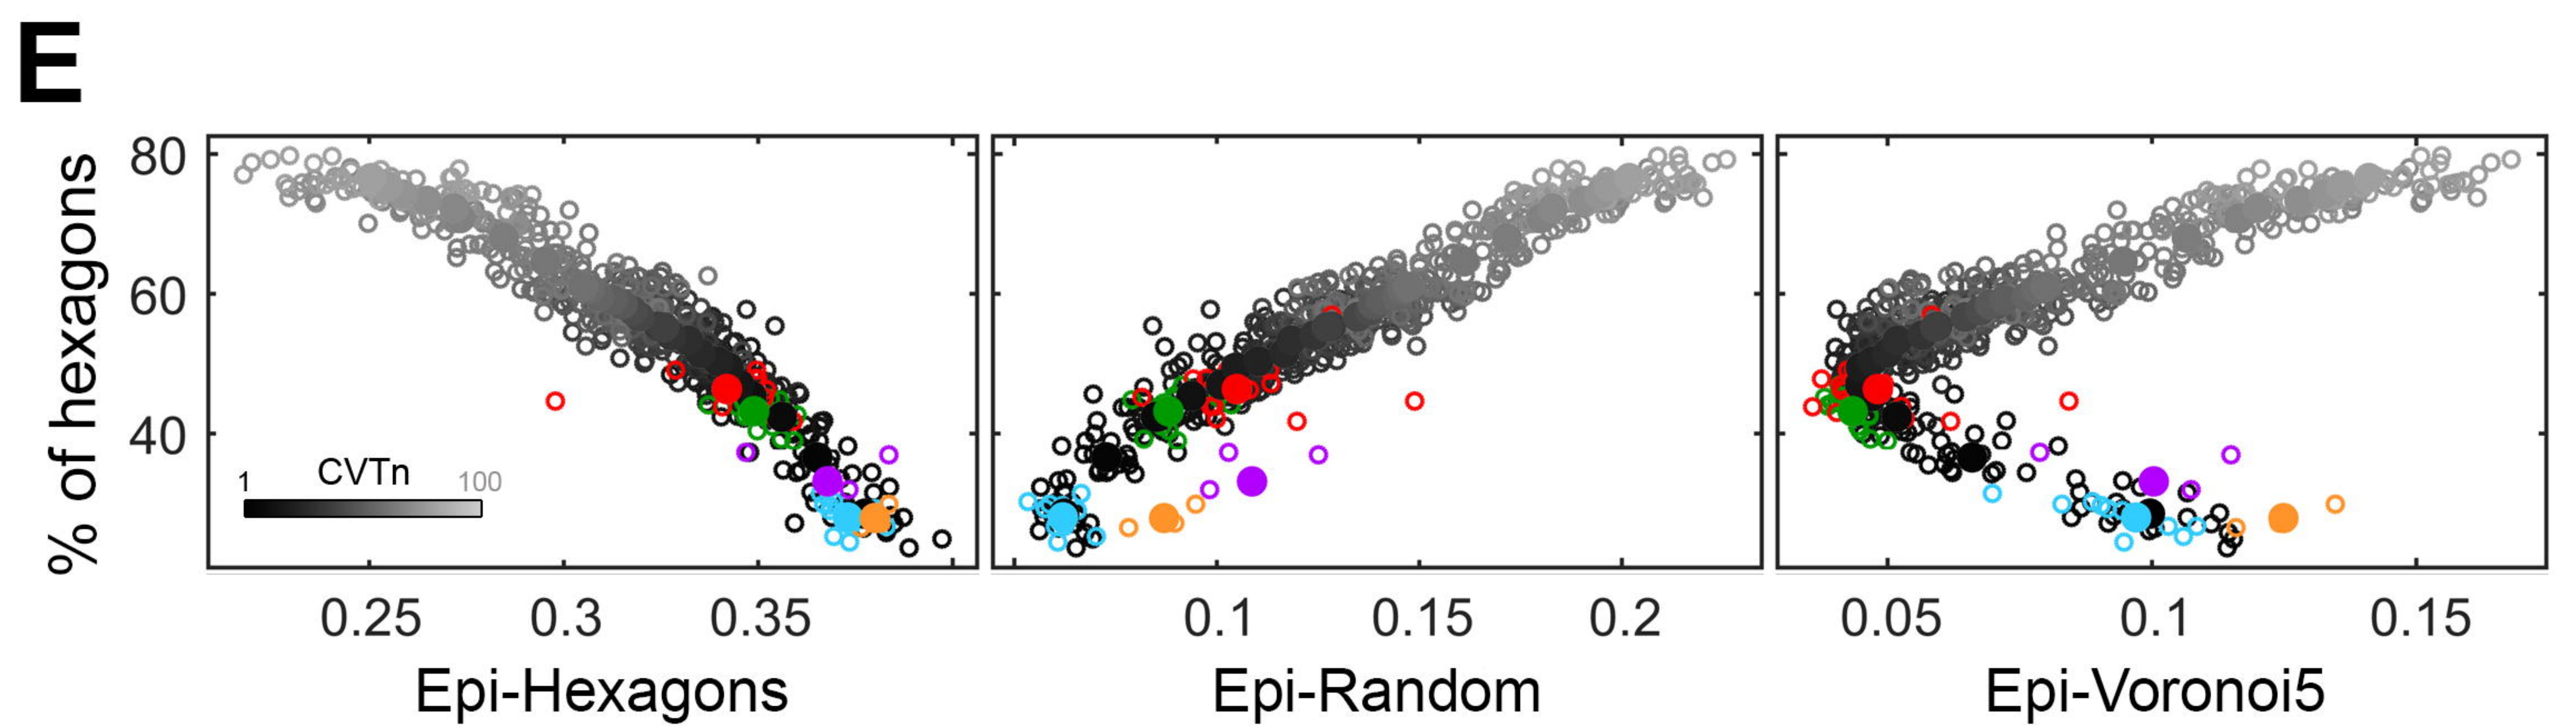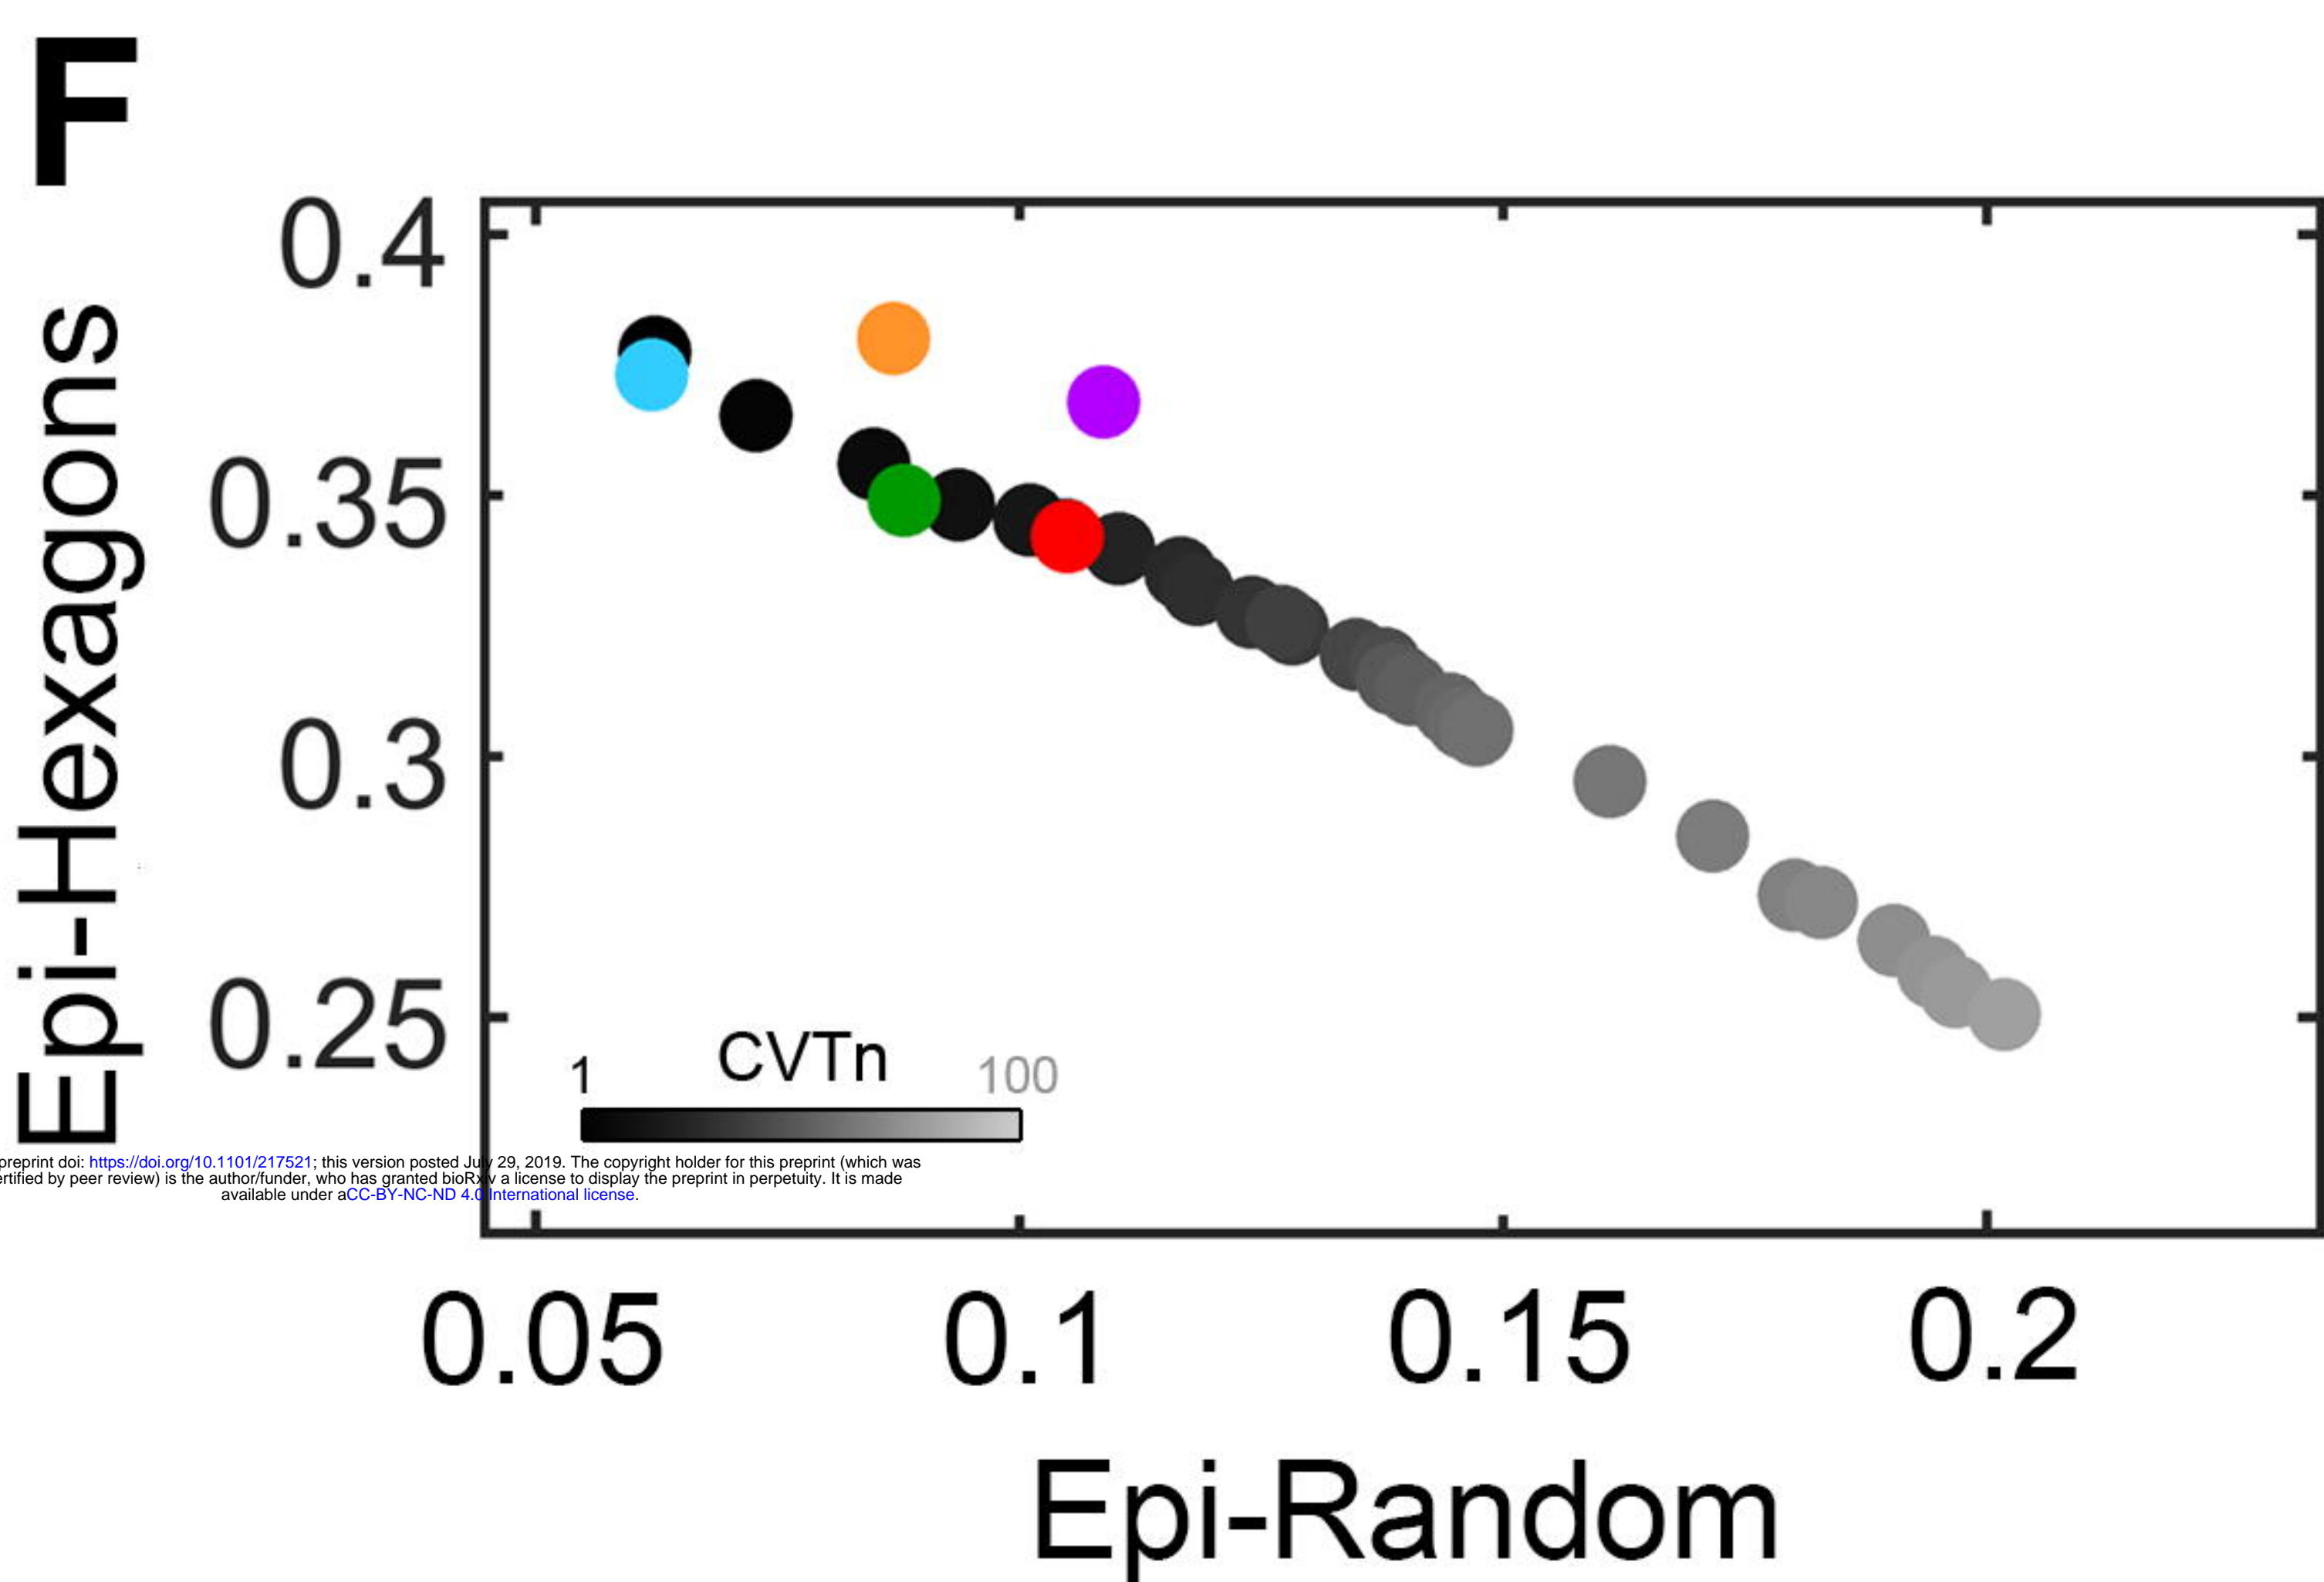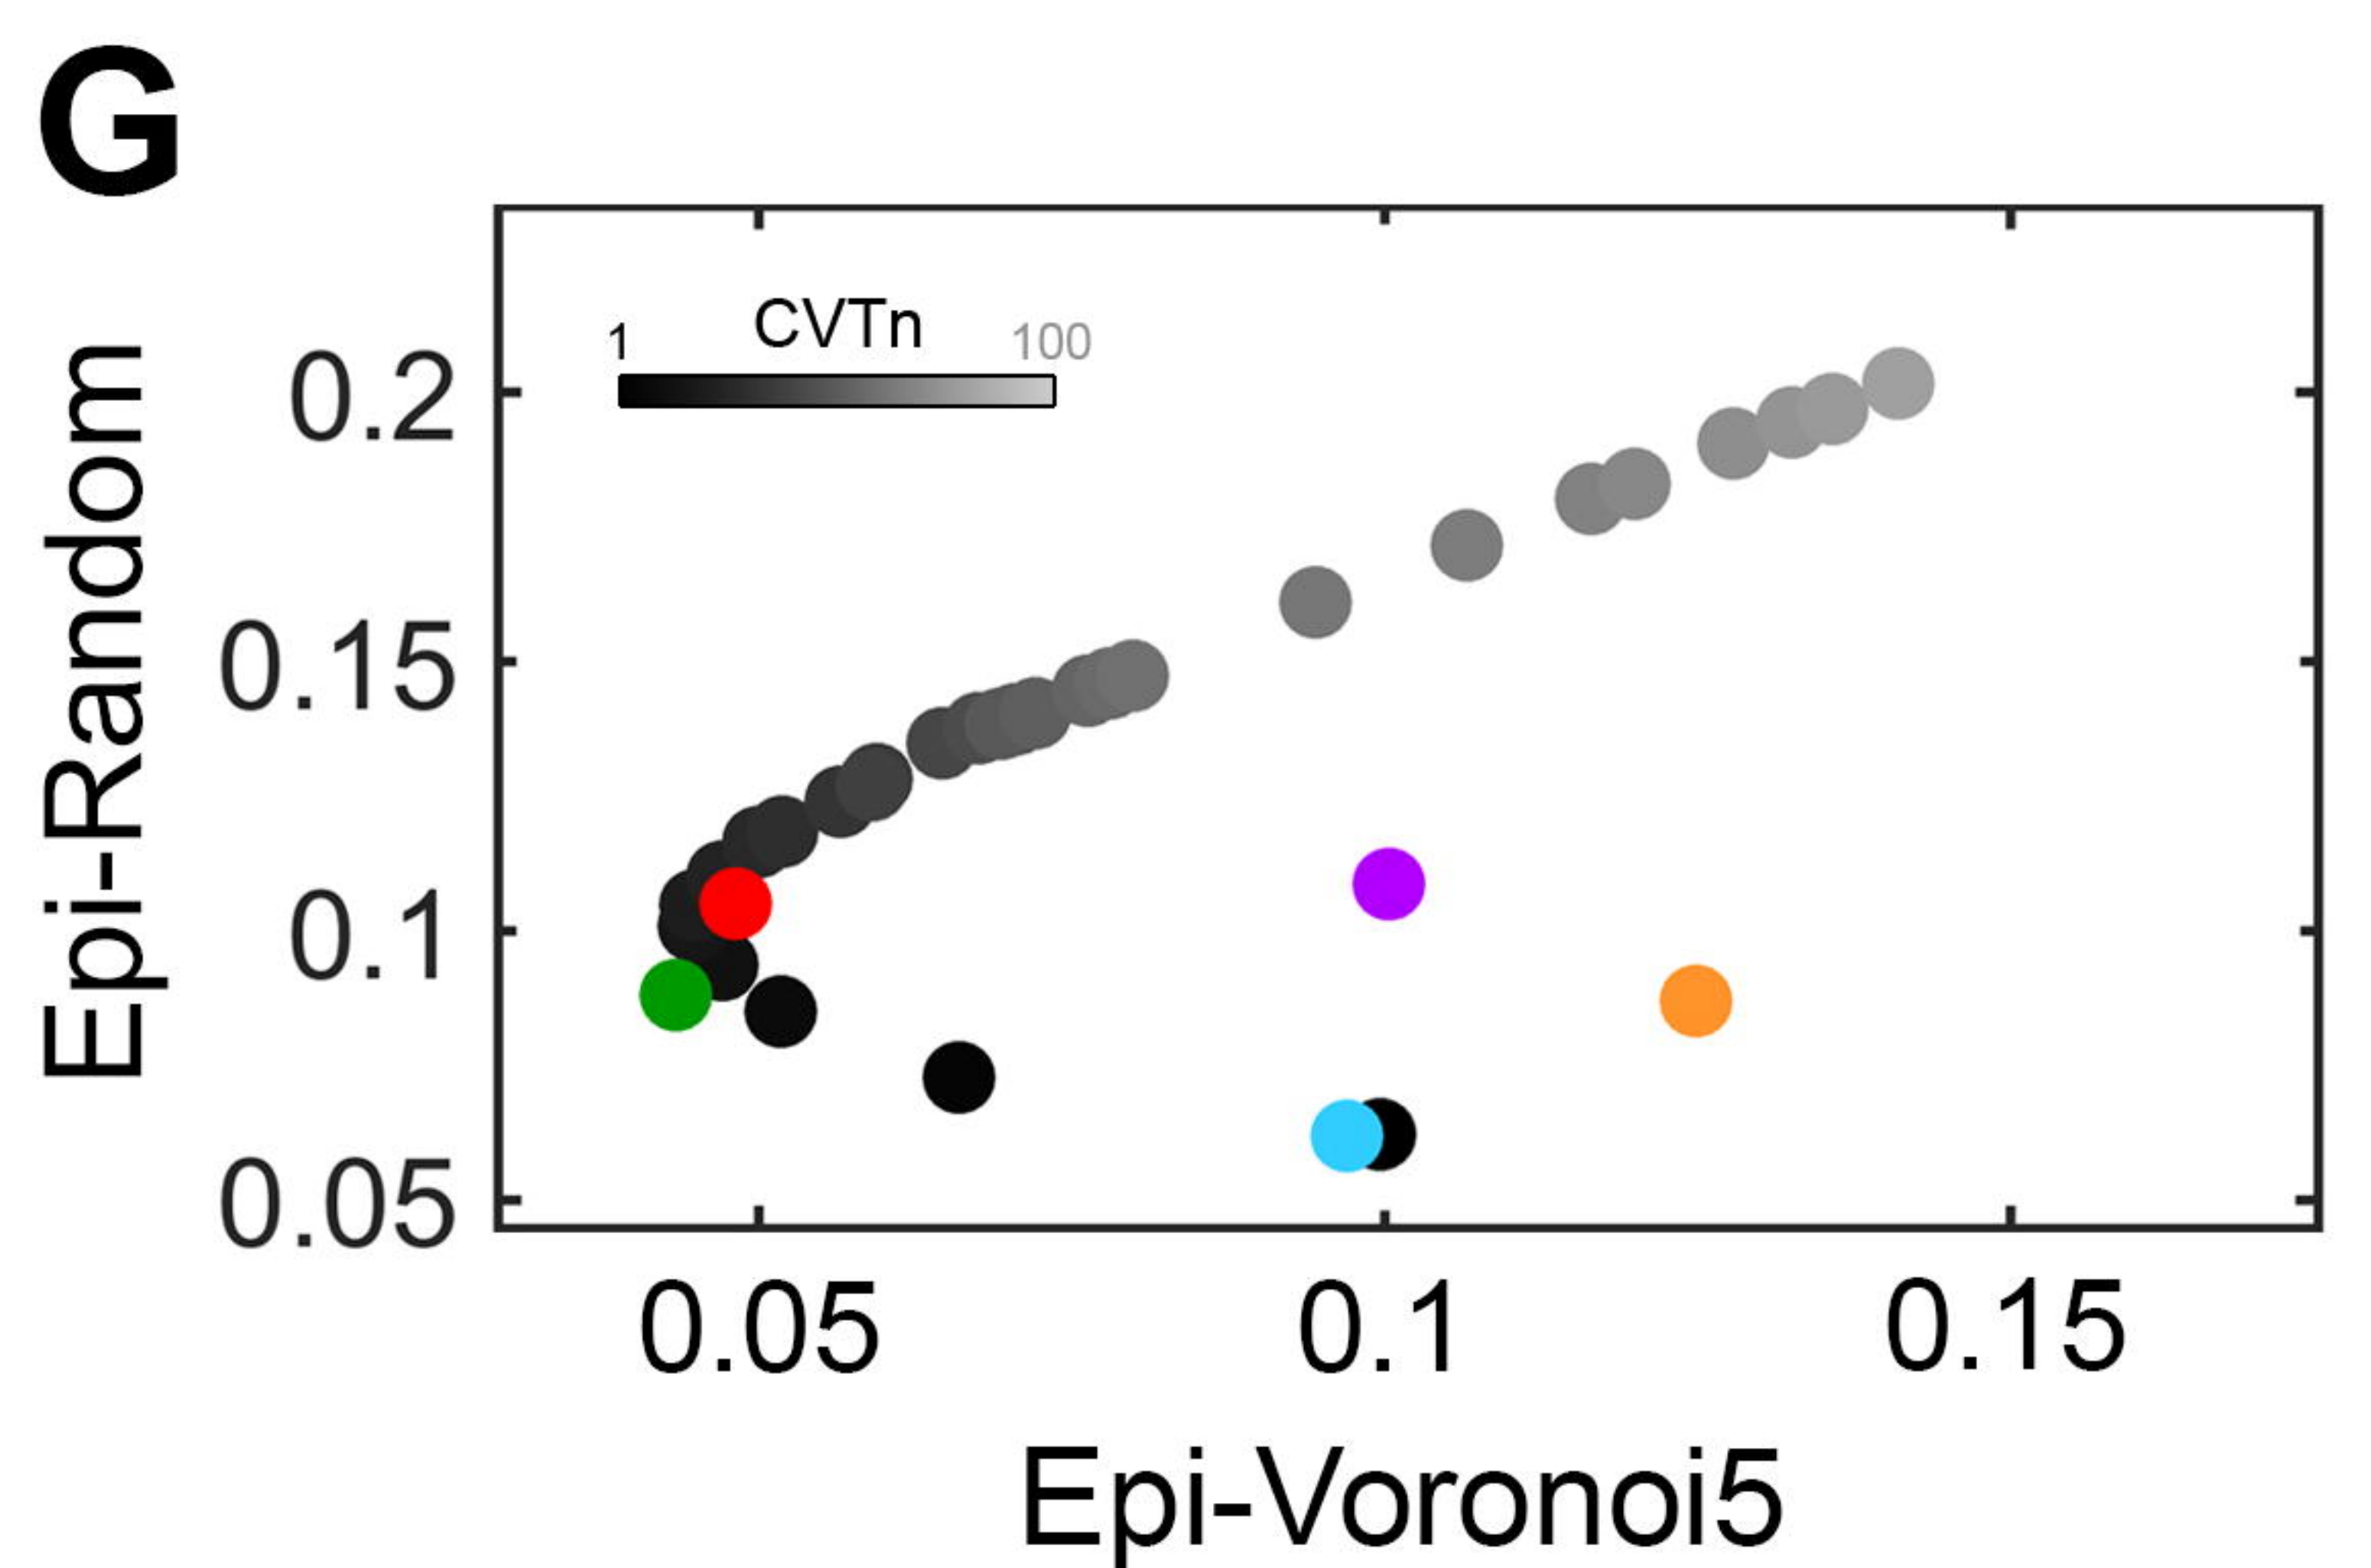



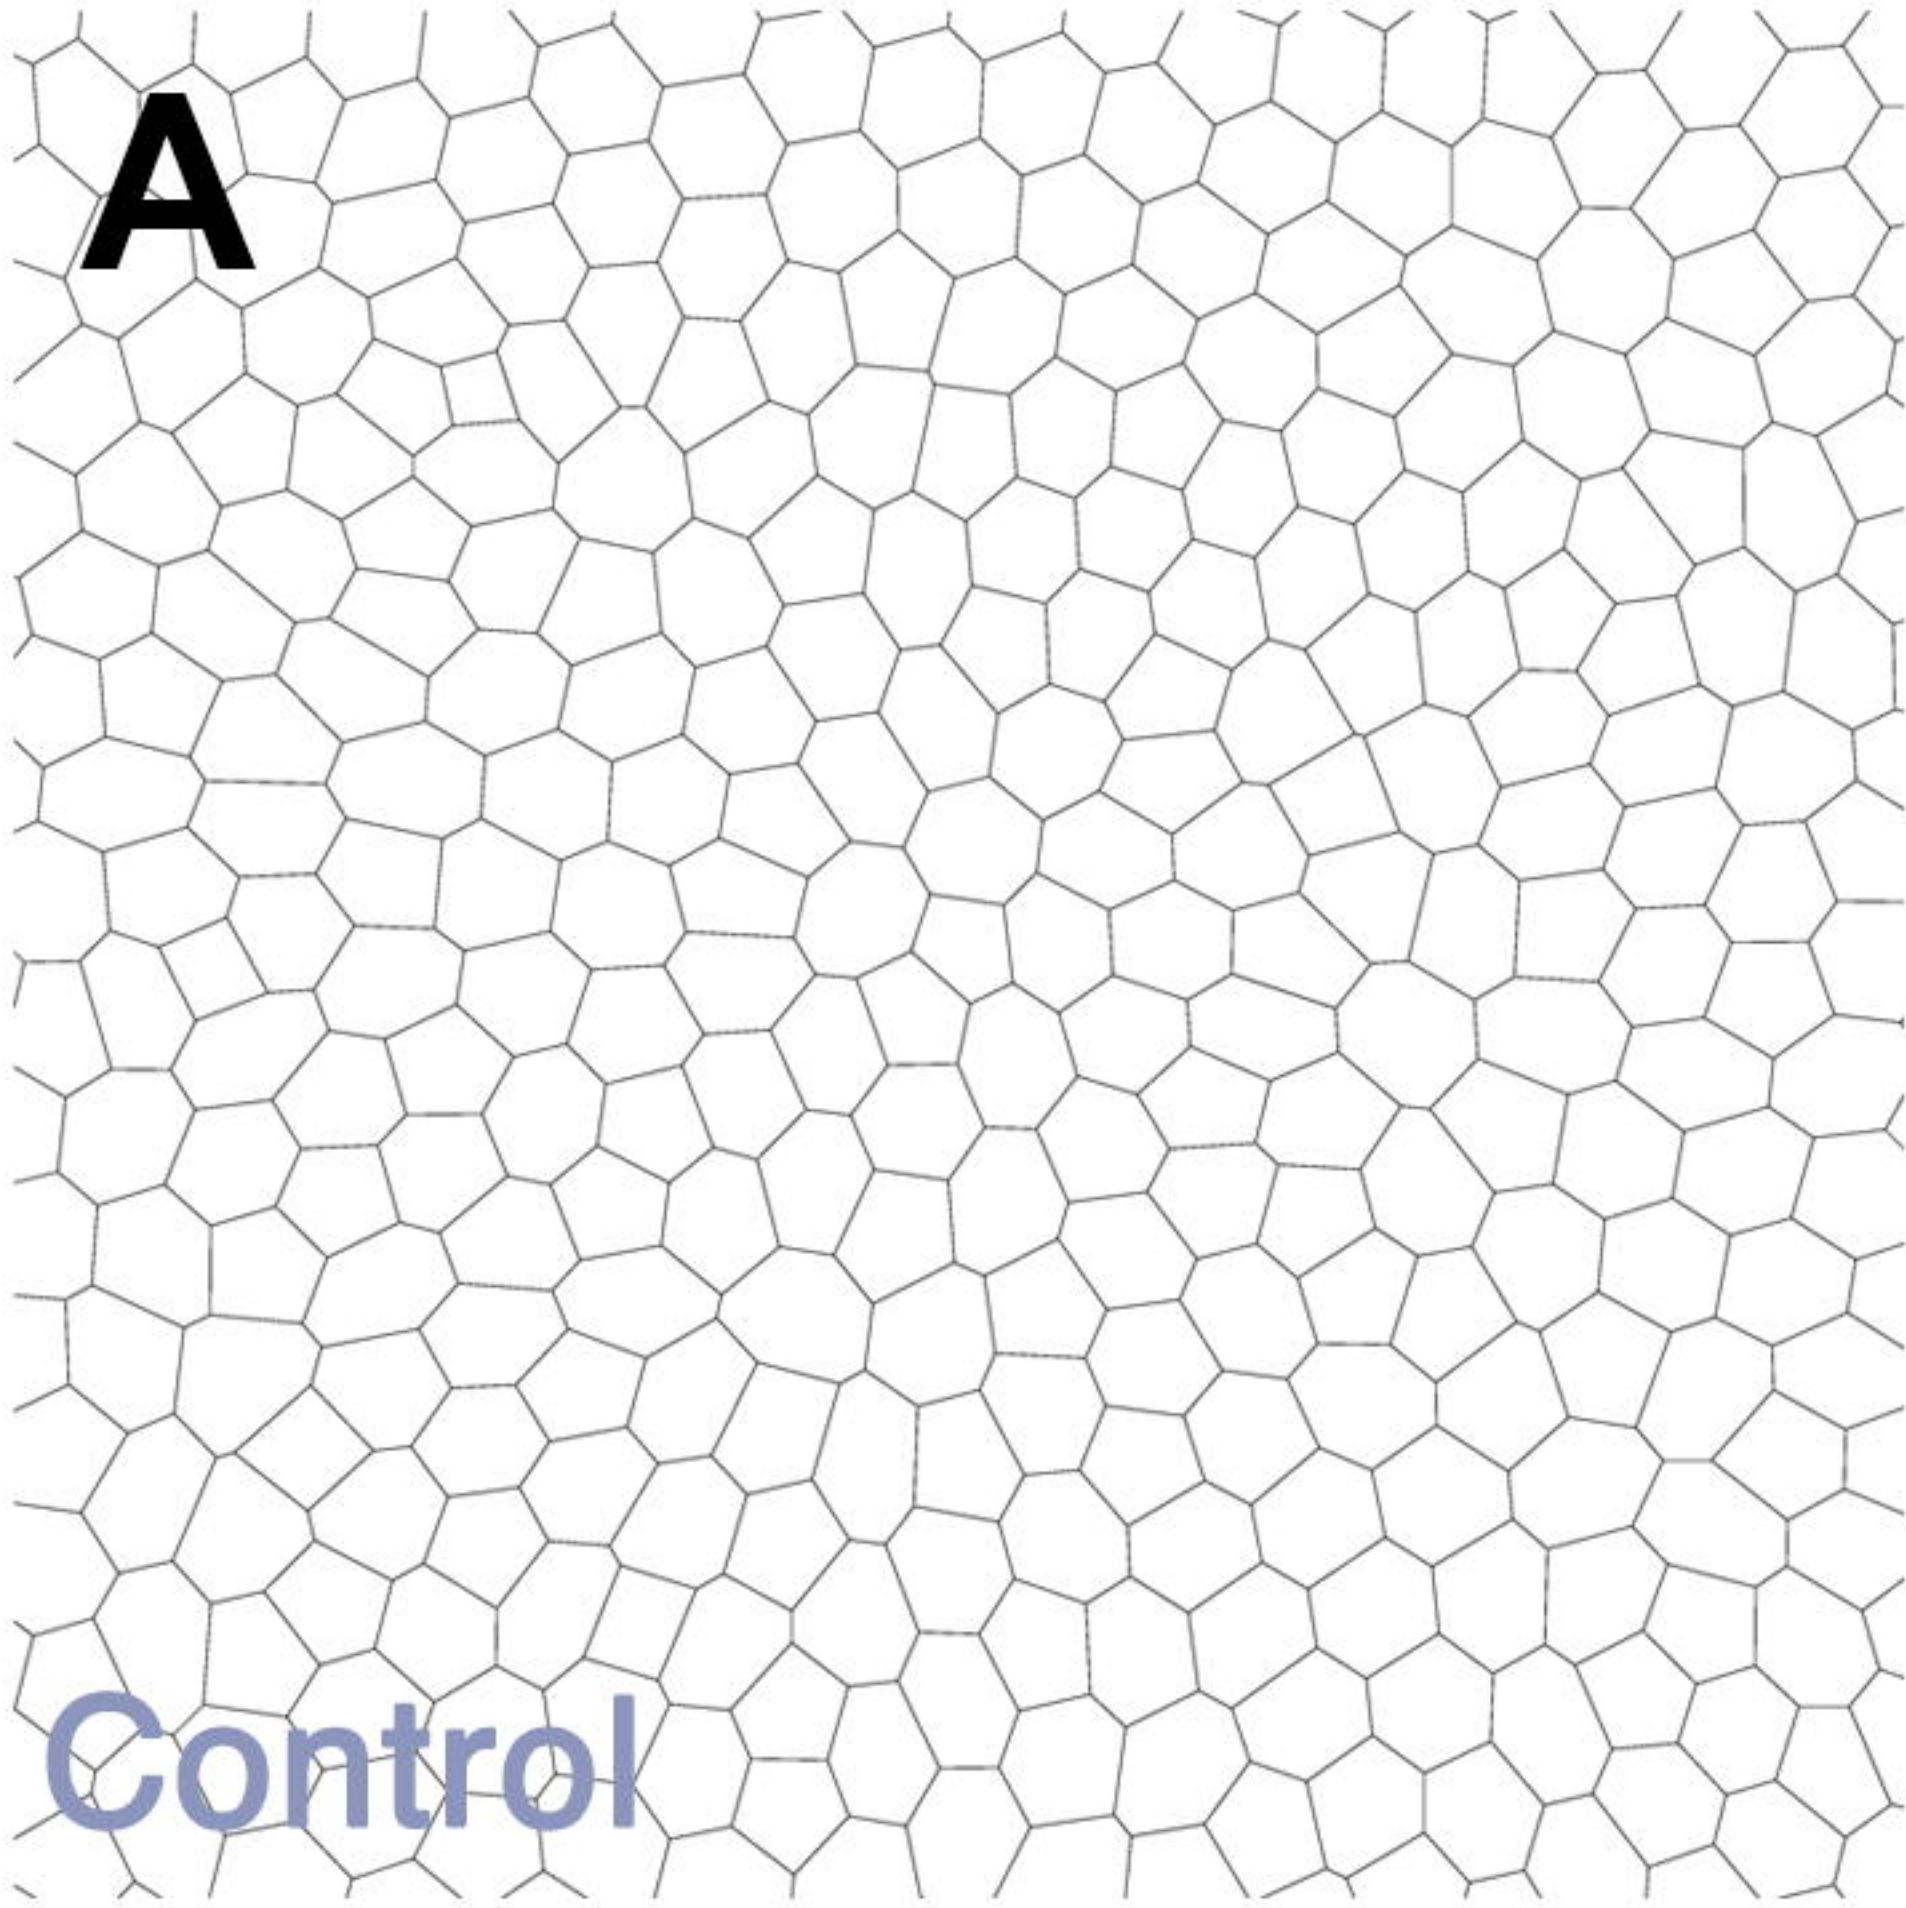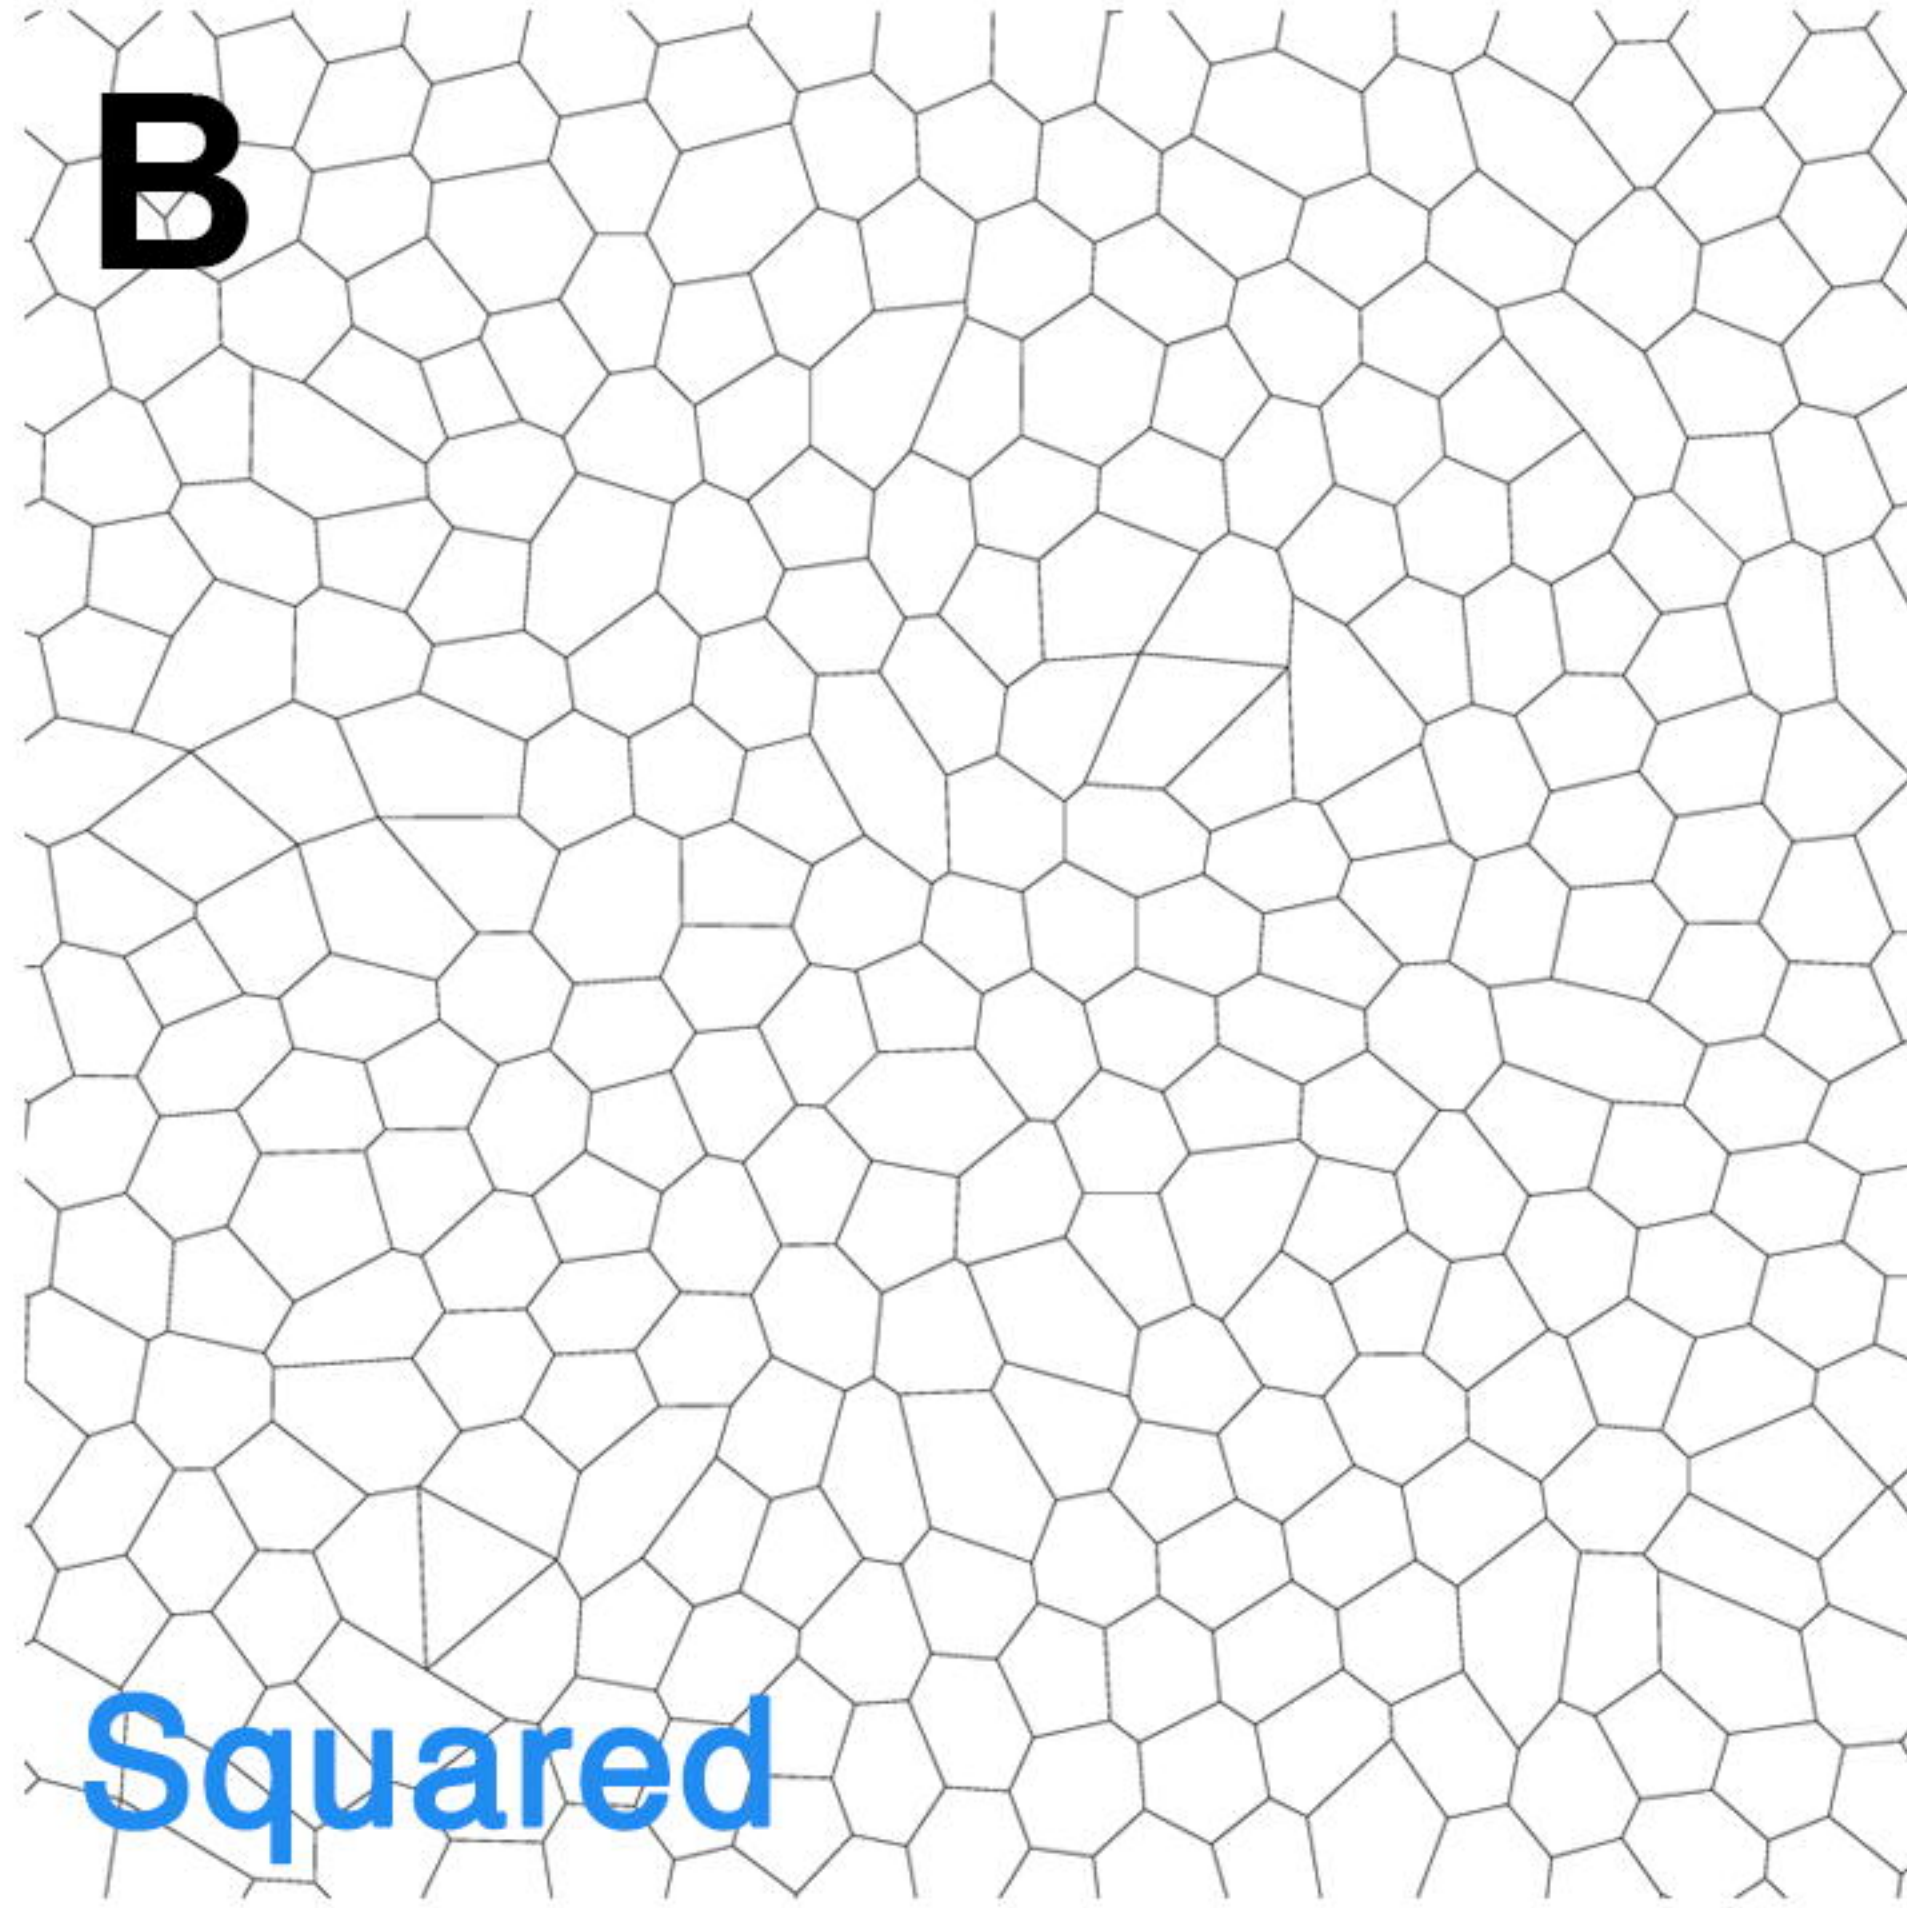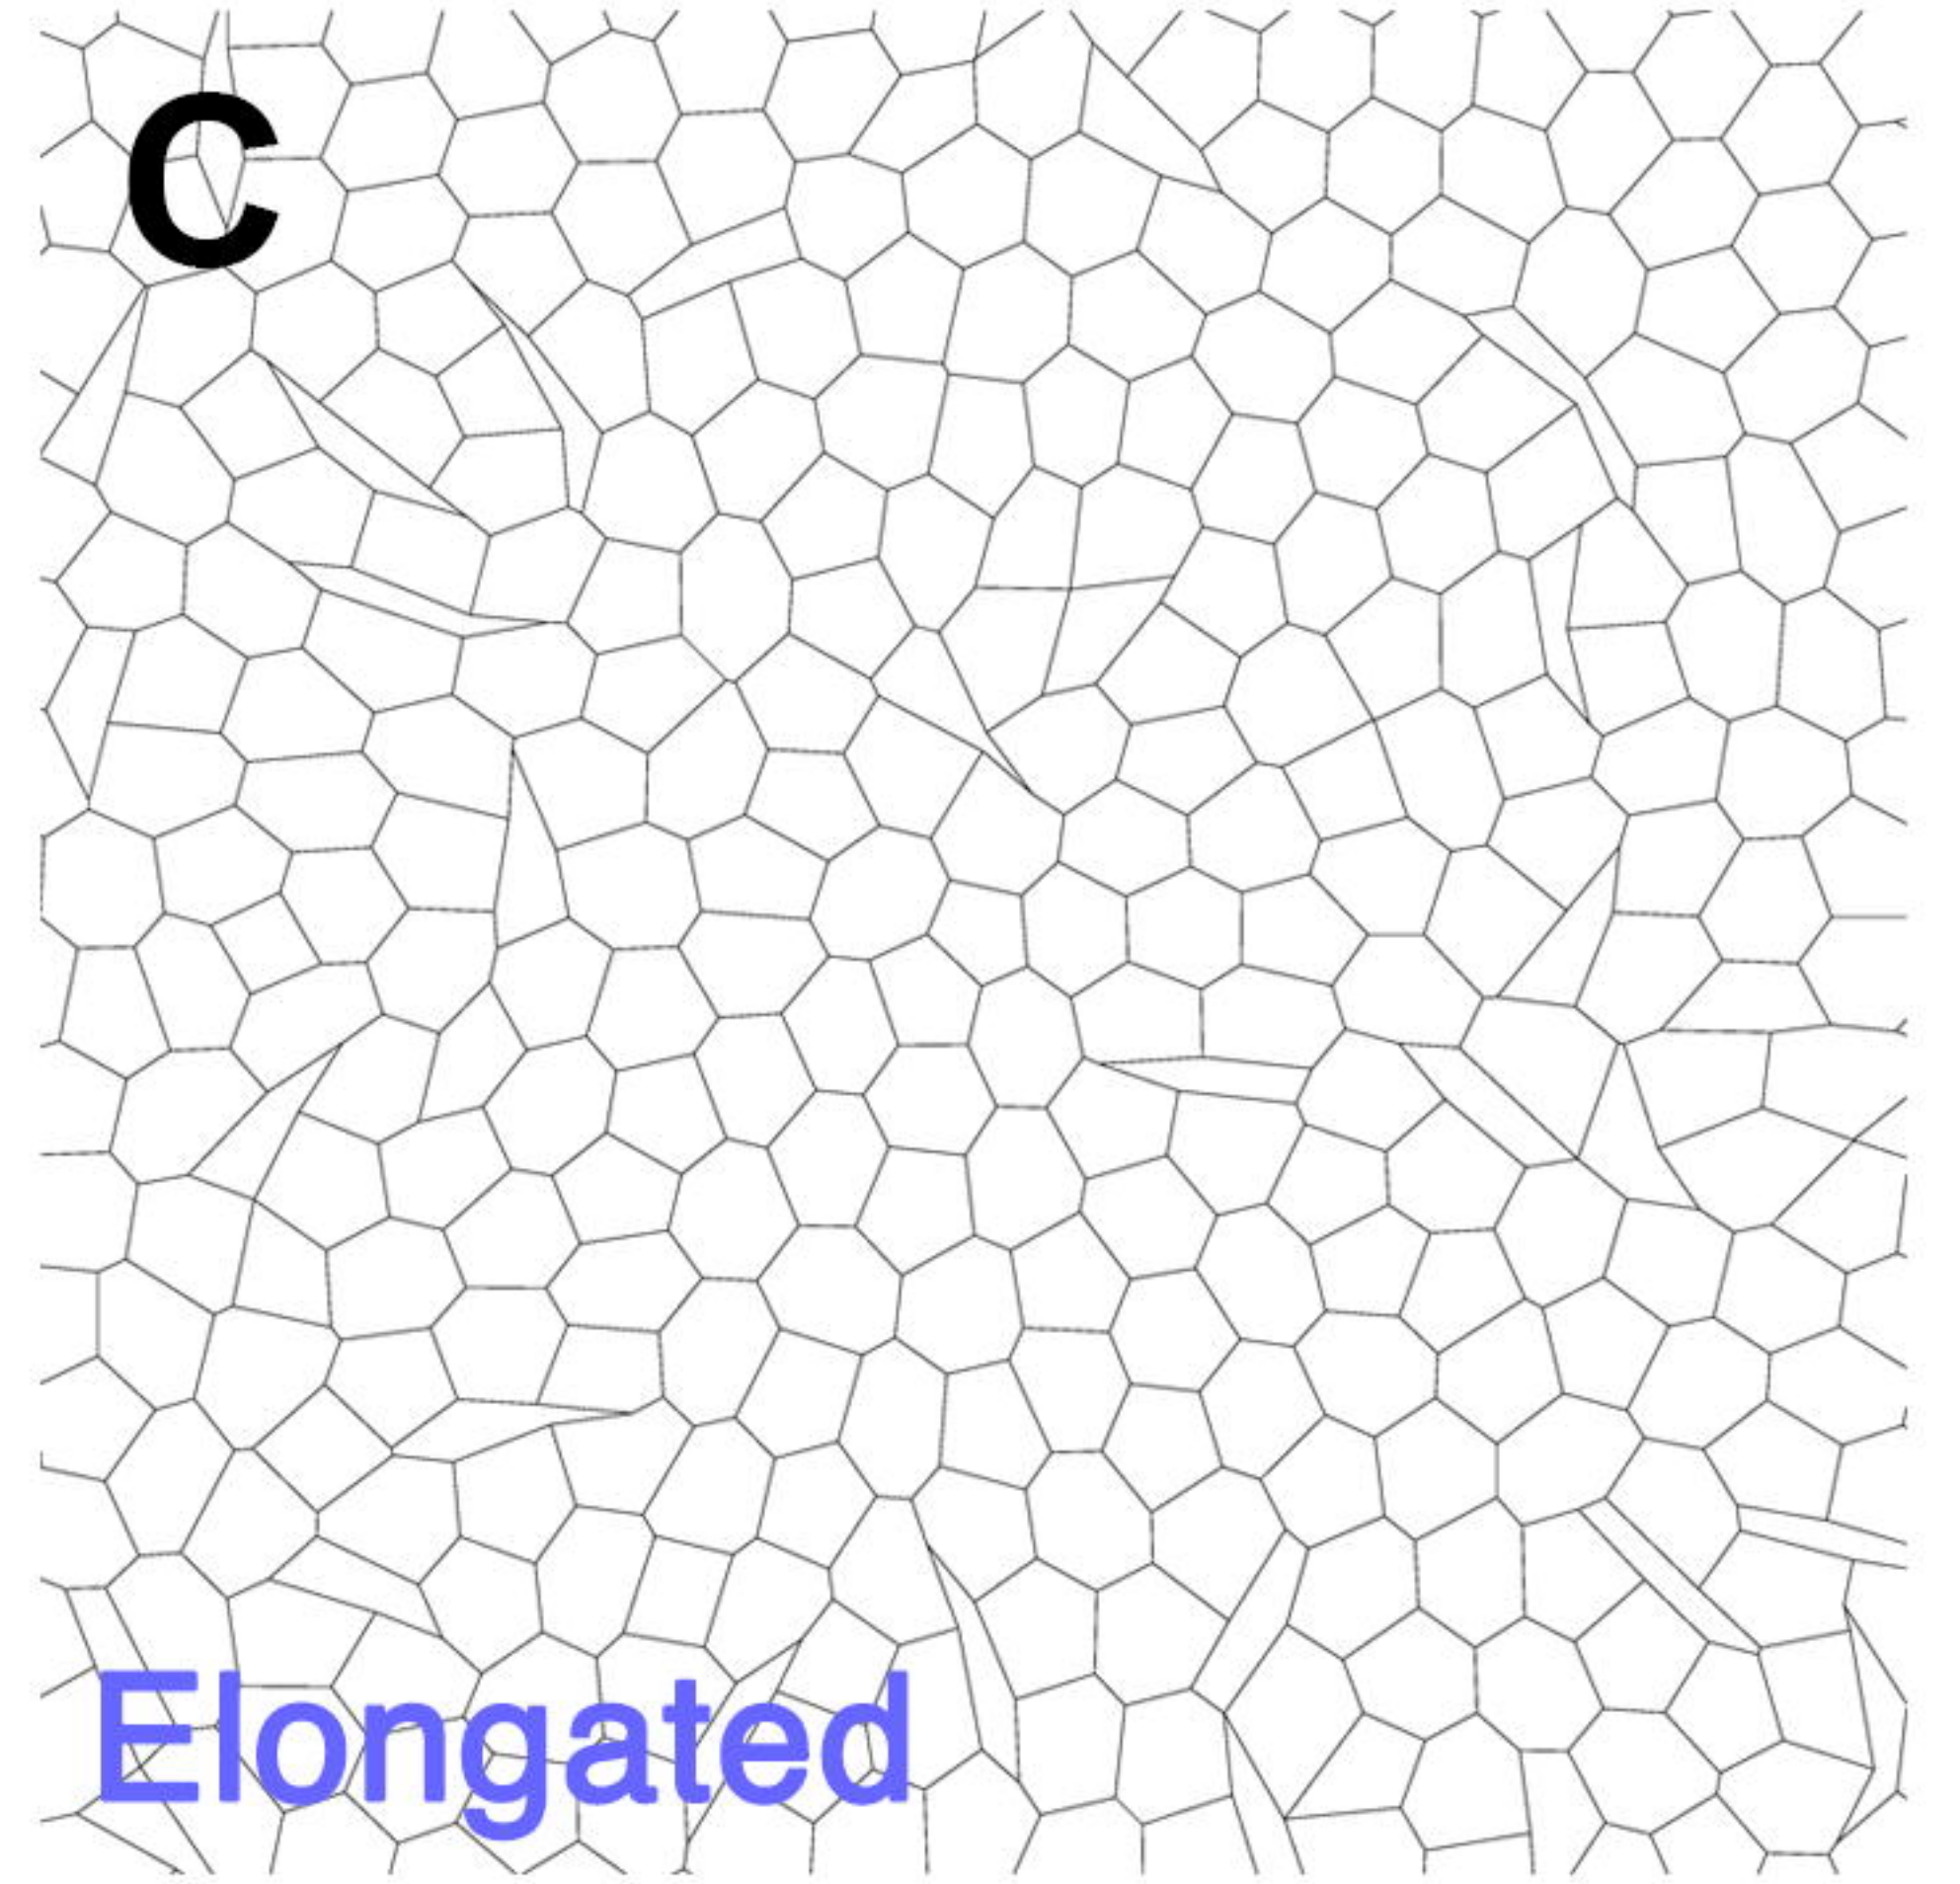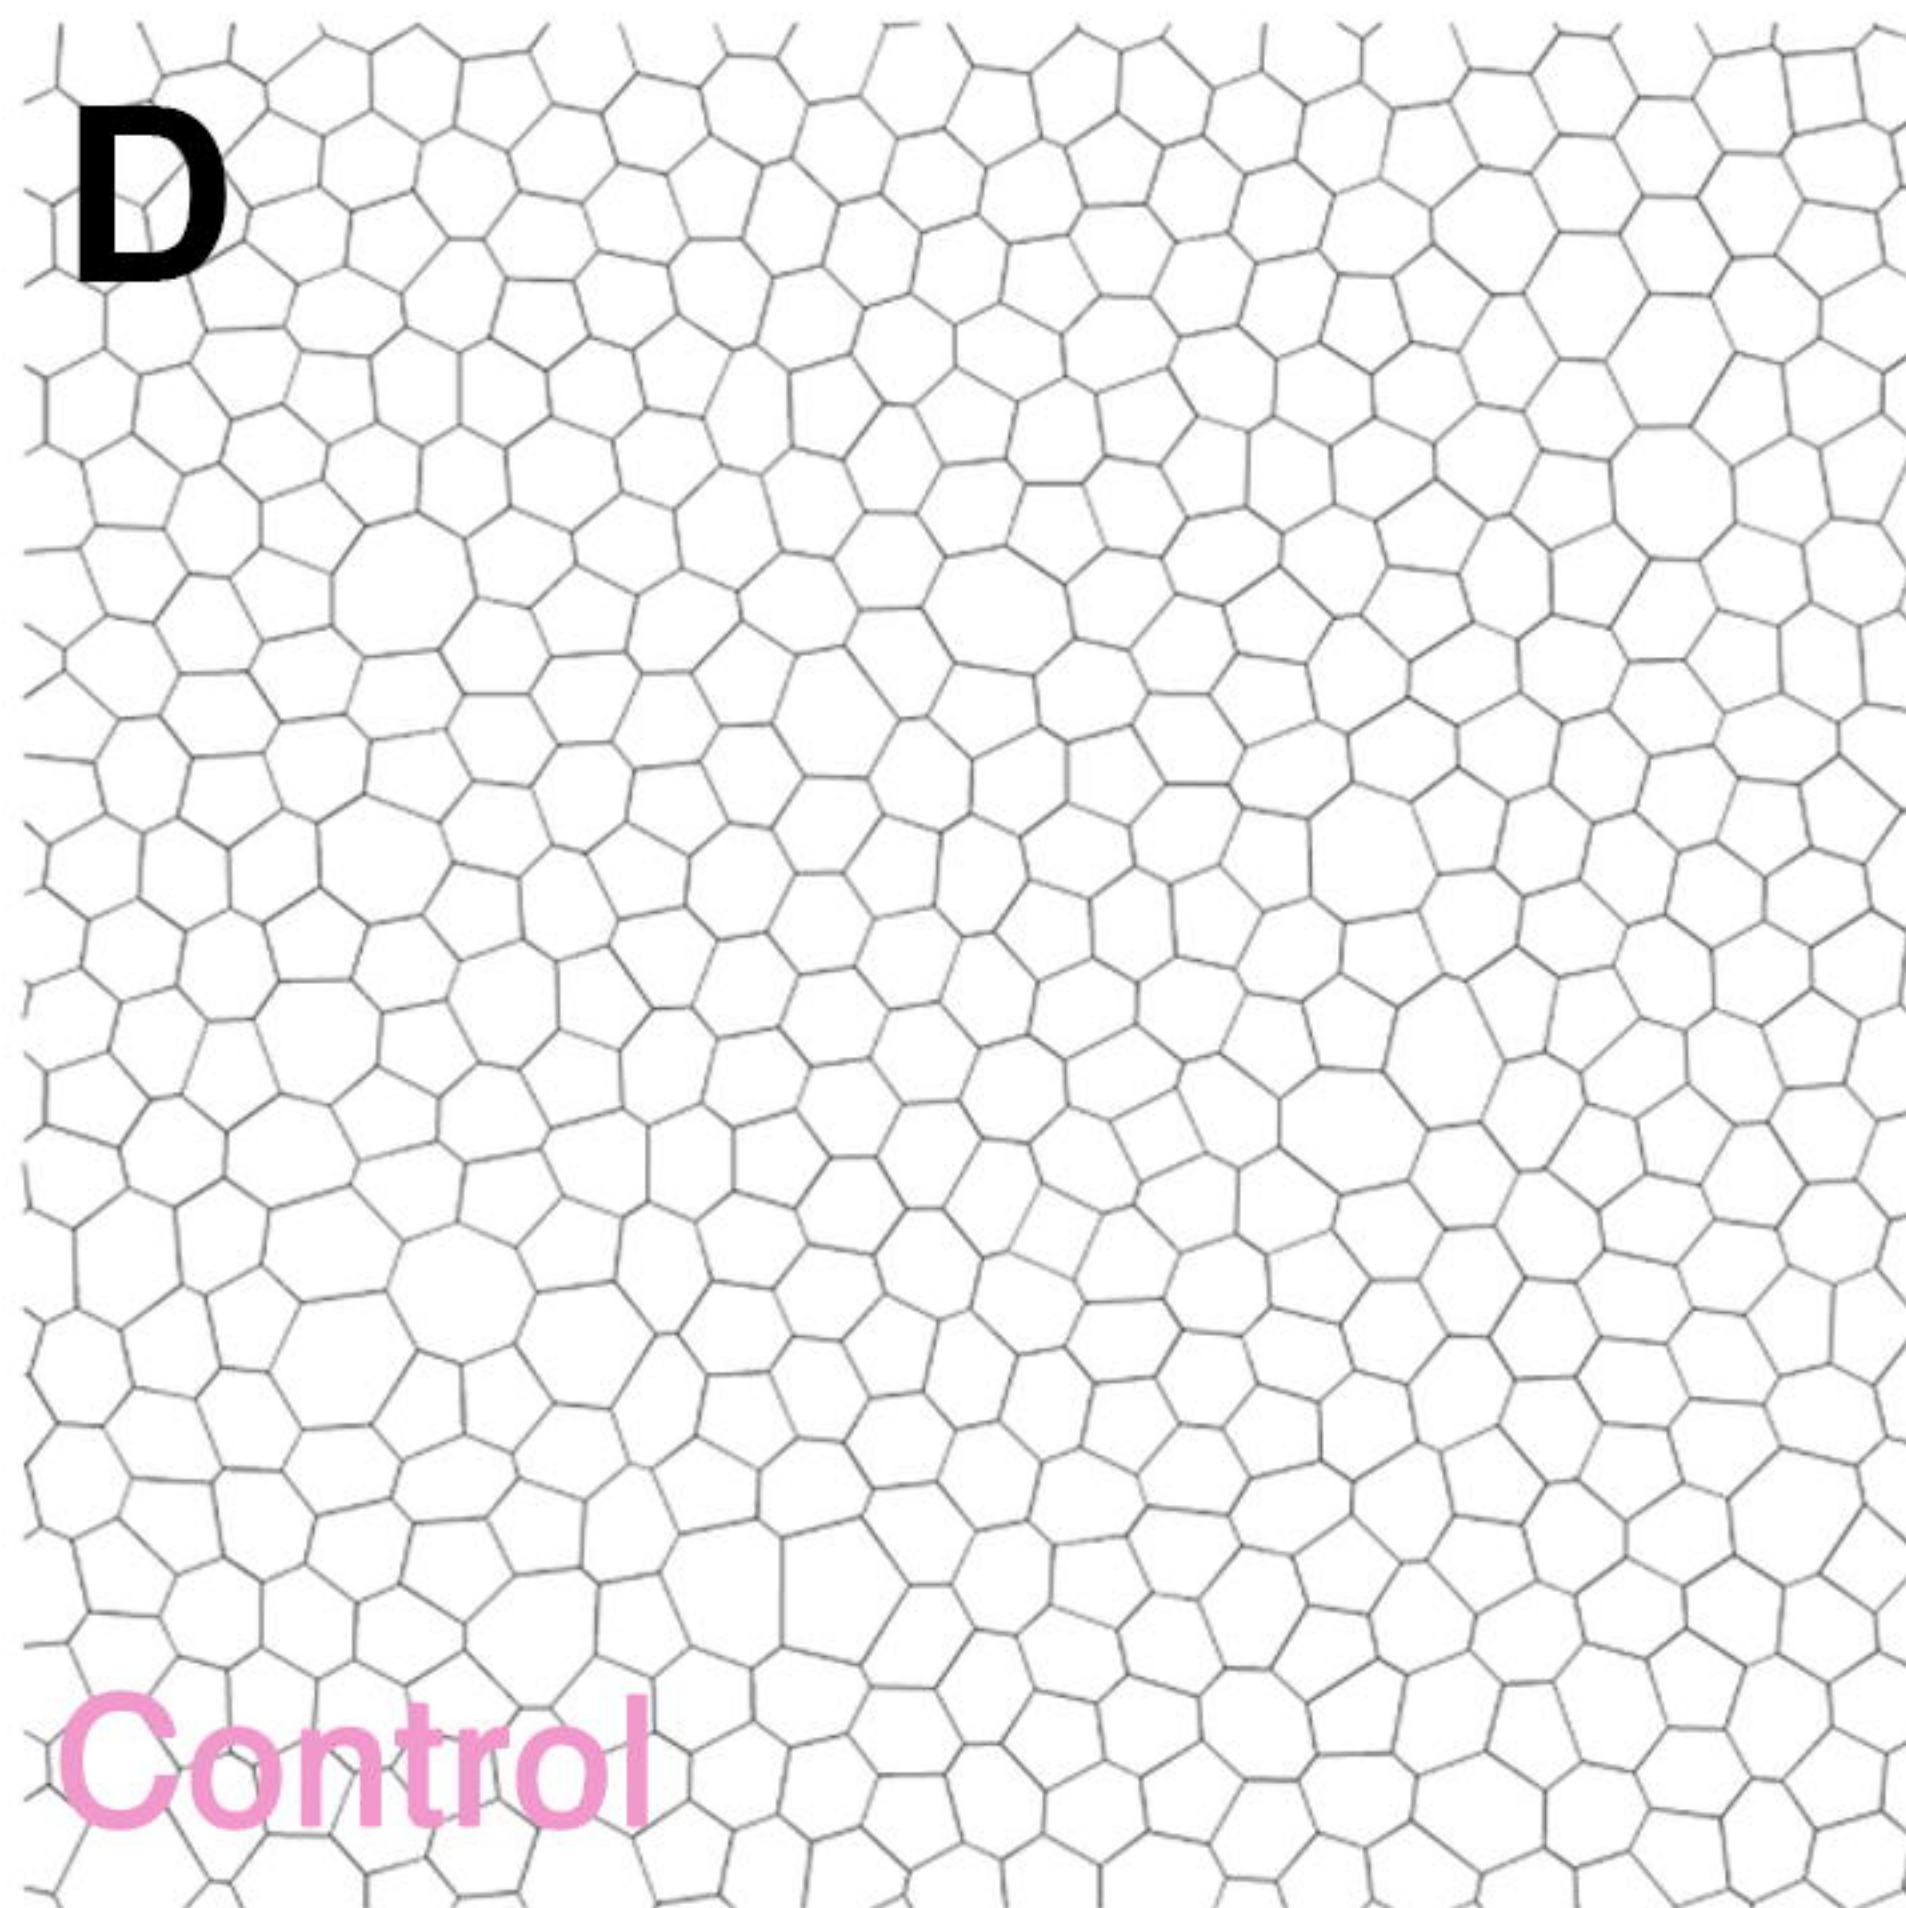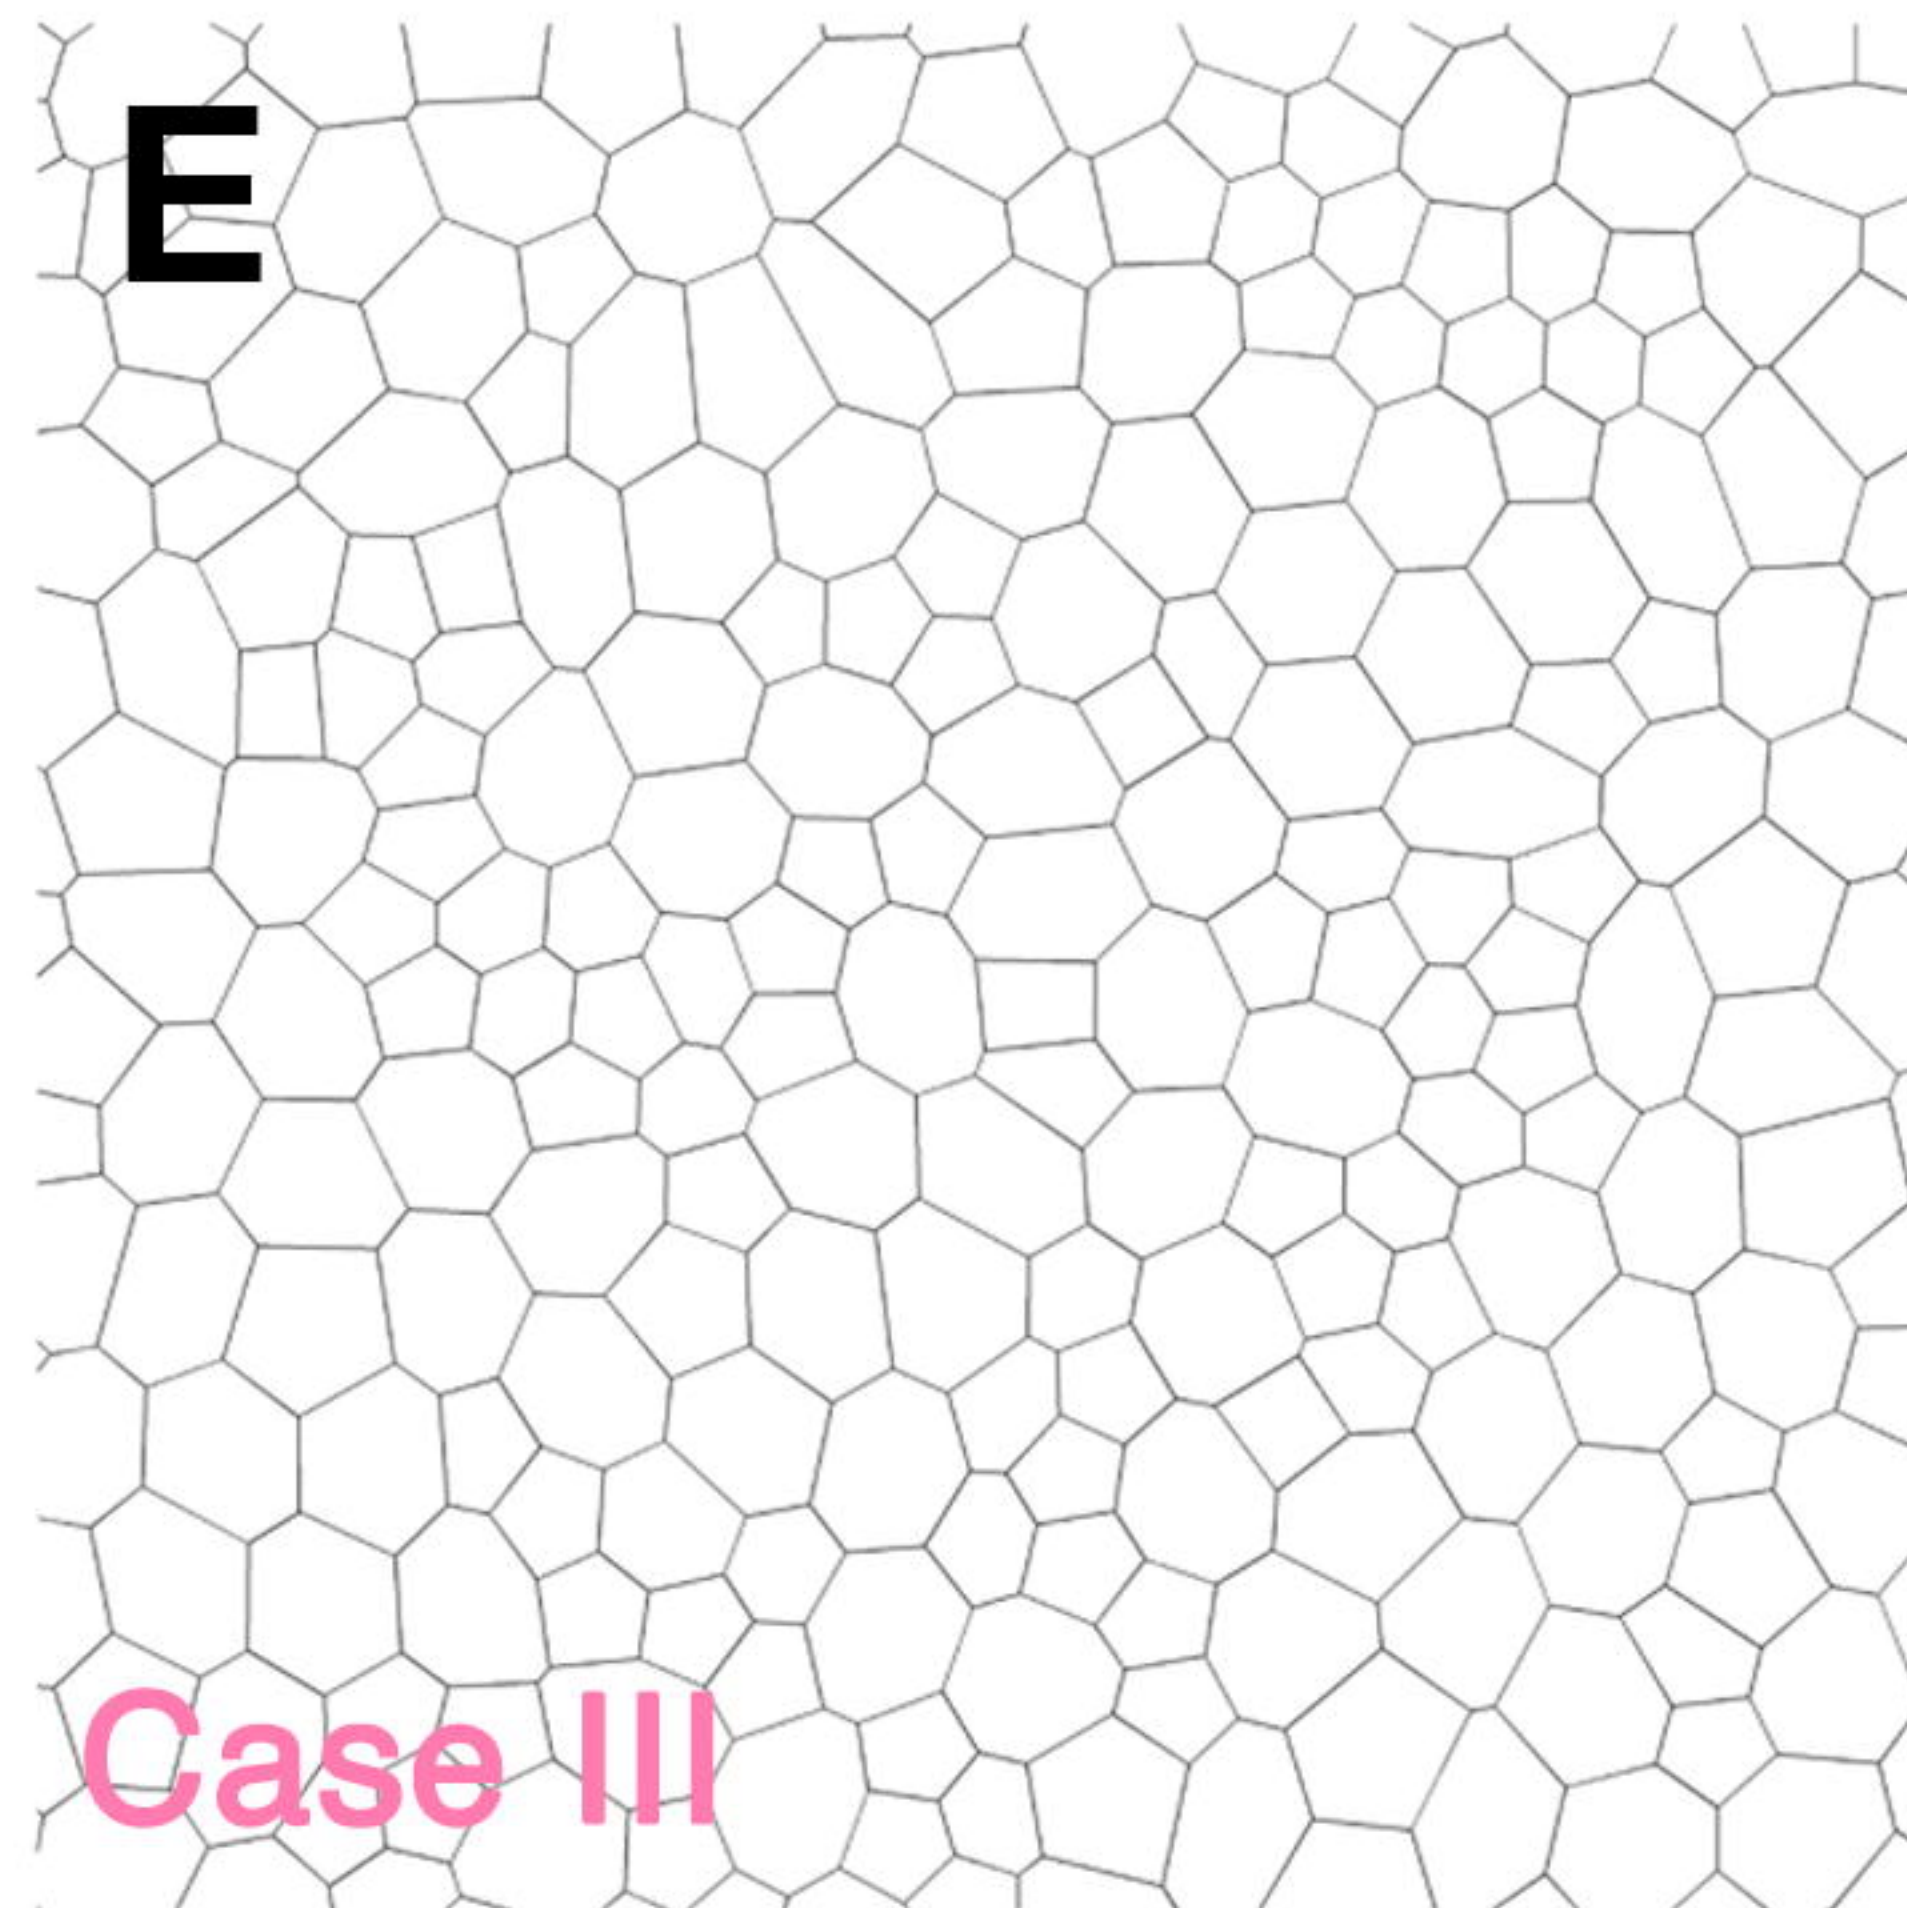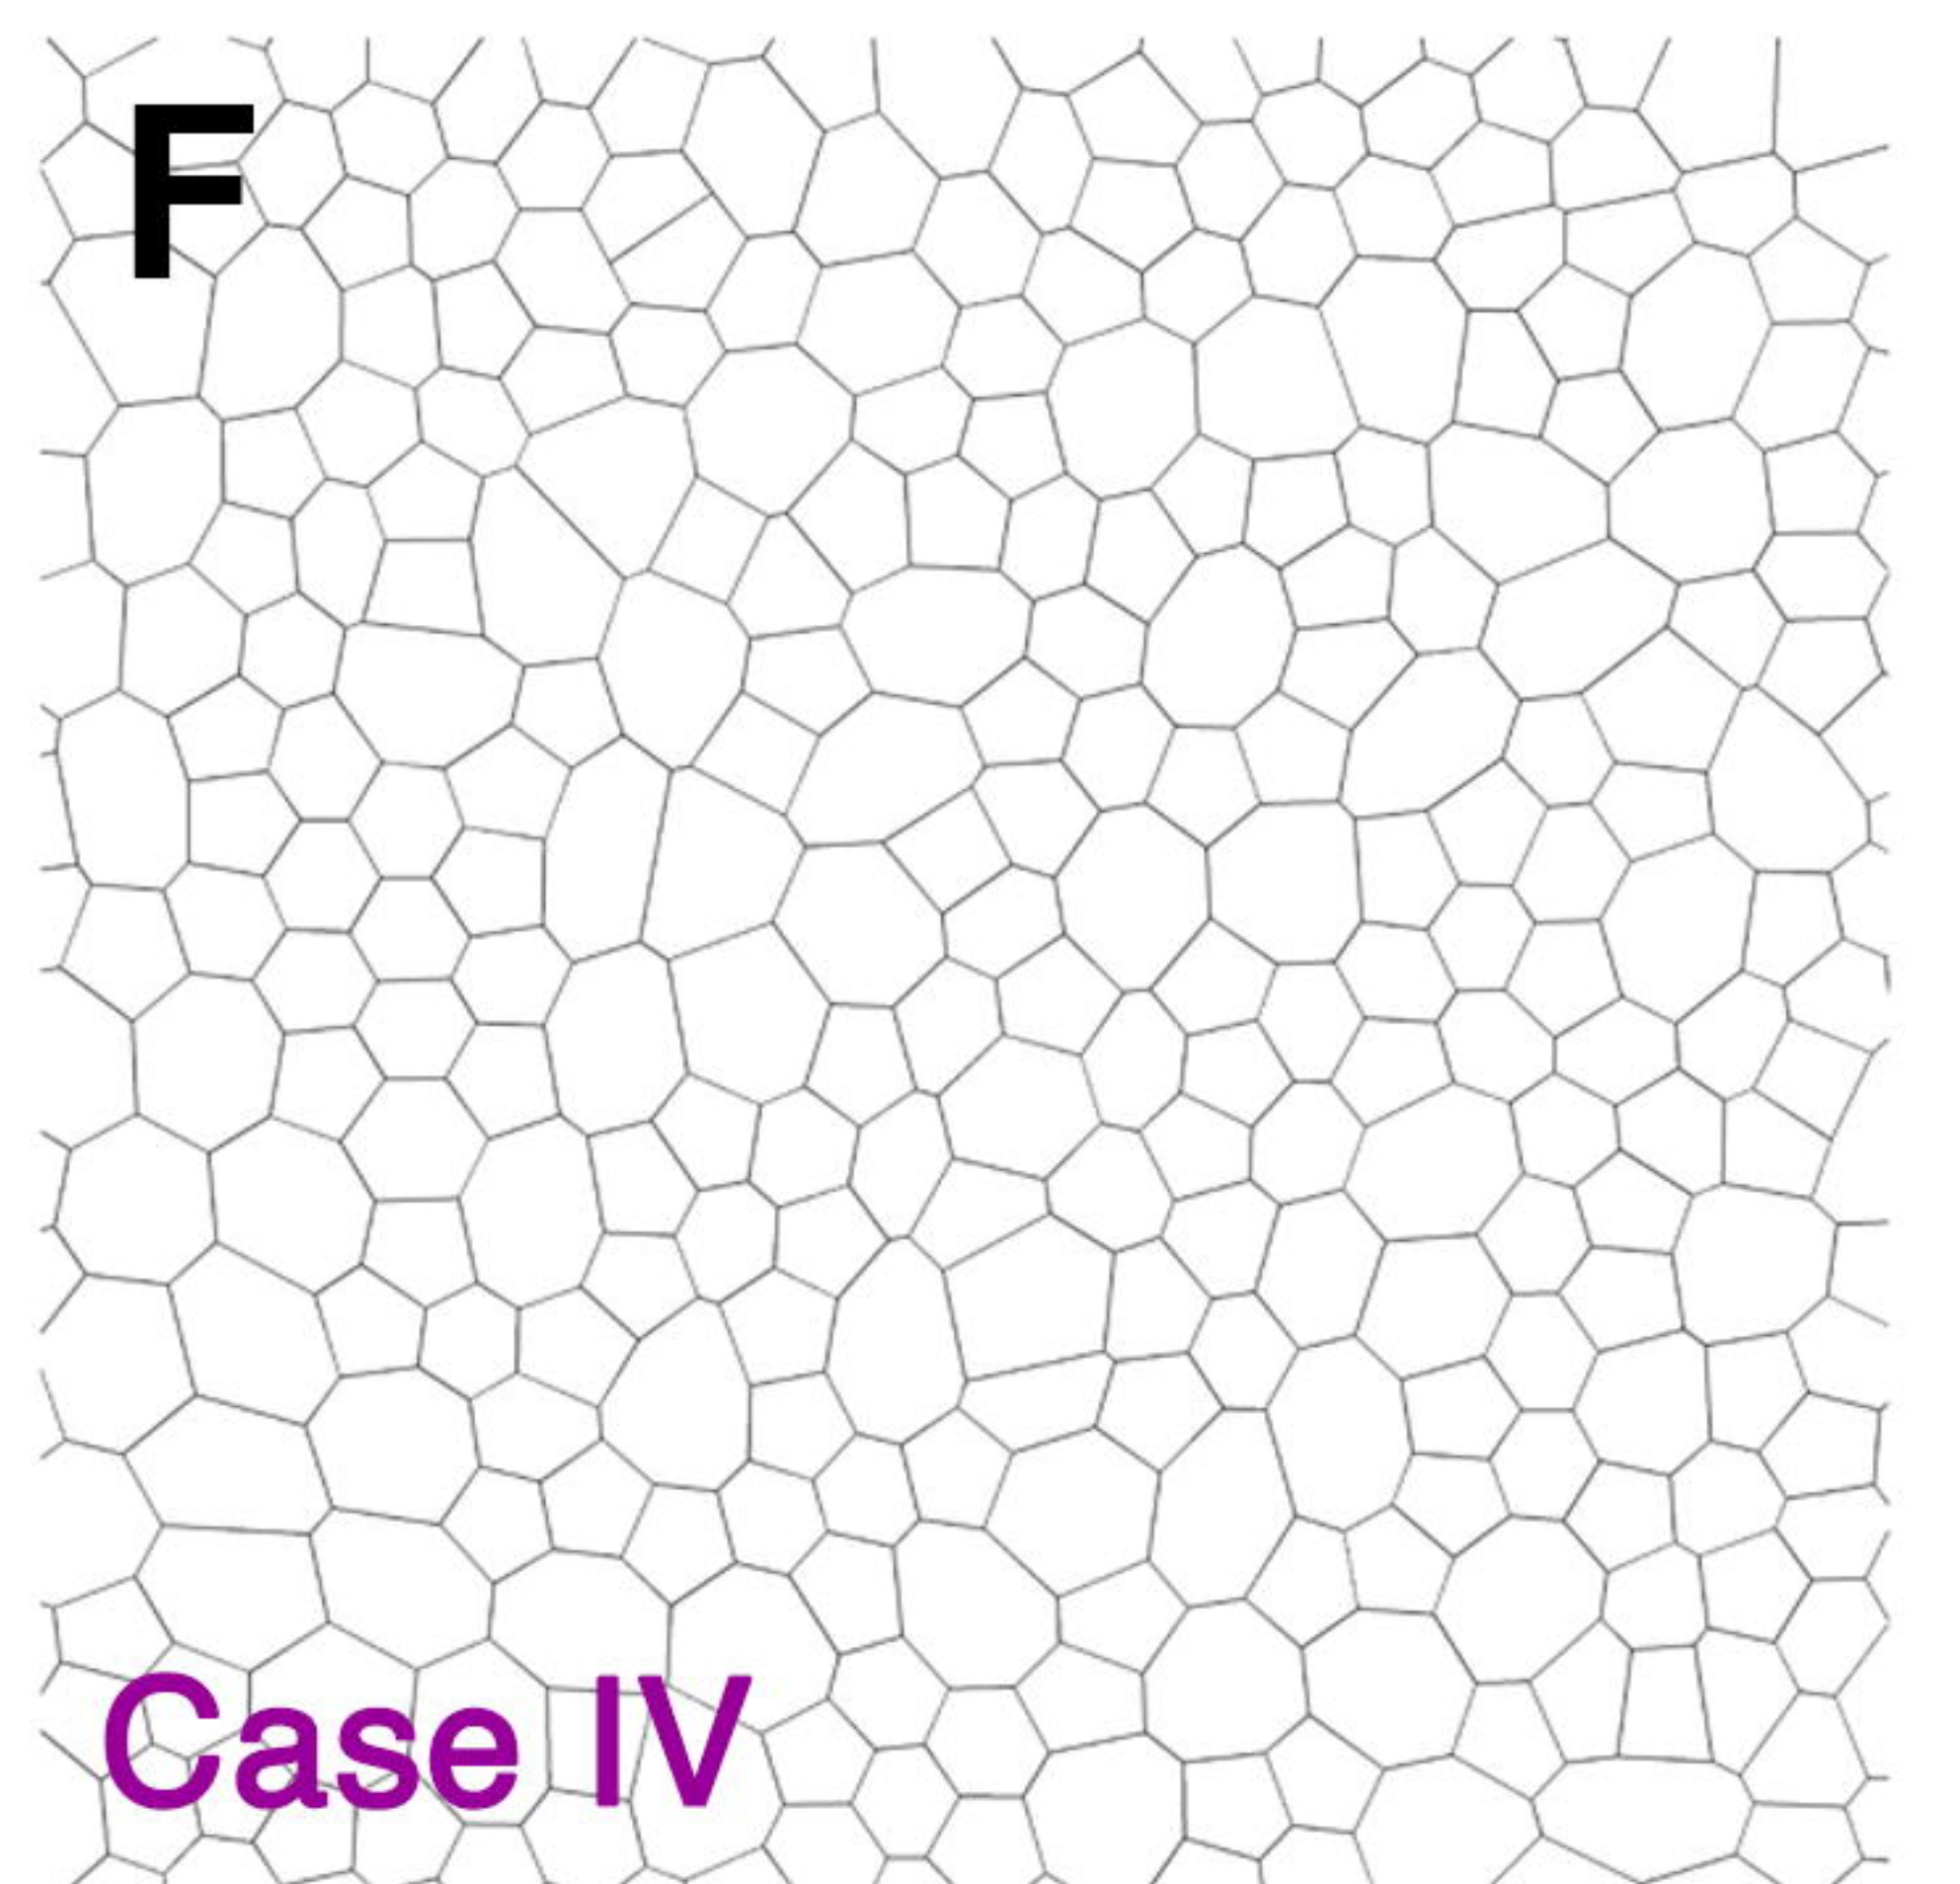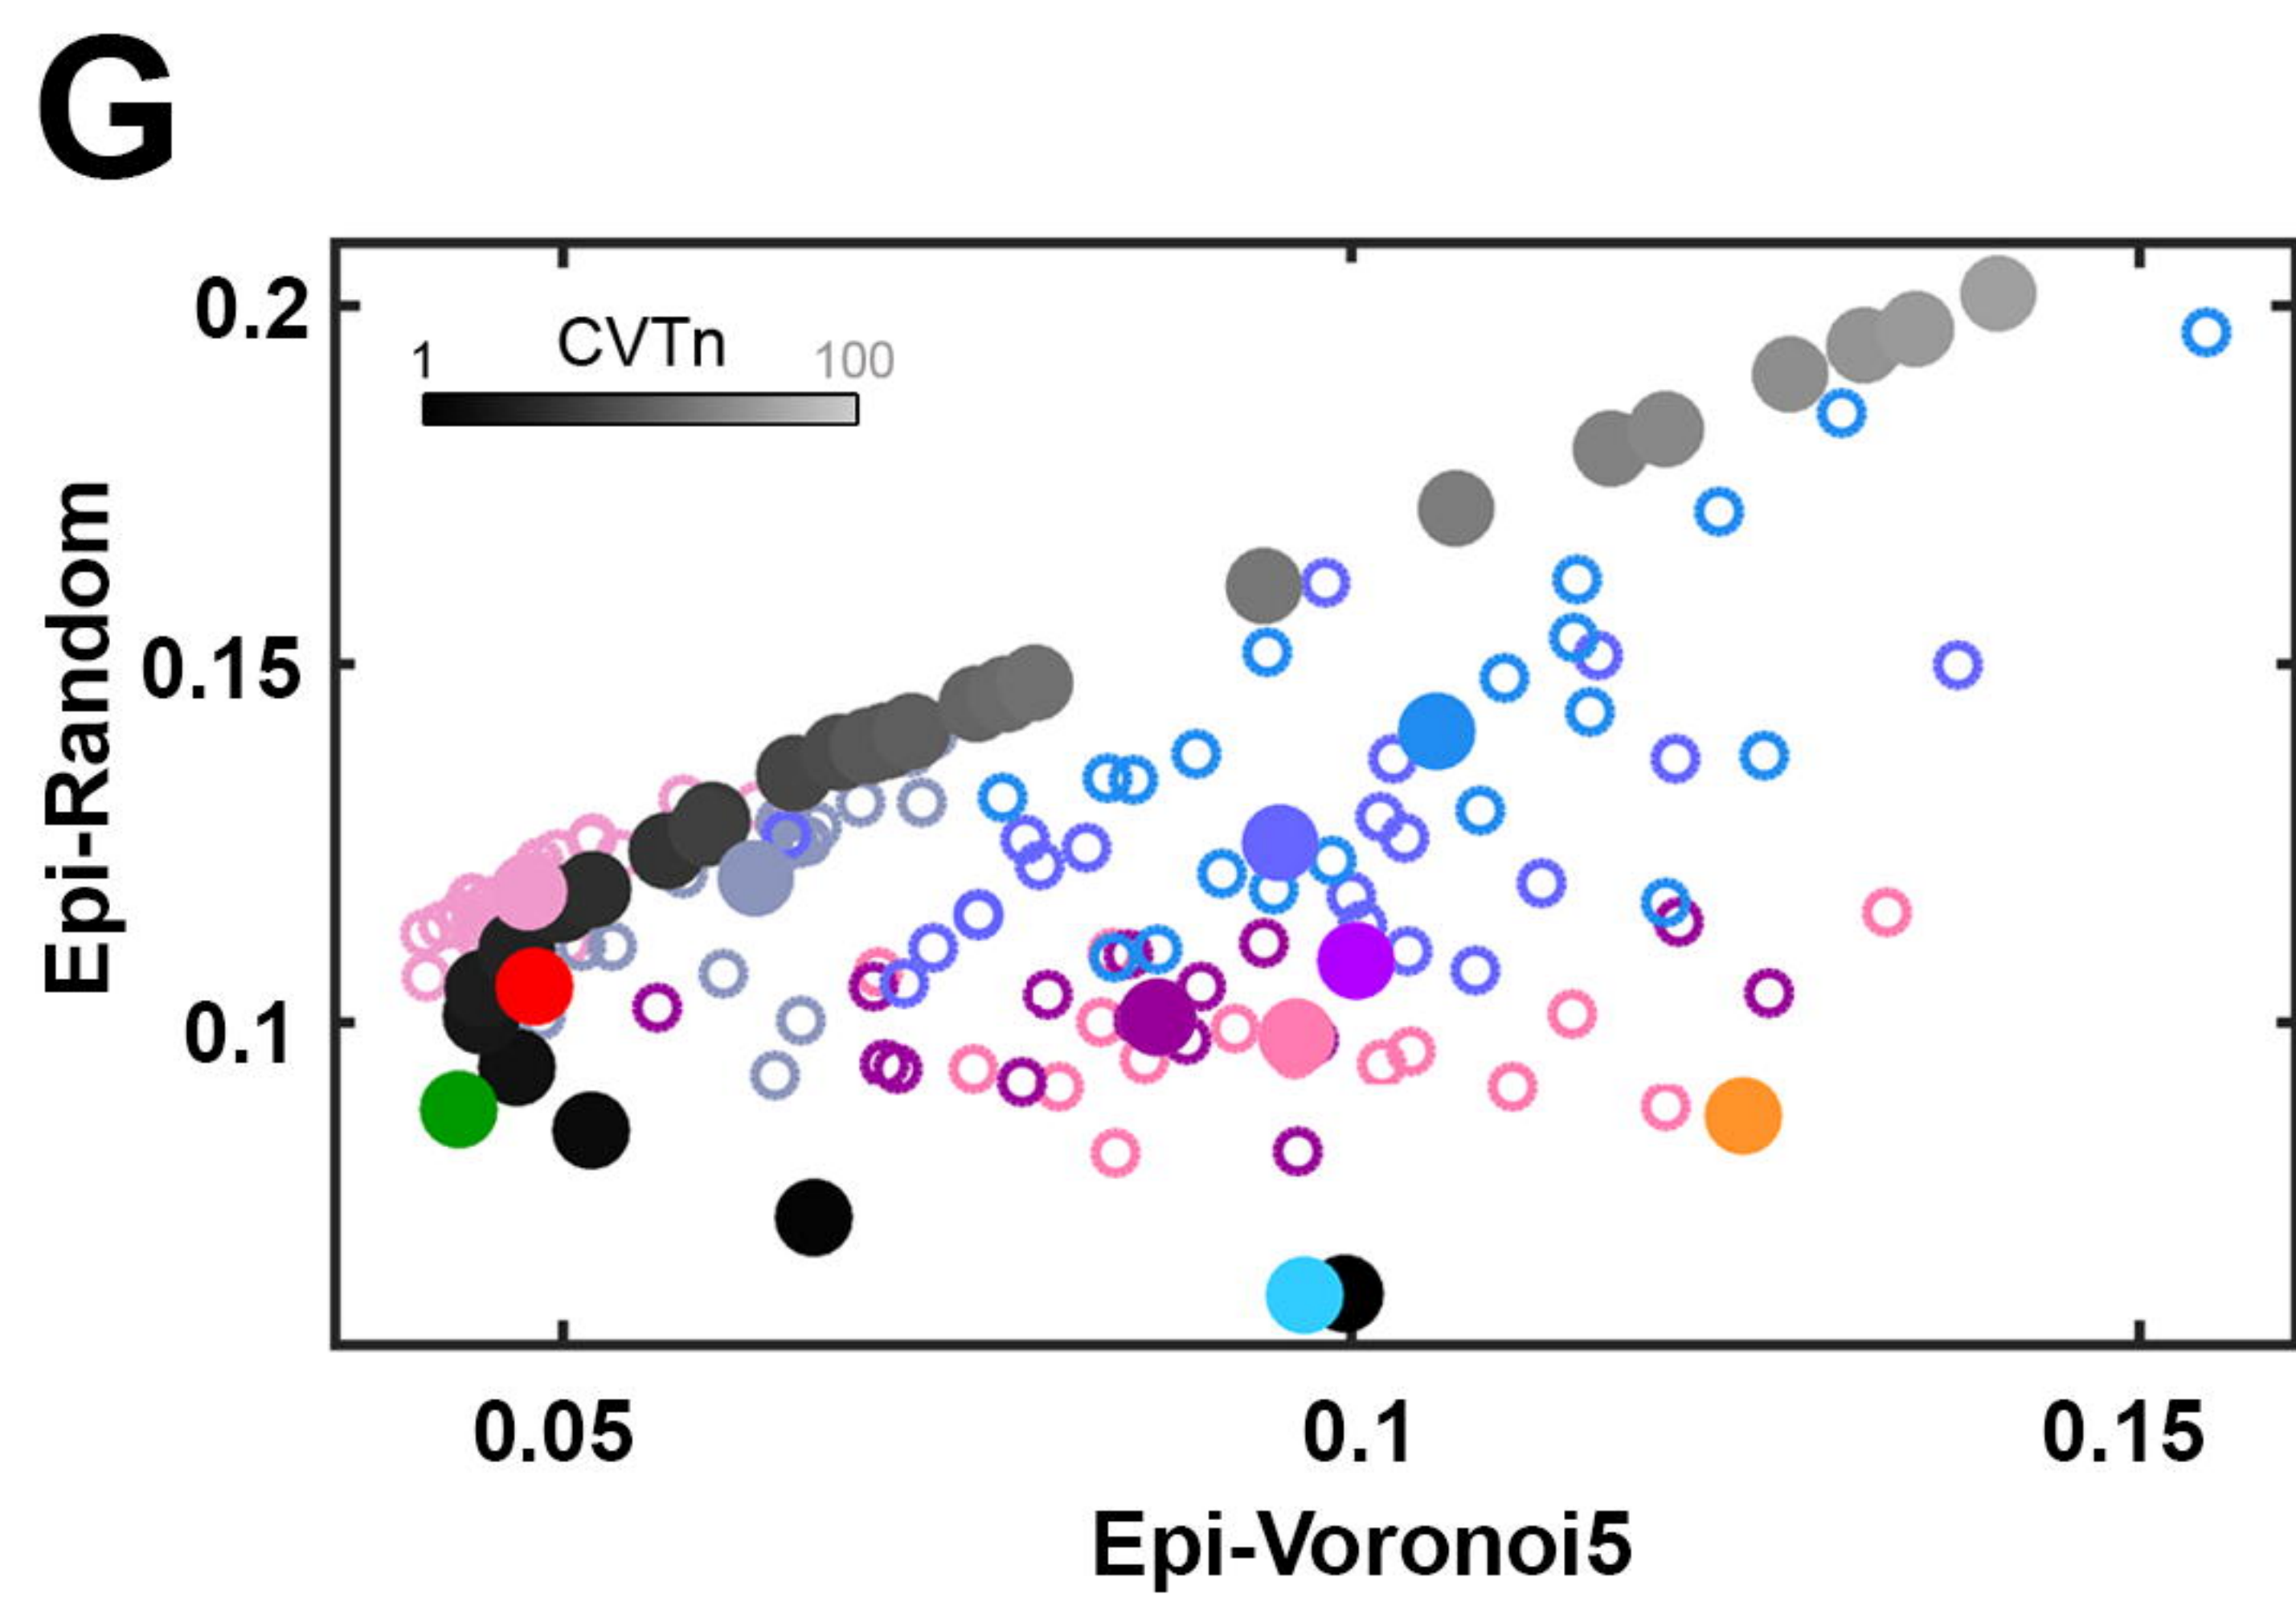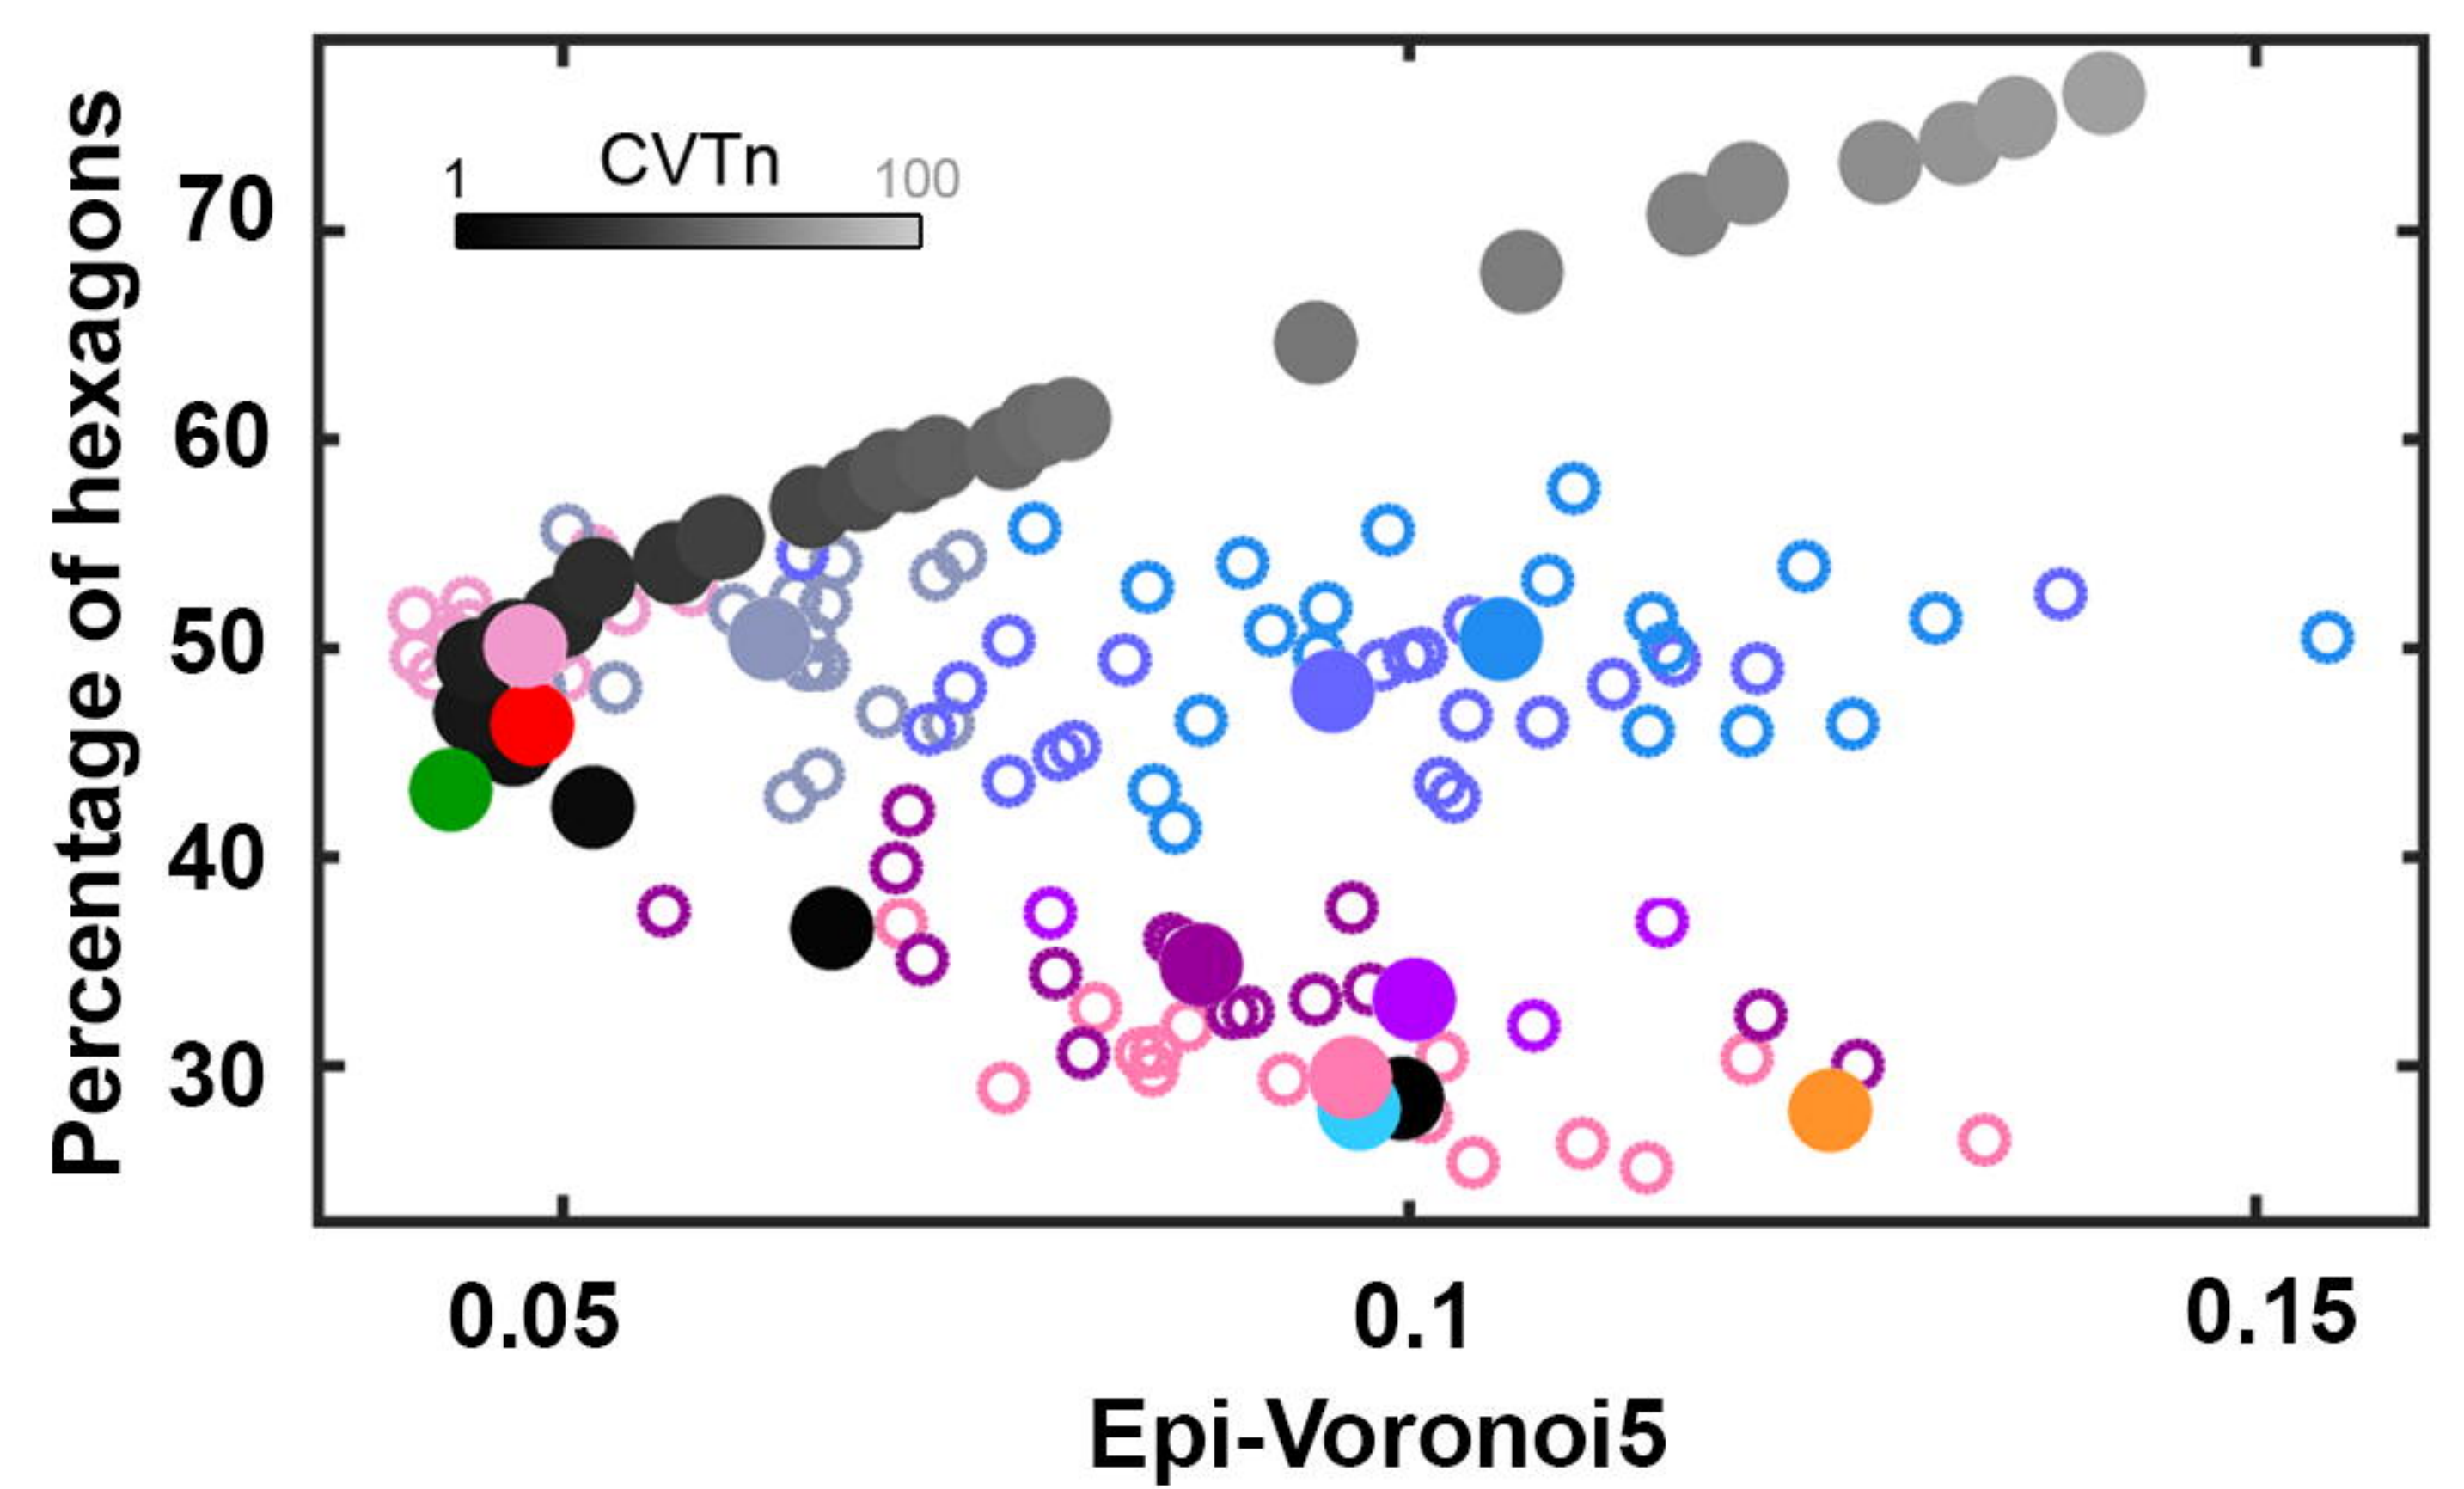



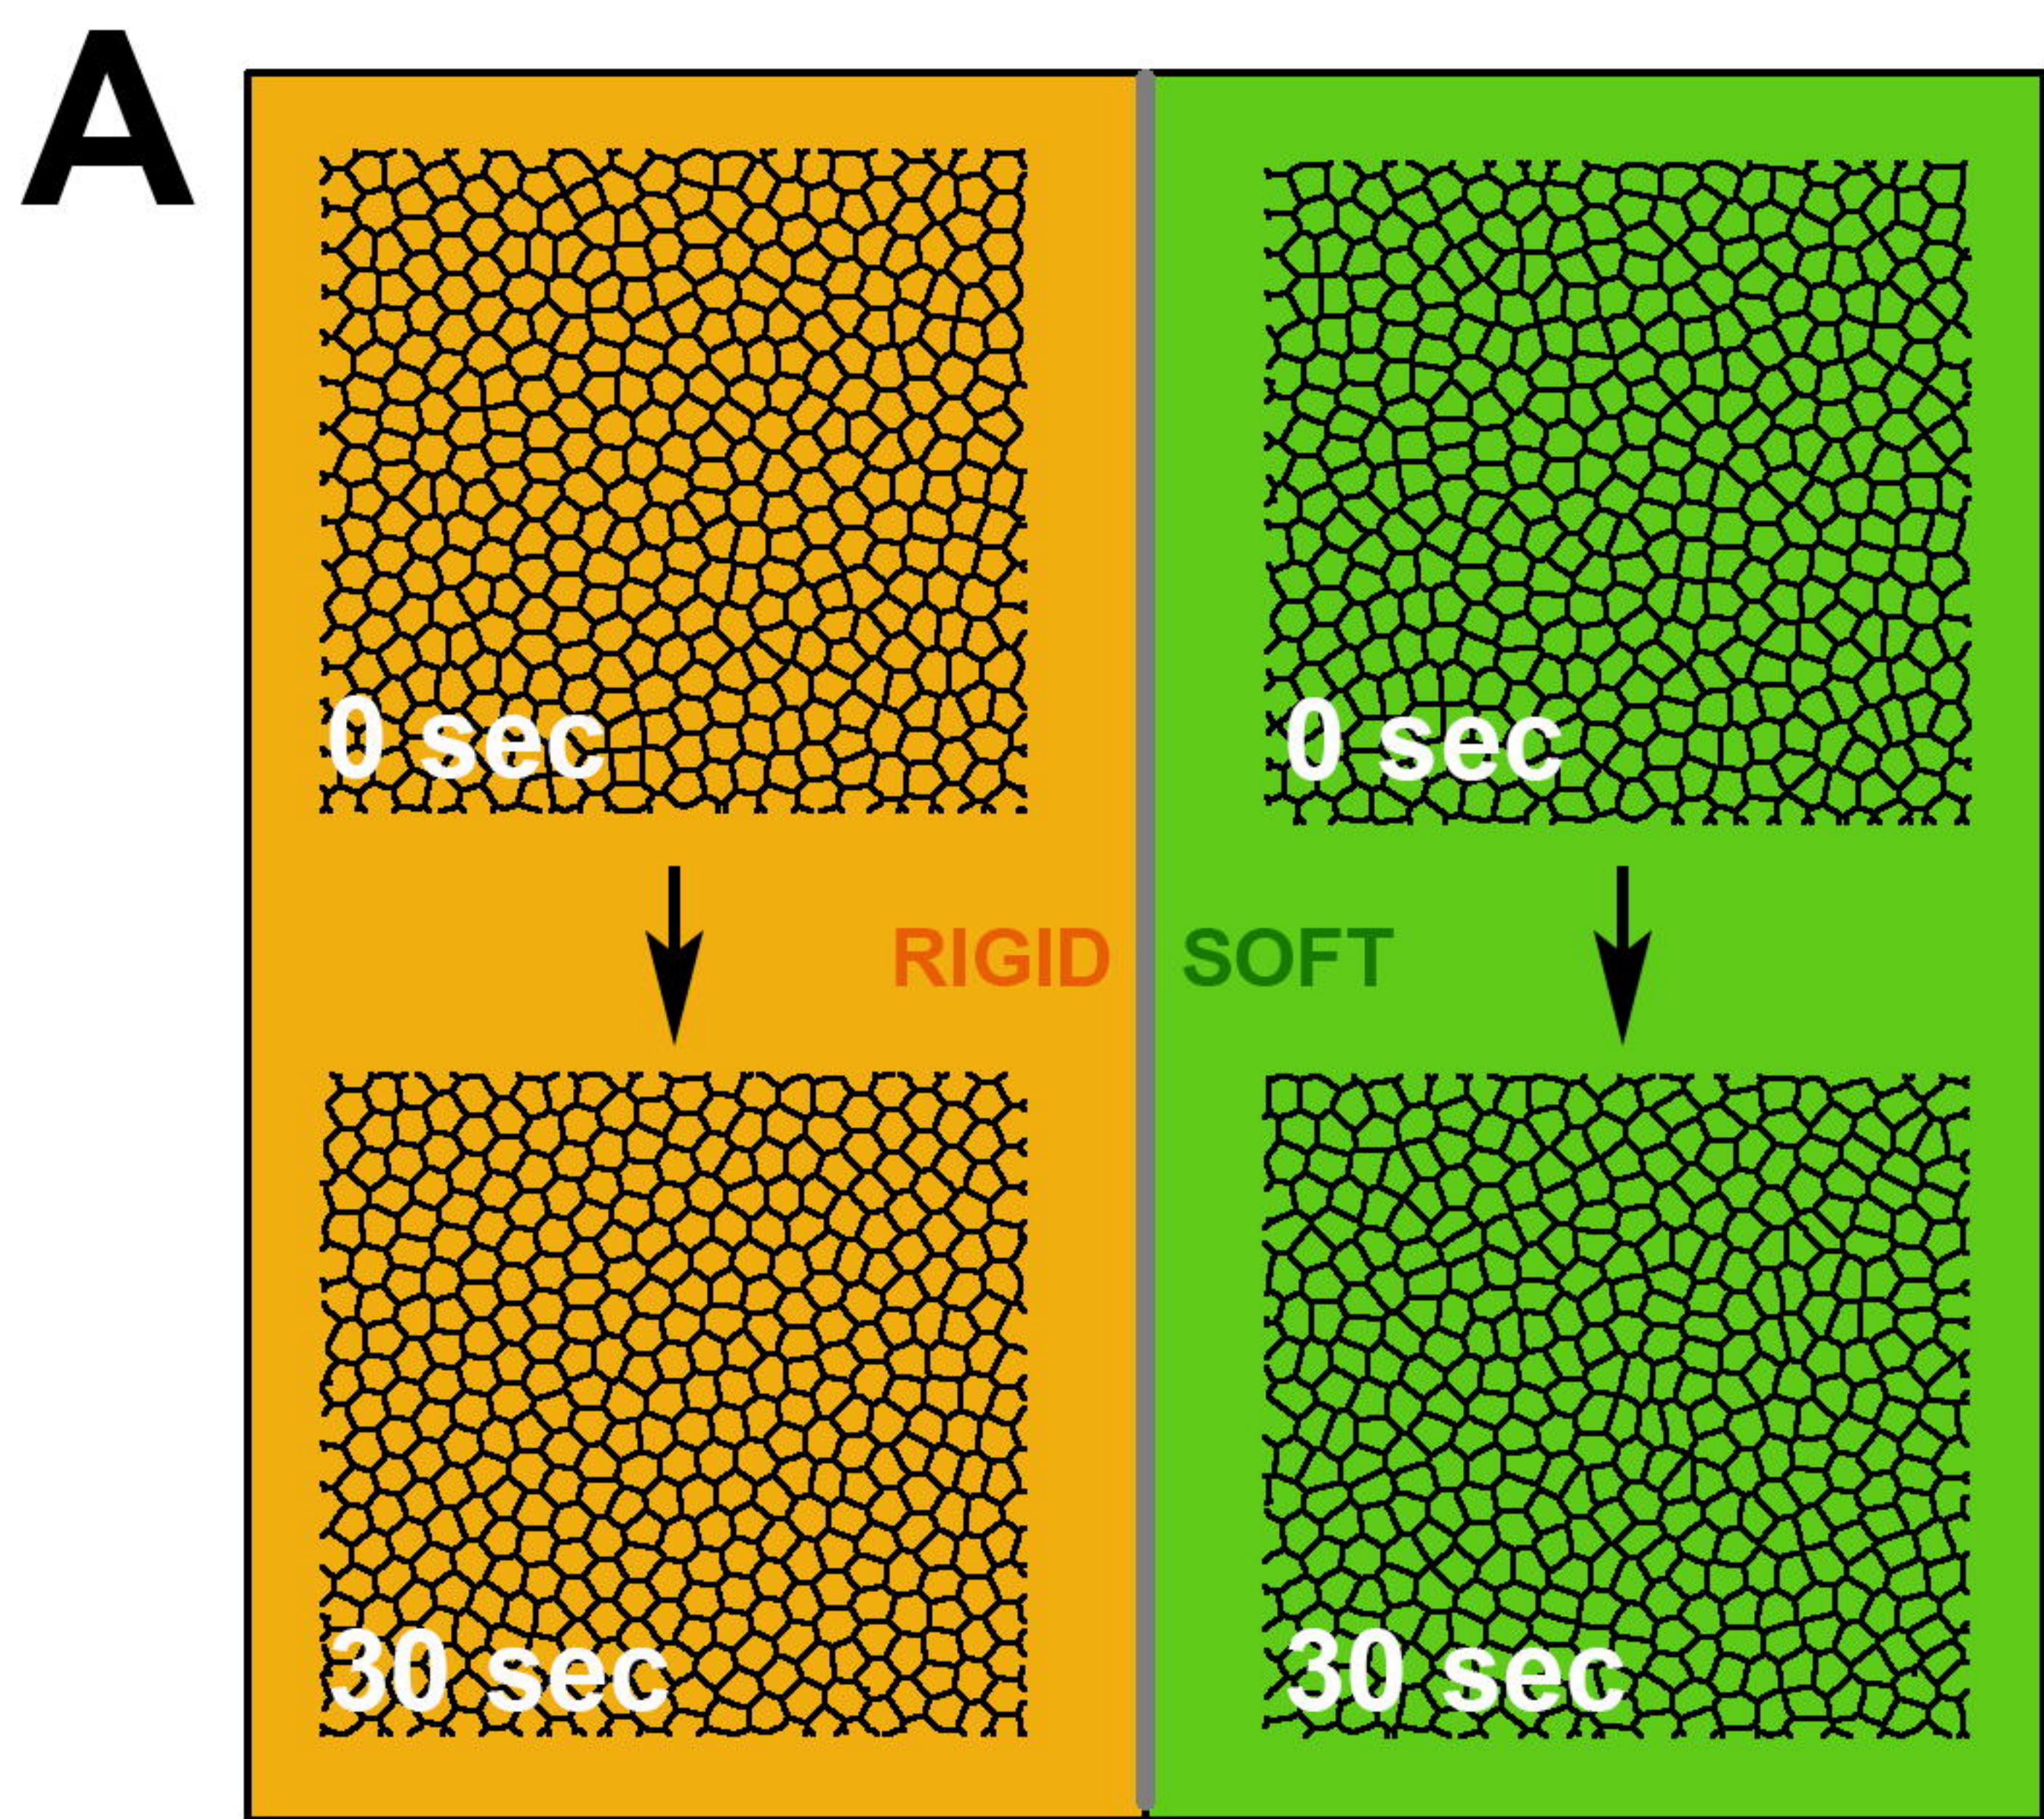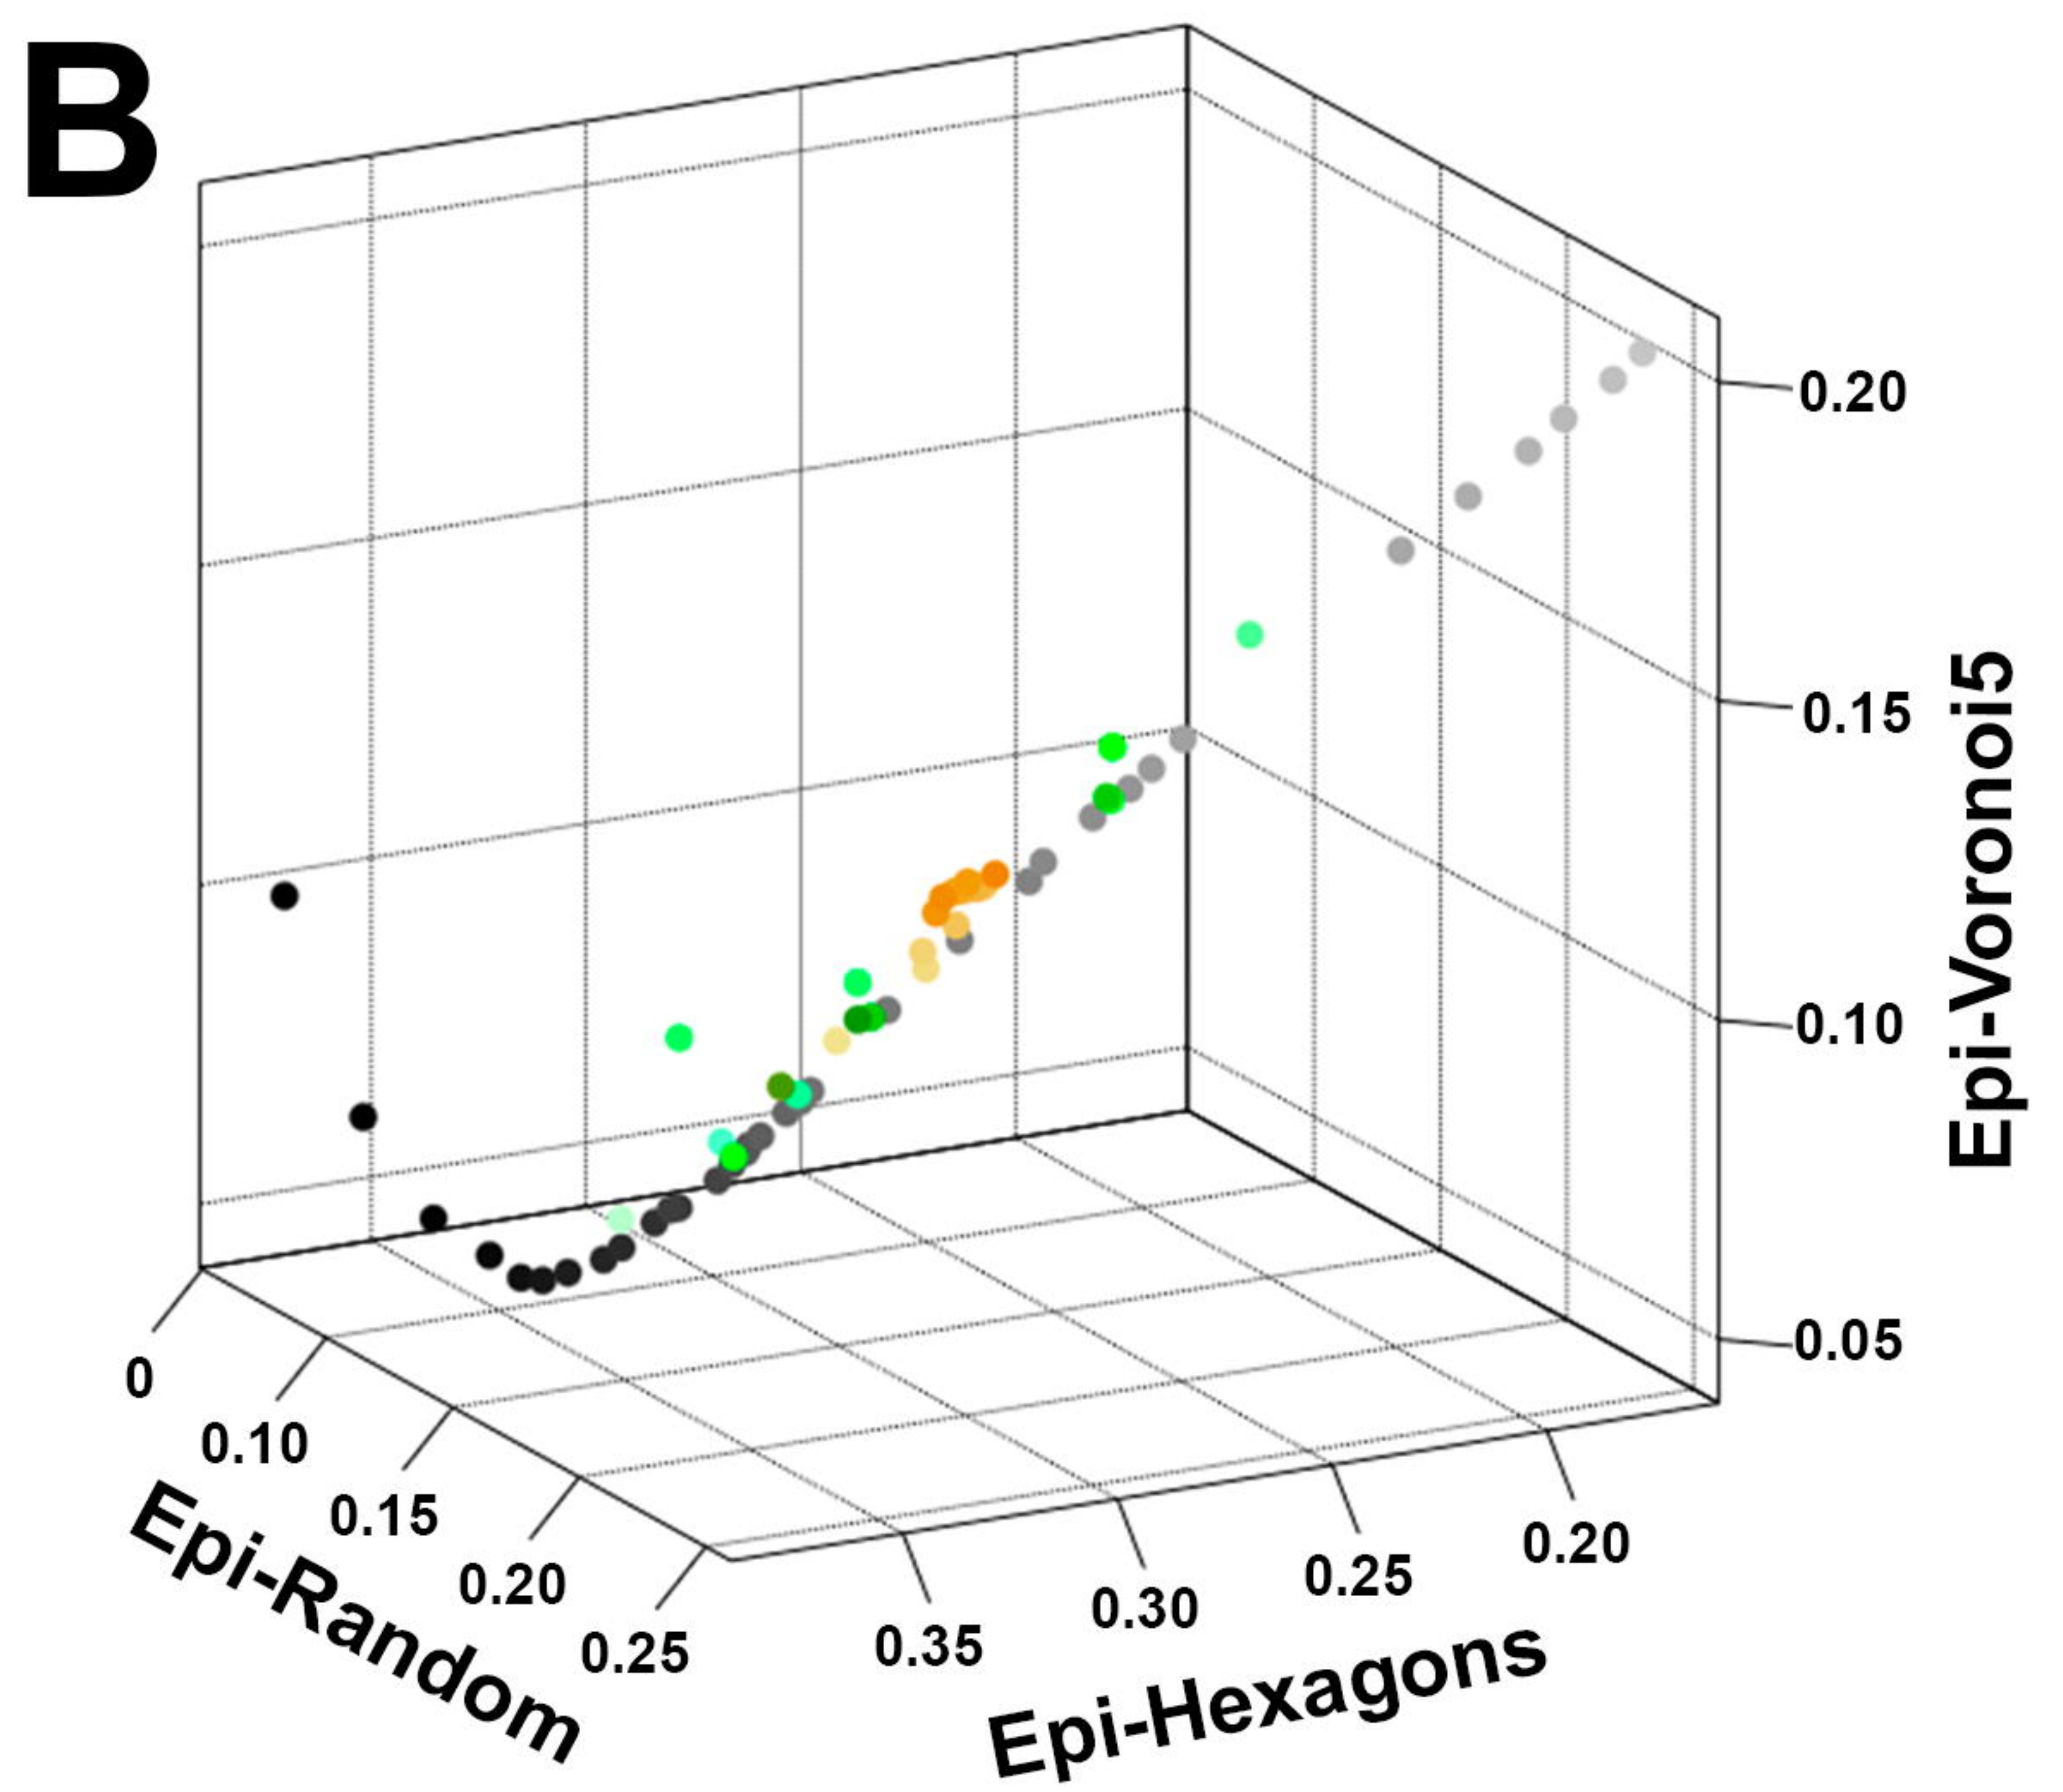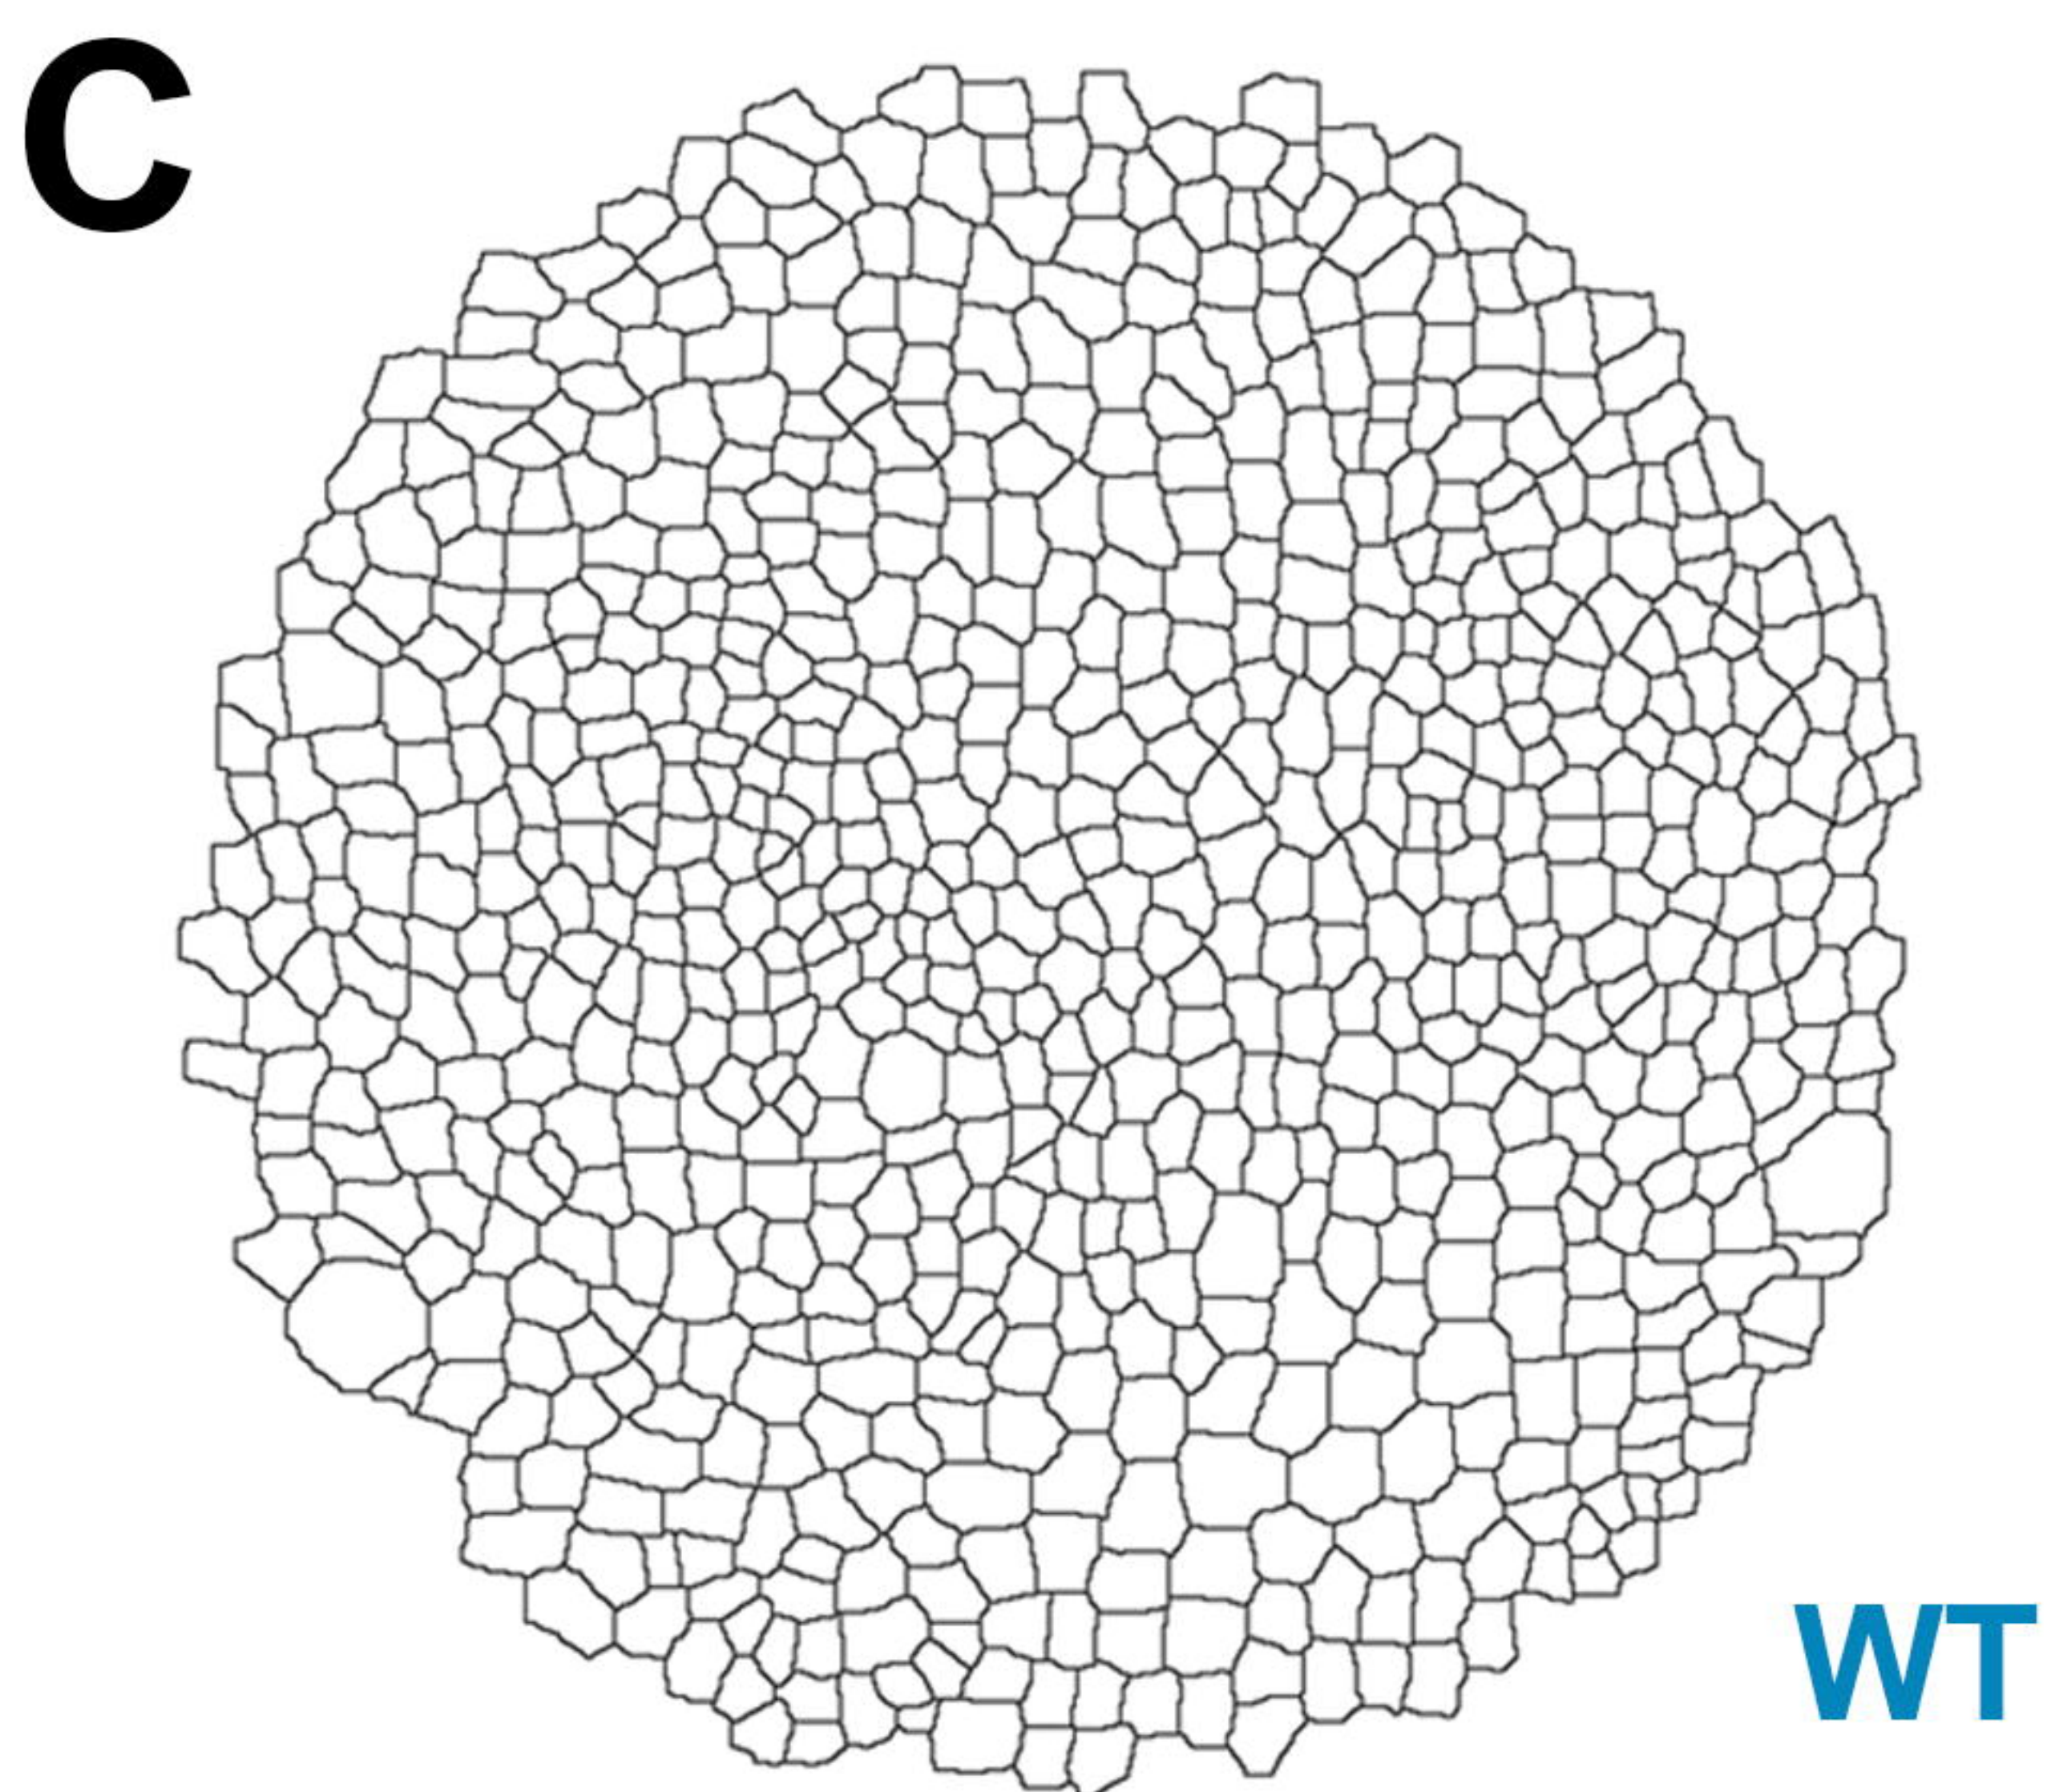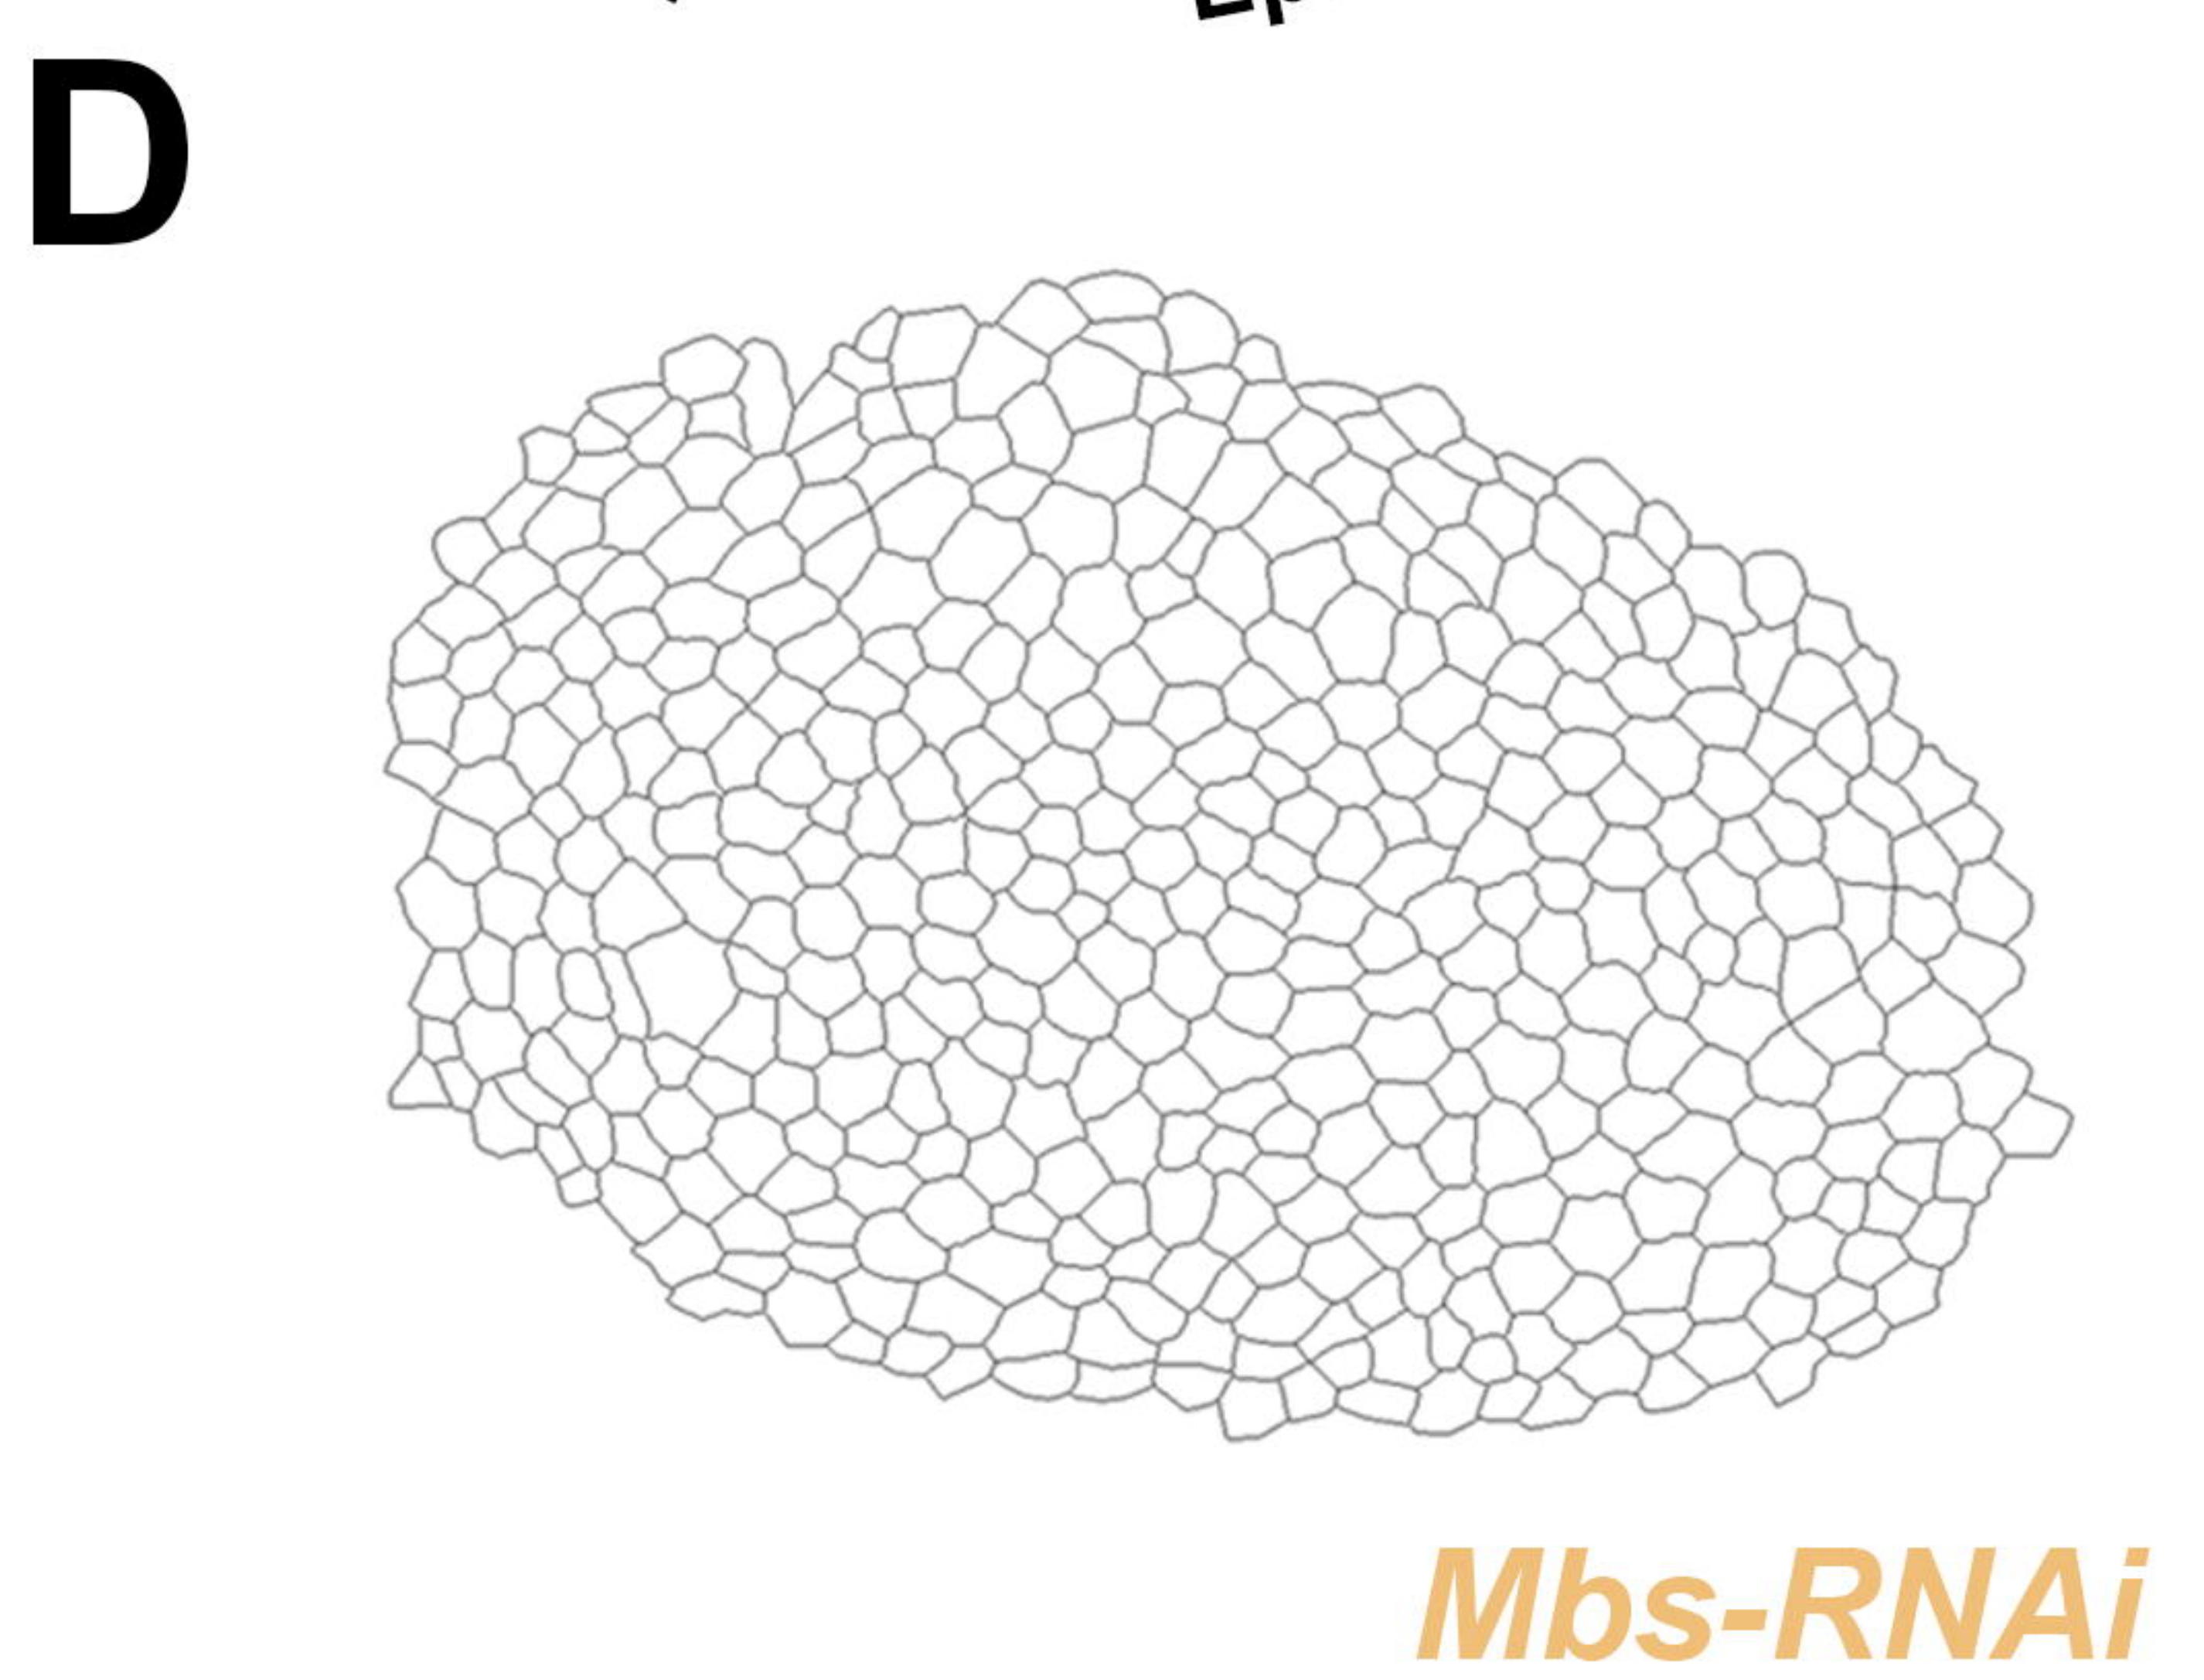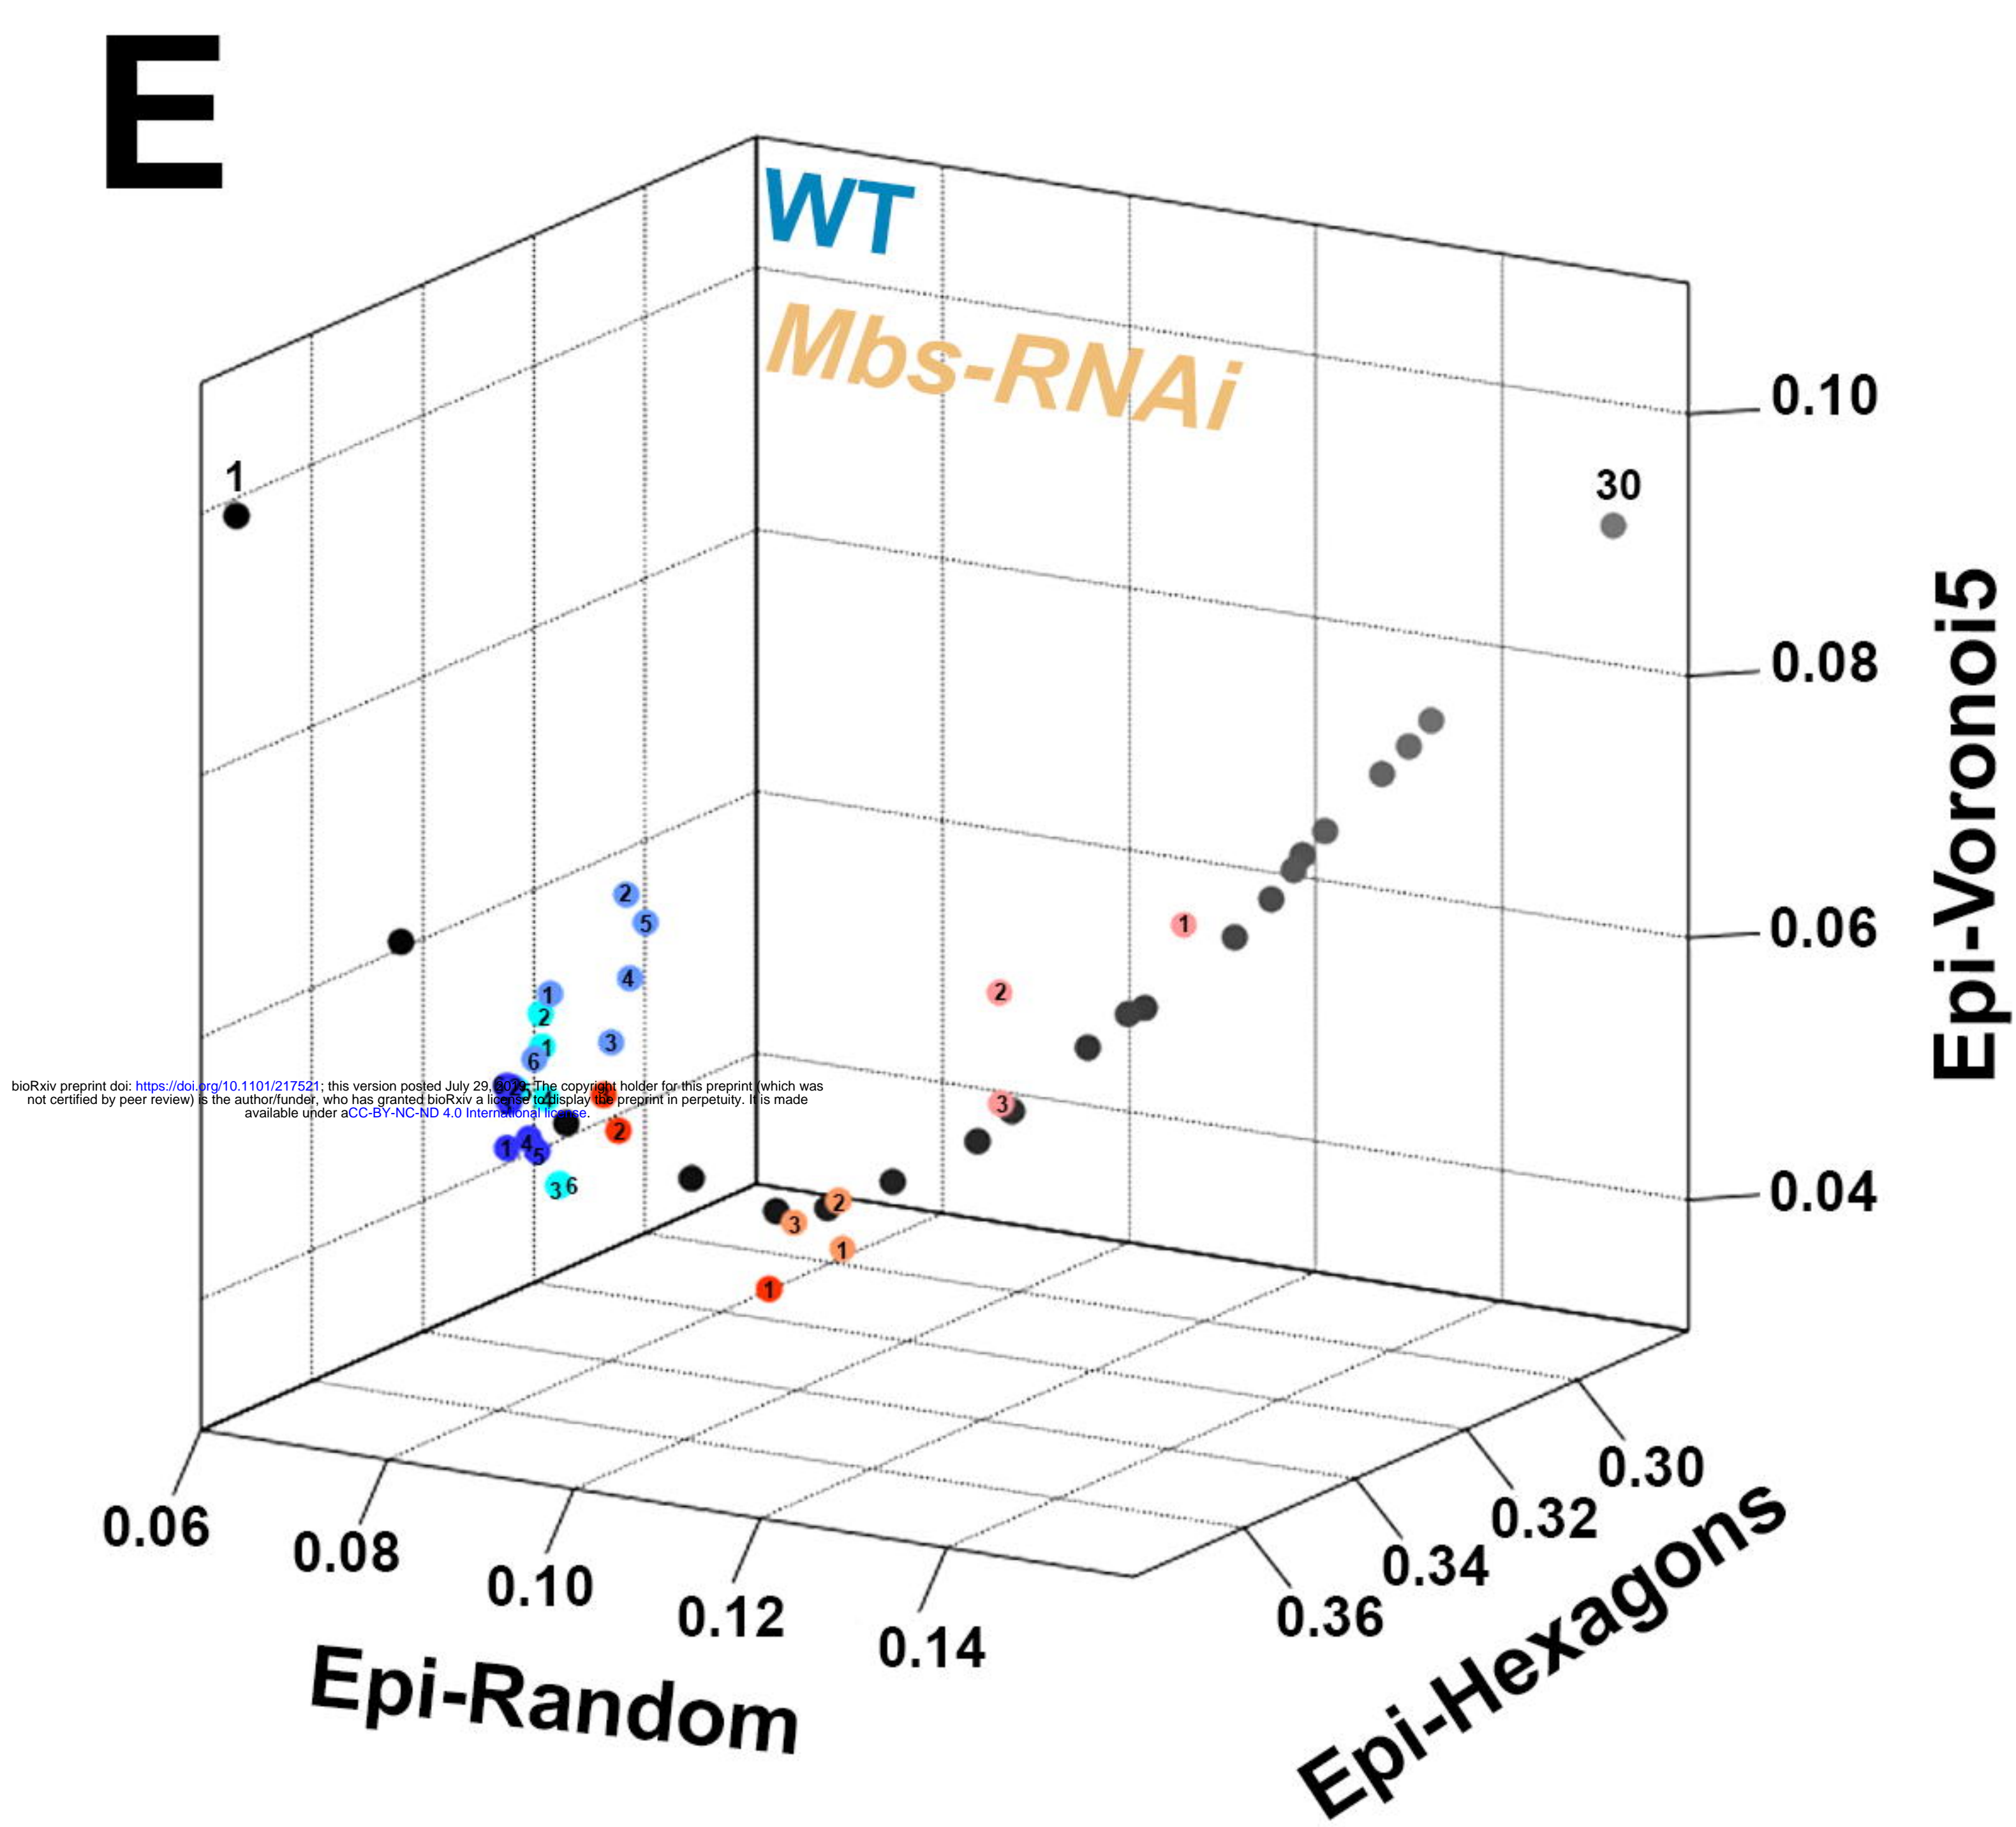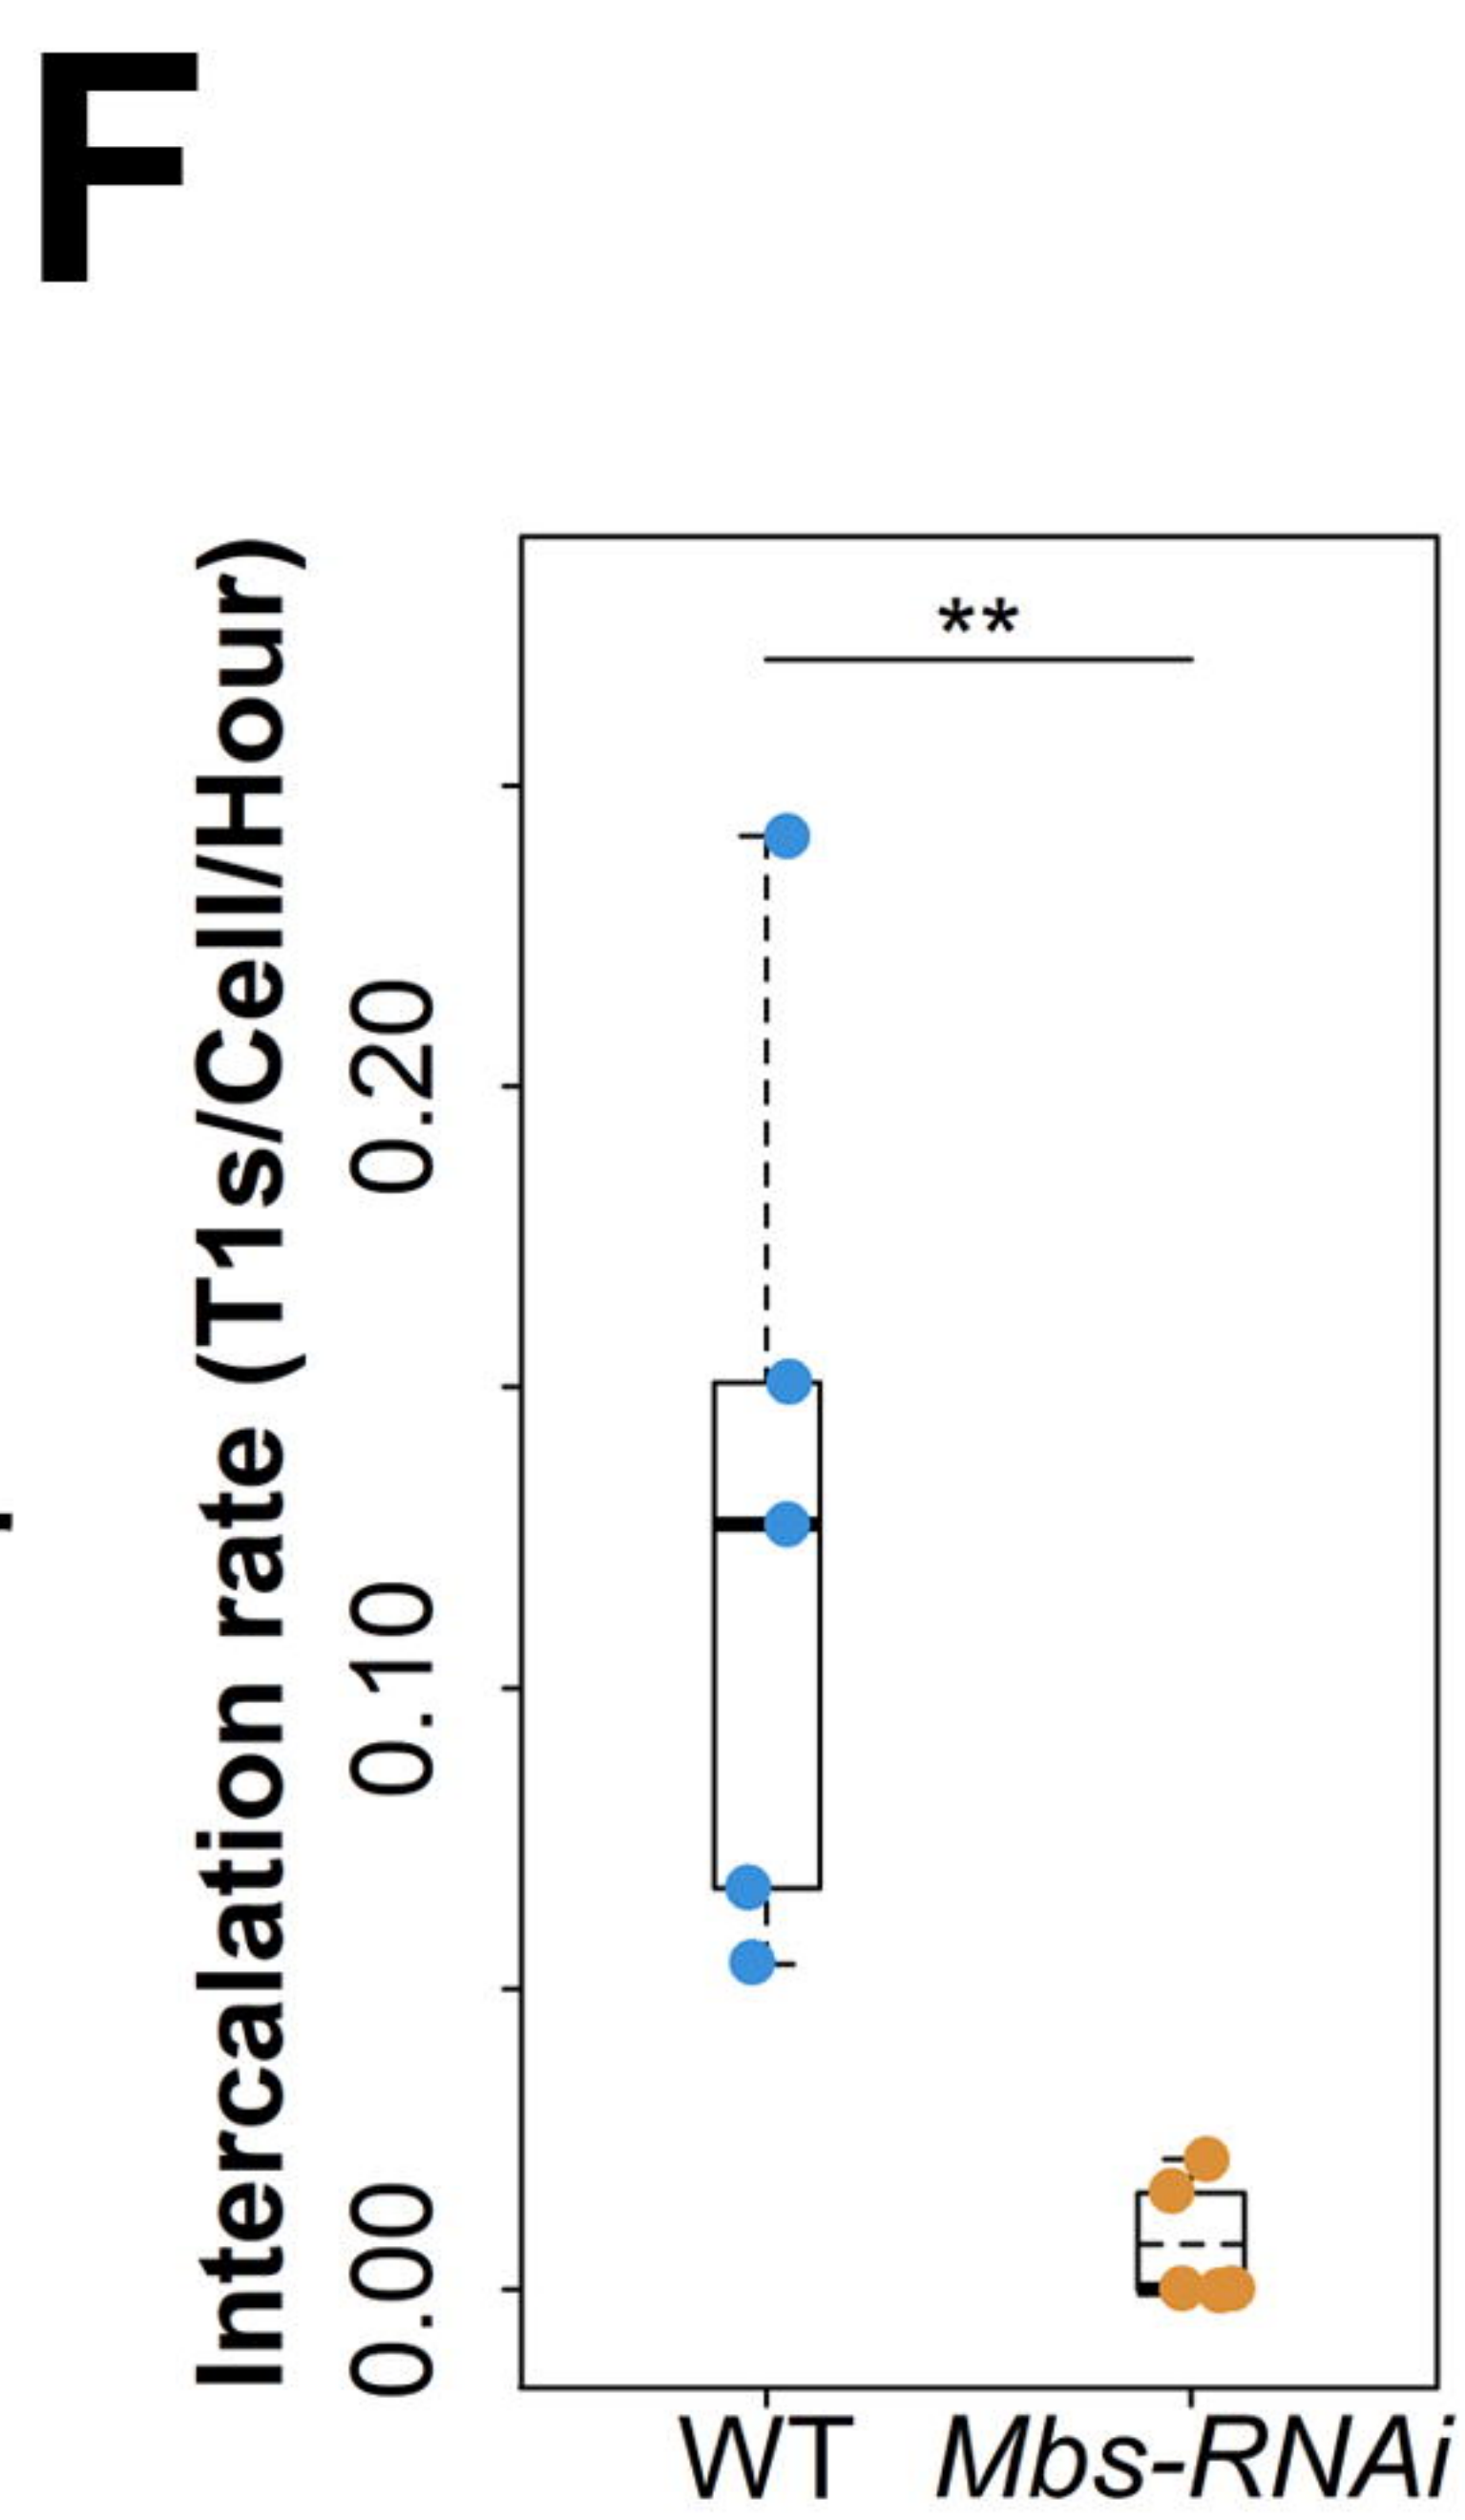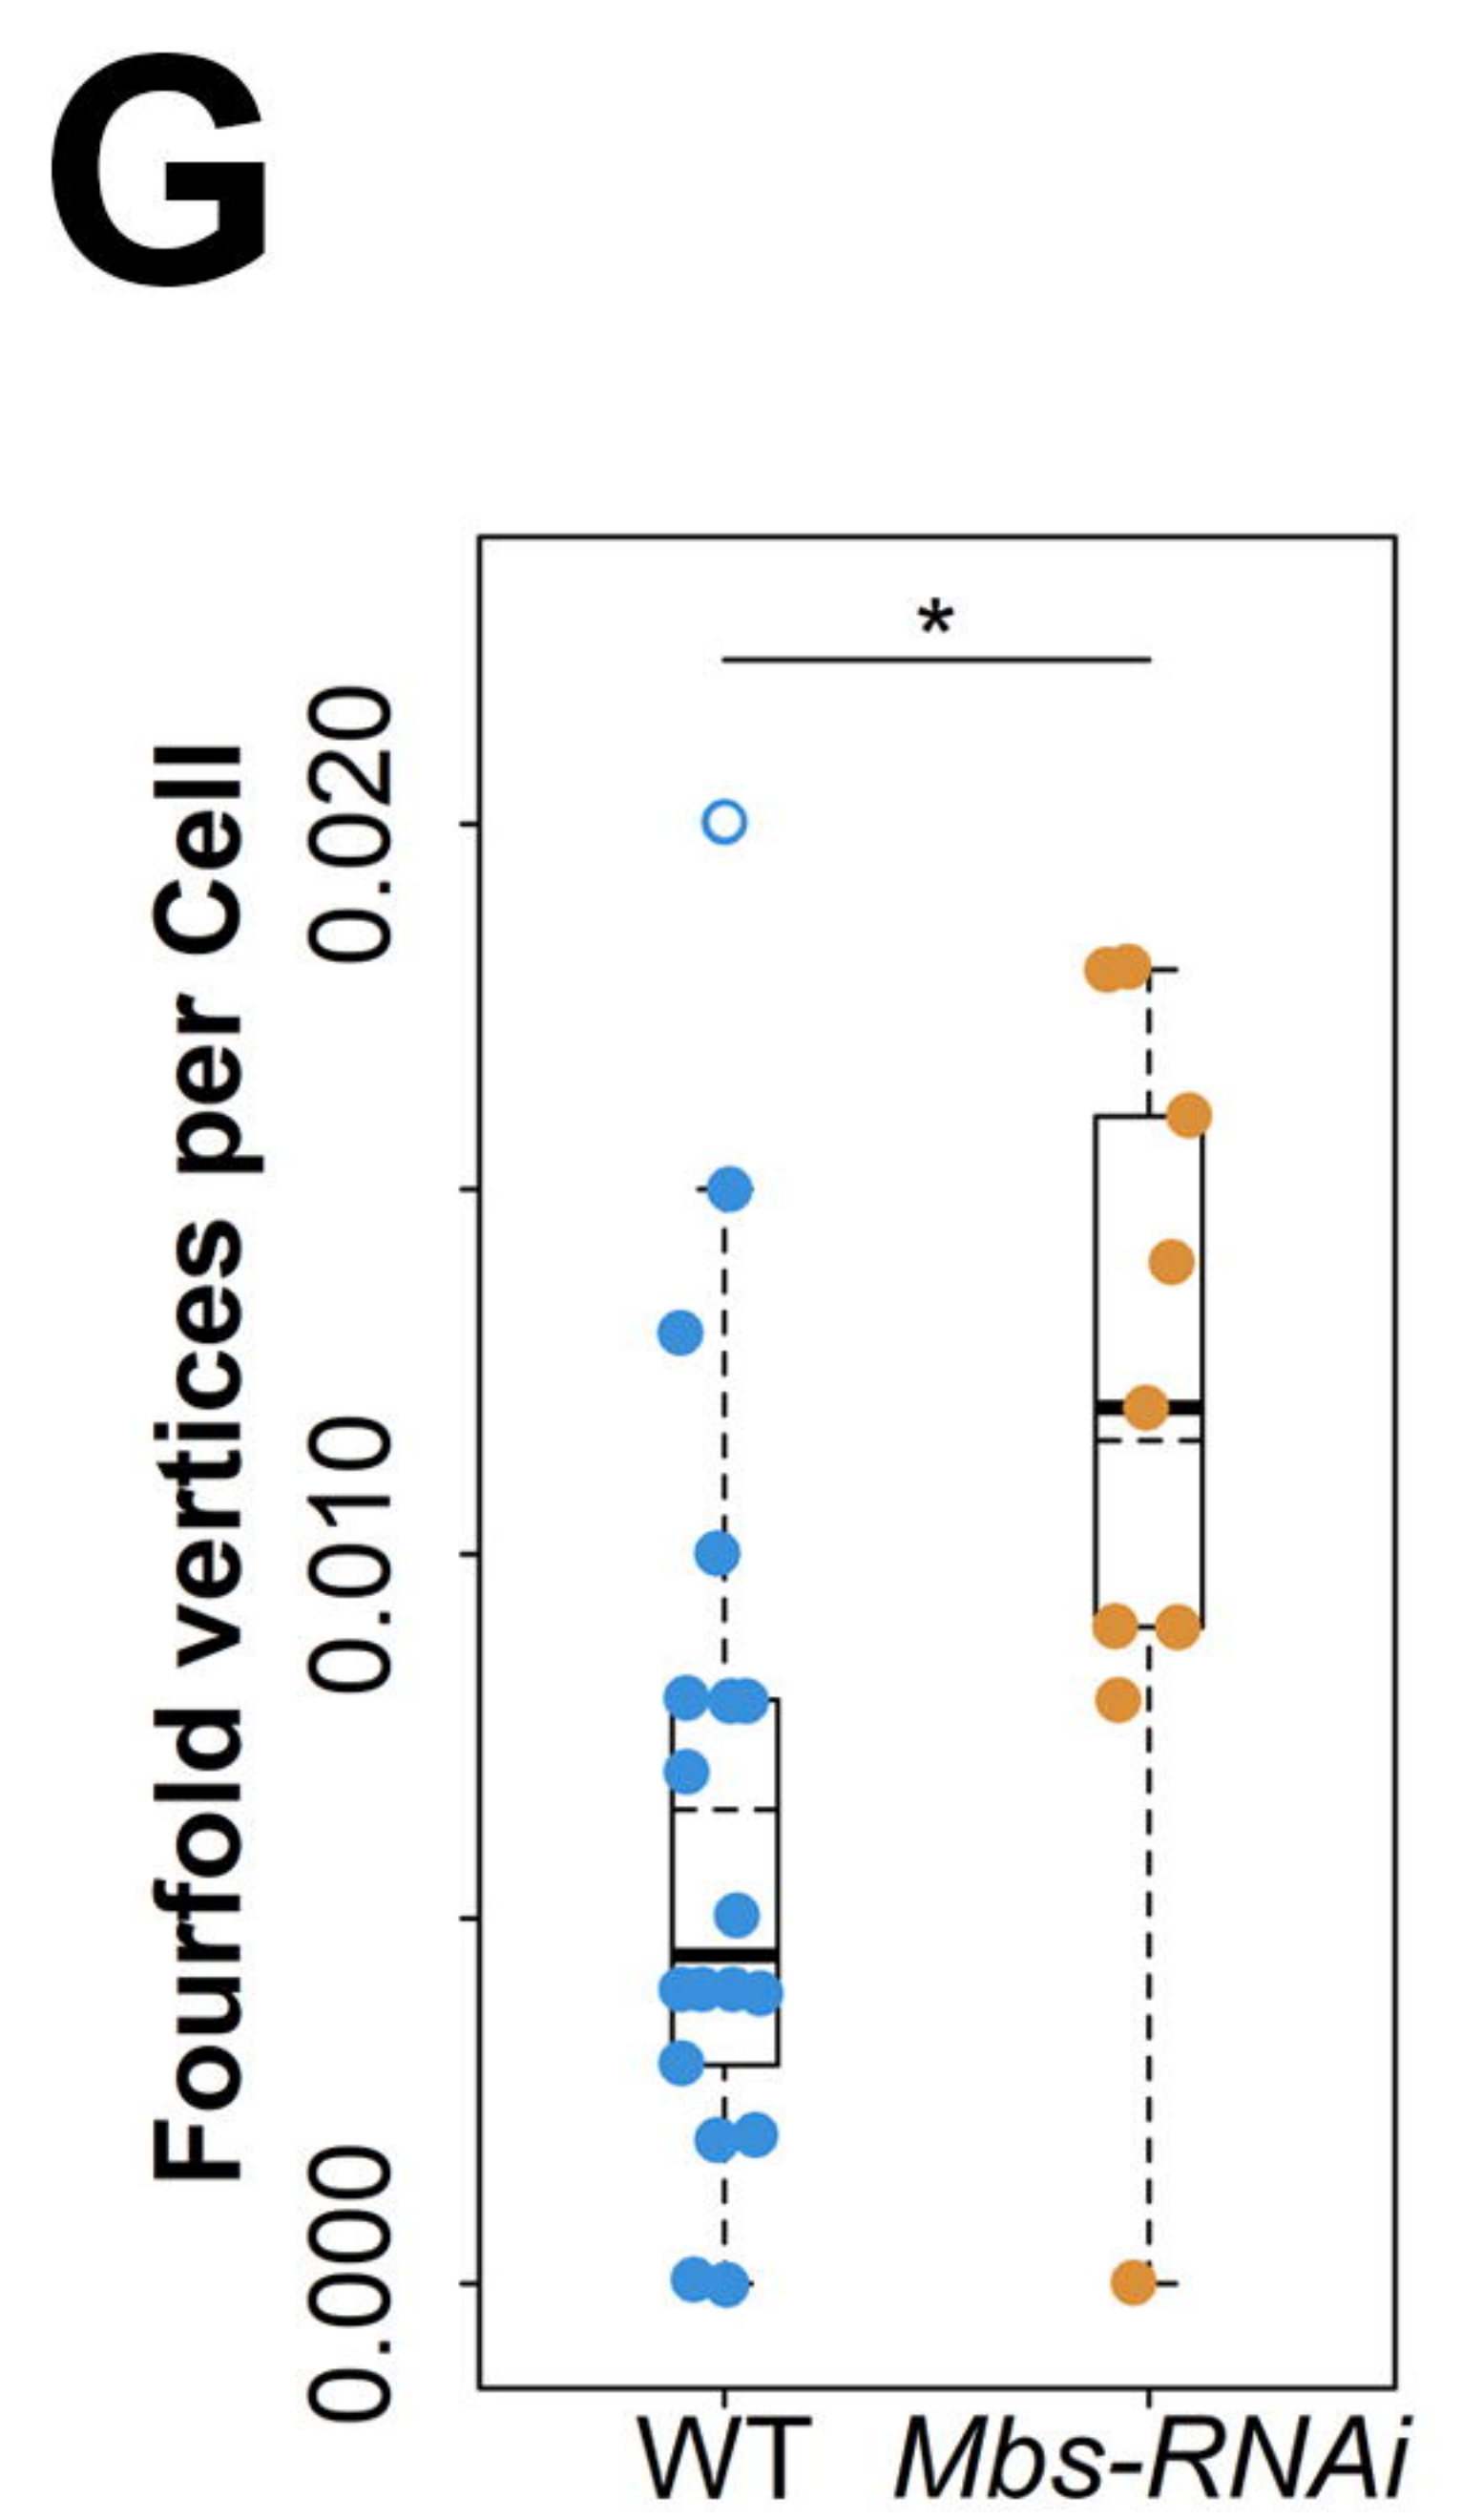

Source: https://www.biorxiv.org/content/10.1101/217521v5.full.pdf
