1 **EpiGraph: an open-source platform to quantify**  
2 **epithelial organization.**

3  
4

5 Pablo Vicente-Munuera<sup>1,†</sup>, Pedro Gómez-Gálvez<sup>1,†</sup>, Robert J.  
6 Tetley<sup>2</sup>, Cristina Forja<sup>1</sup>, Antonio Tagua<sup>1</sup>, Marta Letrán<sup>1</sup>, Melda  
7 Tozluoglu<sup>2</sup>, Yanlan Mao<sup>2,3,\*</sup> and Luis M. Escudero<sup>1,\*</sup>.

8

9 1: Instituto de Biomedicina de Sevilla (IBiS), Hospital Universitario Virgen  
10 del Rocío/CSIC/Universidad de Sevilla and Departamento de Biología  
11 Celular, Universidad de Sevilla. 41013 Seville, Spain.

12 2: MRC Laboratory for Molecular Cell Biology, University College London,  
13 Gower Street, London WC1E 6BT, UK.

14 3: College of Information and Control, Nanjing University of Information  
15 Science and Technology, Nanjing, Jiangsu 210044, China

16

17 †: These authors contributed equally to this work.

18 \*: Corresponding authors: Yanlan Mao ([y.mao@ucl.ac.uk](mailto:y.mao@ucl.ac.uk)) and L.M. Escudero  
19 ([lmescudero-ibis@us.es](mailto:lmescudero-ibis@us.es)).

20

1 **SUMMARY**

2

3 During development, cells must coordinate their differentiation with their  
4 growth and organization to form complex multicellular structures such as  
5 tissues and organs. Healthy tissues must maintain these structures during  
6 homeostasis. Epithelia are packed ensembles of cells from which the different  
7 tissues of the organism will originate during embryogenesis. A large barrier to  
8 the analysis of the morphogenetic changes in epithelia is the lack of simple  
9 tools that enable the quantification of cell arrangements. Here we present  
10 EpiGraph, an image analysis tool that quantifies epithelial organization. Our  
11 method combines computational geometry and graph theory to measure the  
12 degree of order of any packed tissue. EpiGraph goes beyond the traditional  
13 polygon distribution analysis, capturing other organizational traits that  
14 improve the characterization of epithelia. EpiGraph can objectively compare  
15 the rearrangements of epithelial cells during development and homeostasis  
16 to quantify how the global ensemble is affected. Importantly, it has been  
17 implemented in the open-access platform FIJI. This makes EpiGraph very  
18 user friendly, with no programming skills required.

19

## 1 INTRODUCTION

2 The development of any multicellular organism is based on coordinated  
3 changes that transform the embryo into the adult individual. During  
4 morphogenesis and growth, patterning, cell divisions and architectural  
5 changes must perfectly fit together for the correct development of the body  
6 plan. Any morphogenetic movement such as migration, extension or  
7 invagination of epithelial cells is coupled with dramatic changes in the  
8 organization of cells (Bertet et al., 2004; Blankenship et al., 2006; Escudero  
9 et al., 2007; Farhadifar et al., 2007; Girdler and Roper, 2014; Gómez-Gálvez  
10 et al., 2018; Lecuit and Lenne, 2007; Pilot and Lecuit, 2005). After  
11 development, homeostatic tissues must maintain their complex organization  
12 of cells in order to function correctly.

13 How tissues modulate and maintain their organization during development  
14 and homeostasis is an important question that remains unsolved. This is  
15 mainly due to the lack of simple and general methods that can capture and  
16 quantify the arrangement of cells. It has been known for almost a hundred  
17 years that epithelial tissues exhibit a degree of order. The analysis of epithelial  
18 organization has been mainly based on the number of neighbours of the  
19 epithelial cells, considering the apical surface of these cells as convex  
20 polygons with the same number of sides as neighbours. In previous works,  
21 we have investigated several aspects of the organization of packed tissues  
22 using Voronoi tessellations to compare the polygon distributions of natural  
23 and mathematical tessellations (Sanchez-Gutierrez et al., 2016). We have  
24 described that the polygon distribution of natural tessellations is restricted to  
25 a series of frequencies of polygons that match the Voronoi diagrams that  
26 conform to the Centroidal Voronoi tessellation (CVT). This is what we call a  
27 “CVT path” and was used as a scale to compare the organization of different  
28 packed tissues. However, polygon distribution is not sufficient to completely  
29 characterize tissue organization. Tissues with clearly different appearance  
30 can present very similar polygon distribution (Sanchez-Gutierrez et al., 2016).

31 As an alternative approach, we have proposed that Graph Theory could  
32 capture differences in the topology of tissues (Escudero et al., 2011;  
33 Sanchez-Gutierrez et al., 2013; Sánchez-Gutiérrez et al., 2017). This is based

1 on the idea of converting the epithelium into a network of cell-to-cell contacts  
2 (Escudero et al., 2011). The resulting “epithelial graph” can be analysed by  
3 combining the tools of network theory and multivariable statistical analysis  
4 (Escudero et al., 2011; Kursawe et al., 2016; Sanchez-Gutierrez et al., 2013;  
5 Yamashita and Michiue, 2014). This approach has been adapted to analyze  
6 biomedical tissue samples, useful in clinical research and the development of  
7 diagnostic tools (Csikász-Nagy et al., 2013; Guillaud et al., 2010; Sáez et al.,  
8 2013; Sánchez-Gutiérrez et al., 2017). Finding features and patterns that can  
9 describe the graphs is key in many diverse fields, including biology (Benson  
10 et al., 2016; Costa et al., 2007; Hayes et al., 2013). A network can be split up  
11 into different subgraphs named graphlets. The graphlet composition of a  
12 network has been used to quantify differences between complex systems  
13 (Hayes et al., 2013; Ho et al., 2010; Kuchaiev et al., 2011; Pržulj et al., 2004).  
14 These measurements are based on the comparison of the quantity of each  
15 subgraph in different networks, providing an index of distance between them.  
16 This feature has the advantage of integrating the differences between diverse  
17 networks into a single value, simplifying the analyses and allowing multiple  
18 comparisons.

19 In summary, there is a clear need for a method to specifically quantify tissue  
20 organization and aid the interpretation of biophysical and mechanical aspects  
21 of morphogenesis and tissue homeostasis. The advances in imaging  
22 techniques, together with the appearance of powerful methods for automated  
23 image analysis (Heller et al., 2016; Khan et al., 2014; Kursawe et al., 2016;  
24 Schindelin et al., 2012; Weigert et al., 2018) and new simulation resources  
25 (Bi et al., 2016, 2015; Blanchard et al., 2009; Etournay et al., 2016; Fletcher  
26 et al., 2014; Guirao et al., 2015; Mirams et al., 2013; Tanaka et al., 2015)  
27 provide a large amount of good quality source data that can now be analysed  
28 in terms of organization. Here we present an open source platform, EpiGraph,  
29 a new image analysis method that uses segmented images from real epithelia  
30 or simulations, to easily quantify and compare the organization of packed  
31 tissues.

## 32 **RESULTS**

1 **Graphlet measurements as an approach to capture organization of**  
2 **packed tissues.**

3 In previous studies, a set of 29 graphlets was used to distinguish between  
4 different types of networks (Pržulj et al., 2004) (**Fig. S1**). This method  
5 calculated the Graphlet degree Distribution agreement Distance (GDD)  
6 between two networks (Pržulj, 2007). Therefore, the “GDD value”, that in  
7 theory can range from 0 to 1, weighs the differences among the two  
8 distributions of graphlets; the higher the value, the more different the  
9 arrangements (**Fig. S1** and **Methods**). Epithelial images can be considered  
10 as natural tessellations and converted into networks of cell-to-cell contacts  
11 (Escudero et al., 2011). We have used the “graphlet” approach to capture the  
12 topology of epithelial tissues, making a correlation between graphlets and  
13 cellular motifs (compare **Fig. 1A** and **Fig. S1**). Tessellations give rise to  
14 “geographic networks” (Albert and Barabasi, 2002) that only make sense in a  
15 planar surface. For this reason, when we translated the set of graphlets to  
16 cellular patterns, some of them were redundant or not possible (see  
17 methods). Therefore, in this study we have used a total of 26 graphlets  
18 corresponding to 29 different cellular motifs that account for the organization  
19 of groups of up to 5 cells (**Fig. 1A**, **Fig. S1**). Most of the analyses performed  
20 in this work were completed with only 17 motifs (17-motifs, **Fig. 1A**, mauve).  
21 We found that, although all the motifs could be present in an actual tissue,  
22 17-motifs minimized the redundancy of the information provided by the  
23 graphlets. In addition, this set downplays the importance of rare cellular  
24 geometries that could excessively weight GDD calculations (for example, a  
25 high difference in GDD could appear when comparing an image with one or  
26 two quadrilateral cells versus another image with no four-sided cells; this  
27 effect is minimized using 17-motifs). However, it would be possible to use  
28 other combinations such as all the motifs (29-motifs) or cellular motifs that  
29 account for the organization of groups of up to 4 cells (10-motifs) (**Fig. 1A**).

30 **Graphlet measurements capture differences beyond polygon**  
31 **distributions.**

32 We tested the power of graphlet-based measurements in quantifying  
33 differences between sets of images with very similar polygon distributions

1 **(Fig. 1B)**. In third instar larvae of *Drosophila*, the photoreceptors are  
2 specified, giving rise to a particular repetitive arrangement of the presumptive  
3 eye cells (Eye, **Fig. 1C**). This arrangement is very different to the irregular  
4 distribution in a Voronoi tessellation where the initial seeds were placed in a  
5 random way (Sanchez-Gutierrez et al., 2016), (Diagram 1, **Fig. 1C**). We  
6 previously showed that it was not possible to discriminate between the  
7 polygon distributions of these two tessellations (Sanchez-Gutierrez et al.,  
8 2016). Using the graphlets approach, we obtained a GDD value of 0.086  
9 when comparing these two sets of images (17-motifs, **Table S1, Fig. S2**). In  
10 order to know if this difference was biologically relevant, we tried to set a  
11 baseline, by comparing other images with very similar polygon distribution  
12 that also presented an apparently similar arrangement. This was the case for  
13 Diagram 4 of the CVT vs. the *Drosophila* wing imaginal disc in larvae (dWL)  
14 and Diagram 5 of the CVT vs. the *Drosophila* wing imaginal disc in prepupae  
15 (dWP) (**Fig. 1B-C**). Both results were in the same range, with a GDD value of  
16 0.042 for Diagram 4 vs. dWL and 0.049 for Diagram 5 vs. dWP (**Fig. 1C**).  
17 Similar results were obtained when comparing Diagram 4 vs. Diagram 5 and  
18 dWL vs. dWP (**Fig. 1-C**). These results suggested the existence of a baseline  
19 in the range of 0.04-0.05 values that correspond to similar cellular  
20 arrangements that cannot be well distinguished using the graphlets  
21 distribution. Therefore, we interpreted the value of 0.086 obtained in the Eye  
22 vs. Diagram 1 comparison as the reflection of actual differences between  
23 these two sets. In all the mentioned cases, the results obtained using 17-  
24 motifs and 29-motifs were equivalent (**Table S1**).

## 25 **EpiGraph quantitatively compares the organization of multiple sets of** 26 **images.**

27 The GDD had the limitation of comparing only 2 samples each time. Here  
28 we have tried to overcome this limitation evaluating different images  
29 simultaneously using a reference. Therefore, we designed EpiGraph, a  
30 method that calculates the GDD of any epithelial tissue with another  
31 tessellation that serves as a reference. We used three different references: i)  
32 a tessellation formed by regular hexagons, representing the most ordered  
33 way to pave the space (**Fig. 2A**, Epi-Hexagons). ii) the network motifs

1 emerging from a random Voronoi tessellation (**Fig. 2B**, Epi-Random). iii) a  
2 Voronoi Diagram 5 from the CVT path (**Fig. 2C**, Epi-Voronoi5) that presents  
3 a polygon distribution similar to the one from multiple examples in nature  
4 (Gibson et al., 2006; Sanchez-Gutierrez et al., 2016).

5 We tested the method with epithelial images that have been previously  
6 compared with the CVT path in terms of polygon distribution: chicken neural  
7 tube (cNT), dWL, dWP, reduction of myosin II in the *Drosophila* prepupa wing  
8 disc epithelium (dMWP) and Eye (**Fig. 2D**)(Sanchez-Gutierrez et al., 2016).  
9 To have a scale and facilitate fast comparisons, we used the concept of the  
10 CVT path (Sanchez-Gutierrez et al., 2016). We calculated the GDD values  
11 for Epi-Hexagons, Epi-Random and Epi-Voronoi5 for all the Voronoi diagrams  
12 and visualized these results with respect to the percentage of hexagons of  
13 the corresponding diagram (the percentage of hexagons is indicative of the  
14 proportions of the different types of polygons along the CVT, **Table S2**).  
15 However, the CVT does not progress beyond the 70% of hexagons limiting  
16 the possibilities of analysis. Therefore, we extended the Voronoi scale  
17 spanning a wider range of polygon distributions. The algorithm that devises  
18 the CVT was modified to introduce “noise” in the positioning of the seed that  
19 produces the subsequent diagram. In this way, we obtained a “CVT noise”  
20 (CVTn) whose last diagrams reached 90% of hexagons (**Fig. 2E-G**, **Fig. S3**  
21 and **Material and methods**). Interestingly, the plot obtained using CVT and  
22 CVTn diagrams was an optimum way to easily visualize these geometric  
23 scales as a continuous “CVT path” and a “CVTn path”. Therefore, we used  
24 this framework to analyse the values of Epi-Hexagons, Epi-Random and Epi-  
25 Voronoi5 for each diagram in the scale. As expected, the Epi-Hexagons  
26 values were higher in the initial diagrams and progressively decreased with  
27 the increase in the percentage of hexagons of the Voronoi diagrams (**Fig. 2E**,  
28 **left panel**). The opposite happened in the case of the Epi-Random values  
29 (**Fig. 2E**, **central panel**). In the plot of percentage of hexagons vs Epi-  
30 Voronoi5, the CVTn path presented the shape of a walking stick (**Fig. 2E**,  
31 **right panel**). The Epi-Voronoi5 values of Voronoi Diagrams 1, 2, 3, and 4  
32 were decreasing progressively, with Diagram 5 the closest to the zero value.

1 The values for the rest of the diagrams gradually increased, as in the case of  
2 the Epi-Random.

3 We then plotted the values for the actual epithelia. We found that for cNT,  
4 dWL and dWP the Epi-Hexagons, Epi-Random and Epi-Voronoi5 values were  
5 similar to the CVTn at the same percentage of hexagons of the polygon  
6 distribution (**Fig. 2E**). In agreement with our previous results using the GDD,  
7 the Eye images presented a higher Epi-Random and Epi-Voronoi5 values  
8 than the expected for a 30% of hexagons (**Fig. 2E**). The differences with  
9 respect to the CVTn were even more clear when plotting Epi-Hexagons vs  
10 Epi-Random and Epi-Random vs Epi-Voronoi5 (**Fig. 2F-G**). We obtained  
11 similar results when analysed the dMWP set of images. In this case, our  
12 previous work showed a small deviation of the dMWP polygon distribution  
13 with respect the CVT (Sanchez-Gutierrez et al., 2016). However, using  
14 EpiGraph, we observed that Epi-Random and Epi-Voronoi5 captured the clear  
15 differences in organization between these images and the CVTn (**Fig. 2E-G**,  
16 **Fig. S4**). These results suggested that EpiGraph is able to distinguish  
17 between different tessellations with a similar polygon distribution. In this  
18 regard, we have developed a statistical output using an outlier detection  
19 approach whose quantitative results represent how similar the organization  
20 of a tissue is when compared with the CVTn scale (**Fig. S3** and **Material and**  
21 **methods**). The test confirmed that cNT, dWL, and dWP were close to the  
22 CVTn and similar to the Voronoi diagrams 1, 4, and 6 respectively. In contrast,  
23 the Eye and dMWP samples were labelled as different (**Table S3**). In this way,  
24 EpiGraph provides a quantitative description of tissue organization.

### 25 **EpiGraph can capture different organization traits.**

26 We further investigated the possible applications of EpiGraph and  
27 performed a series of experiments aimed at understanding what traits of  
28 tissue organization are being captured and quantified by the graphlet  
29 measurements. To this end, we have used images of different vertex model  
30 simulations that alter tissue organization by changing the biophysical  
31 properties of the cells (images taken from (Sanchez-Gutierrez et al., 2016)  
32 (**Material and methods** and **Fig. 3A-F**).



1 First, we analysed samples with 10% of the cells having increased effective  
2 cell-cell adhesion (**Material and methods, Fig. 3B**). This feature induced the  
3 formation of cells with a “quadrilateral shape” that often organized in motifs  
4 presenting four-way vertex configurations. These images were compared with  
5 simulations in which “elongated” cells appear (by simultaneously increasing  
6 cell-cell adhesion and reducing ideal area, **Material and methods and Fig.**  
7 **3C**). Epigraph analysis indicated that while control simulations gave similar  
8 values to the CVTn, the “squared” and “elongated” sets of images were  
9 different to the control and well separated from the CVTn. However,  
10 EpiGraph failed to find clear differences between the “squared” and  
11 “elongated” images (**Fig. 3G and Fig. S5**).

12 Second, we used a set of conditions to mimic the effect of a reduction of  
13 myosin II in the *Drosophila* prepupa wing disc epithelium (dMWP, **Fig. 2D**). In  
14 the control simulation (**Fig. 3D**), cells grow to double the original area and  
15 then divide into two cells. In case III and case IV simulations there was a  
16 random reduction of the tension parameter together with a requirement of a  
17 minimum tension threshold to be able to divide (**Fig. 3E-F**). If the cells do not  
18 reach this threshold, they continue to grow without dividing the cell body.  
19 When this happens, the cells will be stuck in mitotic phase and will not start a  
20 second round of cell division (Sanchez-Gutierrez et al., 2016) (**Material and**  
21 **methods**). The control simulation gave similar values to the CVTn, while case  
22 III, case IV and dMWP images presented a clear deviation in the Epi-Random  
23 vs Epi-Voronoi5 graph (**Fig. 3G**). All these data-points distributed in the same  
24 zone of the graph. Interestingly, we found that both sets of simulations  
25 (squared and elongated vs Case III and Case IV) appeared in two  
26 complementary regions, suggesting that the regions in the graph can reflect  
27 the existence of different traits of organization in each condition (**Fig. 3G**).

## 28 **EpiGraph: a method to capture epithelial organization implemented in** 29 **FIJI.**

30 Aiming to enhance the accessibility of the analysis of tissue organization to  
31 the biology community, we have implemented EpiGraph as a plugin for FIJI  
32 (Schindelin et al., 2012). EpiGraph consists of a pipeline of 5 very simple  
33 steps. First, the skeleton of an epithelial image is uploaded and the individual

1 cells are identified. Second, the user selects the distance threshold to identify  
2 two cells as neighbours. Here it is possible to select different thresholds and  
3 to check the number of neighbours of every cell in each case. Third, a ROI is  
4 selected. There are several possibilities such as a default ROI from the image  
5 or the selection of individual cells. Fourth, the graphlet information for the  
6 selected cells is calculated. These data are used to obtain the Epi-Hexagons,  
7 Epi-Random and Epi-Voronoi5. These values are incorporated into a table  
8 and serve as input data for a statistical analysis that indicates if a new image  
9 is inside or outside of the CVTn path and describes which Voronoi diagram  
10 presents the most similar organization to the sample (**Material and**  
11 **methods**). The fifth step includes the classification and labelling of different  
12 images in order to represent them in a new window. This final phase allows  
13 one to export the representation of the data in a three-dimensional graph.  
14 **Movie S1** shows an example of EpiGraph usage. A detailed description of  
15 EpiGraph can be found in the **Supplementary Material and methods**. A full  
16 set of tutorials explaining how to install and use EpiGraph is available at  
17 EpiGraph's wiki (<https://imagej.net/EpiGraph>).

## 18 **EpiGraph provides biological insights regarding homeostasis and** 19 **tissue fluidity transitions**

20 Epithelial tissues have the ability to behave as a fluid due to cellular  
21 rearrangements or to solidify as cellular rearrangements cease (Bi et al.,  
22 2016, 2015). The shape index is a characteristic of epithelial cells that has  
23 been shown, in vertex model simulations, to be able to capture the degree of  
24 rigidity, or fluidity, of a tissue (Bi et al., 2015). This study established the  
25 transition point between a soft (fluid) and a rigid (solid) tissue, described as a  
26 jamming transition, at the dimensionless shape index value of 3.81. We  
27 calculated the shape index for the CVTn path, finding that from Voronoi  
28 diagrams 1 to 20, the tessellations were behaving as a fluid (from diagram 21  
29 to 700 they behave as solid). Using this descriptor, all the images of biological  
30 tissues were placed in the fluid part as well as the four altered vertex model  
31 simulations shown in **Fig. 3 (Fig. S4, Fig. S5, Fig. S6 and Table S4)**.

32 We have investigated the dynamics of epithelial jamming in different  
33 conditions. First, to test the capabilities of EpiGraph in this regard, we

1 analysed several snapshots from two simulations published by Bi and  
2 colleagues as supplementary movies (Bi et al., 2016). These videos show the  
3 movements of cells in two conditions: rigid state (shape index less than 3.81)  
4 and soft state (shape index greater than 3.81) (**Fig. 4A**). As expected, the  
5 snapshots of the soft tissue analysed appeared in different positions,  
6 indicating that the simulated epithelia changed its organization during the  
7 experiment. On the other hand, the different frames from the rigid simulation  
8 were clustered (**Fig. 4B**), showing little cell rearrangements.

9 We next tested whether EpiGraph could detect changes in tissue fluidity in  
10 real epithelia, which may be more ambiguous and noisier than simulations.  
11 Real tissues also display fluid-to-solid jamming transitions which are  
12 important for large scale tissue shape changes as well as for refining and  
13 maintaining tissue shape (Curran et al., 2017; Mongera et al., 2018). In the  
14 *Drosophila* pupal notum, the level of tissue fluidity is controlled by the global  
15 level of myosin II activity (Curran et al., 2017). We wondered if the regulation  
16 of myosin II could similarly impact on the fluidity state of the wing disc  
17 epithelium and the cell rearrangements that have been described during the  
18 late stages of normal wing disc development, where the overall tissue shape  
19 does not dramatically change (Heller et al., 2016) (**Fig. 4C**). To this end, we  
20 compared the WT organization with the effect of increasing myosin II activity  
21 by knocking down Mbs (Myosin binding subunit of the myosin phosphatase,  
22 which dephosphorylates myosin regulatory light chain, **Fig. 4D**) by RNAi  
23 throughout the entire wing pouch. Based on work in the pupal notum (Curran  
24 et al., 2017), we would predict that *Mbs-RNAi* discs behave as solids.  
25 Interestingly, in the two cases, the shape index was greater than the  
26 described shape index threshold of 3.81, suggesting that both tissues are in  
27 a fluid state (**Fig. S6**).

28 We used EpiGraph to analyse the changes in organization of wing discs with  
29 perturbed myosin II activity along time and compared them with a WT  
30 condition. The snapshots for WT samples appeared clustered in the 3D  
31 graph, indicating that the epithelia were not changing their organization during  
32 the 30 minutes of analysis (**Fig. 4E**), despite previous work showing that cell  
33 intercalations do occur (Heller et al., 2016). This suggests that during this

1 slow growing phase of wing disc development, any cell rearrangements that  
2 occur do not drive large-scale morphogenesis, but act to maintain a  
3 homeostatic tissue topology. The statistical analysis confirmed that all of the  
4 WT wing discs were close to CVTn diagrams 3 and 4 (**Table S3**). In the case  
5 of the three samples from the *Mbs-RNAi* genotype, the data points presented  
6 different organizations (from similar to diagram 3 to close to diagram 13, see  
7 **Table S3**). In some cases, the dispersion was not only between samples, but  
8 occurred between images from each movie (**Fig. 4E** and **Table S3**). EpiGraph  
9 therefore predicted that these *Mbs-RNAi* wing discs are behaving very  
10 differently from WT wing discs, likely by changing their degree of fluidity.  
11 Accordingly, quantification of intercalation rates demonstrated that cell  
12 rearrangements happen significantly more frequently in WT than in *Mbs-RNAi*  
13 wing discs (**Fig. 4F**,  $0.1281 \pm 0.08$  vs.  $0.0076 \pm 0.01$  intercalations/cell/hour,  
14 Kolmogorov-Smirnov test,  $p=0.0079$ ). As predicted, this resulted in more cells  
15 ‘jamming’ at 4-way vertex configurations as they fail to complete intercalations  
16 (**Fig. 4G**,  $0.0065 \pm 0.005$  vs.  $0.0116 \pm 0.006$  fourfold vertices/cell, Kolmogorov-  
17 Smirnov test,  $p=0.029$ ). Interestingly, EpiGraph was able to detect this  
18 solidification of the tissue in the *Mbs-RNAi* discs, even though the shape index  
19 predicted a fluid tissue. Taken together, these results indicate that the  
20 quantification of tissue organization using EpiGraph can infer information  
21 about the fluidity of a tissue from several fixed snapshots, without the need to  
22 laboriously track individual frames of a time-lapse video.

23

## 24 **DISCUSSION**

25 Textbook definitions of morphogenesis include the term “organization” as  
26 key to explaining this fundamental developmental process (Dai and Gilbert,  
27 1991). The authors wondered, “How can matter organize itself so as to create  
28 a complex structure such as a limb or an eye?”. Later, changes in organization  
29 of adult tissues can reflect pathological traits due to defects in homeostasis  
30 (Csikász-Nagy et al., 2013; Soto and Sonnenschein, 2011). Here, we have  
31 provided a tool that can help to investigate these questions.

1 The analysis of the polygon sides of epithelial cells has been shown to be  
2 insufficient to completely understand tissue organization. Some tessellations  
3 can present very different arrangements yet have the same frequencies of  
4 number of neighbours. A second problem is the lack of a simple value as an  
5 indicator of epithelial organization. This feature complicates the comparison  
6 between morphogenesis of normal development and that of genetically  
7 perturbed or diseased tissues. Our previous attempts to overcome this  
8 caveat were based on multi-statistical analyses of graph features (Sanchez-  
9 Gutierrez et al., 2013) and the creation of a Voronoi scale to statistically  
10 compare groups of images with the CVT reference (Sanchez-Gutierrez et al.,  
11 2016). Several recent works cover part of these integrative analyses  
12 (Blanchard, 2017; Blanchard et al., 2009; Farrell et al., 2017; Guirao et al.,  
13 2015; Jackson et al., 2017). However, we are aware that all these methods  
14 are difficult to incorporate into the average biology or biomedicine lab.

15 We have developed EpiGraph, aiming to bring an easy way to quantify  
16 tissue organization without the requirement for programming skills. EpiGraph  
17 transforms the image into a graph of cell-to-cell contacts and extracts their  
18 graphlet content to later compare with other images. These complex  
19 algorithms are hidden behind the friendly user window of FIJI. This is the  
20 most popular open-source biological image analysis platform. In addition, the  
21 output data options of EpiGraph facilitate fast and clear representations and  
22 interpretations of the results.

23 One of the strengths of EpiGraph is the comparison of any tessellation with  
24 the hexagonal lattice, the “random” Voronoi tessellation and the Voronoi  
25 tessellation that presents the “conserved polygon distribution” (Gibson et al.,  
26 2006; Sanchez-Gutierrez et al., 2016) (**Fig. 2A-C**). We have tested EpiGraph  
27 with different types of samples: as expected, the average of the natural  
28 tessellations such as wing imaginal disc (dWL and dWP) or the chicken neural  
29 tube (cNT) matched the CVTn path position (**Fig. 2D-G**). We interpret that  
30 these three natural samples present similar polygon distributions and graphlet  
31 compositions to some Voronoi Diagrams from the CVTn. On the other hand,  
32 the average of the Eye samples appeared far from the CVTn when Epi-  
33 Voronoi5 or Epi-Random values were plotted (**Fig. 2D-G**). These two

1 references were capturing differences in organization between the Eye and  
2 any Voronoi Diagram (including Diagram 1, which presents a similar polygon  
3 distribution to the Eye). This result supports the utility of EpiGraph to quantify  
4 organizational traits that were not accessible until now. The same idea is  
5 reinforced by the results obtained with the mutant samples for myosin II  
6 (dMWP, **Fig. 2D-G**). In previous work, we showed that this set of samples  
7 slightly deviated the CVT scale in terms of polygon distribution (Sanchez-  
8 Gutierrez et al., 2016). Here we show very clear differences in terms of the  
9 values of Epi-Voronoi5 and Epi-Random (**Fig. 2G**), suggesting a higher  
10 sensitivity of the new method when capturing differences in organization.

11 The output images from EpiGraph show the CVTn path as a clear  
12 reference for proliferative epithelia such the wing imaginal disc or the chicken  
13 neural tube and for vertex model control simulations. We have incorporated  
14 a statistical test into EpiGraph that indicates if a new tissue is within or outside  
15 of the CVTn path, and which is the Voronoi diagram with the closest  
16 organization. The different results comparing Epi-Hexagons, Epi-Random  
17 and Epi-Voronoi5 values also suggested that Epi-Hexagons had better  
18 resolution for images with a higher percentage of hexagons while Epi-  
19 Random and Epi-Voronoi5 were more sensitive to the differences between  
20 images with less than 40% of hexagons. For this reason, we have designed  
21 the visualization step of the program to easily change the three axes and  
22 check the different results using any combination of these GDD references  
23 and the “percentage of hexagons”.

24 Using different sets of simulations, we are able to distinguish two different  
25 types of organization: The cases where a subset of cells adopts a particular  
26 arrangement inside a mostly ordered tissue (**Fig 3B, C, G**) and the cases  
27 where the global topology of the tissue is altered and the cell sizes are very  
28 heterogeneous (**Fig. 3E-G** and **Fig. S5**). These two patterns create a “map”  
29 of arrangements that are out the CVTn, and they will help to other researchers  
30 to study the degree of order in their samples.

31 The dynamics of the transition between a tissue behaving as a fluid or a  
32 solid is an emerging problem in developmental biology and biomedicine  
33 (Curran et al., 2017; Firmino et al., 2016; Mongera et al., 2018; Park et al.,

1 2015; Petridou et al., 2018; Tetley and Mao, 2018). We have used the  
2 capabilities of EpiGraph to study how the fluidity state can affect the  
3 organization of a tissue. The utility of EpiGraph in this regard is supported by  
4 its ability to quantify dynamic changes in organization due to cell  
5 rearrangements in a vertex model simulation of a soft tissue (**Fig. 4A-B**).  
6 Therefore, in these simulations, cell movements are captured as changes in  
7 the organization of the tissue by EpiGraph. However, cell rearrangements do  
8 not necessarily have to lead to changes in tissue organization, as is often the  
9 case in more homeostatic tissues. Although, it has been shown that the late  
10 third instar *Drosophila* imaginal disc can exchange neighbours and rearrange  
11 during development (Heller et al., 2016), we were not able to see changes in  
12 organization combining live imaging of the WT discs and EpiGraph analysis  
13 (**Fig. 4E**). Therefore, we interpret that the multiple re-arrangements of the WT  
14 disc conserve the organization of the tissue, at least in the time framework  
15 analysed (30 min). On the contrary, the hyperactivation of myosin II (*Mbs*-  
16 *RNAi*) produced a clear change in the organization of the tissue as detected  
17 by EpiGraph. The decrease of intercalation rate and the increase of fourfold  
18 vertices in the *Mbs-RNAi* discs suggest that EpiGraph is capturing a change  
19 in tissue fluidity (**Fig. 4E-G**). In this respect, we think that EpiGraph analyses  
20 provide information beyond previous parameters that have been used to  
21 capture the fluidity in cell arrangements such as the shape index (Bi et al.,  
22 2015). All the real images analysed in this work have a high shape index (**Fig.**  
23 **S6**). These samples include the *Mbs-RNAi* mutant discs, that do not  
24 intercalate. Altogether, our results suggest that the shape index is not a  
25 sufficient parameter to define fluidity from a still image of a real sample.

26 In biomedicine, a robust and efficient analysis of histopathological images is  
27 required. Computerized image tools have an enormous potential to improve  
28 the quality of histological image interpretation, offering objective analyses that  
29 can aid the pathologist's diagnoses. Changes in organization have proven to  
30 be related to the onset of disease in very different contexts, being critical for  
31 early detection (Emmanuele et al., 2015; Guillaud et al., 2010; Park et al.,  
32 2015; Sáez et al., 2013; Tsuboi et al., 2018). We propose that EpiGraph is  
33 able to efficiently detect mutant phenotypes related to changes in

1 organization and/or in tissue fluidity. Importantly, this can be done from a few  
2 snapshots in time, without the need for sophisticated time-lapse imaging and  
3 tracking. This may provide a simple detection tool for the early onset of  
4 disease, where changes in organization can occur, and only limited tissue  
5 samples are available from patients.

### 6 **EpiGraph limitations.**

7 Although EpiGraph accepts a wide range of images as inputs, we have  
8 specified some minimum requirements. It is not recommended to use input  
9 images bigger than 3000 pixels of width or 3000 pixels of height, since  
10 processing them could be computationally intensive. In addition, EpiGraph  
11 only accepts single images. Images from time series should be adapted to  
12 single frames before uploading them to EpiGraph.

13 Computers with little RAM memory (less than 16gb) will work but with a  
14 series of restrictions. To ensure usability, it is not recommended computing  
15 images with a high number of cells (more than 1000) due to a possible lack  
16 of memory. In the same way, we suggest skeletonizing the edges of the  
17 images and using a small radius, i.e. 3 pixels of radius for skeletonized image  
18 (we recommend don't overpass a radius value of 10 pixels to avoid  
19 overloading the system) to calculate the cells neighbourhood. Choosing a  
20 high radius value could slow down the work queue, increasing the use of RAM  
21 memory.

22 If any of these requirements are not satisfied, the program alerts the user,  
23 allowing him/her to change the image provided. Importantly, the images and  
24 ROIs require a minimum number of valid cells (cells without touching the  
25 borders or an invalid region of the image) in order to get coherent graphlets.  
26 Therefore, to get any result, EpiGraph must detect at least a 3-distance valid  
27 cell (see **Fig. 2**) in the case of 7-motifs or 10-motifs or a 4-distance valid cell  
28 (see **Fig. 2**) in the case of 17-motifs and 29-motifs. In any case, we strongly  
29 recommend having a greater number of 3-distance and 4-distance valid cells  
30 to get results that can be trusted in terms of capturing the organization of a  
31 tissue. Regarding the 3D visualization tool, it allows the user to see the  
32 position of the samples from different angles. However, the resolution of the  
33 exported file is only 72 pixels per inch (dpi). This could be too low for



1 publications and therefore EpiGraph provides an excel table with all the  
2 information needed to represent it with other programs.

3 In summary, we have generated a very accessible, open source method to  
4 produce a quantitative description of developmental events. This quantitative  
5 aspect is reinforced by the statistical comparison with the CVT path that  
6 serves as a scale for tissue organization. We anticipate that our tool will  
7 improve the study of tissue dynamics and morphogenesis by permitting the  
8 comparative analysis of epithelial organization in genetically mutated or  
9 diseased tissues during time.

10

## 1 MATERIAL AND METHODS

2

### 3 Source images used in the study.

4

#### 5 Centroidal Voronoi Tessellation (CVT) diagrams and variations

6 For the generation of this set of paths we have used the software Matlab  
7 R2014b to iteratively apply Lloyd's algorithm to a random Voronoi tessellation  
8 (Lloyd, 1957). This implies that the centroid of a cell in a Voronoi diagram is  
9 the seed for the same cell in the next iteration.

#### 10 - *Centroidal Voronoi Tessellation (CVT) diagrams*

11 Centroidal Voronoi Tessellation diagrams were obtained as described  
12 previously by our group (Sanchez-Gutierrez et al., 2016). The 20 original  
13 Voronoi diagrams were created placing 500 seeds randomly in an image of  
14 1024x1024 pixels. A total of 700 iterations were generated for each initial  
15 image.

#### 16 - *Centroidal Voronoi Tessellation noise (CVTn) diagrams*

17 We have developed a variation of the CVT path, named the CVT noise  
18 (CVTn) path (**Fig. S3**). We started from the same 20 initial random diagrams  
19 described above. The development process of the CVTn path was modified  
20 so that the new seeds were not strictly the centroid from the previous iteration.  
21 In even iterations, we selected a region of 5 pixels of radius from the centroid  
22 position, in which seeds could be placed randomly. In odd iterations, the  
23 system was stabilized, applying the original Lloyd algorithm. A total of 700  
24 iterations were generated for each initial image.

#### 25 Natural packed tissues and vertex model simulations

26 The details of the obtaining and processing of the epithelial images were  
27 described in (Escudero et al., 2011). Control vertex model simulations include  
28 cell proliferation and are the basis for the other two cases. Case III  
29 corresponds to a vertex model simulation with heterogeneous reduction of  
30 line tension and an impairment of cell division when tension value is under 30  
31 percent of the initial value. Case IV is a similar simulation to Case III with a  
32 threshold of 40 percent. Regarding simulations with no cell proliferation, as a  
33 baseline, the control had homogeneous parameters for contractility, line

1 tension and ideal area. ‘Elongated’ simulations were as the control, but with  
2 ten percent of cells having a reduced line tension and ideal area, while  
3 ‘squared’ ones had ten percent of cells with only line tension reduced. The  
4 exact conditions for the vertex model simulations were described in  
5 (Sanchez-Gutierrez et al., 2016).

## 6 Perturbing myosin II activity in *Drosophila* wing discs and calculating 7 intercalation rates

8 *Drosophila* were raised in standard conditions. Wing discs were dissected  
9 from third instar larvae and cultured under filters as described by (Zartman et  
10 al., 2013). Discs were cultured in Shields and Sang M3 media supplemented  
11 with 2% FBS, 1% pen/strep, 3ng/ml ecdysone and 2ng/ml insulin. The  
12 following alleles and transgenes were used; *shg*-GFP (Ecad-GFP, Huang et  
13 al., 2009), *UAS-Mbs-RNAi* (KK library, VDRC), *rn*-GAL4 (RMCE-MiMIC  
14 Trojan-GAL4 collection). The following experimental genotypes were used;  
15 Ecad-GFP (WT) and Ecad-GFP/*UAS-Mbs-RNAi*; *rn*-GAL4/+ (*Mbs-RNAi*). For  
16 EpiGraph analysis, discs were imaged on a Zeiss LSM 880 microscope with  
17 Airyscan at 512x512 resolution with a 63x objective (NA 1.4) at 1.4x zoom for  
18 a total of 30 minutes with 1-minute time intervals and a z-step of 0.5µm. Time-  
19 lapse image sequences were segmented using Epitools (Heller et al., 2016).

20 To quantify intercalation rates, 5 WT and 5 *Mbs-RNAi* wing discs were  
21 imaged using the same methods as above, except using 5x zoom and 3  
22 minutes intervals for a total of 2 hours. Intercalation rate data was exported  
23 from the “EDGE\_T1\_TRANSITIONS” overlay in the “CellOverlay” plugin in  
24 Epitools. To exclude mistakes generated when 4-way junctions were not  
25 recognised, junctions less than 0.075µm in length were assigned a length of  
26 0µm. A productive intercalation event was scored when a neighbour  
27 exchange was stabilised for at least 2 time points (6 minutes). The total  
28 number of tracked cells was also quantified, allowing the intercalation rate to  
29 be expressed as the number of intercalations per cell per hour.

30 We also counted the number of fourfold vertices per cell in both WT and  
31 *Mbs-RNAi* conditions. In particular, we quantified the number of vertices in  
32 which four or more cells were touching each other, using Matlab R2014b. The

1 cells closest to the border of the image were excluded from the analysis. In  
2 this way, we obtained the percentage of fourfold vertices per valid cell for  
3 each image and calculated a Kolmogorov-Smirnov test to check if the  
4 distributions of both conditions were different.

## 5 **Soft and Rigid tissue simulations**

6 We have extracted a set of screenshots from two videos that simulated  
7 different dynamical behaviour of vertex model simulations. These videos are  
8 presented as Supplemental Material in (Bi et al., 2016). The first video  
9 represents a rigid behaviour in the simulation:  
10 [https://journals.aps.org/prx/supplemental/10.1103/PhysRevX.6.021011/solid](https://journals.aps.org/prx/supplemental/10.1103/PhysRevX.6.021011/solid_tissue_v0_0.2_p0_3.5_Dr_0.1.mp4)  
11 [tissue\\_v0\\_0.2\\_p0\\_3.5\\_Dr\\_0.1.mp4](https://journals.aps.org/prx/supplemental/10.1103/PhysRevX.6.021011/solid_tissue_v0_0.2_p0_3.5_Dr_0.1.mp4); the second one represents a soft  
12 behaviour: [https://journals.aps.org/prx/supplemental/10.1103/PhysRevX.6.02](https://journals.aps.org/prx/supplemental/10.1103/PhysRevX.6.021011/fluid_tissue_v0_0.2_p0_3.8_Dr_0.1.mp4)  
13 [1011/fluid\\_tissue\\_v0\\_0.2\\_p0\\_3.8\\_Dr\\_0.1.mp4](https://journals.aps.org/prx/supplemental/10.1103/PhysRevX.6.021011/fluid_tissue_v0_0.2_p0_3.8_Dr_0.1.mp4). In both videos, we selected a  
14 total of 13 frames with steps of 3.333 seconds (from  $t = 0$  to 40 seconds).

## 15 **Graphlets and motifs selection.**

16 The different images from the previous section were used to create a graph  
17 of cell-to-cell contacts ((Escudero et al., 2011) and **Supplementary Material**  
18 **and methods**) that served as the source for the graphlet analysis (Pržulj,  
19 2007; Pržulj et al., 2004). First, we adapted the graphlet analysis performed  
20 by EpiGraph to the nature of our samples (tessellations). Three graphlets  
21 were discarded since they were not possible in the context of an epithelial  
22 tissue (**Fig. 1** and **Fig. S1**). Second, we used the computer program for  
23 graphlet identification and calculation ORCA (Orbit Counting Algorithm)  
24 (Hočevár and Demšar, 2014), to extract the different conformations of nodes  
25 assembling the graphlets, called orbits (Pržulj, 2007). We computed the  
26 Graphlet degree Distribution of the 73 given orbits from the 29 graphlets, and  
27 then we removed the non-used ones. The reason to remove these graphlets  
28 was that they were either redundant or not possible in a planar tissue. On the  
29 first case, G5 and G27 were redundant since, in order to achieve G5 in a  
30 plane, there must be a centre cell with 4 sides, the same centre cell captured  
31 on G27 (**Fig 1** and **Fig. S1**). It may occur that more than one cell is inside G5,  
32 which could not be captured by G27, still it would be captured by G5 and the  
33 chances of encounter this setting would be very low. Regarding the second

1 case, G20, G22 and G25 were not possible to achieve in a planar tessellation  
2 since it is assumed the convexity of the cells. Therefore, we removed them.

### 3 **Shape index calculation**

4 We have extracted the shape index, as an indicator of rigidity, from each  
5 natural and simulated image, based on (Bi et al., 2015). The global shape  
6 index in a tissue was measured as the median of the shape index of the  
7 individual valid cells. We quantified the cell area and perimeter using Matlab  
8 R2014b. We performed the following approach: We captured the vertex  
9 coordinates for each valid cell. Then, we calculated the Euclidean distance  
10 between each adjacent vertex, and adding all of them, we got the cell  
11 perimeter. From these vertices, a polygon was inferred and we calculated its  
12 contained area using the “polyarea” Matlab function.

### 13 **Statistical analysis.**

14 We have estimated the closest CVTn diagram of a given image in terms of  
15 the three GDDs measured in EpiGraph (Epi-Hexagons, Epi-Random and Epi-  
16 Voronoi5). We computed the centre of the point cloud formed by the 20  
17 randomizations of a particular CVTn diagram as the mean of those twenty  
18 images, obtaining a 3D point. Then, we calculated the Euclidean distance  
19 between all the CVTn diagrams central points and the three calculated  
20 parameters of the input image, obtaining its closest point, which corresponds  
21 to its closest diagram. Furthermore, we checked if this image belonged to the  
22 closest diagram point cloud using an outlier detection approach. In particular,  
23 we tested if the inclusion of the image into a CVTn diagram point cloud would  
24 increase or decrease the standard deviation of the original group. We  
25 assigned the probability of being an inlier, which is defined as follows:

$$26 \quad \text{confidence score} = \frac{1}{n} \sum_{i=1}^n \frac{\text{std}(\text{closest CVTn cloud})_i}{\text{std}(\text{closest CVTn cloud} + \text{newImg})_i}$$

27 Where n is the total number of coordinates, which in our case is 3 due to  
28 the three-dimensional space; the parameter stands for every different  
29 coordinate (Epi-Hexagons, Epi-Random and Epi-Voronoi5); represents the  
30 values of the 20 images from the closest CVTn diagram in a specific  
31 coordinate and is the value of the input image for the same coordinate. The

1 values range from 0 (very far from point cloud) to  $+\infty$  (inside point cloud). We  
2 have estimated that with a confidence of  $> 0.95$  the input image is considered  
3 to be an inlier.

4

5

6

7

1   **REFERENCES**

2

3   Albert R, Barabasi A-L. 2002. Statistical mechanics of complex networks.  
4       *Rev Mod Phys* **74**:47–97.

5   Benson AR, Gleich DF, Leskovec J. 2016. Higher-order organization of  
6       complex networks. *Science (80- )* **353**:163–166. doi:10.1038/s41588-  
7       018-0165-1

8   Bertet C, Sulak L, Lecuit T. 2004. Myosin-dependent junction remodelling  
9       controls planar cell intercalation and axis elongation. *Nature* **429**:667–  
10      671.

11   Bi D, Lopez JH, Schwarz JM, Manning ML. 2015. A density-independent  
12      rigidity transition in biological tissues. *Nat Phys* **11**:1074–1079.  
13      doi:10.1038/nphys3471

14   Bi D, Yang X, Marchetti MC, Manning ML. 2016. Motility-driven glass and  
15      jamming transitions in biological tissues. *Phys Rev X* **6**.  
16      doi:10.1103/PhysRevX.6.021011

17   Blanchard GB. 2017. Taking the strain: Quantifying the contributions of all  
18      cell behaviours to changes in epithelial shape. *Philos Trans R Soc B*  
19      *Biol Sci*. doi:10.1098/rstb.2015.0513

20   Blanchard GB, Kabla AJ, Schultz NL, Butler LC, Sanson B, Gorfinkiel N,  
21      Mahadevan L, Adams RJ. 2009. Tissue tectonics: morphogenetic strain  
22      rates, cell shape change and intercalation. *Nat Methods* **6**:458–464.  
23      doi:nmeth.1327 [pii]10.1038/nmeth.1327

24   Blankenship JT, Backovic ST, Sanny JS, Weitz O, Zallen JA. 2006.  
25      Multicellular rosette formation links planar cell polarity to tissue  
26      morphogenesis. *Dev Cell* **11**:459–470.

27   Costa LDAF, Rodrigues FA, Travieso G, Boas PR V. 2007. Characterization  
28      of complex networks: a survey of measurements. *Adv Phys* **56**:167–  
29      242.

30   Csikász-Nagy A, Escudero LM, Guillaud M, Sedwards S, Baum B, Cavaliere  
31      M. 2013. Cooperation and competition in the dynamics of tissue  
32      architecture during homeostasis and tumorigenesis. *Semin Cancer Biol*  
33      **23**. doi:10.1016/j.semcancer.2013.05.009

34   Curran S, Strandkvist C, Bathmann J, de Gennes M, Kabla A, Salbreux G,  
35      Baum B. 2017. Myosin II Controls Junction Fluctuations to Guide  
36      Epithelial Tissue Ordering. *Dev Cell* **43**:480-492.e6.  
37      doi:10.1016/j.devcel.2017.09.018

38   Dai JD, Gilbert LI. 1991. Metamorphosis of the corpus allatum and  
39      degeneration of the prothoracic glands during the larval-pupal-adult  
40      transformation of *Drosophila melanogaster*: a cytophysiological analysis  
41      of the ring gland. *Dev Biol* **144**:309–326.

42   Emmanuele V, Kubota A, Garcia-Diaz B, Garone C, Akman HO, Sánchez-  
43      Gutiérrez D, Escudero LM, Kariya S, Homma S, Tanji K, Quinzii CM,  
44      Hirano M. 2015. Fhl1 W122S causes loss of protein function and late-  
45      onset mild myopathy. *Hum Mol Genet* **24**. doi:10.1093/hmg/ddu490

46   Escudero LM, Bischoff M, Freeman M. 2007. Myosin II regulates complex  
47      cellular arrangement and epithelial architecture in *Drosophila*. *Dev Cell*

- 1           **13:717–729.**
- 2   Escudero LM, Costa Lda F, Kicheva A, Briscoe J, Freeman M, Babu MM.  
3   2011. Epithelial organisation revealed by a network of cellular contacts.  
4   *Nat Commun* **2**:526. doi:10.1038/ncomms1536ncomms1536 [pii]
- 5   Etournay R, Merkel M, Popović M, Brandl H, Dye NA, Aigouy B, Salbreux G,  
6   Eaton S, Jülicher F. 2016. TissueMiner: A multiscale analysis toolkit to  
7   quantify how cellular processes create tissue dynamics. *Elife* **5**:773–  
8   786. doi:10.7554/eLife.14334
- 9   Farhadifar R, Roper JC, Aigouy B, Eaton S, Julicher F. 2007. The influence  
10   of cell mechanics, cell-cell interactions, and proliferation on epithelial  
11   packing. *Curr Biol* **17**:2095–2104.
- 12   Farrell DL, Weitz O, Magnasco MO, Zallen JA. 2017. SEGGA: a toolset for  
13   rapid automated analysis of epithelial cell polarity and dynamics.  
14   *Development* **144**:1725–1734. doi:10.1242/dev.146837
- 15   Firmino J, Rocancourt D, Saadaoui M, Moreau C, Gros J. 2016. Cell  
16   Division Drives Epithelial Cell Rearrangements during Gastrulation in  
17   Chick. *Dev Cell* **36**:249–261. doi:10.1016/j.devcel.2016.01.007
- 18   Fletcher AG, Osterfield M, Baker RE, Shvartsman SY. 2014. Vertex models  
19   of epithelial morphogenesis. *Biophys J* **106**:2291–2304.  
20   doi:10.1016/j.bpj.2013.11.4498
- 21   Gibson MC, Patel AB, Nagpal R, Perrimon N. 2006. The emergence of  
22   geometric order in proliferating metazoan epithelia. *Nature* **442**:1038–  
23   1041.
- 24   Girdler GC, Roper K. 2014. Controlling cell shape changes during salivary  
25   gland tube formation in *Drosophila*. *Semin Cell Dev Biol* **31**:74–81.  
26   doi:10.1016/j.semcdb.2014.03.020
- 27   Gómez-Gálvez P, Vicente-Munuera P, Tagua A, Forja C, Castro AM, Letrán  
28   M, Valencia-Expósito A, Grima C, Bermúdez-Gallardo M, Serrano-  
29   Pérez-Higueras Ó, Cavodeassi F, Sotillos S, Martín-Bermudo MD,  
30   Márquez A, Buceta J, Escudero LM. 2018. Scutoids are a geometrical  
31   solution to three-dimensional packing of epithelia. *Nat Commun* **9**.  
32   doi:10.1038/s41467-018-05376-1
- 33   Guillaud M, Clem C, Macaulay C. 2010. An in silico platform for the study of  
34   epithelial pre-invasive neoplastic development. *Biosystems* **102**:22–31.  
35   doi:10.1016/j.biosystems.2010.07.008S0303-2647(10)00116-4 [pii]
- 36   Guirao B, Rigaud SU, Bosveld F, Bailles A, López-Gay J, Ishihara S,  
37   Sugimura K, Graner F, Bellaïche Y. 2015. Unified quantitative  
38   characterization of epithelial tissue development. *Elife* **4**:773–786.  
39   doi:10.7554/eLife.08519
- 40   Hayes W, Sun K, Pržulj N. 2013. Graphlet-based measures are suitable for  
41   biological network comparison. *Bioinformatics* **29**:483–491.  
42   doi:10.1093/bioinformatics/bts729
- 43   Heller D, Hoppe A, Restrepo S, Gatti L, Tournier AL, Tapon N, Basler K,  
44   Mao Y. 2016. EpiTools: An Open-Source Image Analysis Toolkit for  
45   Quantifying Epithelial Growth Dynamics. *Dev Cell* **36**:103–116.  
46   doi:S1534-5807(15)00797-2 [pii]10.1016/j.devcel.2015.12.012
- 47   Ho H, Milenković T, Memisević V, Aruri J, Przulj N, Ganesan AK. 2010.



- 1 Protein interaction network topology uncovers melanogenesis  
2 regulatory network components within functional genomics datasets.  
3 *BMC Syst Biol* **4**:84. doi:10.1186/1752-0509-4-84
- 4 Hočevar T, Demšar J. 2014. A combinatorial approach to graphlet counting.  
5 *Bioinformatics* **30**:559–565. doi:10.1093/bioinformatics/btt717
- 6 Jackson MD, Xu H, Duran-Nebreda S, Stamm P, Bassel GW. 2017.  
7 Topological analysis of multicellular complexity in the plant hypocotyl.  
8 *Elife* **6**. doi:10.7554/eLife.26023
- 9 Khan Z, Wang Y-C, Wieschaus EF, Kaschube M. 2014. Quantitative 4D  
10 analyses of epithelial folding during *Drosophila* gastrulation.  
11 *Development* **141**:2895–2900. doi:10.1242/dev.107730
- 12 Kuchaiev O, Stevanović A, Hayes W, Pržulj N. 2011. GraphCrunch 2:  
13 Software tool for network modeling, alignment and clustering. *BMC*  
14 *Bioinformatics* **12**. doi:10.1186/1471-2105-12-24
- 15 Kursawe J, Bardenet R, Zartman JJ, Baker RE, Fletcher AG. 2016. Robust  
16 cell tracking in epithelial tissues through identification of maximum  
17 common subgraphs. *J R Soc Interface* **13**. doi:10.1098/rsif.2016.0725
- 18 Lecuit T, Lenne PF. 2007. Cell surface mechanics and the control of cell  
19 shape, tissue patterns and morphogenesis. *Nat Rev Mol Cell Biol*  
20 **8**:633–644.
- 21 Lloyd S. 1957. Least square quantization in PCM's. *Bell Teleph Lab* **28**:129–  
22 137.
- 23 Mirams GR, Arthurs CJ, Bernabeu MO, Bordas R, Cooper J, Corrias A,  
24 Davit Y, Dunn SJ, Fletcher AG, Harvey DG, Marsh ME, Osborne JM,  
25 Pathmanathan P, Pitt-Francis J, Southern J, Zemzemi N, Gavaghan  
26 DJ. 2013. Chaste: an open source C++ library for computational  
27 physiology and biology. *PLoS Comput Biol* **9**:e1002970.  
28 doi:10.1371/journal.pcbi.1002970PCOMPBIOL-D-12-01337 [pii]
- 29 Mongera A, Rowghanian P, Gustafson HJ, Shelton E, Kealhofer DA, Carn  
30 EK, Serwane F, Lucio AA, Giammona J, Campàs O. 2018. A fluid-to-  
31 solid jamming transition underlies vertebrate body axis elongation.  
32 *Nature* **561**:401–405. doi:10.1038/s41586-018-0479-2
- 33 Park JA, Kim JH, Bi D, Mitchel JA, Qazvini NT, Tantisira K, Park CY, McGill  
34 M, Kim SH, Gweon B, Notbohm J, Steward R, Burger S, Randell SH,  
35 Kho AT, Tambe DT, Hardin C, Shore SA, Israel E, Weitz DA,  
36 Tschumperlin DJ, Henske EP, Weiss ST, Manning ML, Butler JP,  
37 Drazen JM, Fredberg JJ. 2015. Unjamming and cell shape in the  
38 asthmatic airway epithelium. *Nat Mater* **14**:1040–1048.  
39 doi:10.1038/nmat4357
- 40 Petridou NI, Grigolon S, Salbreux G, Hannezo E, Heisenberg C-P. 2018.  
41 Fluidization-mediated tissue spreading by mitotic cell rounding and non-  
42 canonical Wnt signalling. *Nat Cell Biol* **1**. doi:10.1038/s41556-018-  
43 0247-4
- 44 Pilot F, Lecuit T. 2005. Compartmentalized morphogenesis in epithelia: from  
45 cell to tissue shape. *Dev Dyn* **232**:685–694.
- 46 Pržulj N. 2007. Biological network comparison using graphlet degree  
47 distribution. *Bioinformatics* **23**:853–854.

- 1       doi:10.1093/bioinformatics/btl301
- 2       Pržulj N, Corneil DG, Jurisica I. 2004. Modeling interactome: Scale-free or  
3       geometric? *Bioinformatics* **20**:3508–3515.  
4       doi:10.1093/bioinformatics/bth436
- 5       Sáez A, Rivas E, Montero-Sánchez A, Paradas C, Acha B, Pascual A,  
6       Serrano C, Escudero LM. 2013. Quantifiable diagnosis of muscular  
7       dystrophies and neurogenic atrophies through network analysis. *BMC*  
8       *Med* **11**:77. doi:10.1186/1741-7015-11-77
- 9       Sánchez-Gutiérrez D, Sáez A, Gómez-Gálvez P, Paradas C, Escudero LM.  
10       2017. Rules of tissue packing involving different cell types: Human  
11       muscle organization. *Sci Rep* **7**:40444. doi:10.1038/srep40444
- 12       Sanchez-Gutierrez D, Saez A, Pascual A, Escudero LM. 2013. Topological  
13       progression in proliferating epithelia is driven by a unique variation in  
14       polygon distribution. *PLoS One* **8**:e79227.  
15       doi:10.1371/journal.pone.0079227PONE-D-13-27658 [pii]
- 16       Sanchez-Gutierrez D, Tozluoglu M, Barry JD, Pascual A, Mao Y, Escudero  
17       LM. 2016. Fundamental physical cellular constraints drive self-  
18       organization of tissues. *EMBO J* **35**:77–88.  
19       doi:10.15252/embj.201592374
- 20       Schindelin J, Arganda-Carreras I, Frise E, Kaynig V, Longair M, Pietzsch T,  
21       Preibisch S, Rueden C, Saalfeld S, Schmid B, Tinevez J-Y, White DJ,  
22       Hartenstein V, Eliceiri K, Tomancak P, Cardona A. 2012. Fiji: an open-  
23       source platform for biological-image analysis. *Nat Methods* **9**:676–682.  
24       doi:10.1038/nmeth.2019
- 25       Soto AM, Sonnenschein C. 2011. The tissue organization field theory of  
26       cancer: A testable replacement for the somatic mutation theory.  
27       *BioEssays* **33**:332–340. doi:10.1002/bies.201100025
- 28       Tanaka S, Sichau D, Iber D. 2015. LBIBCell: a cell-based simulation  
29       environment for morphogenetic problems. *Bioinformatics* **31**:2340–7.  
30       doi:10.1093/bioinformatics/btv147
- 31       Tetley RJ, Mao Y. 2018. The same but different: Cell intercalation as a  
32       driver of tissue deformation and fluidity. *Philos Trans R Soc B Biol Sci*.  
33       doi:10.1098/rstb.2017.0328
- 34       Tsuboi A, Ohsawa S, Umetsu D, Sando Y, Kuranaga E, Igaki T, Fujimoto K.  
35       2018. Competition for Space Is Controlled by Apoptosis-Induced  
36       Change of Local Epithelial Topology. *Curr Biol* **28**:2115–2128.  
37       doi:10.1016/J.CUB.2018.05.029
- 38       Weigert M, Schmidt U, Boothe T, Müller A, Dibrov A, Jain A, Wilhelm B,  
39       Schmidt D, Broaddus C, Culley S, Rocha-Martins M, Segovia-Miranda  
40       F, Norden C, Henriques R, Zerial M, Solimena M, Rink J, Tomancak P,  
41       Royer L, Jug F, Myers EW. 2018. Content-aware image restoration:  
42       pushing the limits of fluorescence microscopy. *Nat Methods* **15**:1090–  
43       1097. doi:10.1038/s41592-018-0216-7
- 44       Yamashita S, Michiue T. 2014. Quantitative analysis of cell arrangement  
45       indicates early differentiation of the neural region during *Xenopus*  
46       gastrulation. *J Theor Biol* **346**:1–7. doi:10.1016/j.jtbi.2013.12.029
- 47       Zartman J, Restrepo S, Basler K. 2013. A high-throughput template for

1        optimizing *Drosophila* organ culture with response-surface methods.  
2        *Development* **140**:2848–2848. doi:10.1242/dev.098921  
3  
4  
5

1 **Figure 1. Graphlets, cellular motifs and characterization of epithelial**  
2 **organization. A)** A representation of the cellular motifs that correspond to  
3 graphlets of up to five nodes. There are 29 motifs corresponding to 26  
4 different graphlets (**Fig. S1**). Note that one graphlet can represent two cellular  
5 motifs (G8, G23 and G26). Mauve motifs form the 17-motifs set. Prussian  
6 Blue motifs stands for the set 29-motifs. In the first row are the motifs that  
7 account for the organization of groups of up to 4 cells (10-motifs). Therefore,  
8 7-motifs set is formed by the mauve coloured graphlets at the first row. **B)**  
9 Polygon distribution comparison of images from: Voronoi diagram 1 (black  
10 bar); Eye (orange), *Drosophila* eye disc: 3 samples; Voronoi diagram 4 (grey);  
11 dWL (green), *Drosophila* larva wing disc: 15 samples; Voronoi diagram 5 (light  
12 grey), dWP (red), *Drosophila* prepupal wing imaginal disc epithelium: 16  
13 samples. Data shown refer to the mean  $\pm$  SEM. Diagram 1, 4 and 5: 20  
14 replicates. **C)** GDD value calculation (17-motifs) between natural images and  
15 Voronoi diagrams with similar polygon distribution. The data shown are the  
16 mean of the GDD between each pair of images.

1 **Figure 2. Epithelial organization of biological tissues with respect to the**  
2 **CVTn. A-C)** Tessellations with the corresponding graph of cell-to-cell  
3 contacts for a perfect hexagonal arrangement **(A)** a Voronoi Diagram 1 **(B)**  
4 and a Voronoi Diagram 5 **(C)** from a CVTn. These tessellations represent the  
5 diagrams used as reference to calculate the Epi-Hexagons, Epi-Random and  
6 Epi-Voronoi5 respectively. The light blue edges in these panels represent the  
7 cellular connectivity network. The colourful nodes mark the valid cells that  
8 were involved in the cellular motifs to measure graphlets presence. The dark  
9 blue and green nodes are the 3-distance valid cells (cells connected  
10 exclusively to valid cells within a distance of 3 edges), which were used to  
11 calculate the graphlets for 10-motifs and 7-motifs. The green nodes are the  
12 4-distance valid cells (cells connected exclusively to valid cells within a  
13 distance of 4 edges) that were used to quantify the graphlets for 29-motifs  
14 and 17-motifs. Cells without nodes were no valid cells for graphlet calculation.  
15 **D)** Representative images from the natural tessellations. **E)** Plots showing the  
16 different combinations of the values for 17-motifs of Epi-Hexagons, Epi-  
17 Random and Epi-Voronoi5 with the percentage of hexagons. The diagrams  
18 of the CVTn path from the iteration 1 until the iteration 700 are represented  
19 as a greyscale beginning in black and reducing its darkness with the increase  
20 of the iterations (from 1 to 20, from 30 to 100 by stepwise of 10 and from 100  
21 to 700 by stepwise of 100). **F-G)** Charts representing the comparisons Epi-  
22 Hexagons against Epi-Random, and Epi-Random against Epi-Voronoi5,  
23 respectively. The CVTn path in both scatter plots, is formed by the diagrams  
24 with numbers between 1 and 100, in a greyscale as in **(E)**. The natural  
25 tessellations are: dMWP (violet), *Drosophila* mutant wing disc: 3 samples;  
26 cNT (light blue), chicken neural tube: 16 samples; Eye, dWL and dWP are the  
27 same replicates than **Fig.1** and preserve their colour codes. Circumferences  
28 are individual values, circles are the average value obtained from the  
29 individual samples from each category.

1 **Figure 3. Comparison of different simulations and mutants with the**  
2 **CVTn. A-C)** Representative images for non-proliferative simulations. Control  
3 with homogeneous parameters (**A**). The ‘squared’ simulations are similar to  
4 control, but a ten percent of cells (randomly chosen) have a reduced line  
5 tension (**B**). The ‘elongated’ simulations have a ten percent of cells (randomly  
6 chosen) with its line tension and ideal area reduced, and the another 90% of  
7 cells have the same parameters than control simulations (**C**). **D)** Cell  
8 arrangement resulting from the control simulation that includes cell  
9 proliferation. **E-F)** Diagrams resulting from a vertex model simulation with an  
10 increase of the ideal area value, with respect the control, in some cells. Case  
11 III and Case IV slightly differ in the line-tension parameter conditions (see  
12 **Material and methods**). **G)** Plots showing the values of Epi-Random vs Epi-  
13 Voronoi5 and the percentage of hexagons vs Epi-Voronoi5 (17-motifs) for  
14 CVTn, dMWP, Eye, cNT, dWL, dWP; Proliferative Control (20 replicates,  
15 carnation pink), Case III (17 replicates, hot pink) and Case IV (15 replicates,  
16 purple); Non-proliferative control (20 replicates, blue bell), Squared (20  
17 replicates, azure blue) and Elongated simulations (20 replicates, cornflower  
18 Blue). The diagrams of the CVTn path from the iteration 1 until the iteration  
19 100 are represented as a greyscale beginning in black and reducing its  
20 darkness with the increase of the iterations; dMWP, Eye, cNT, dWL and dWP  
21 have the same replicates and colour codes than Fig.2; circumferences are  
22 individual values, circles are the average value obtained from the individual  
23 samples from each category.

24

25

1 **Figure 4. The rigidity/fluidity of a tissue can be assessed using**  
2 **EpiGraph. A)** Initial and final frames of two simulations with different settings:  
3 a rigid and a soft tissue. **B)** EpiGraph's 3D plot with Epi-Random, Epi-  
4 Hexagons and Epi-Voronoi5 axes, showing the soft simulation tissue in green  
5 dots and the rigid simulation as orange dots. Each simulation is represented  
6 in 13 frames (see **Material and methods**). **C-D)** Representative examples of  
7 segmented images from the third instar *Drosophila* imaginal disc in different  
8 conditions: Wild Type (**C**); a solid mutant, *Mbs-RNAi* in (**D**). **E)** Plot comparing  
9 the fluidity and organization of the tissues in (**C-D**). CVTn (until diagram 30)  
10 displayed in greyscale. Dots in scales of blue represent the WT condition:  
11 wing disc 1, aquamarine; wing disc 2, light blue; wing disc 3, dark blue.  
12 Represented with points in tones of orange-red, *Mbs-RNAi*: sample 1, salmon  
13 colour; sample 2, orange; sample 3, red. **F-G)** Boxplot of the intercalation rate  
14 (**F**), which is the number of T1 transitions per cell per hour, and the fourfold  
15 vertices found per cell (**G**) (note that no fivefold vertices, or beyond, was found  
16 on any sample). Boxes stand for the data inside the upper and lower  
17 quartiles, while the vertical dashed lines (whiskers) indicate the variability  
18 outside them. Mean (dashed line) and median (thick line) of each condition is  
19 represented inside each box. The actual values are also presented as circles  
20 (and the outlier values as circumferences) with its correspondent colour. In  
21 addition, statistical significance, by means of a Kolmogorov-Smirnov test, is  
22 shown in the top of both panels (**F**: '\*\*\*'  $p < 0.01$ , **G**: '\*\*'  $p < 0.05$ ). Each condition  
23 has 3 samples (different colour tone), and the numeric tag represents its  
24 frame. In WT have been taken 6 frames per sample in periods of 6 minutes.  
25 In the case of *Mbs-RNAi* were taken 3 frames per sample with time lapse of  
26 15 minutes. All the conditions have been tracked for 30 minutes (see **Material**  
27 **and methods**).

28

29

**A**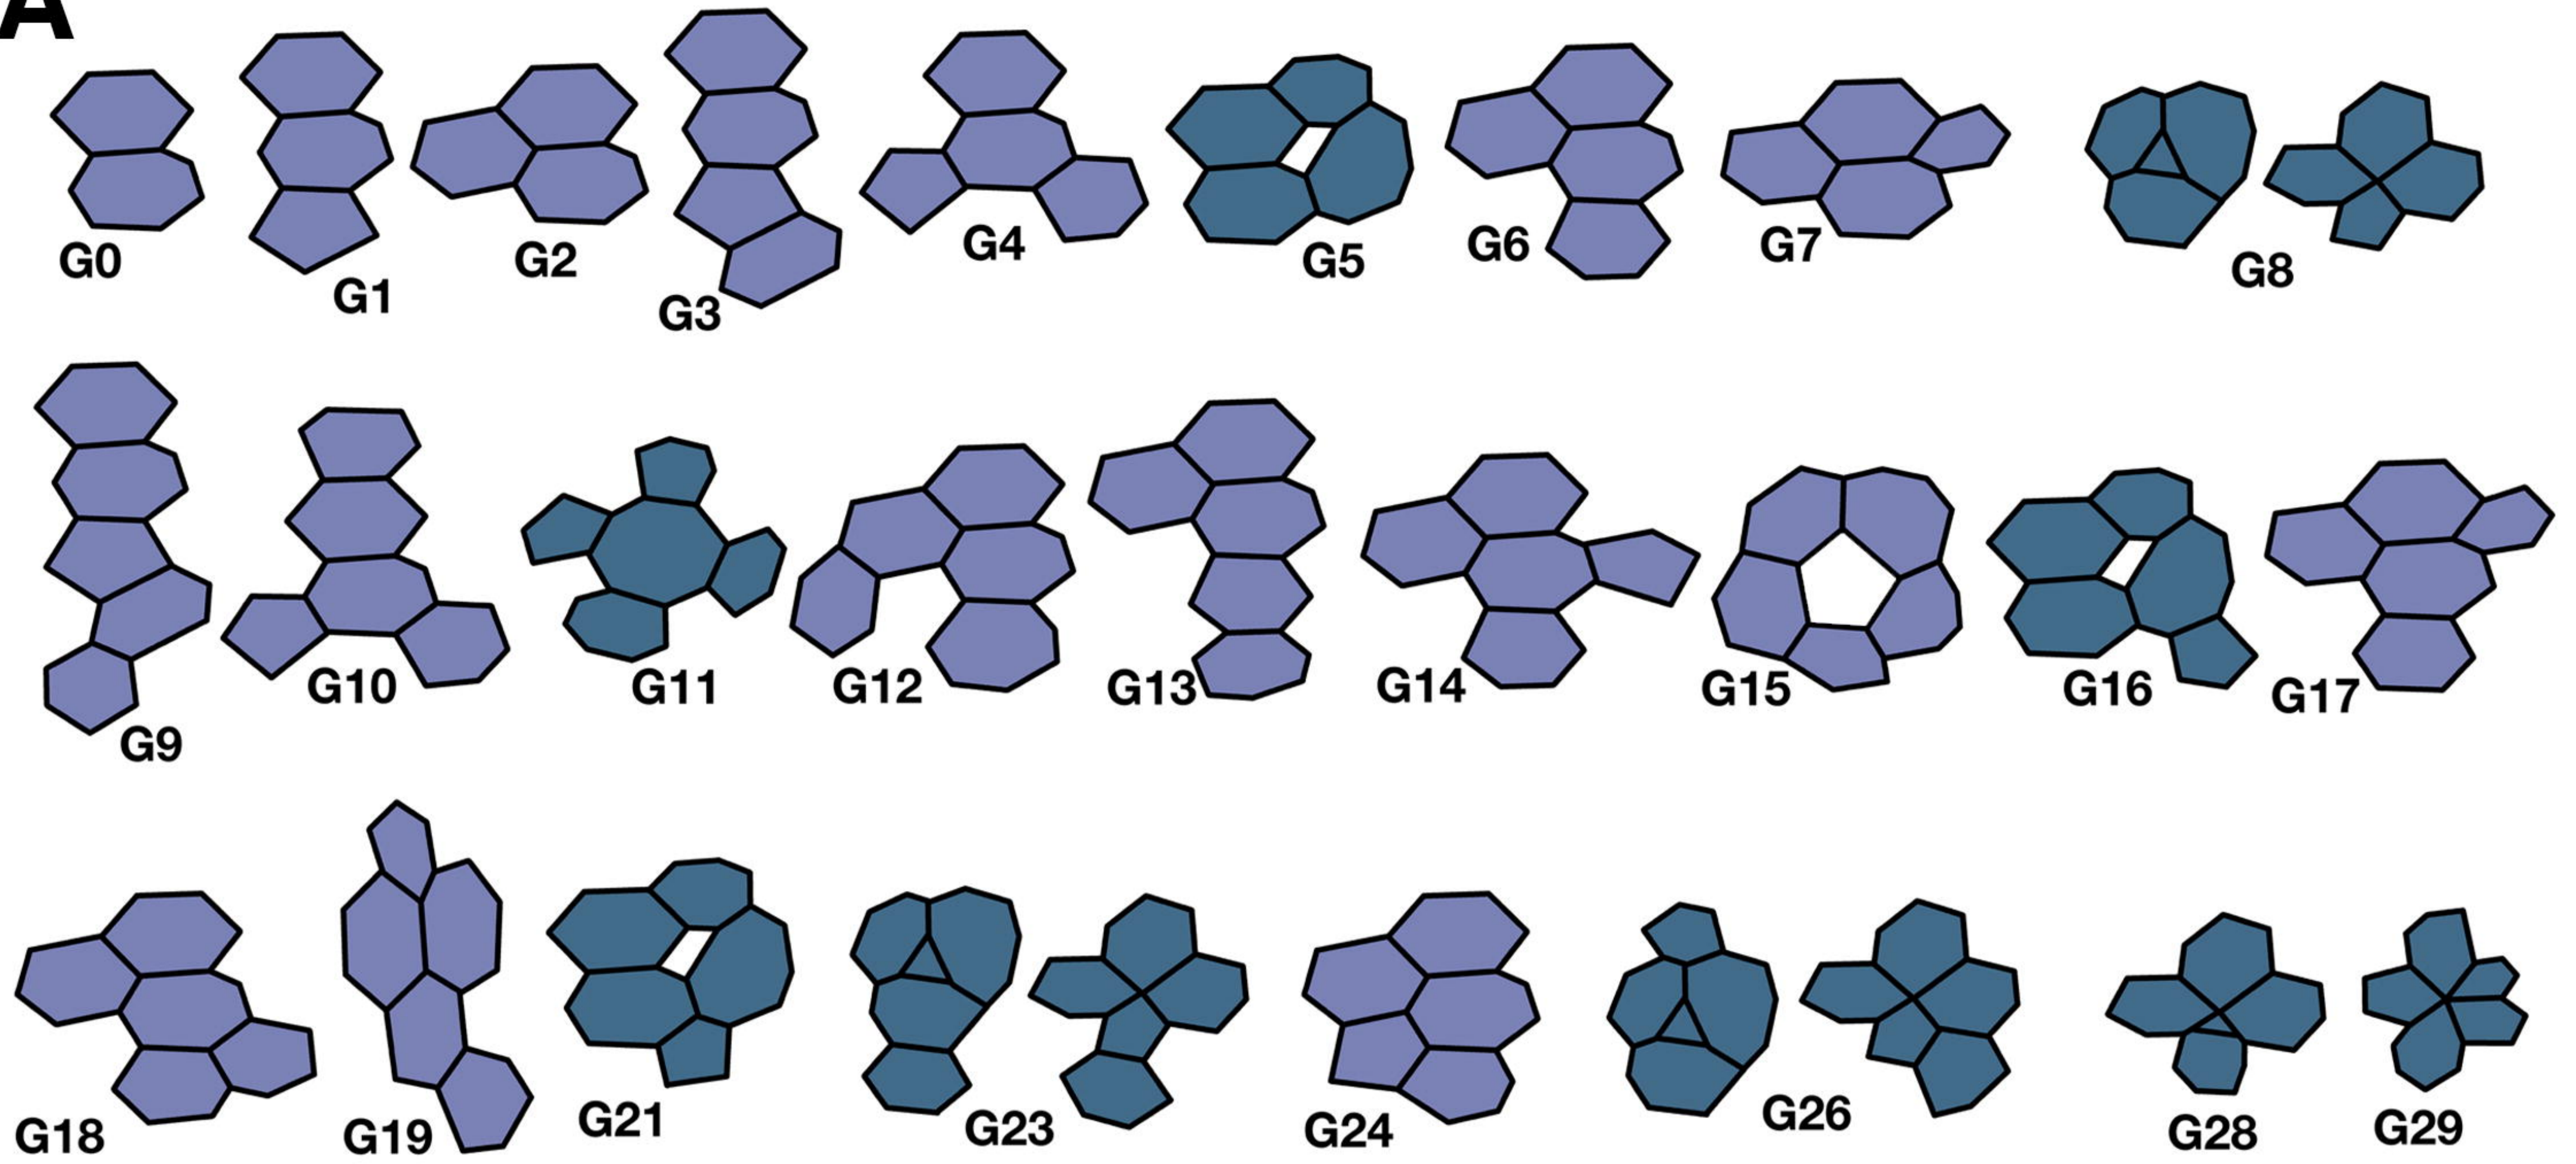**B**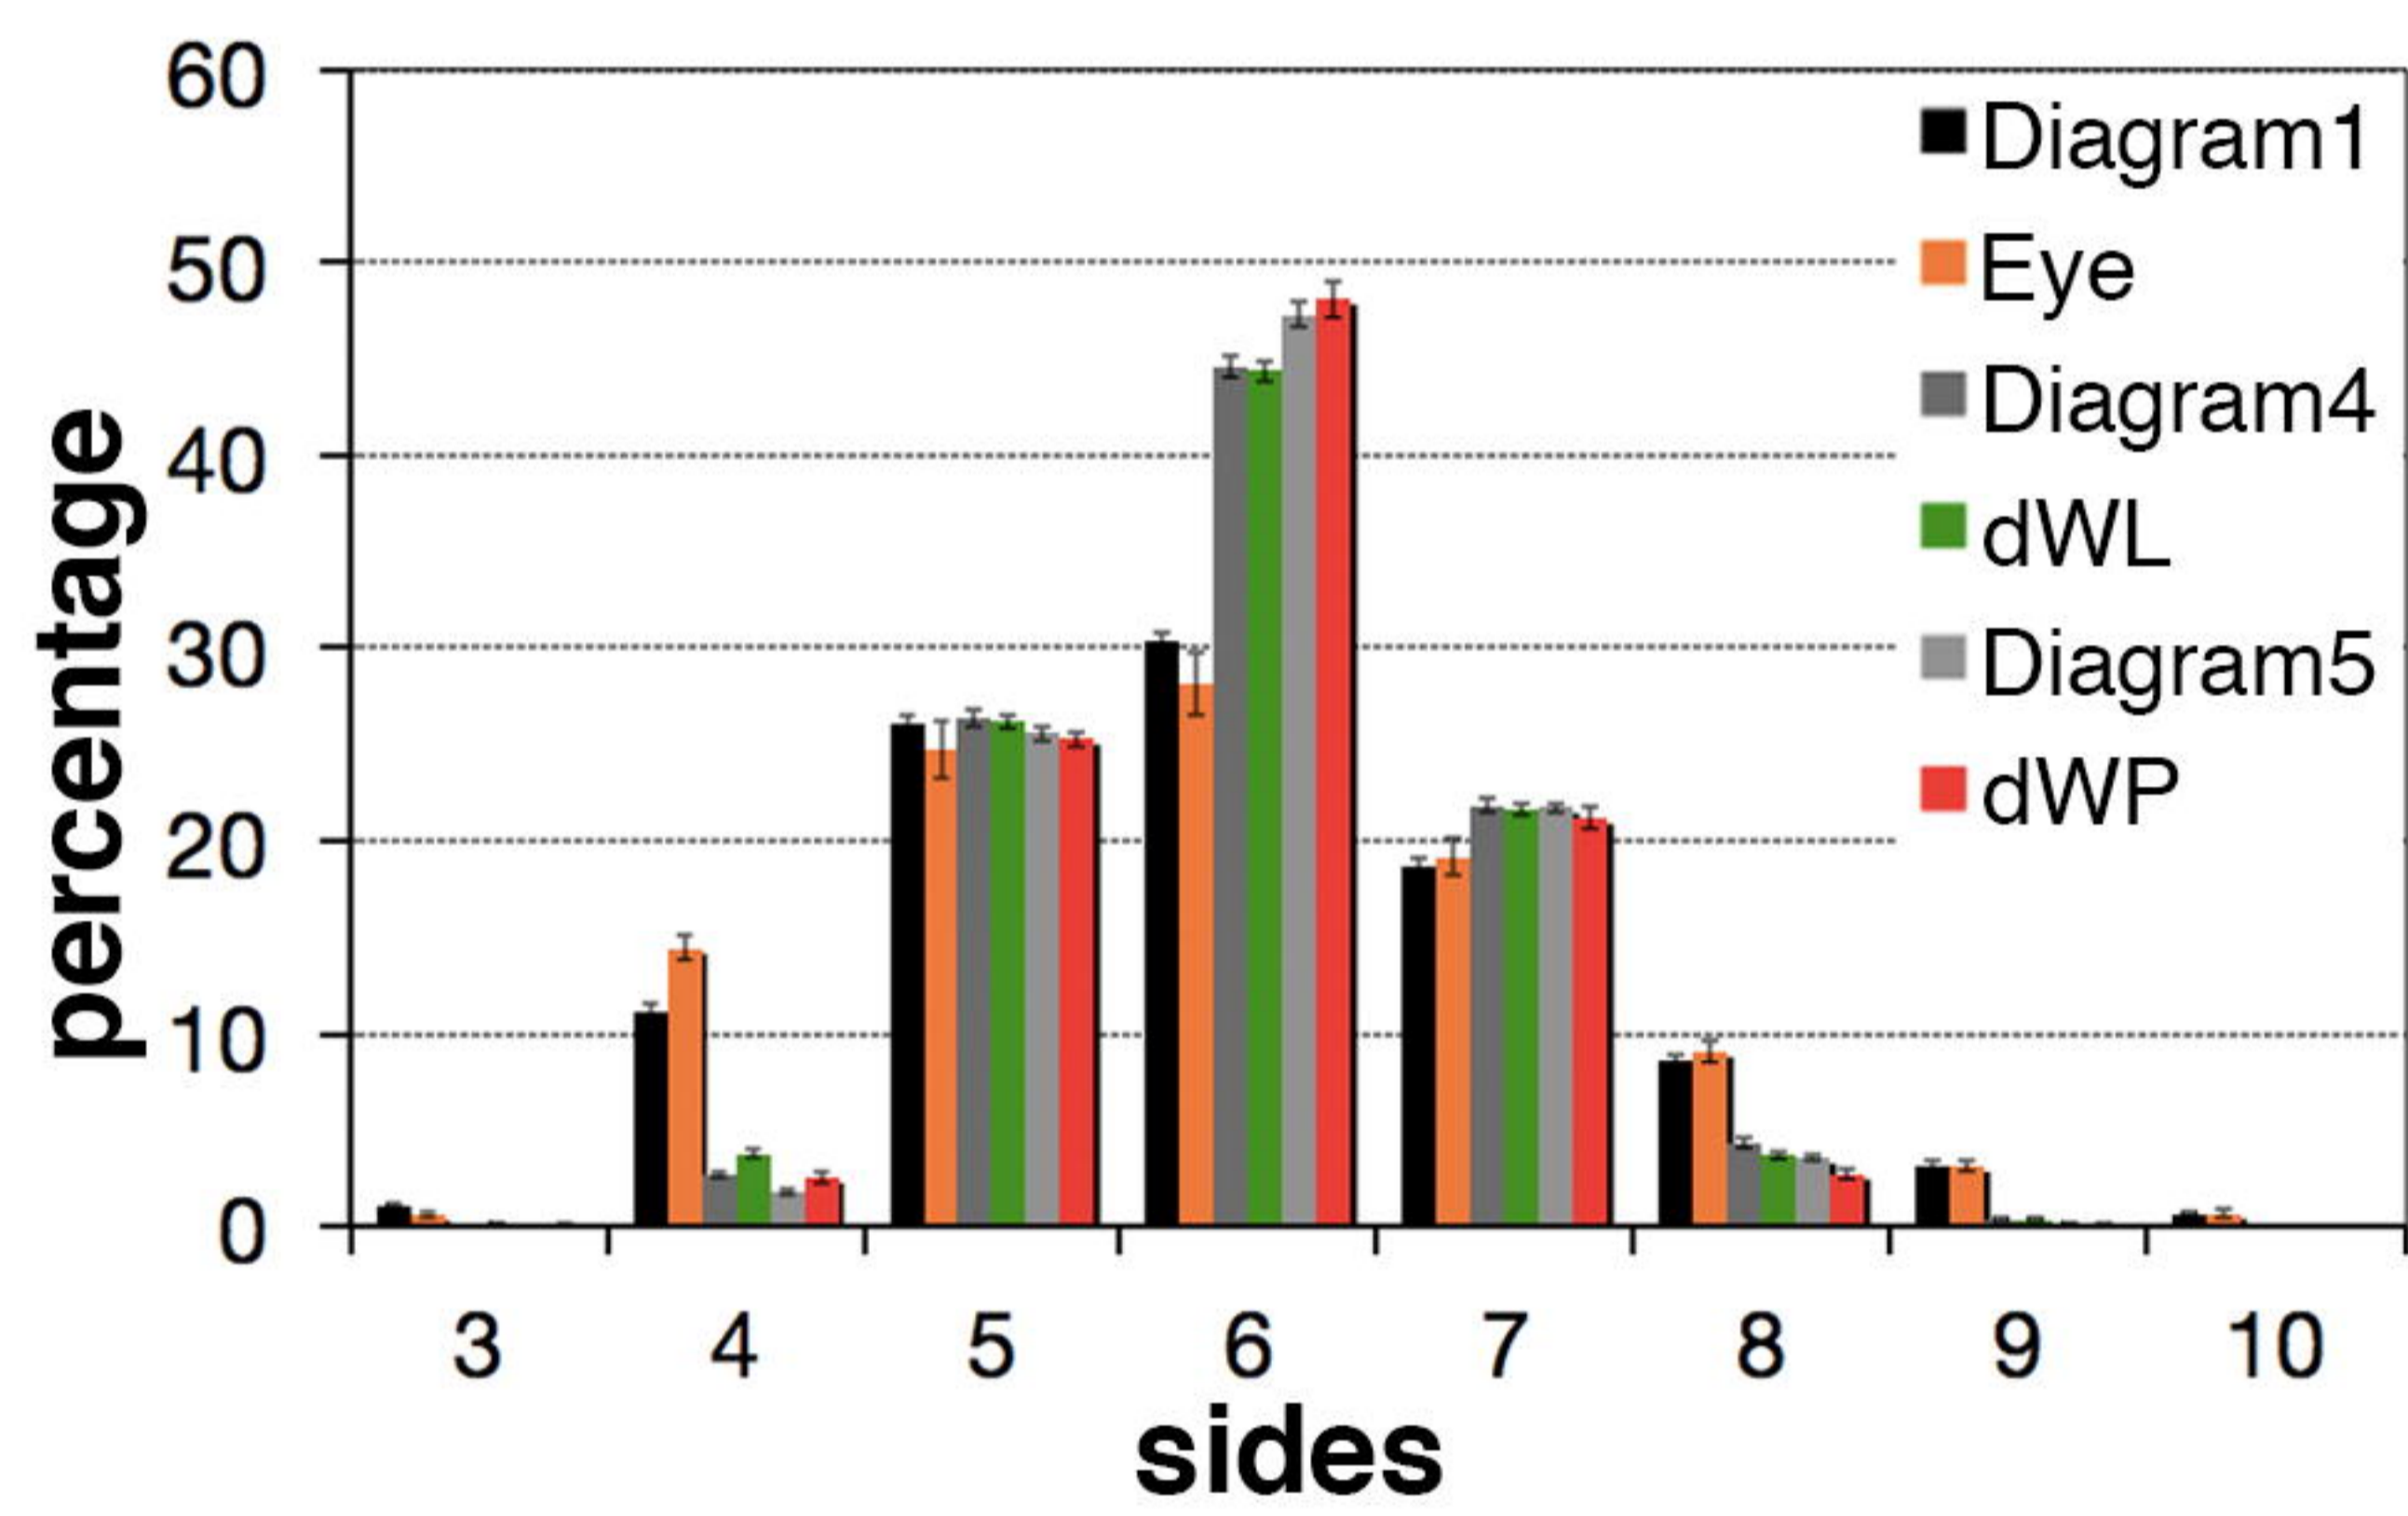**C**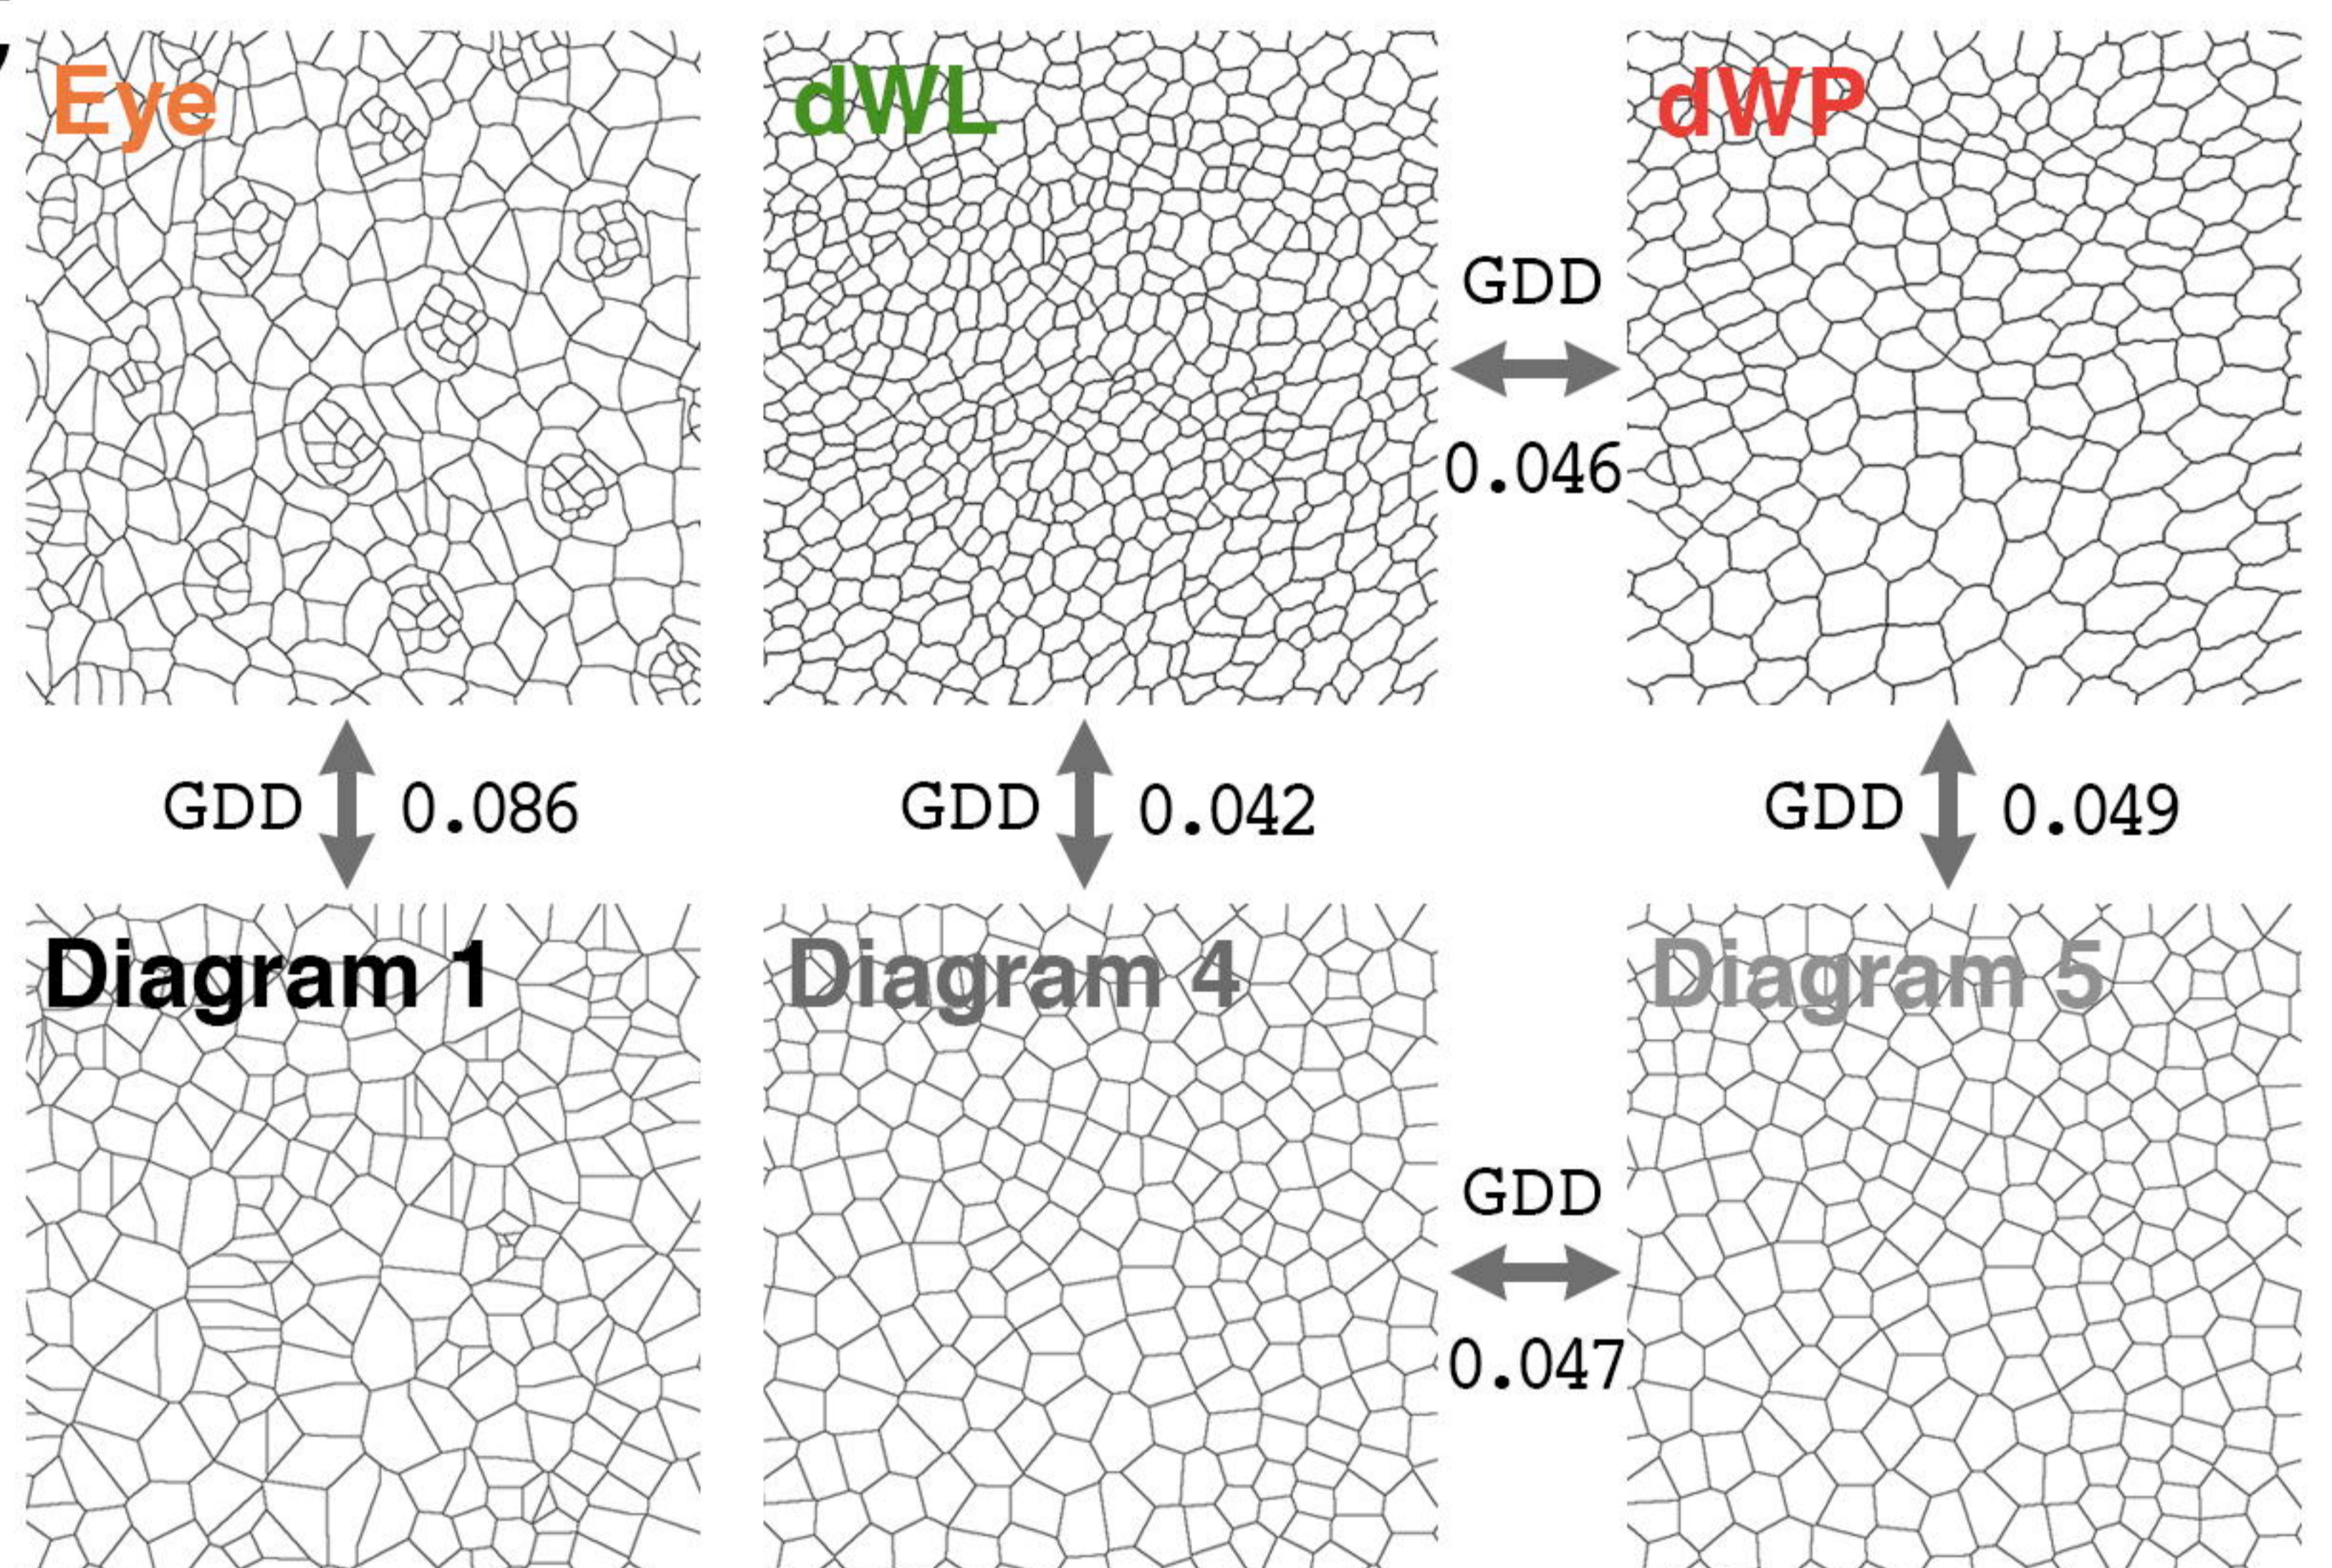



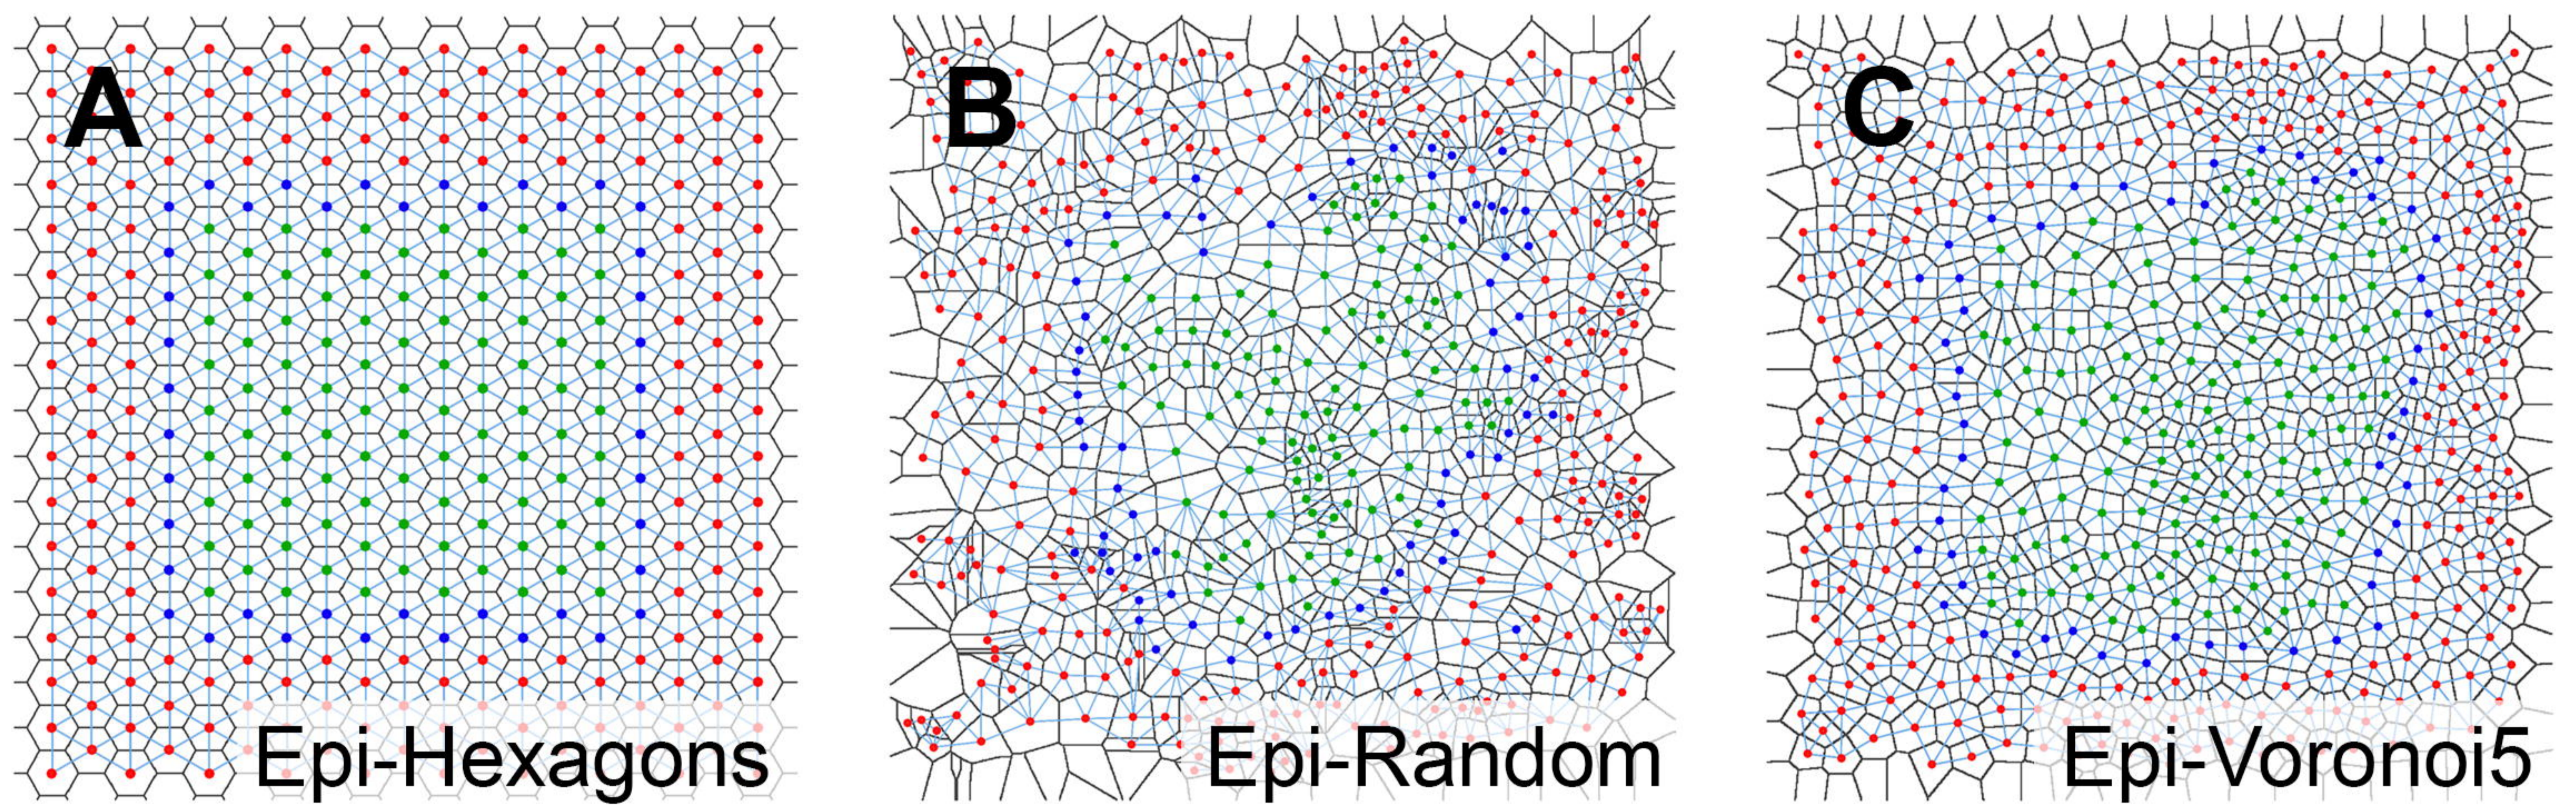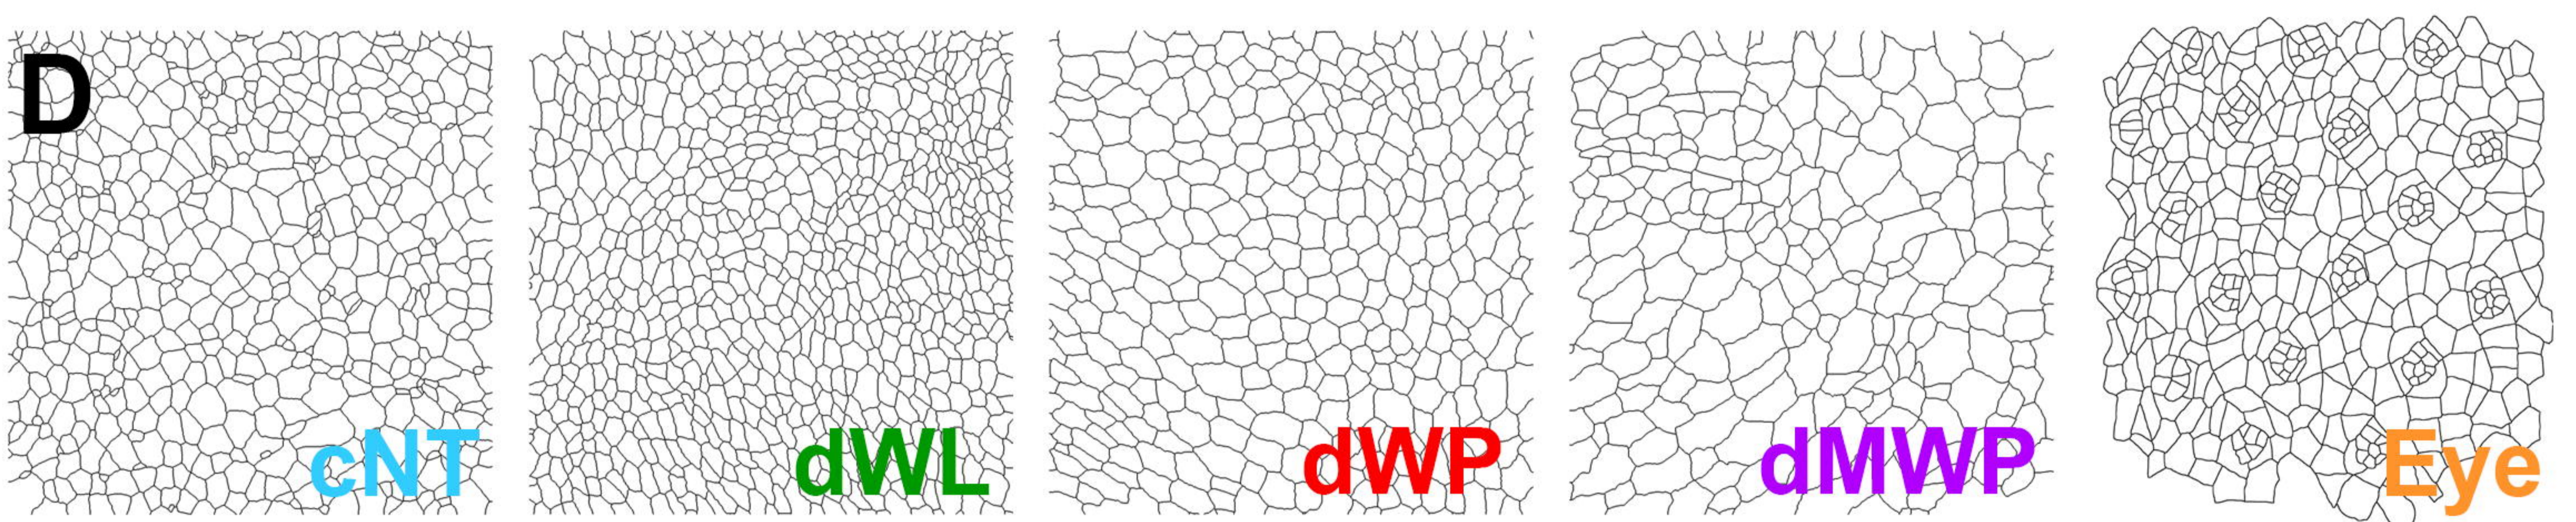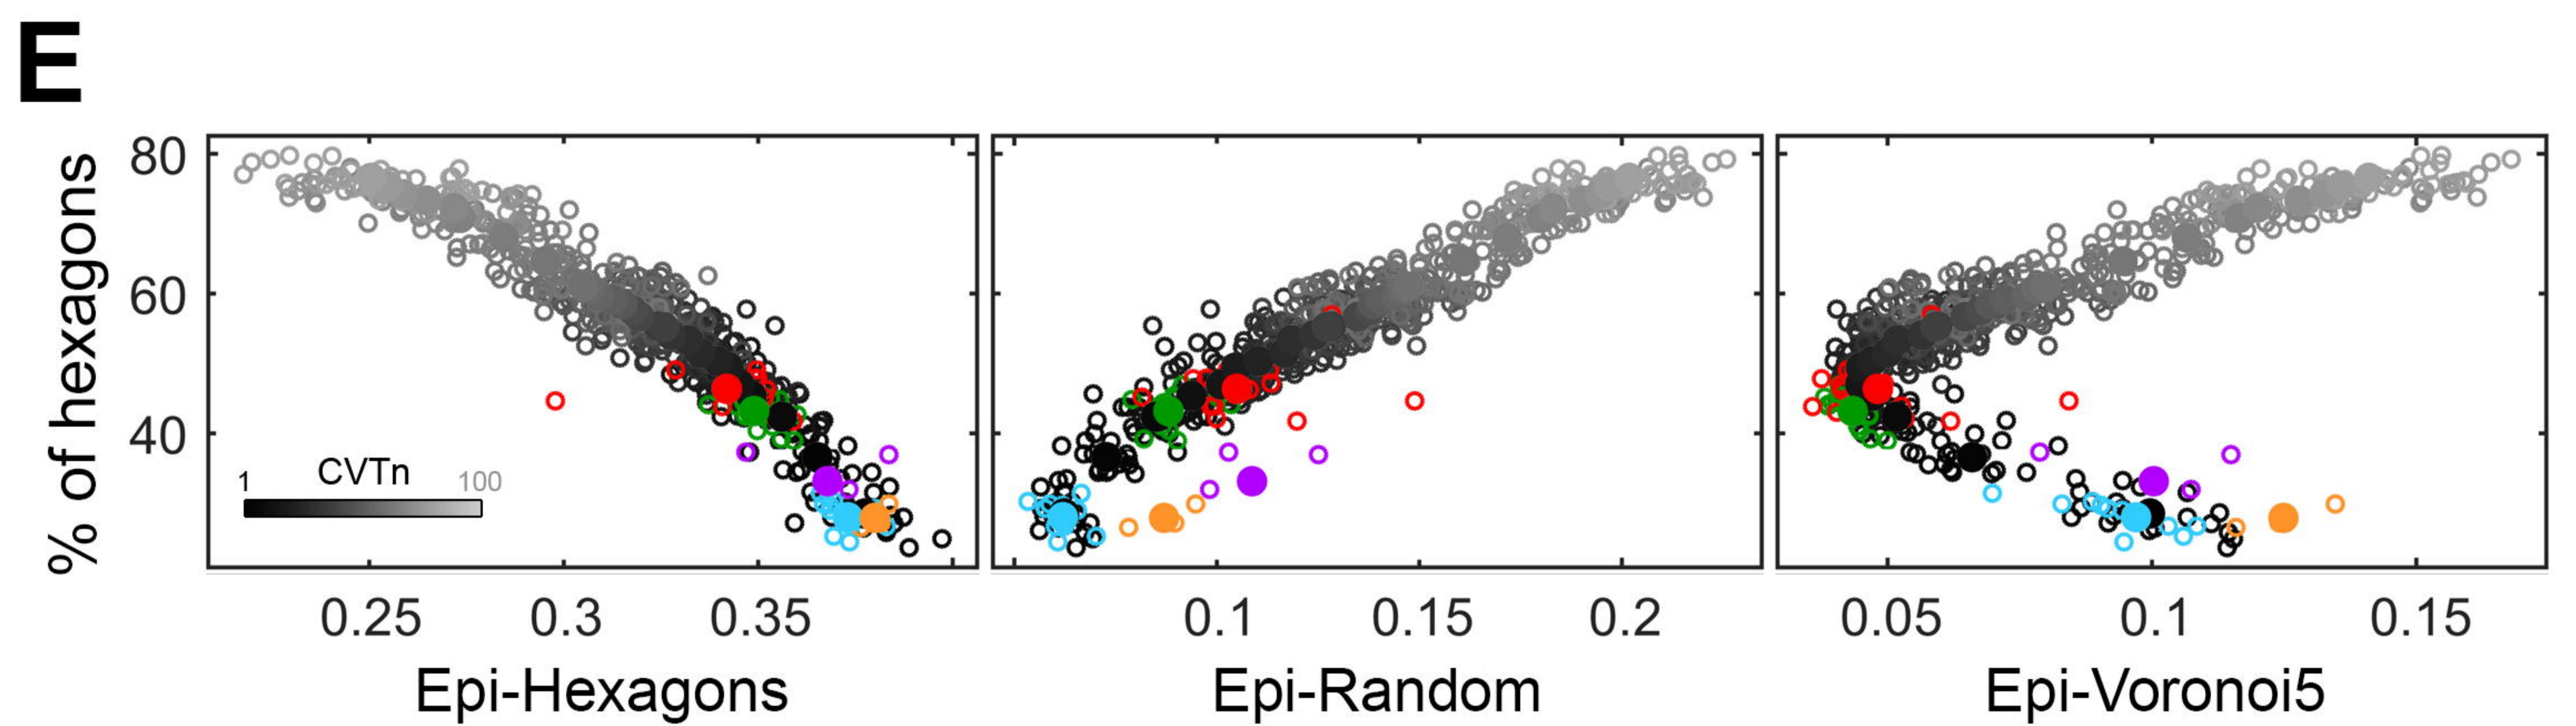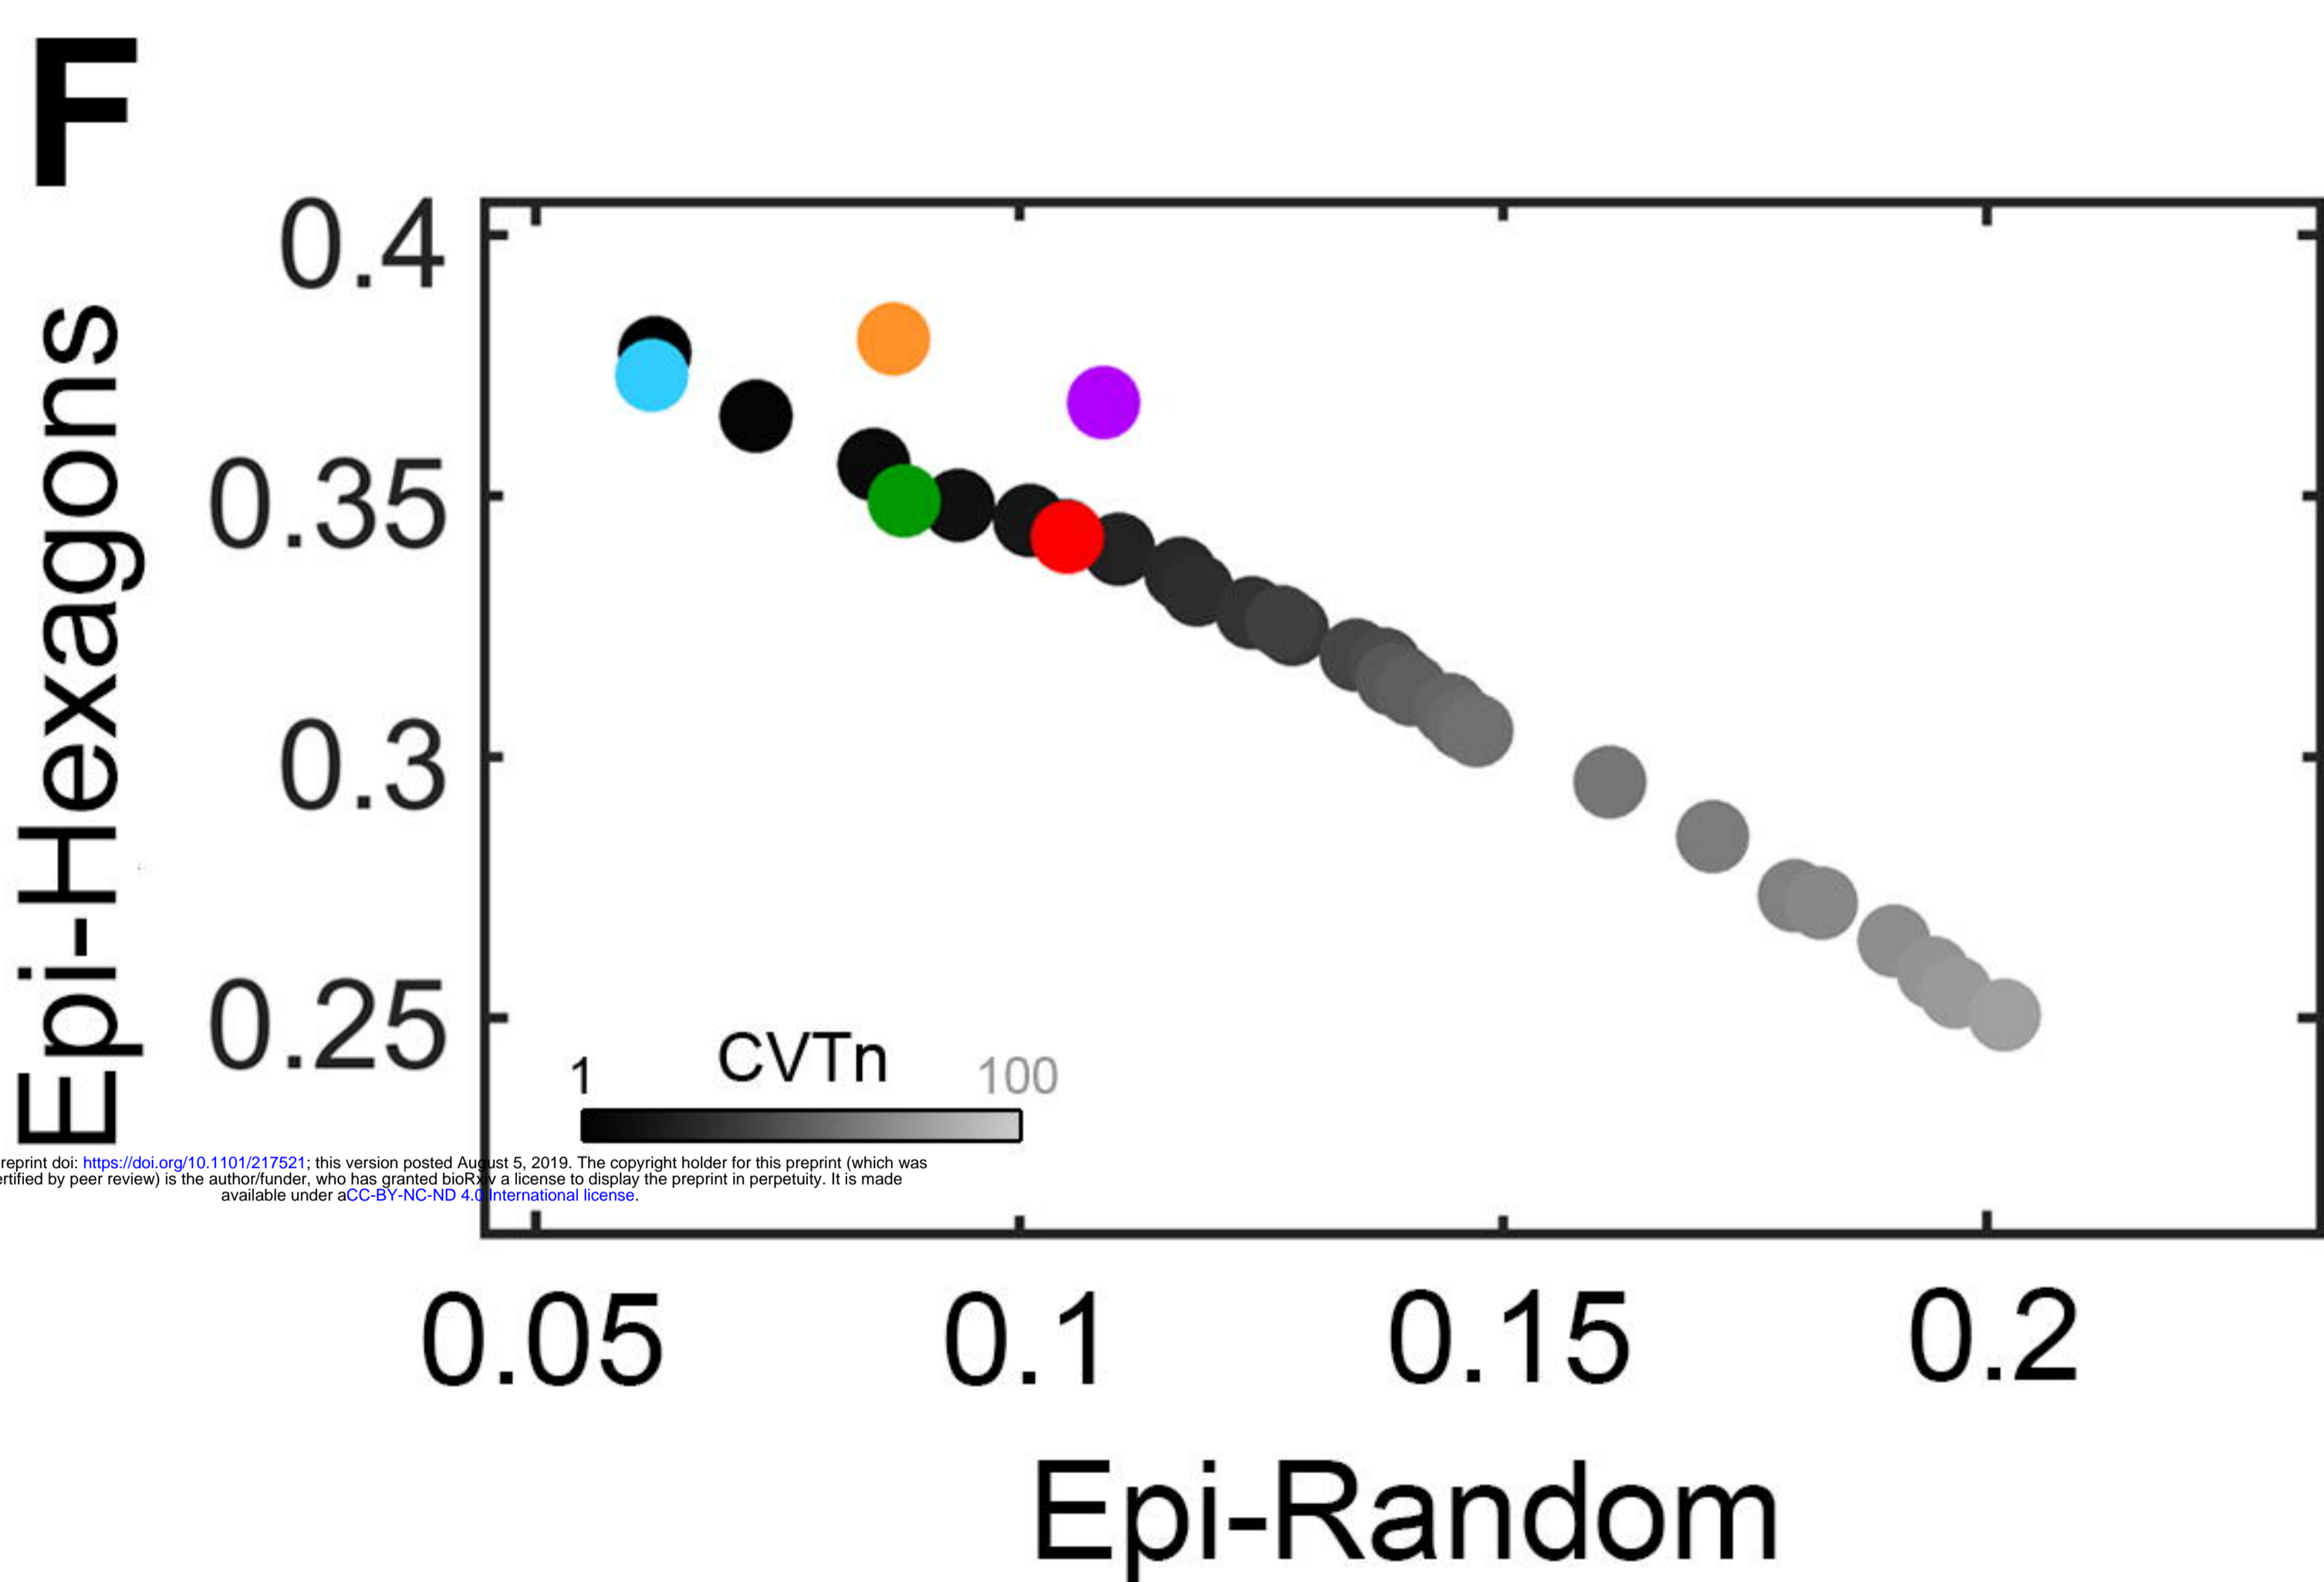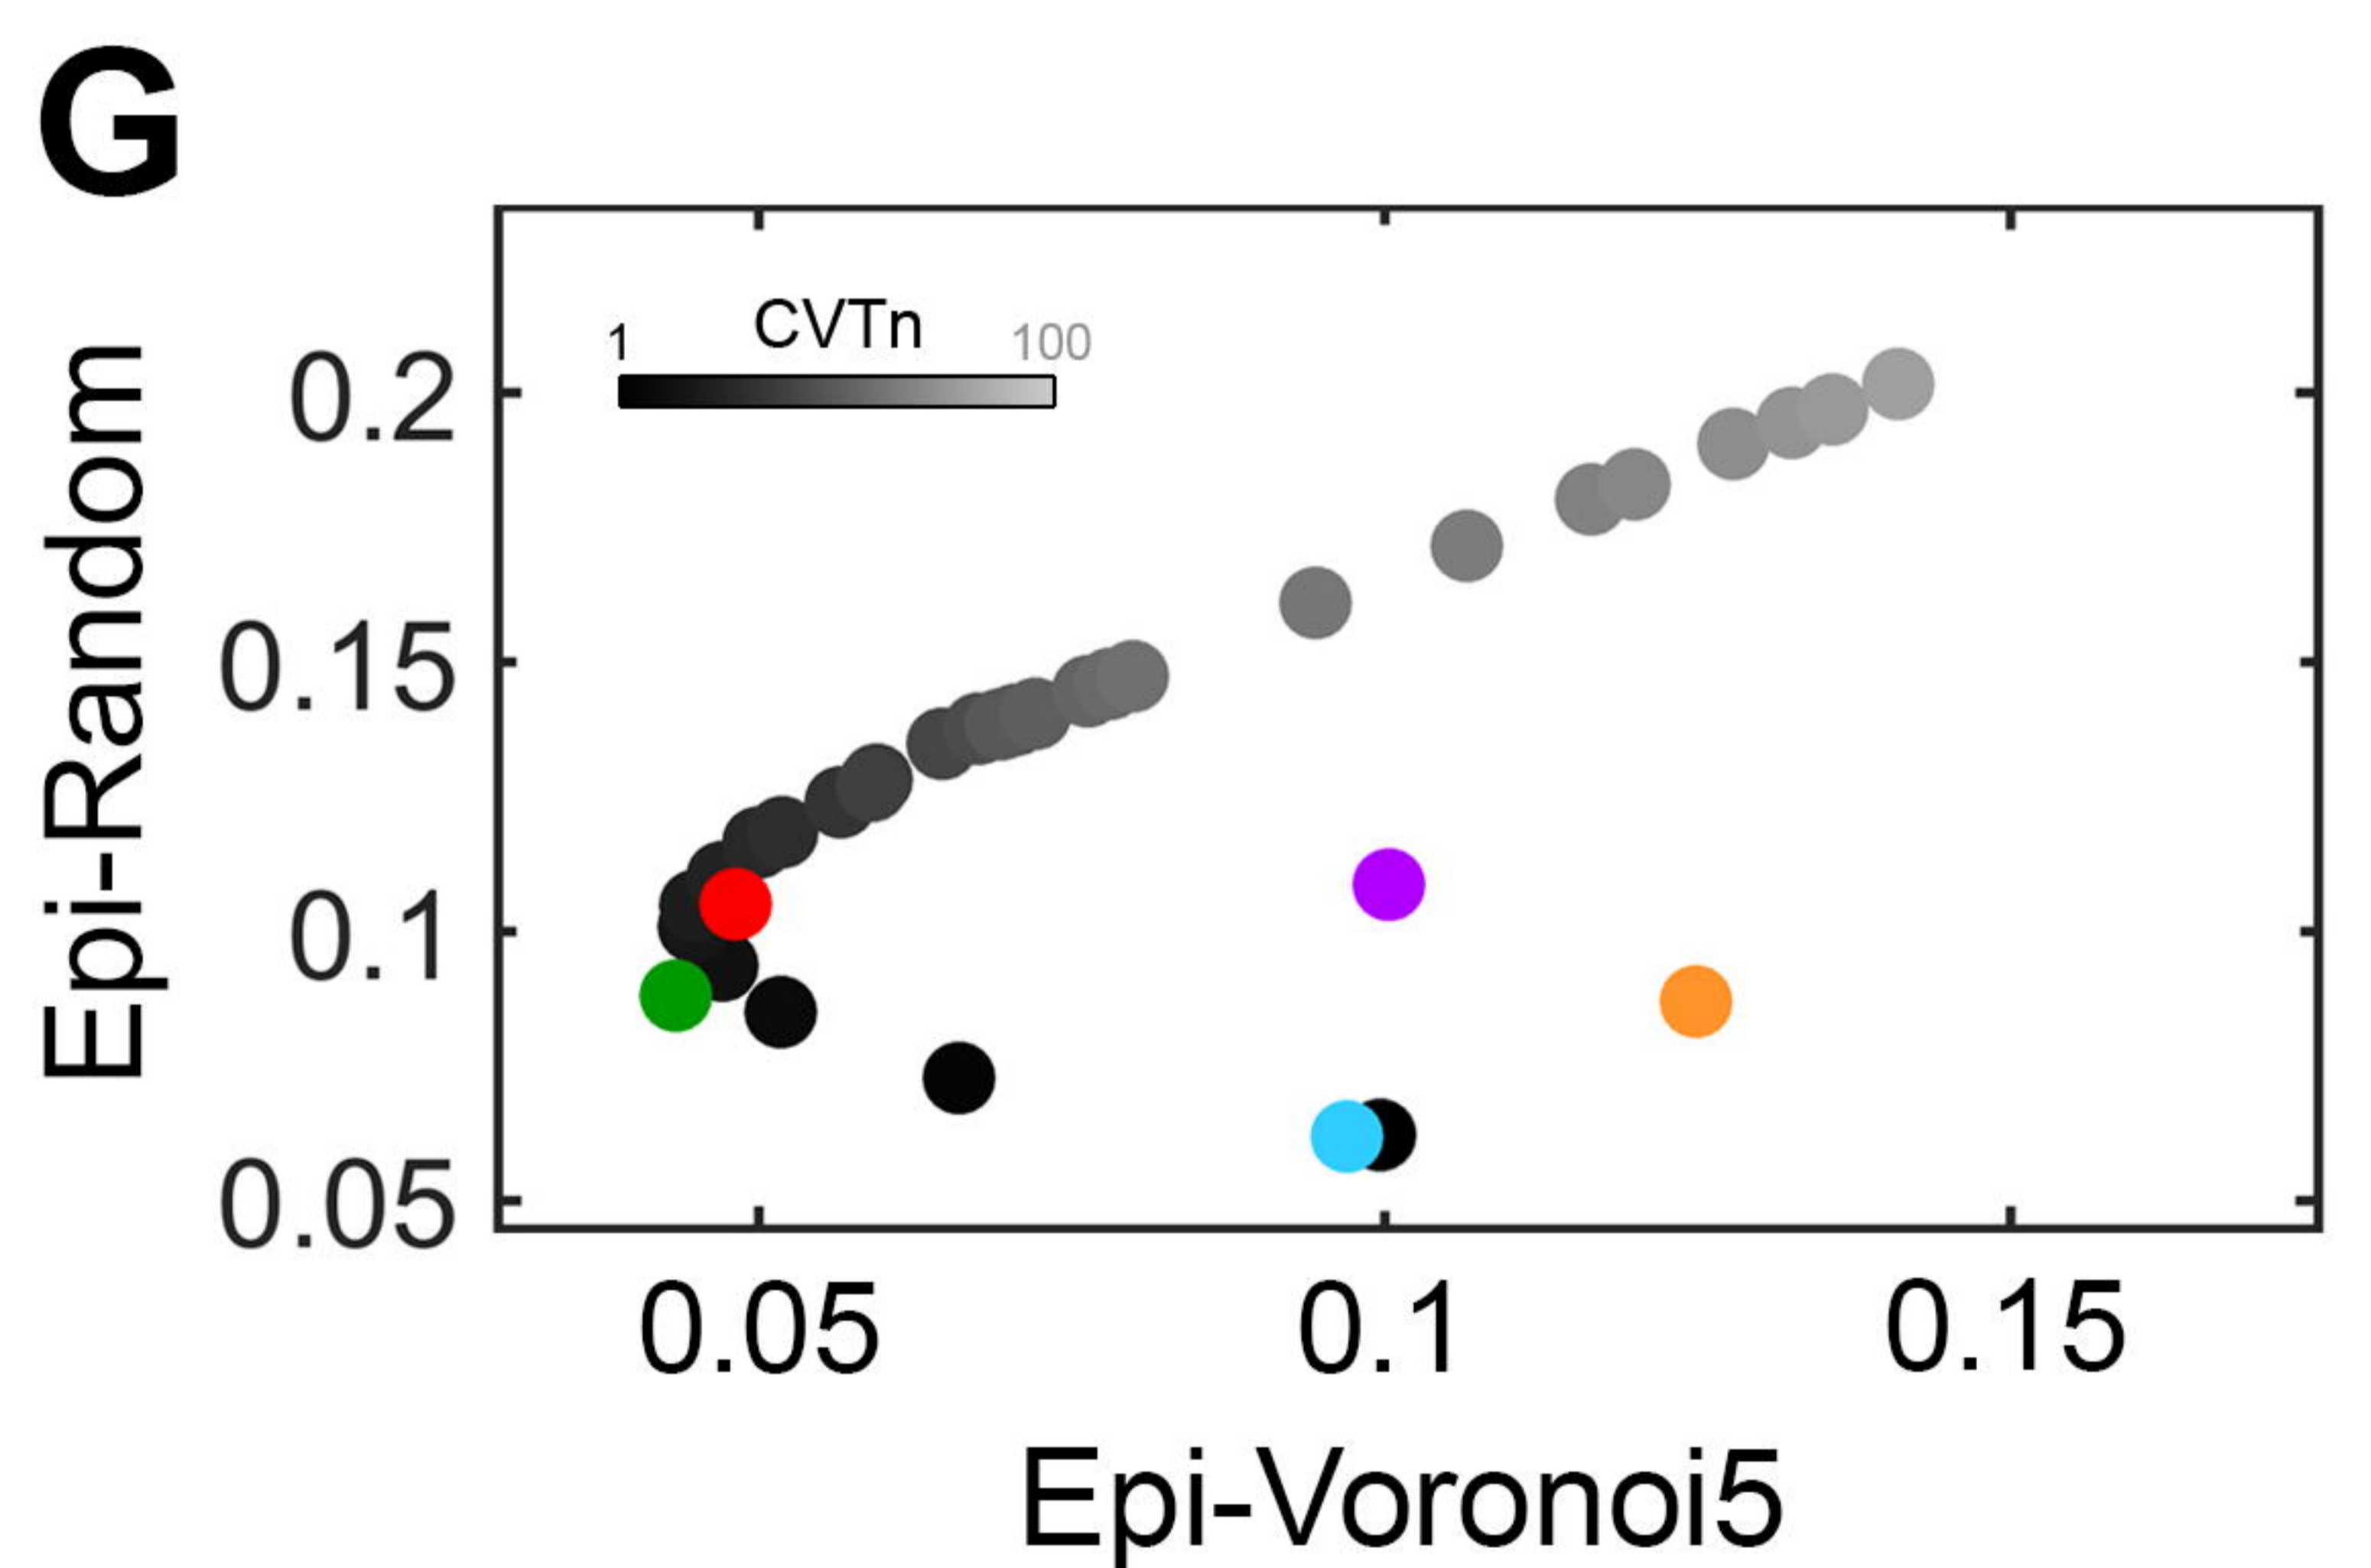

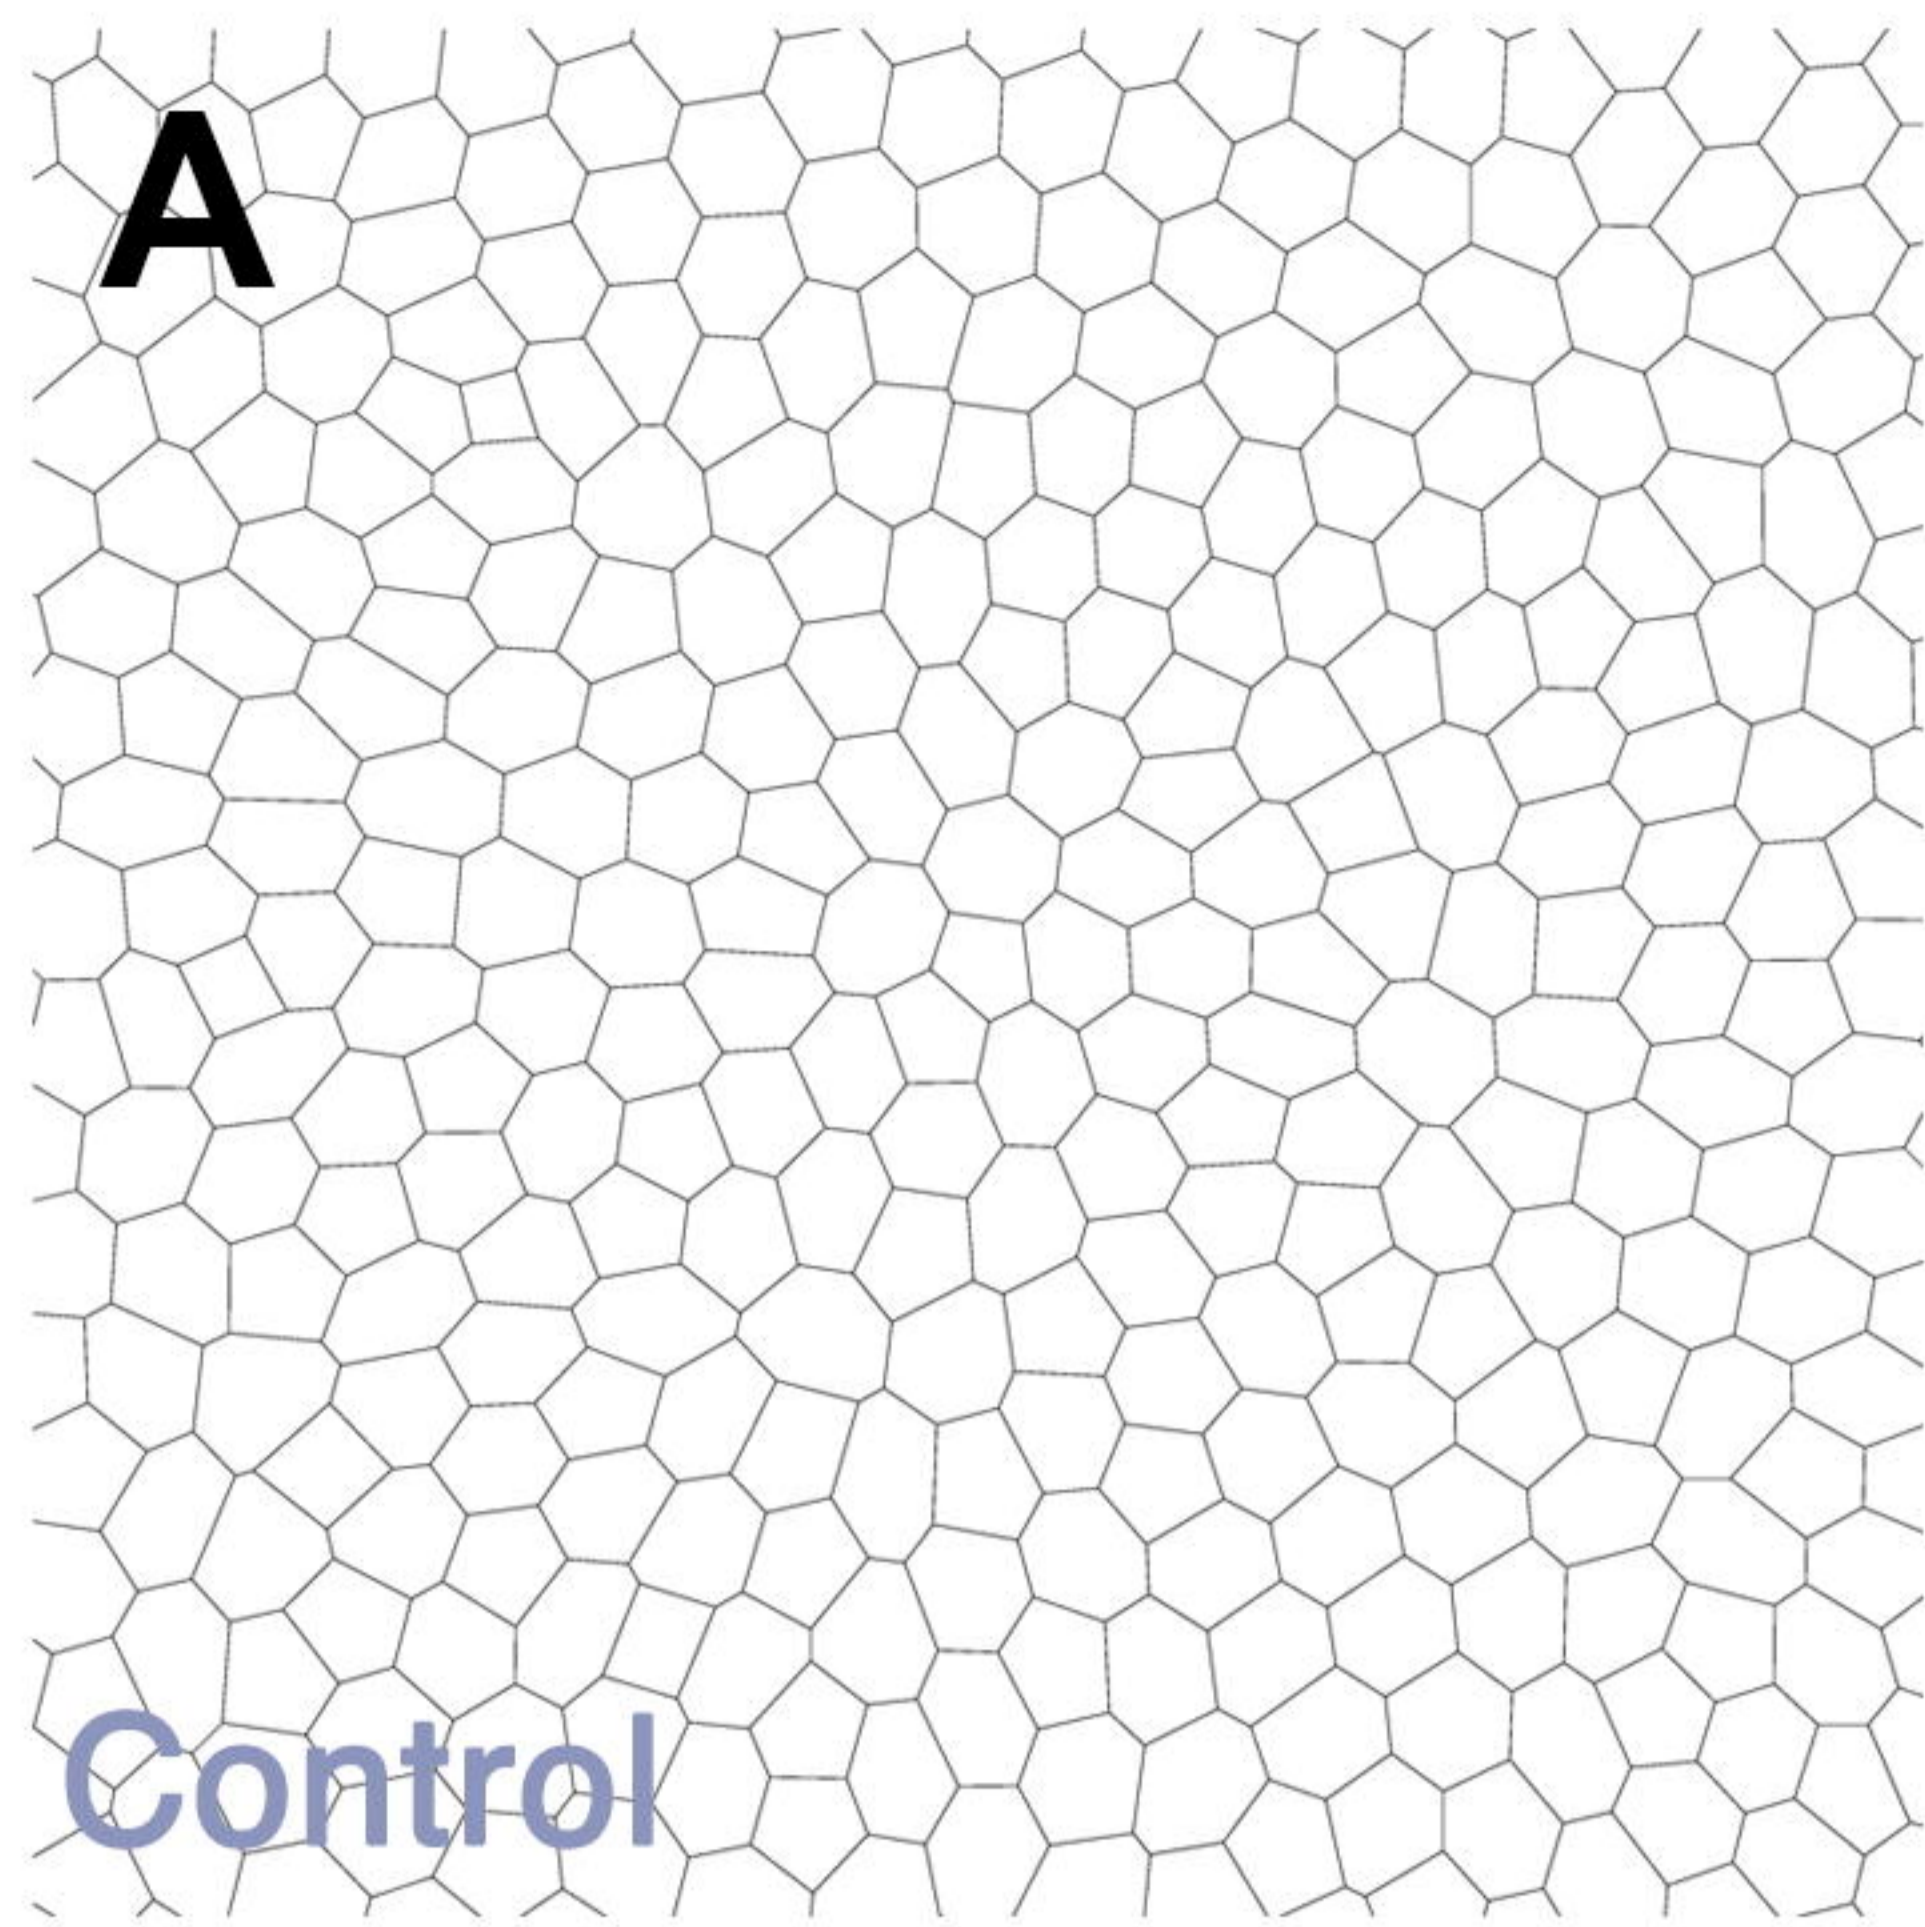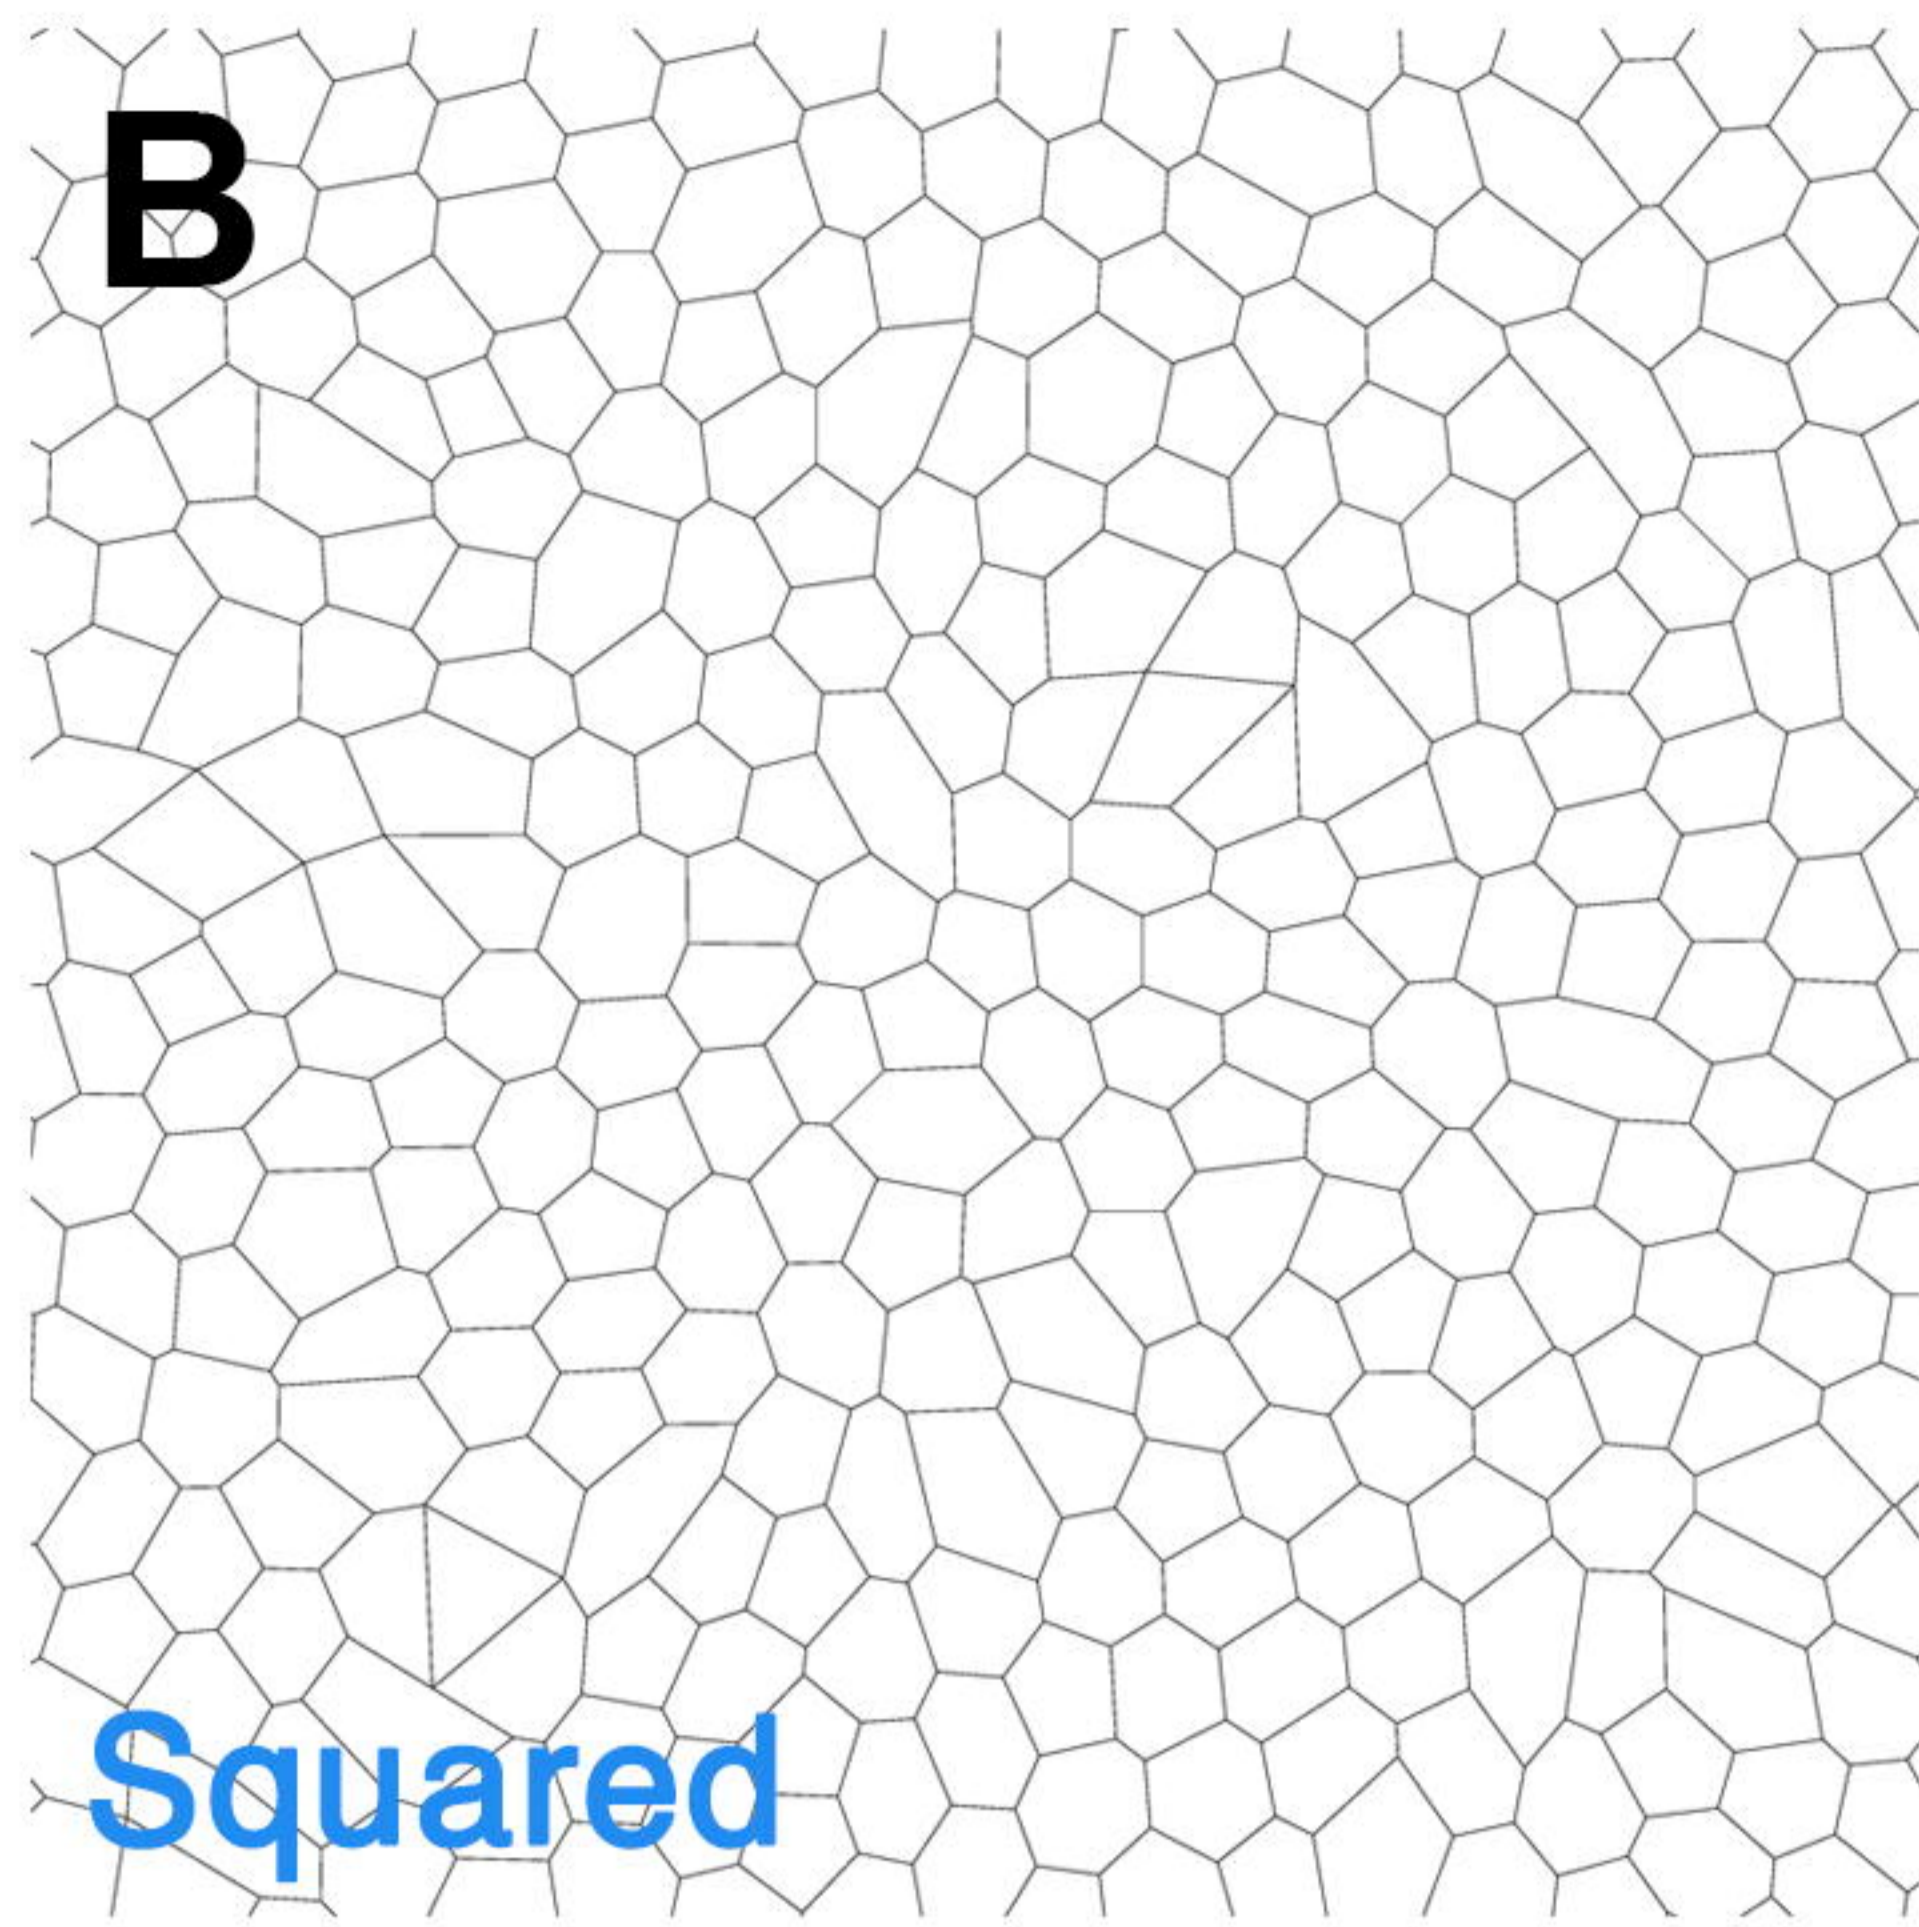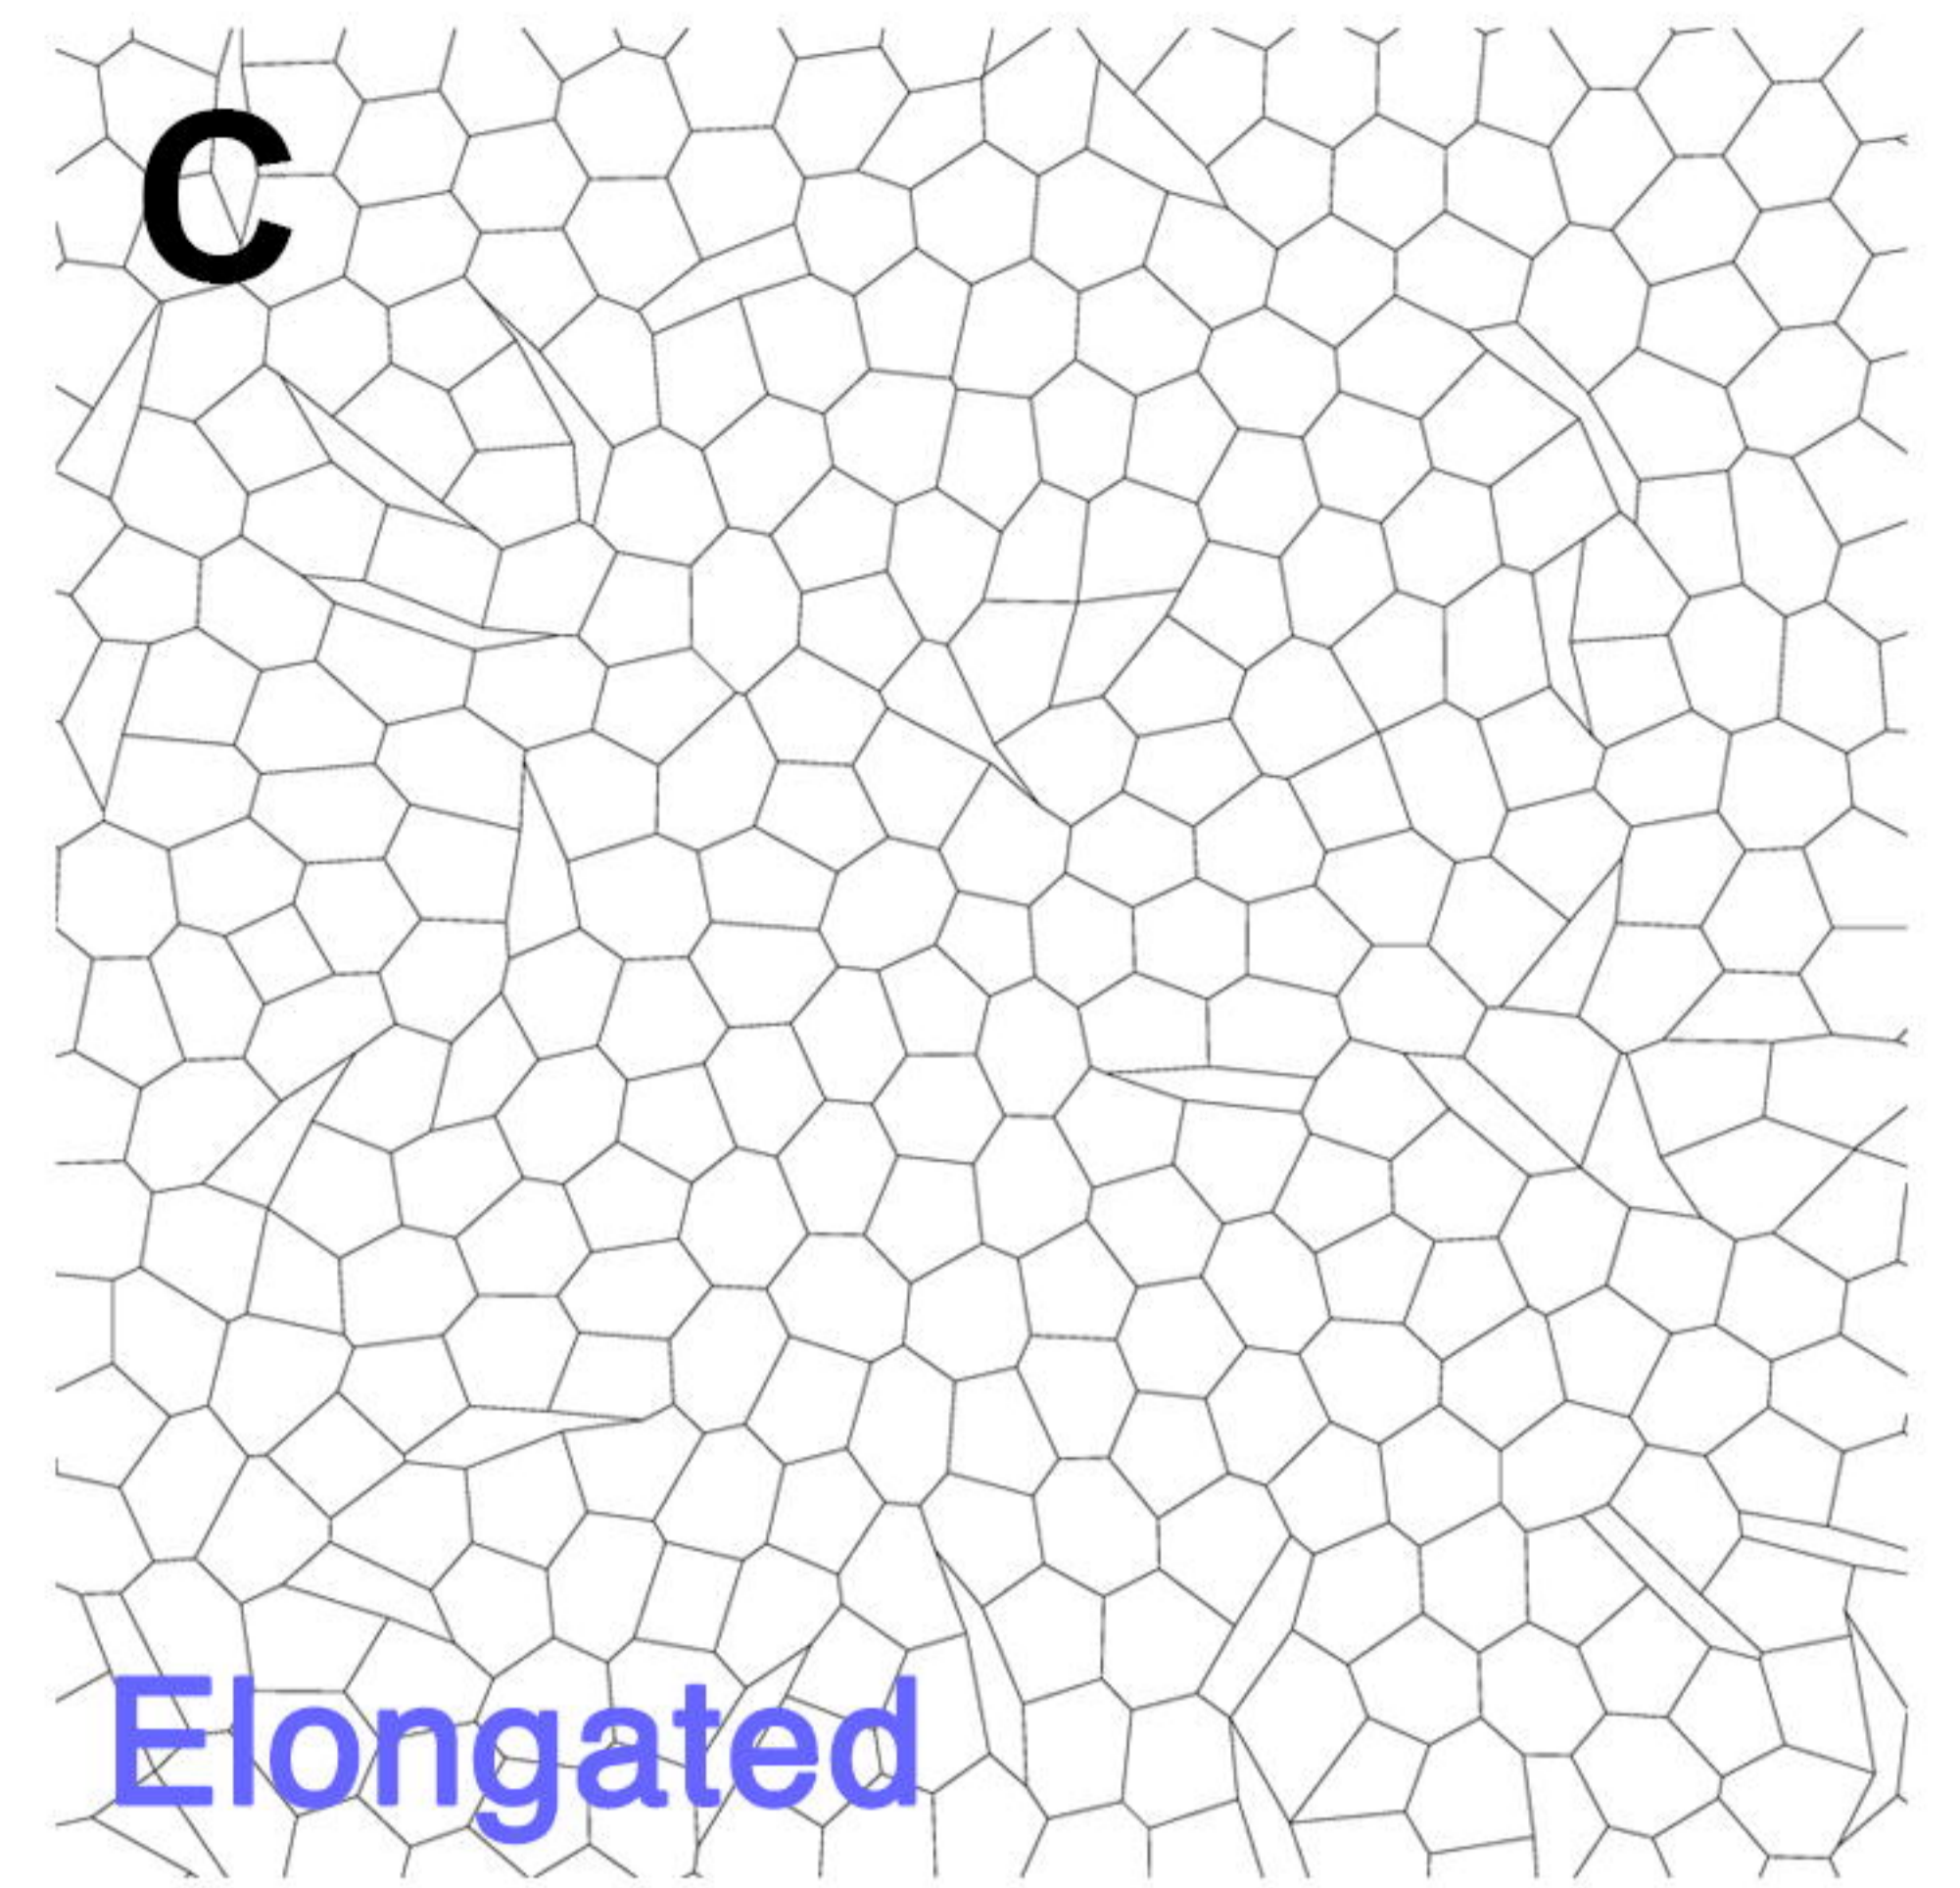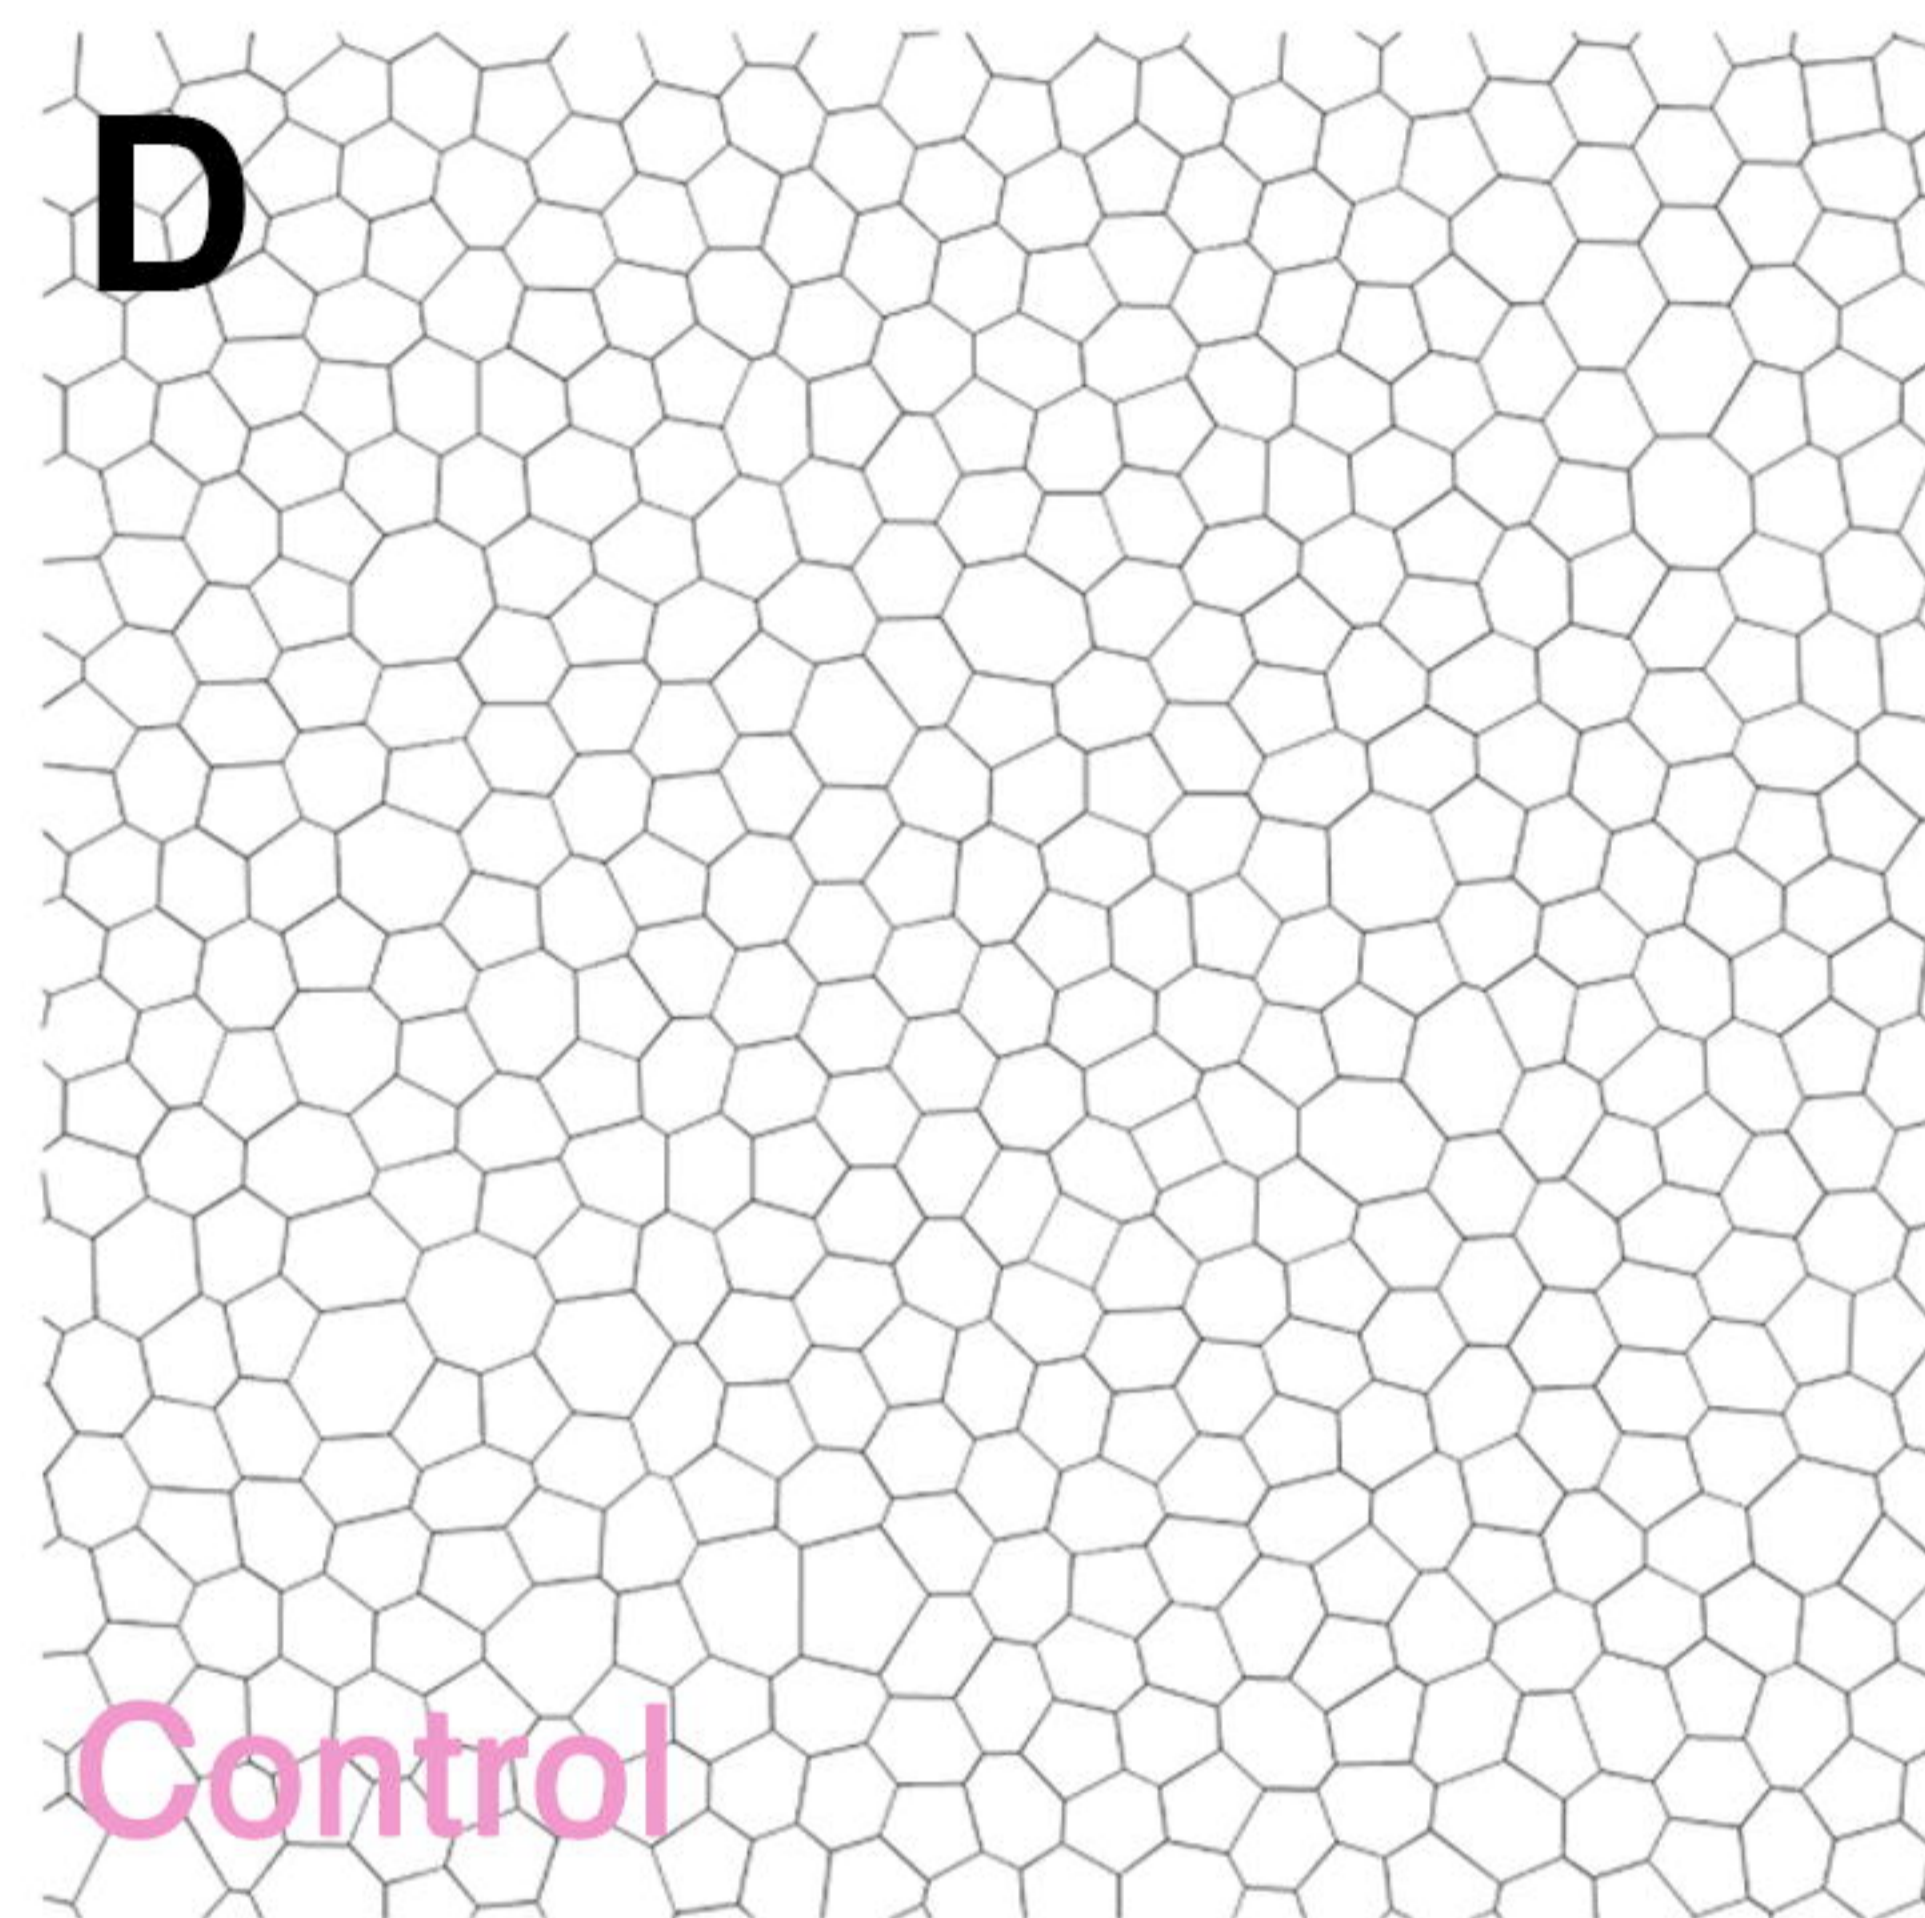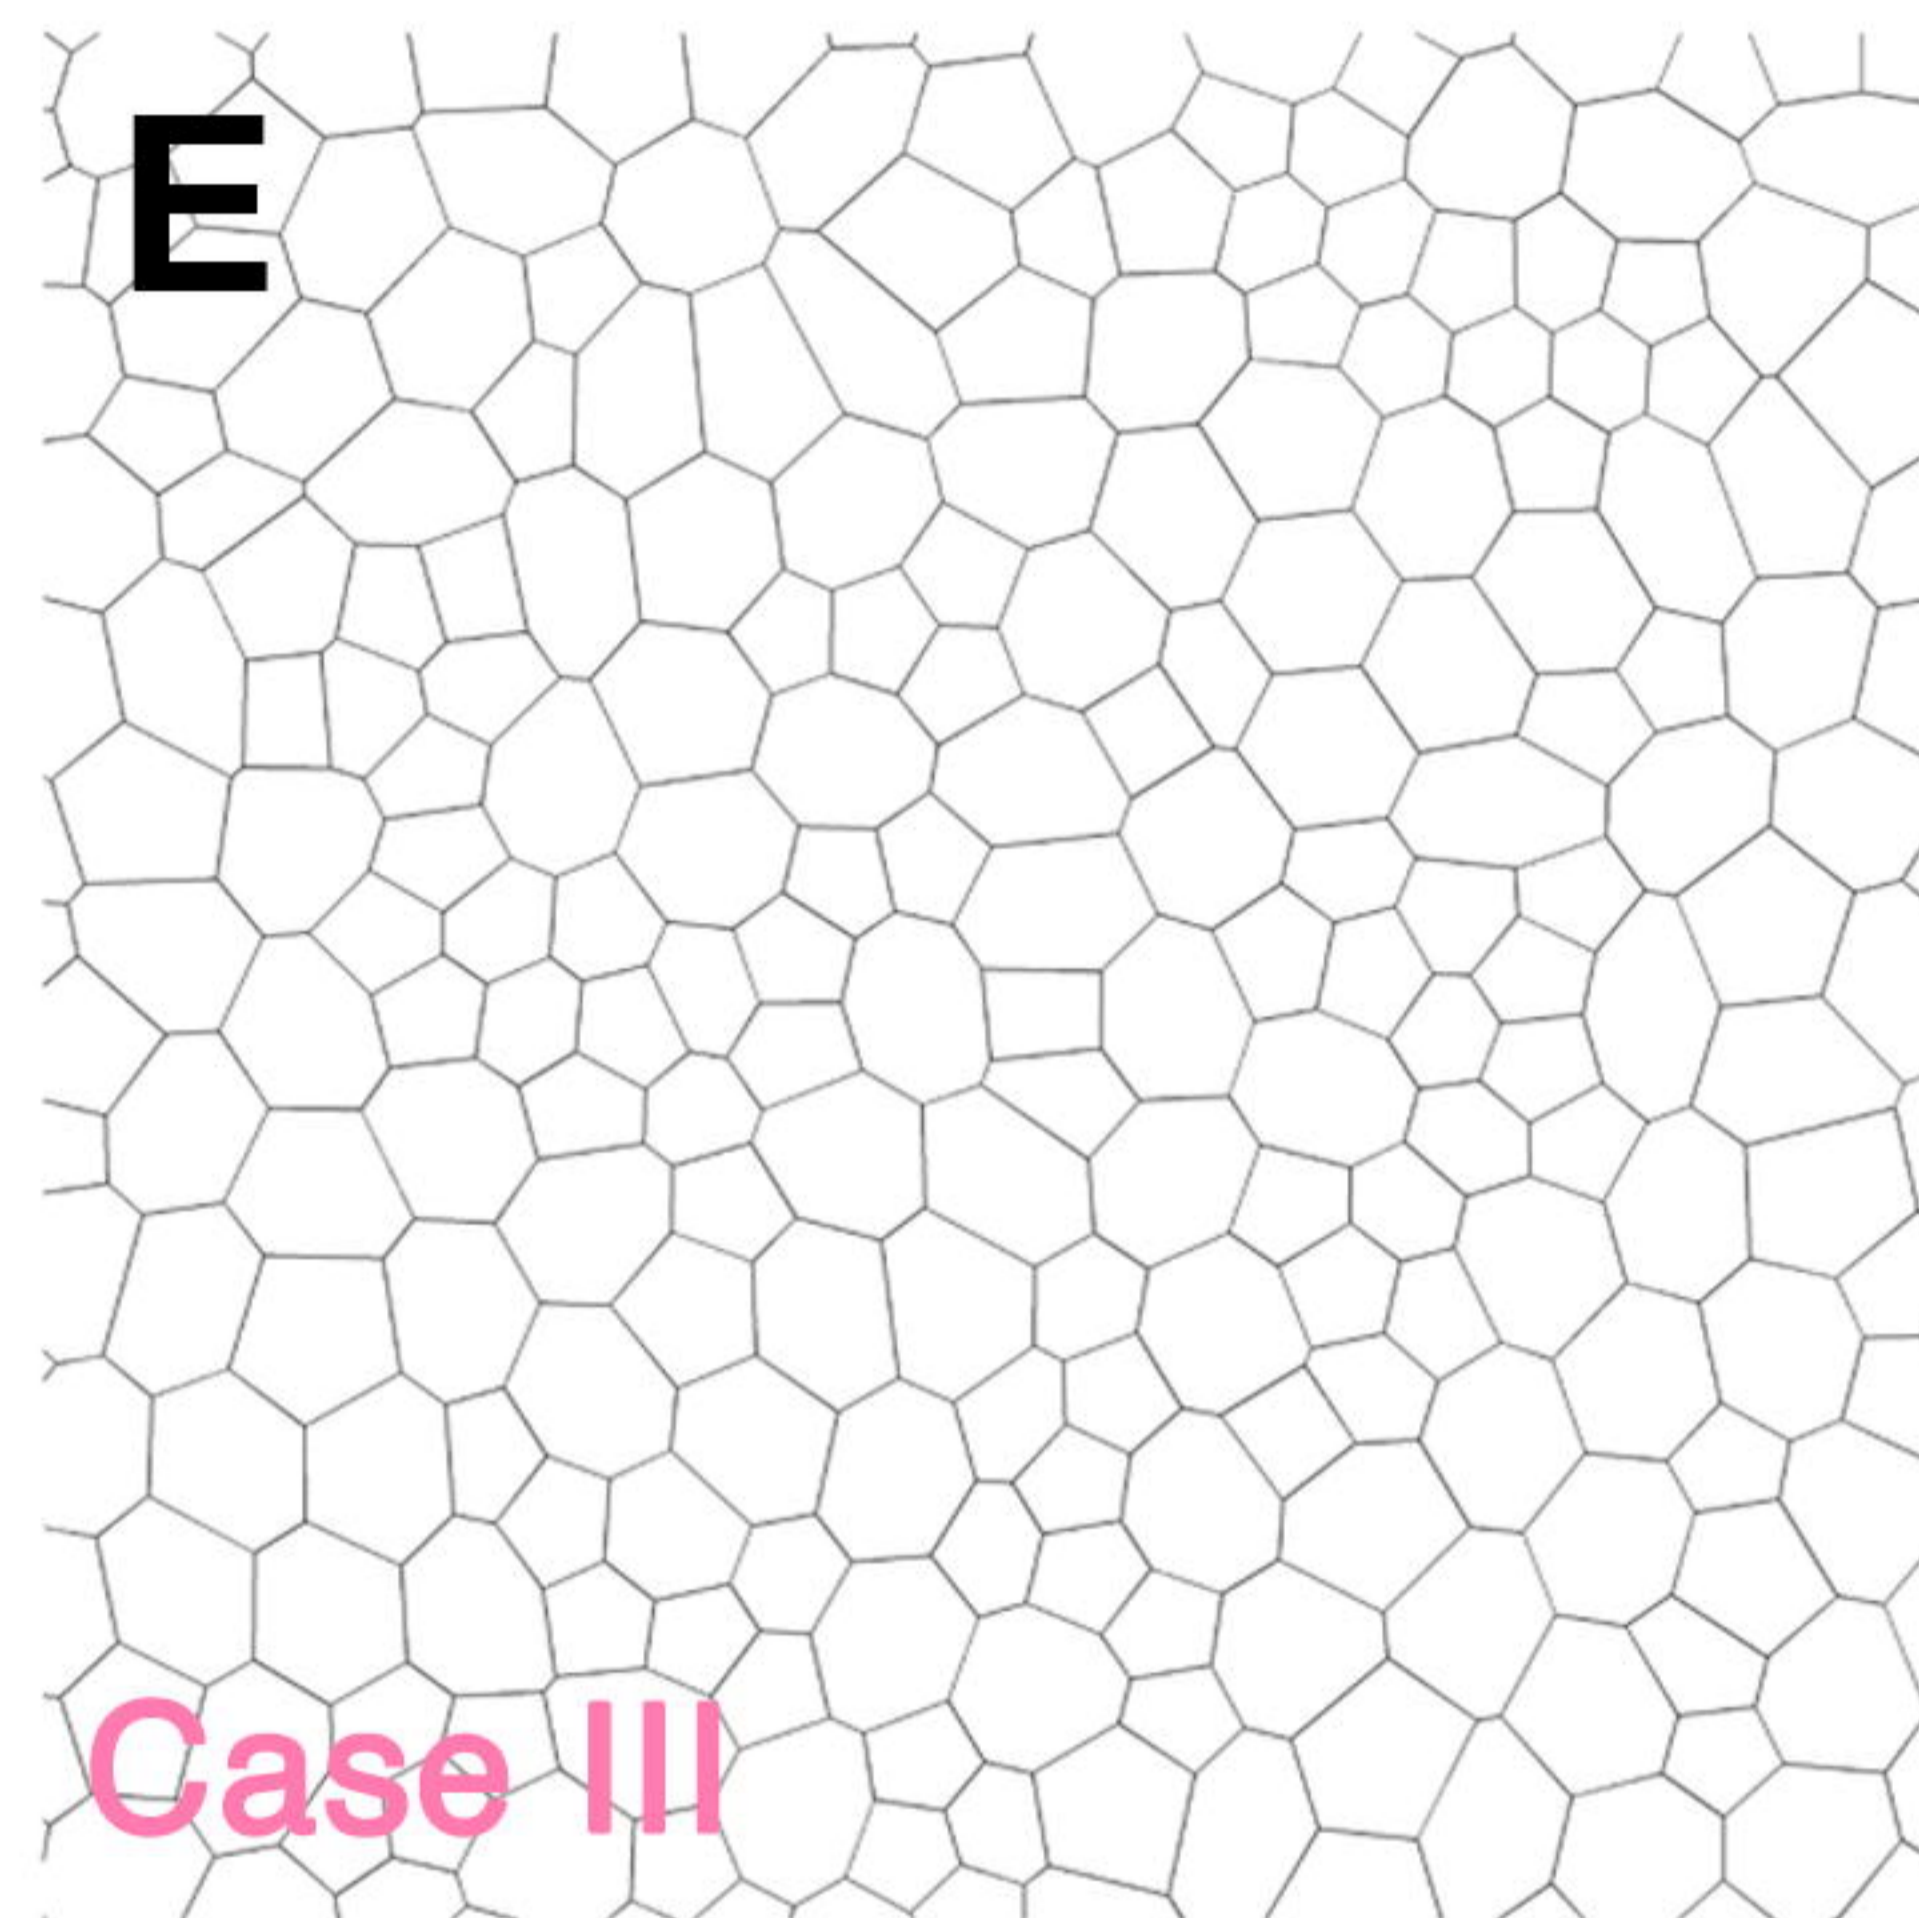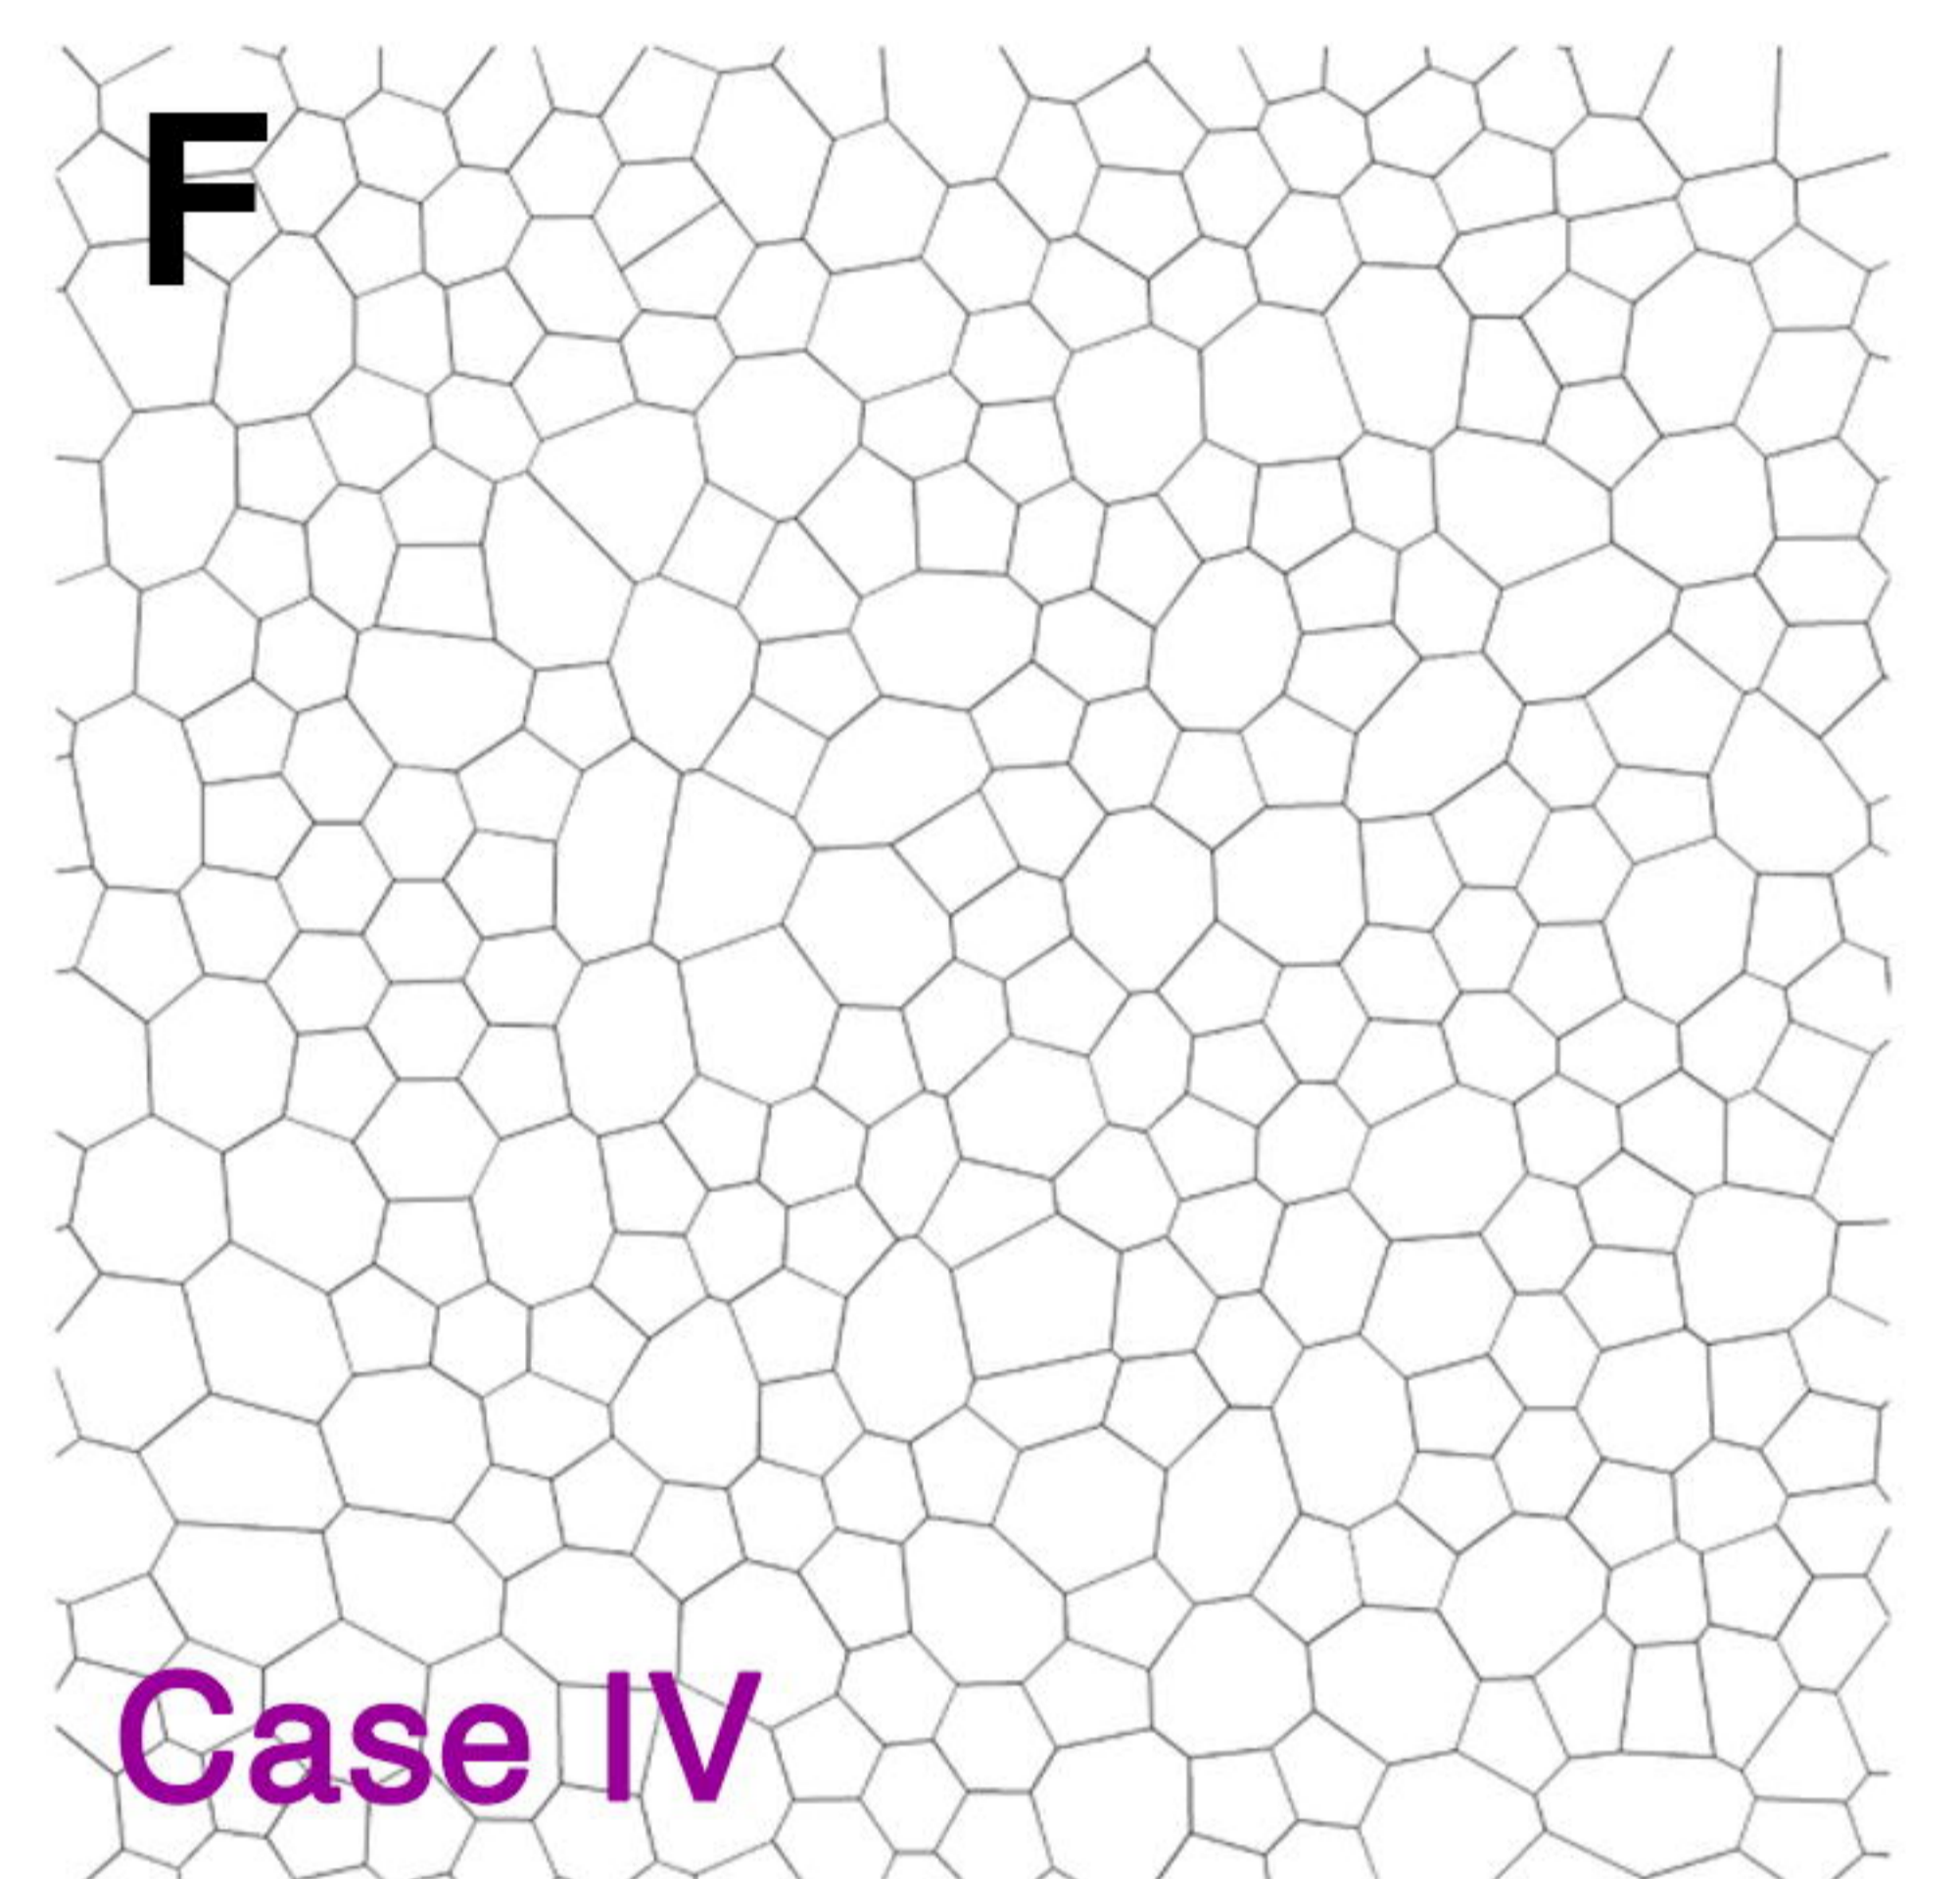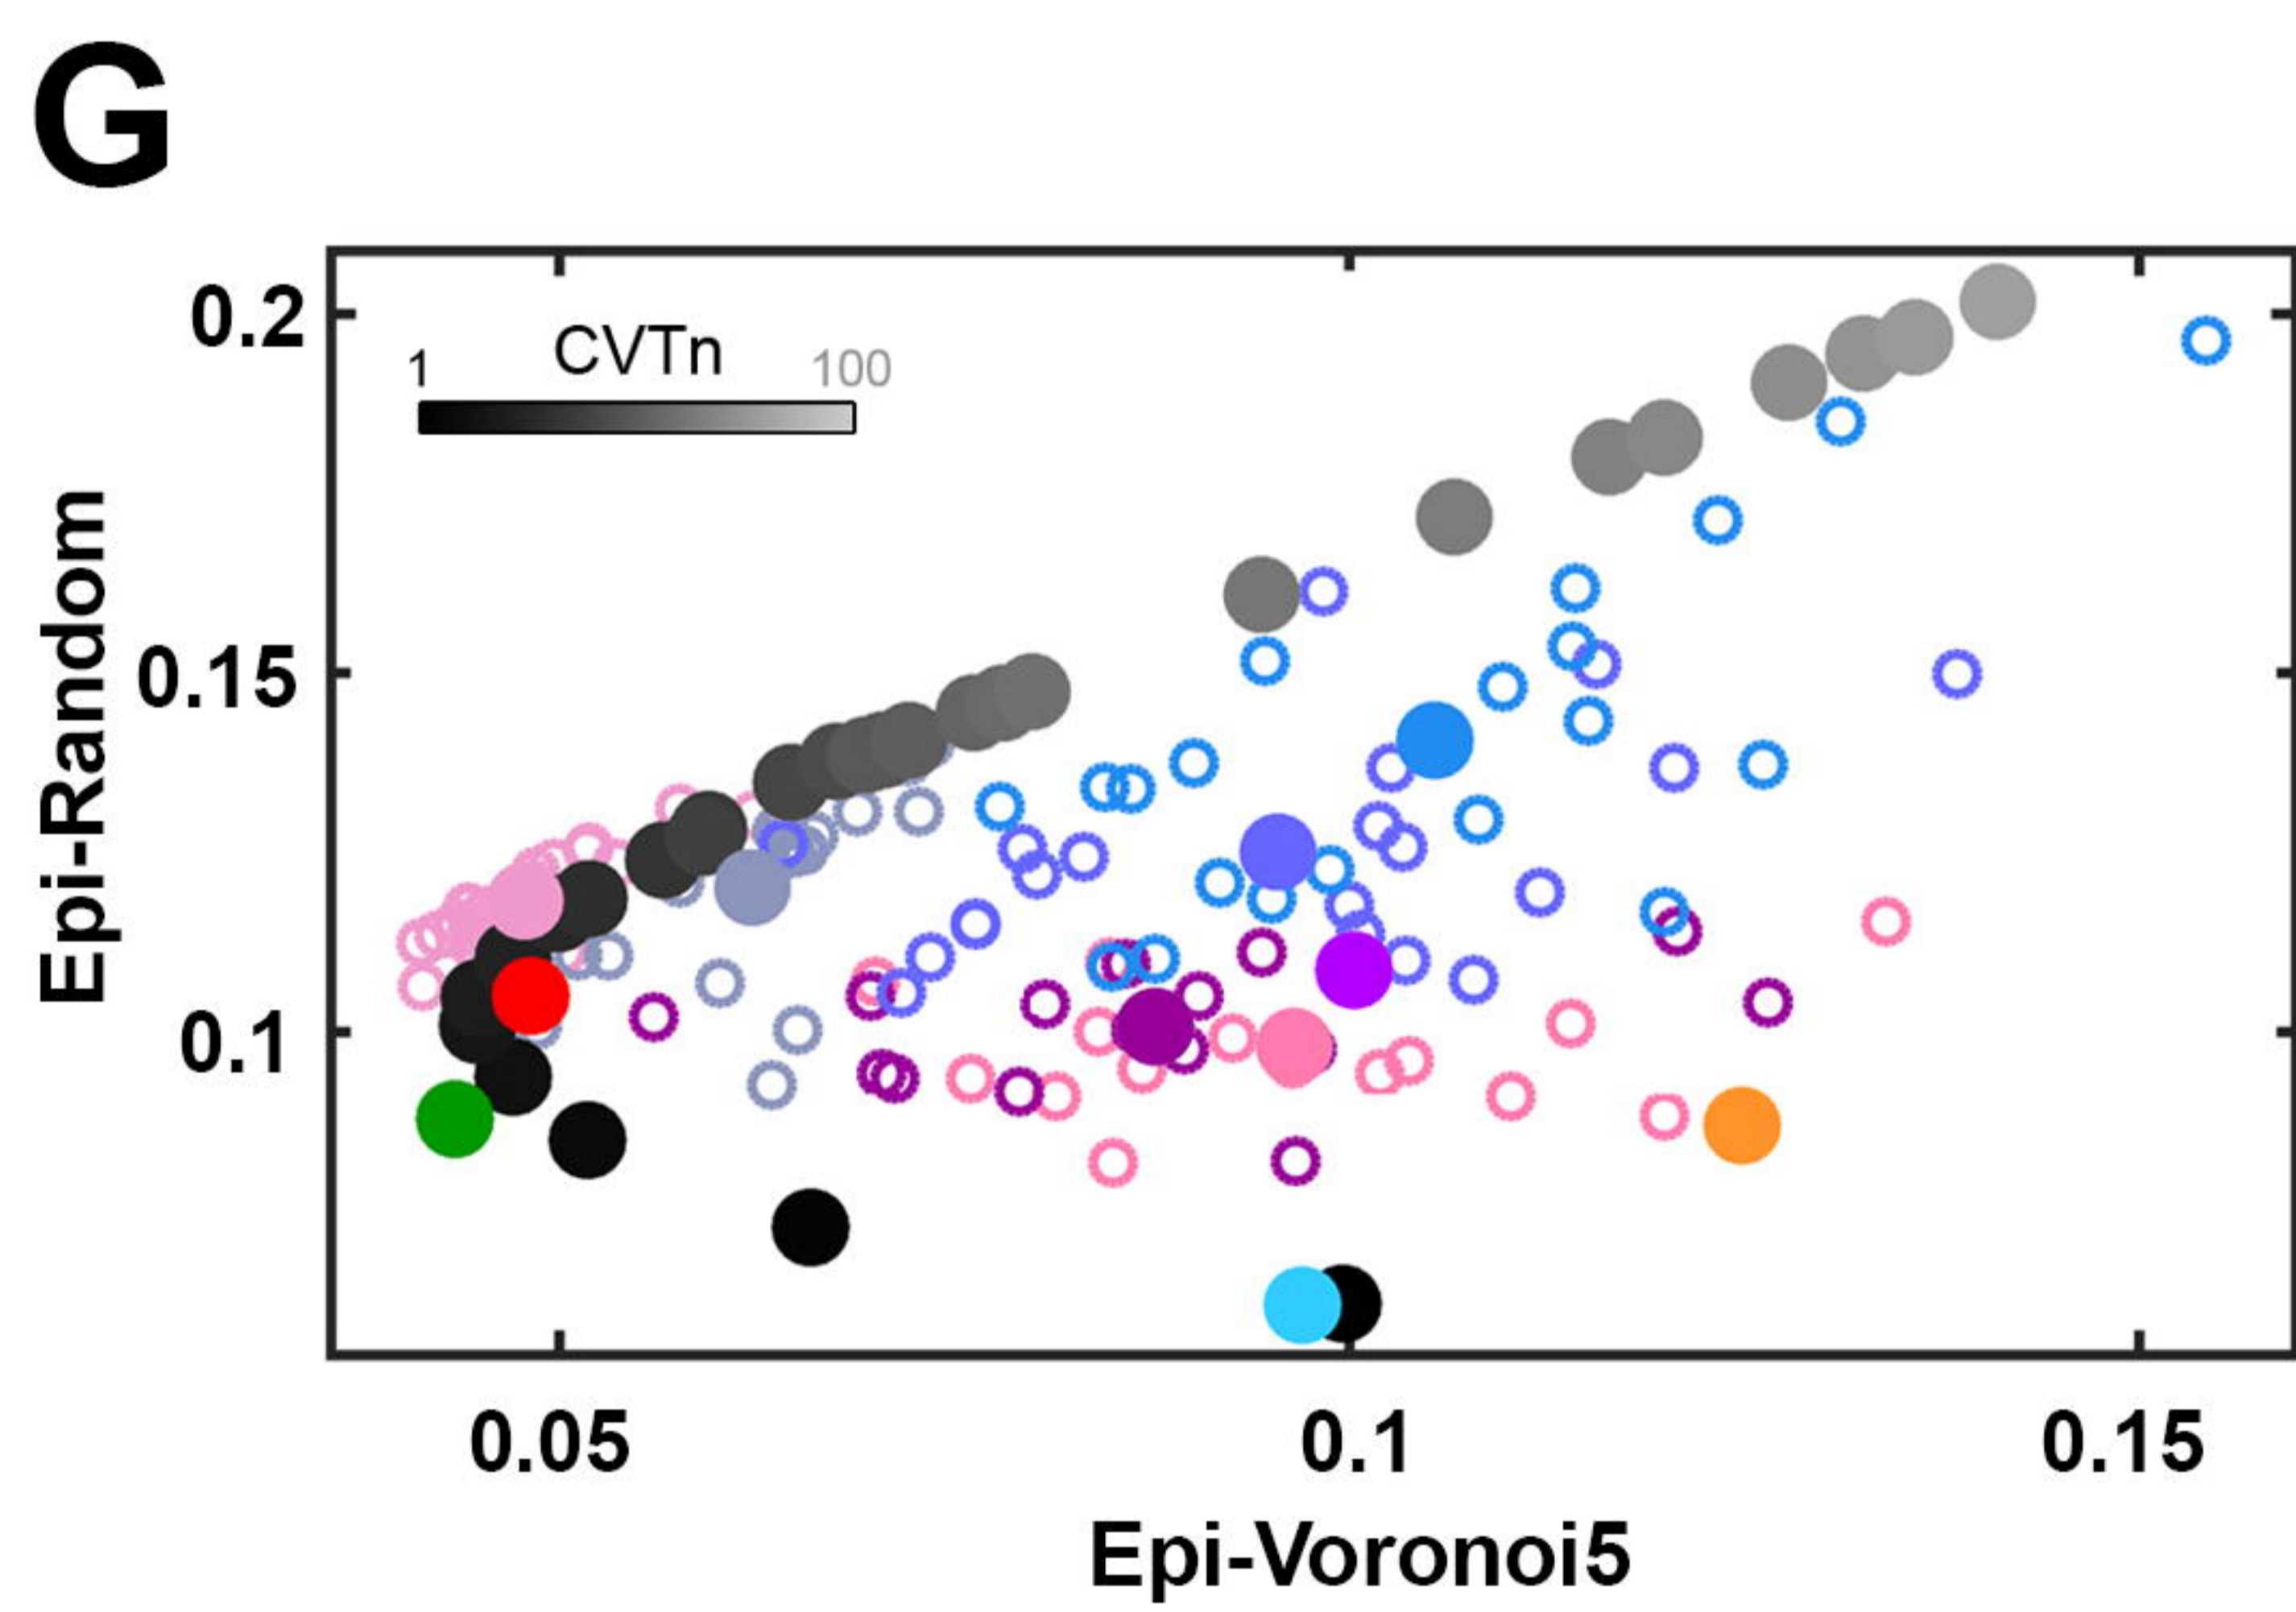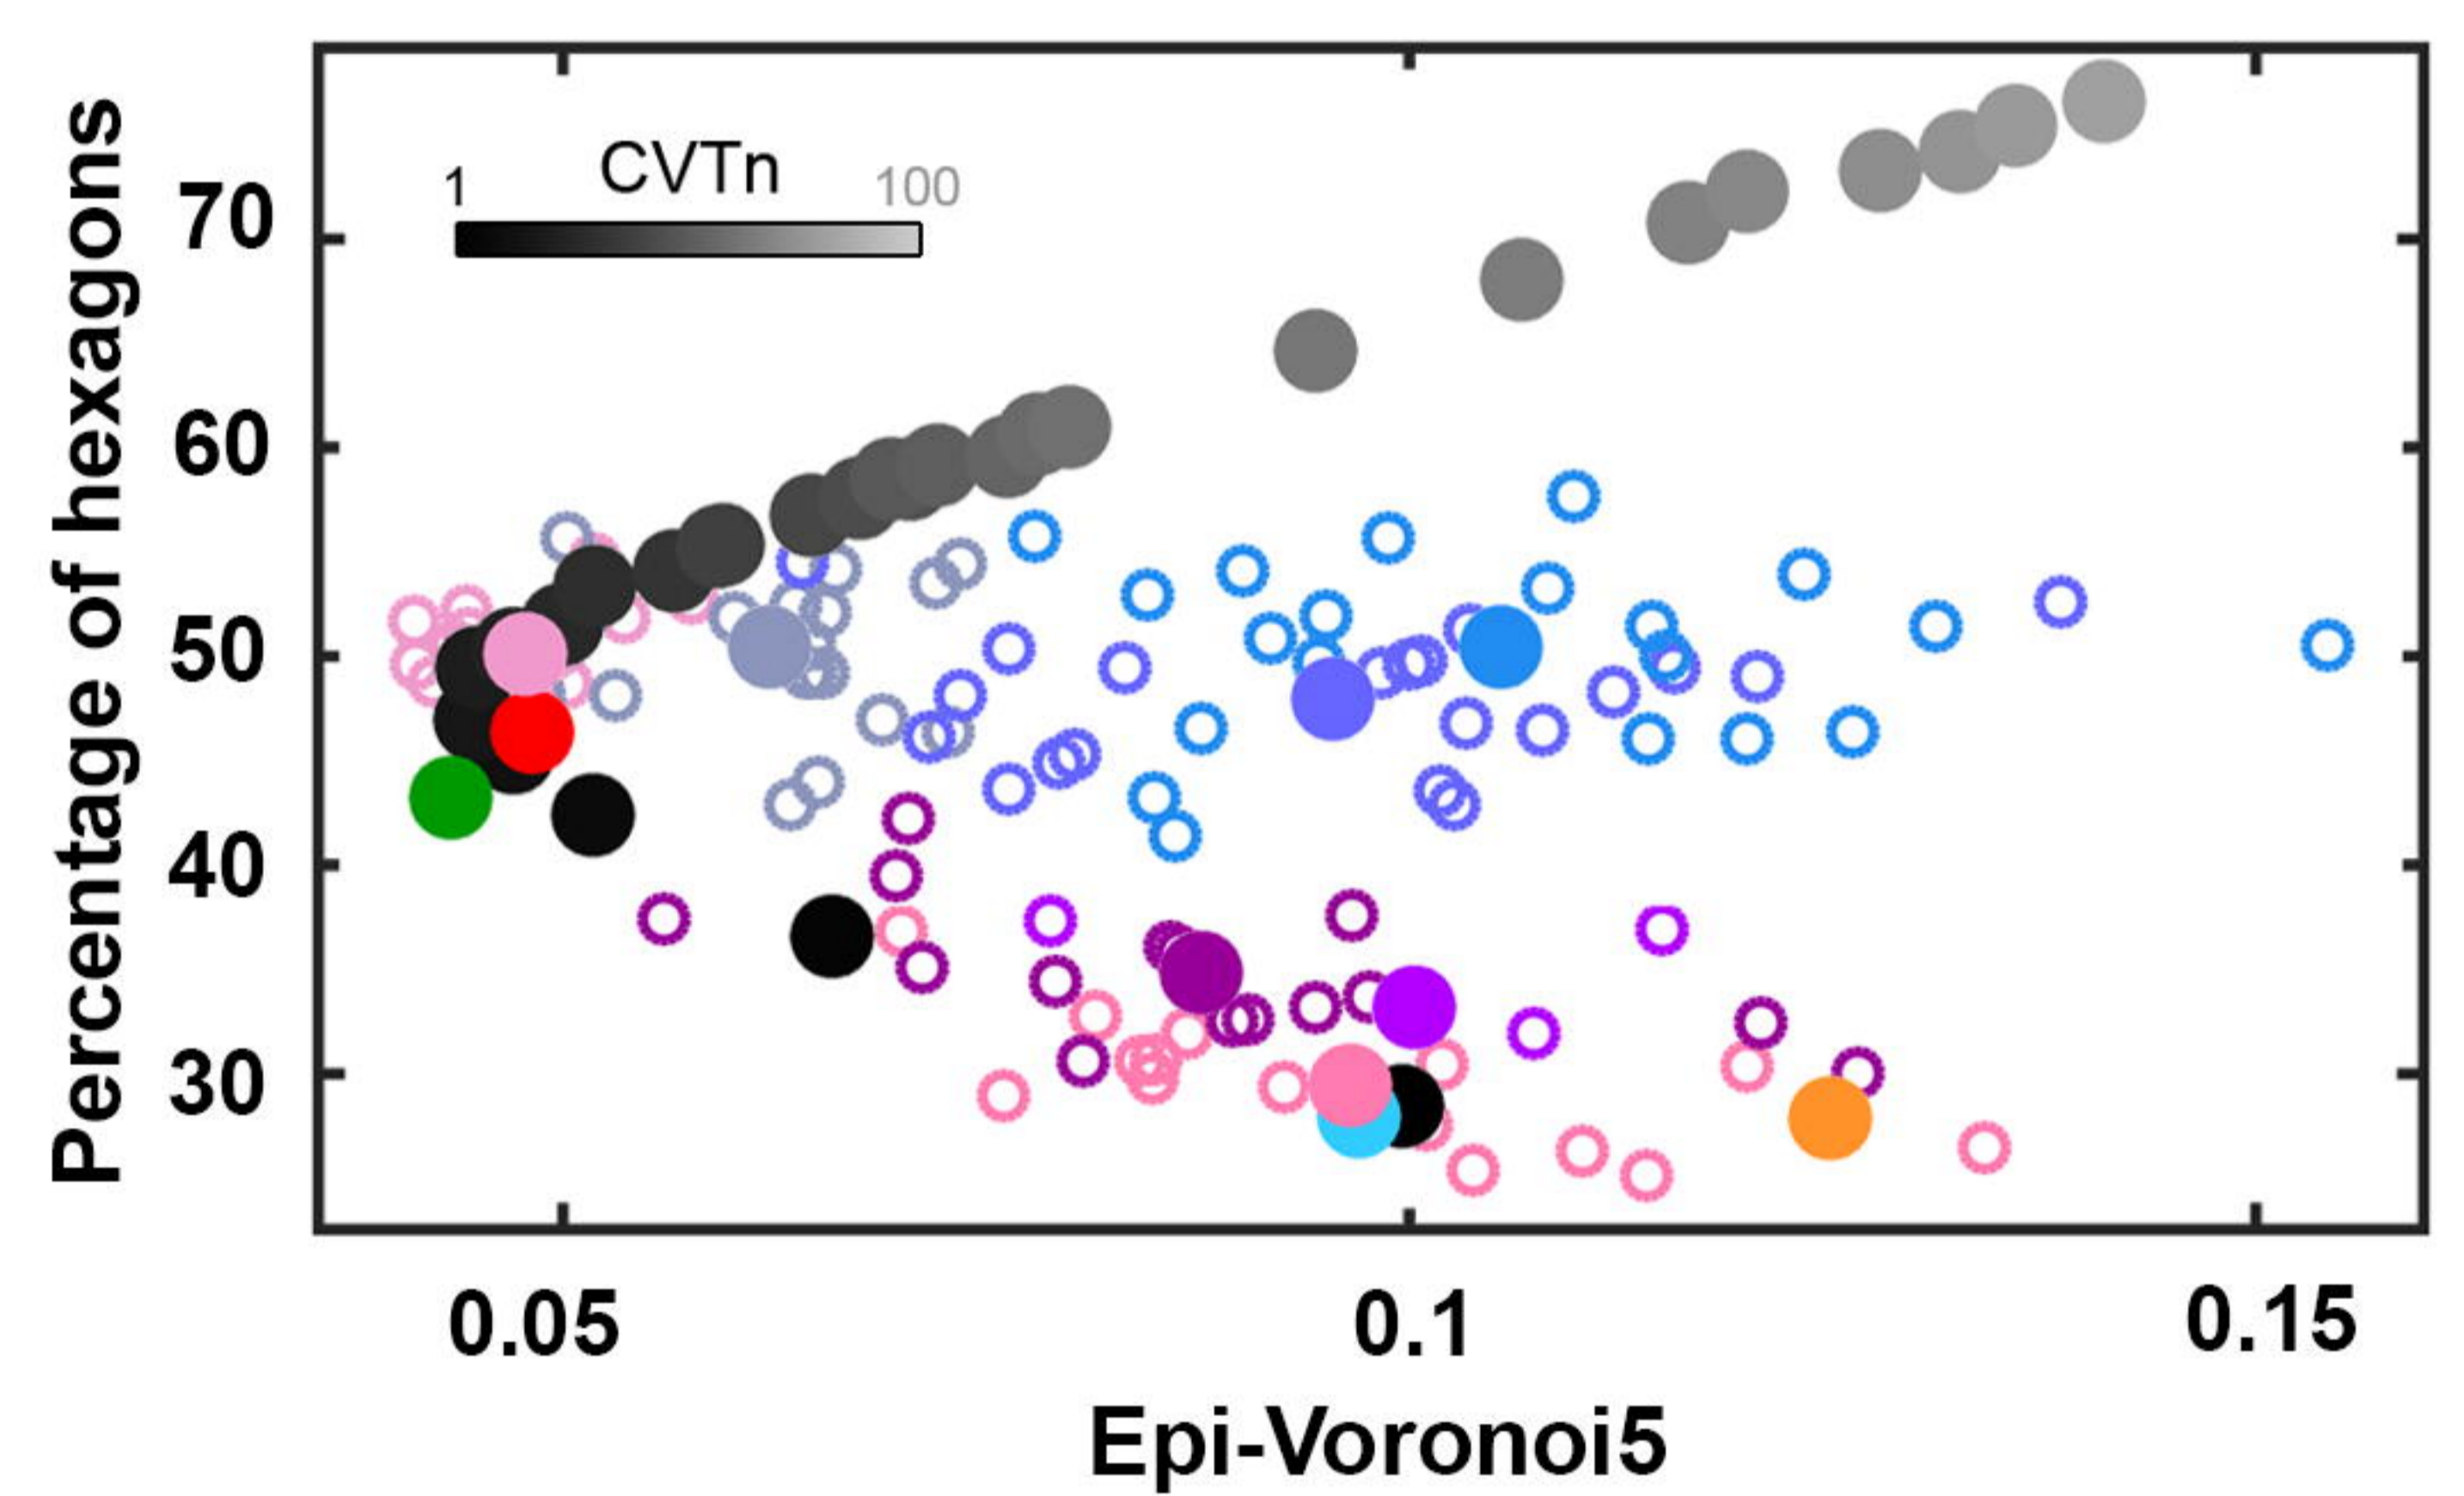

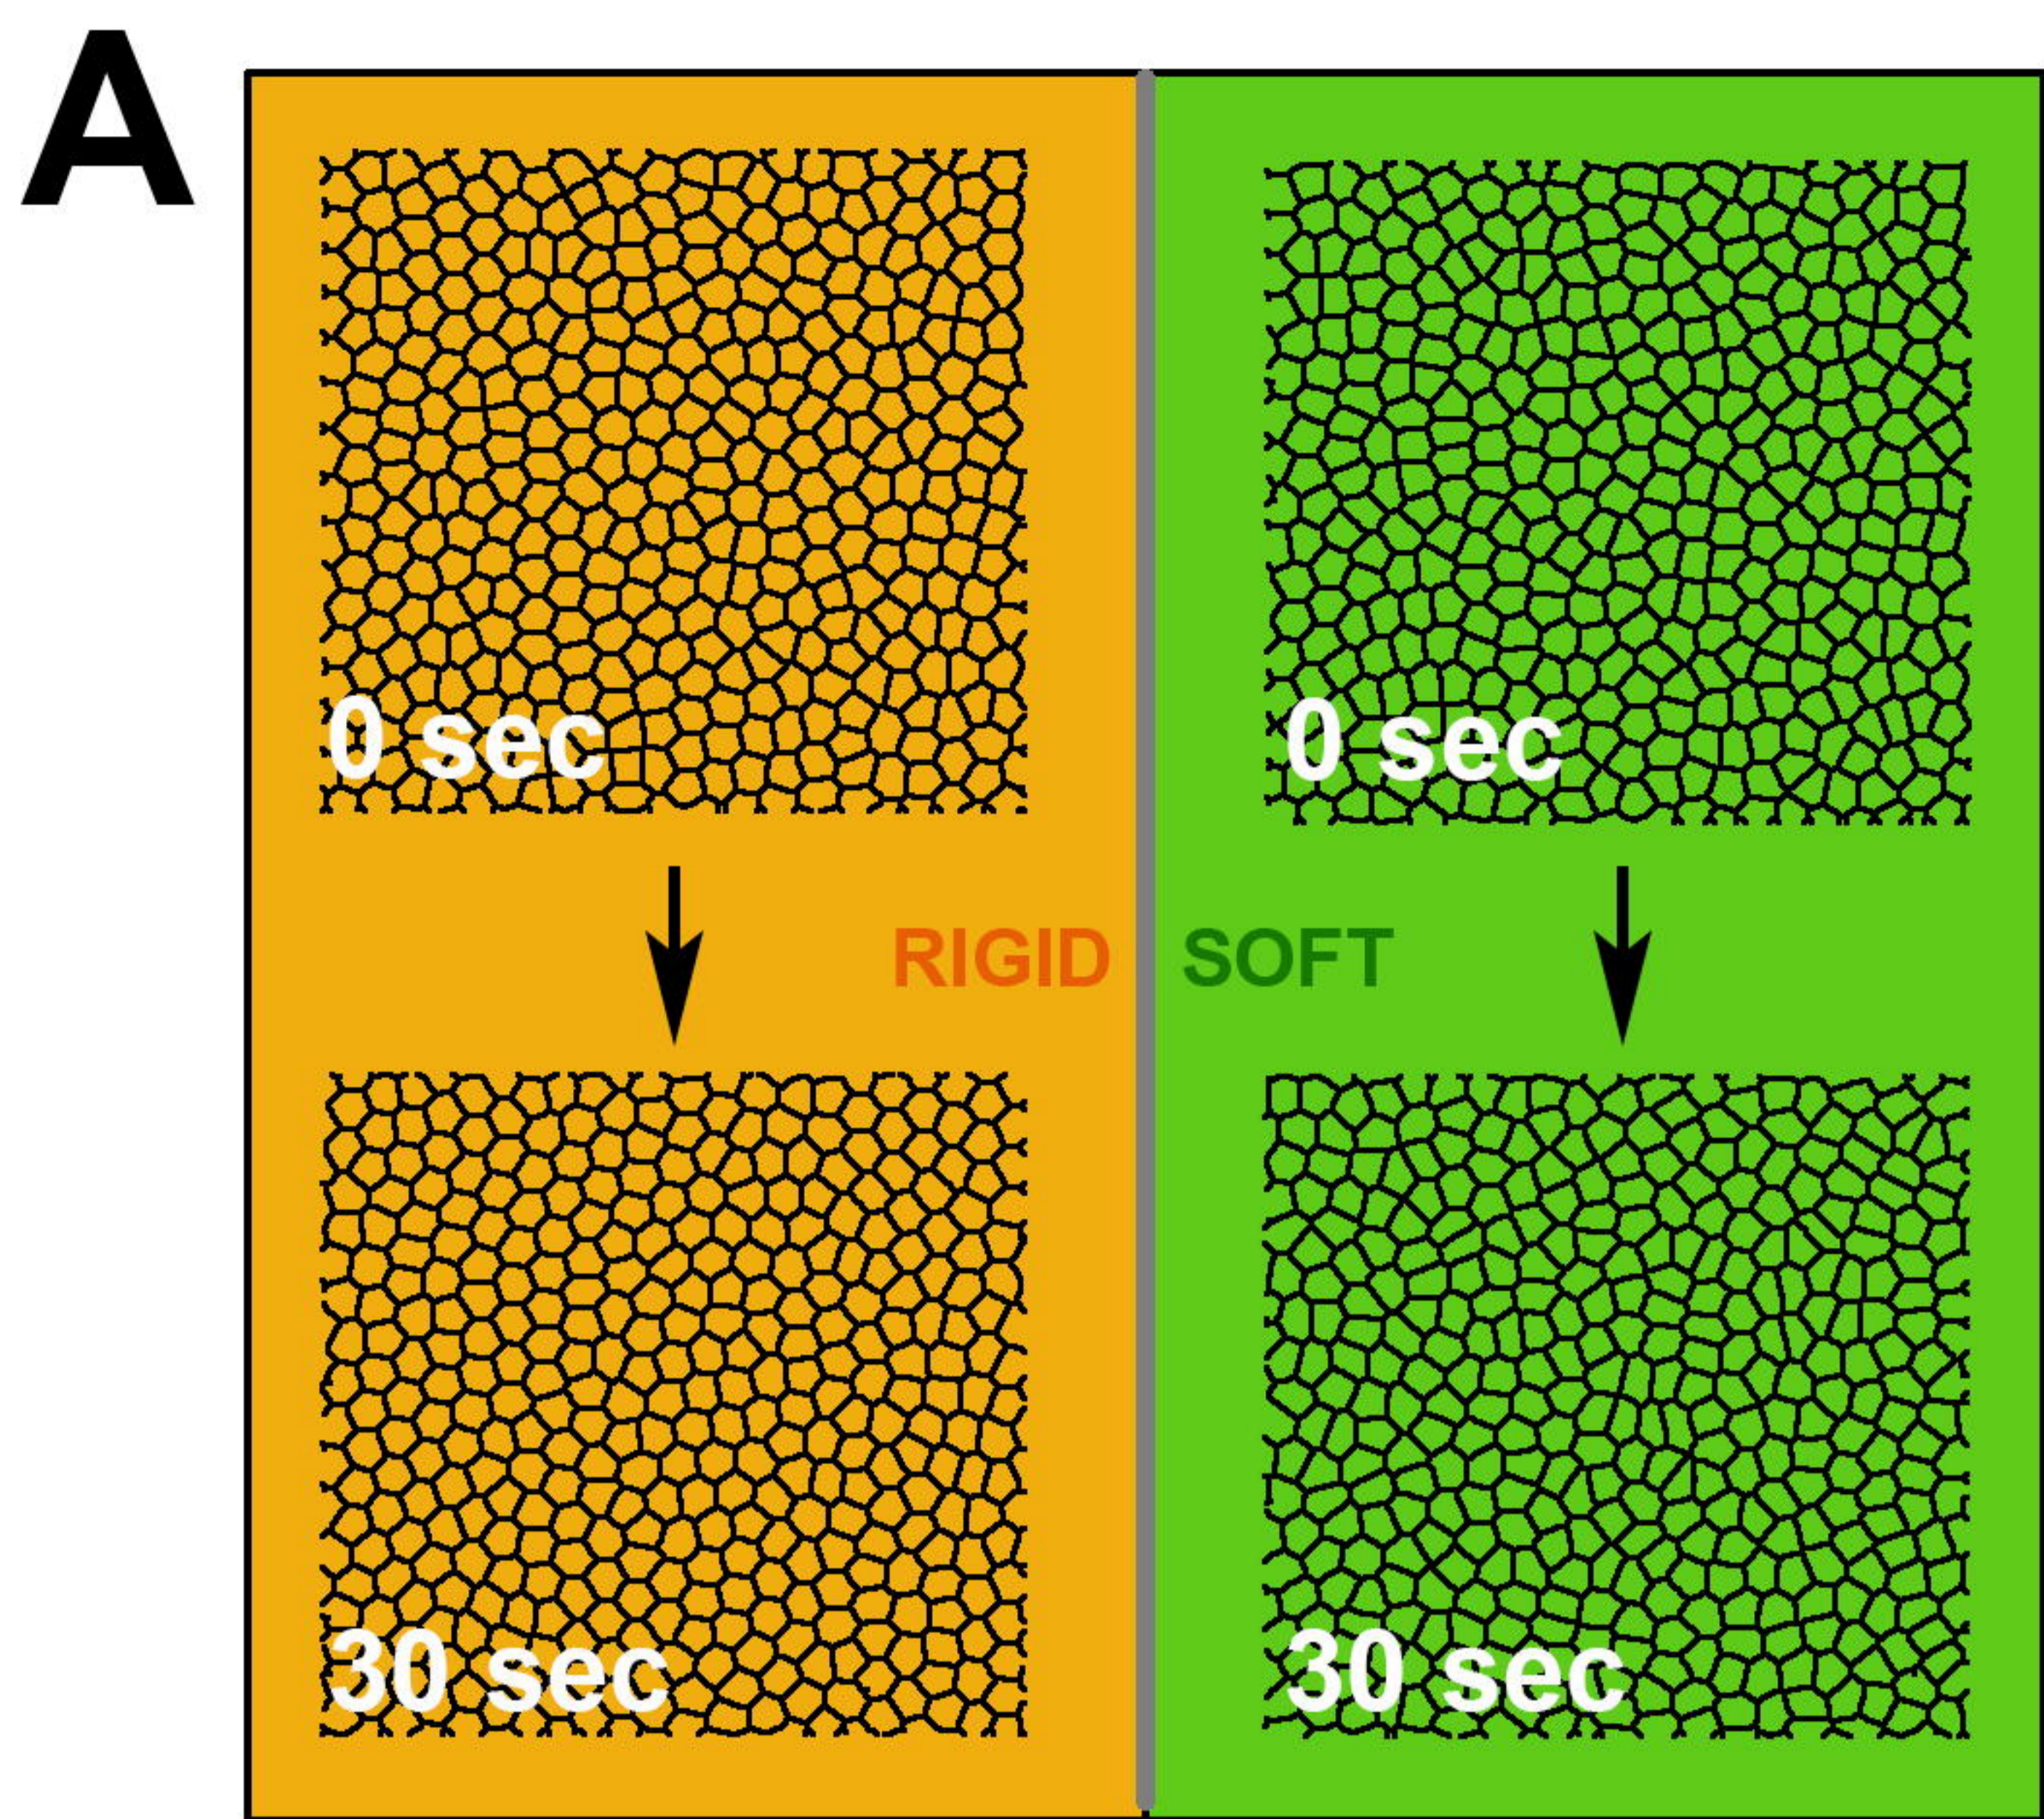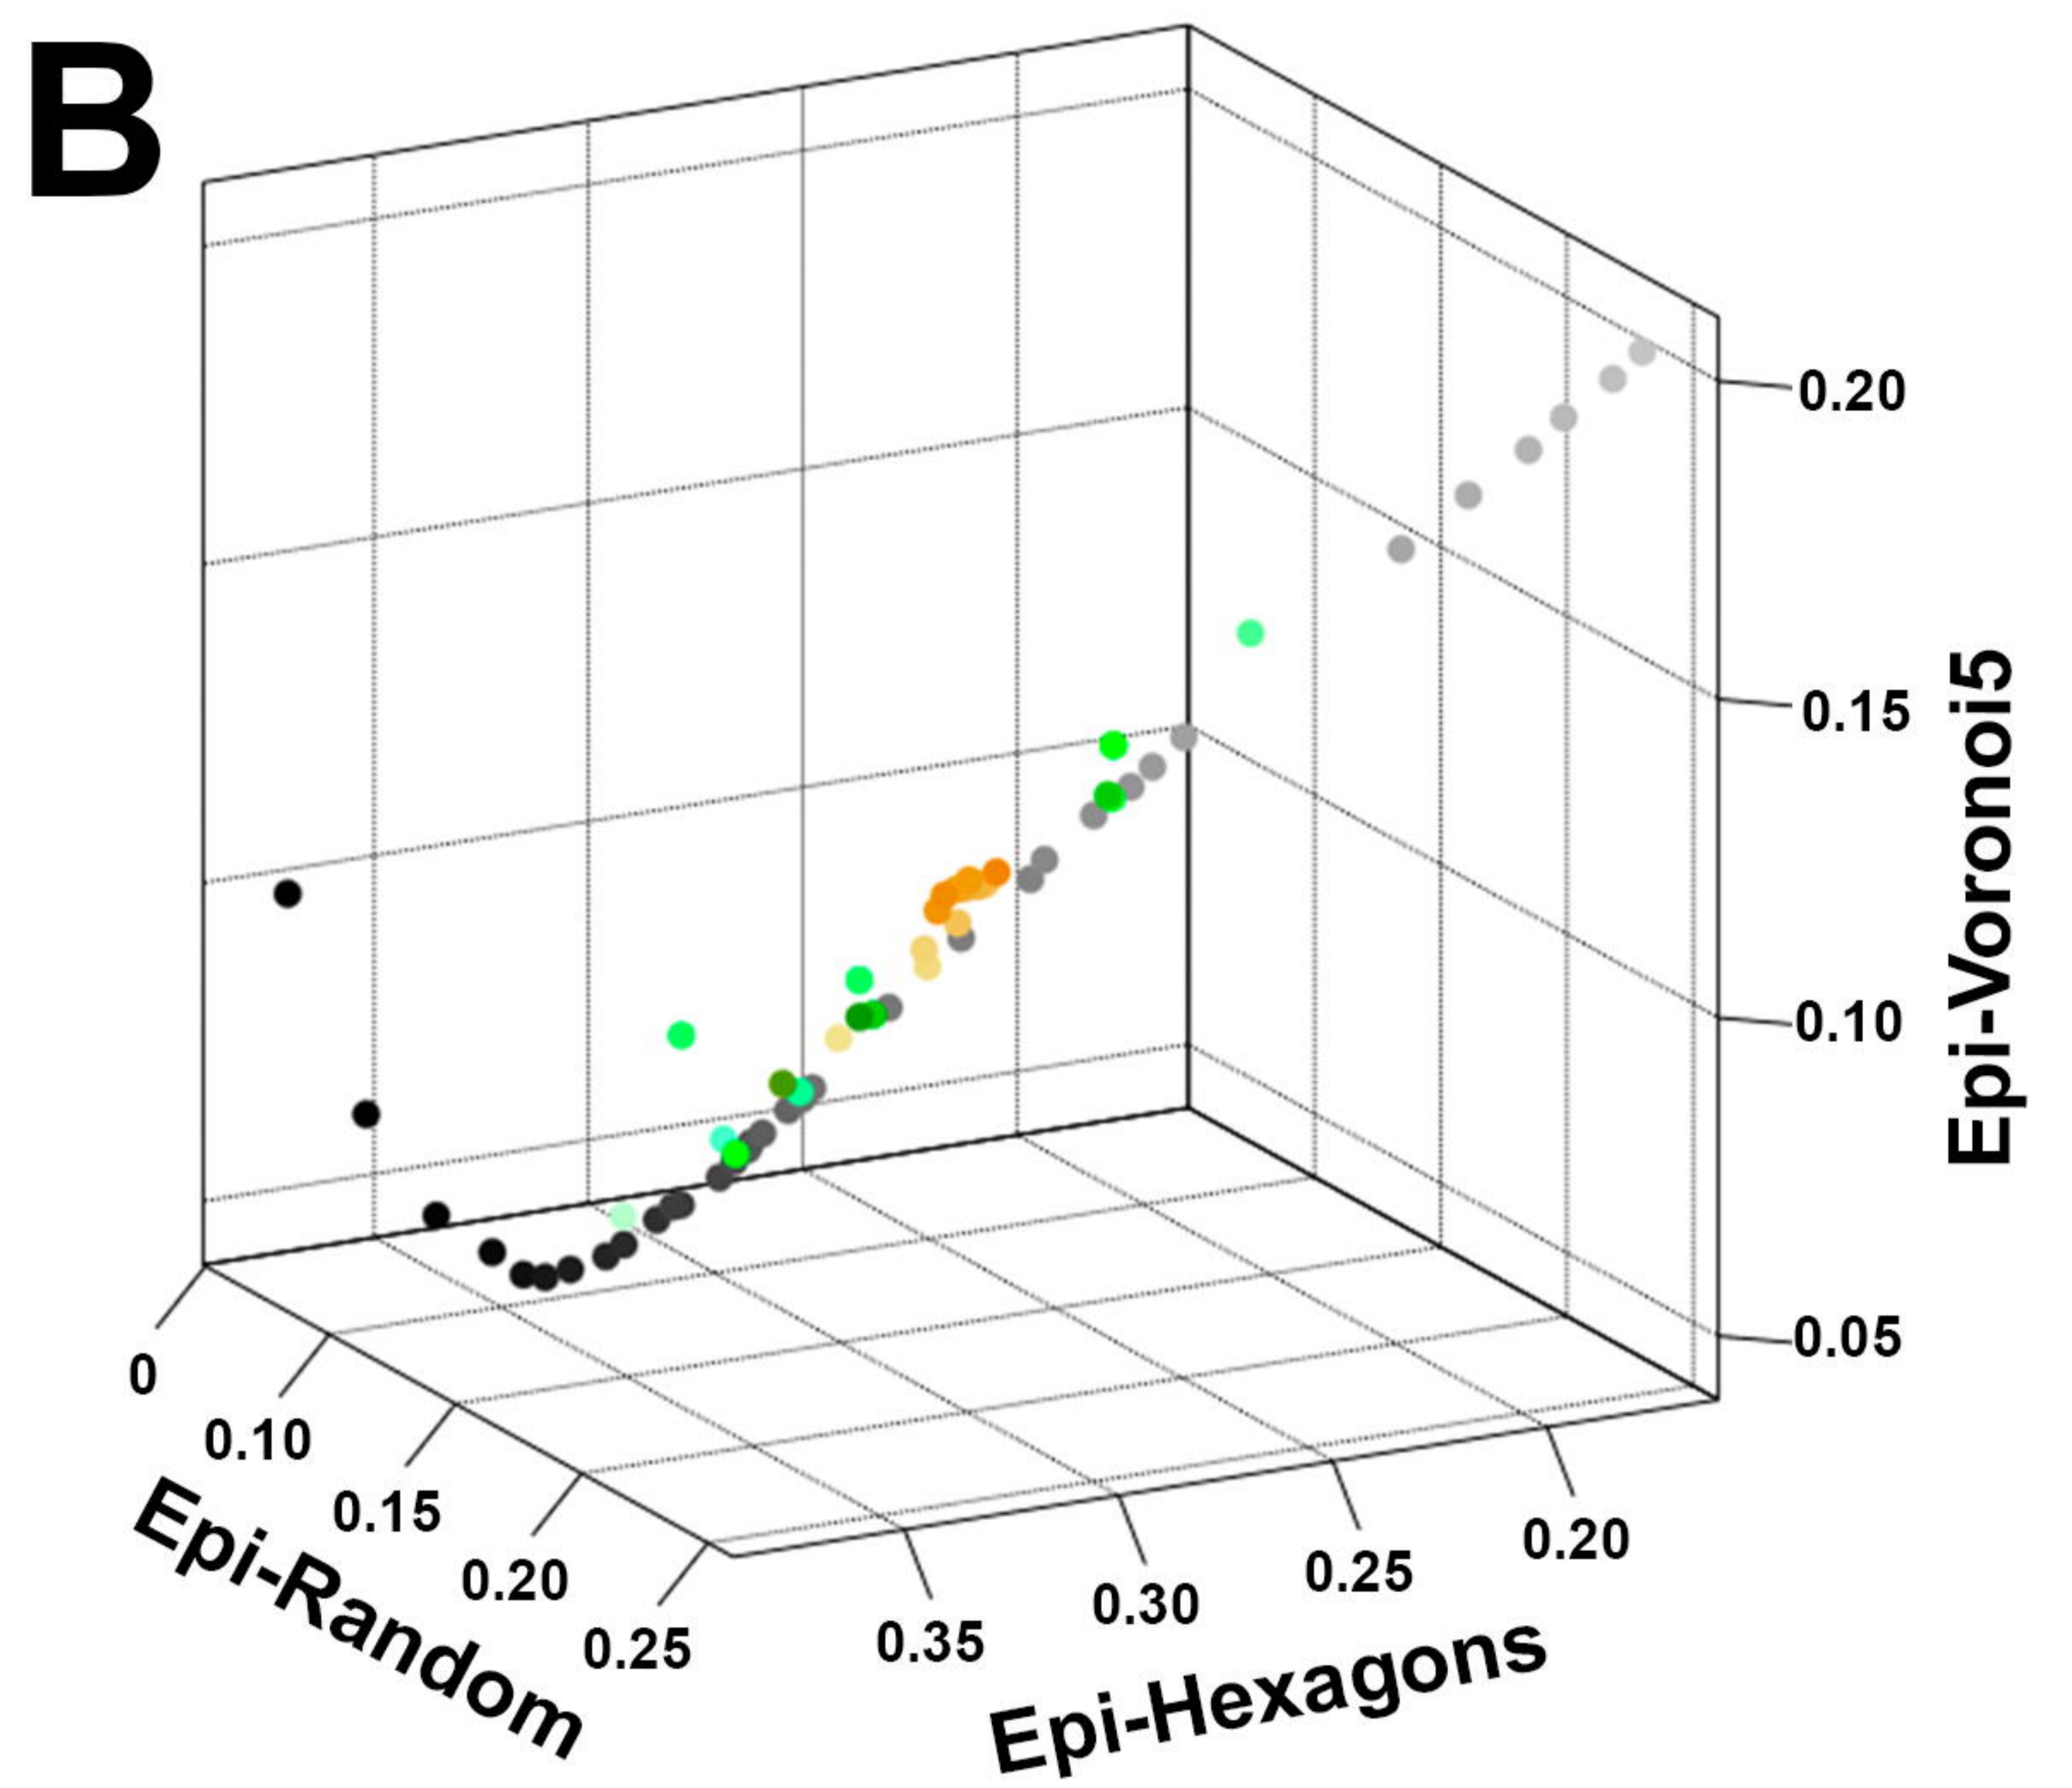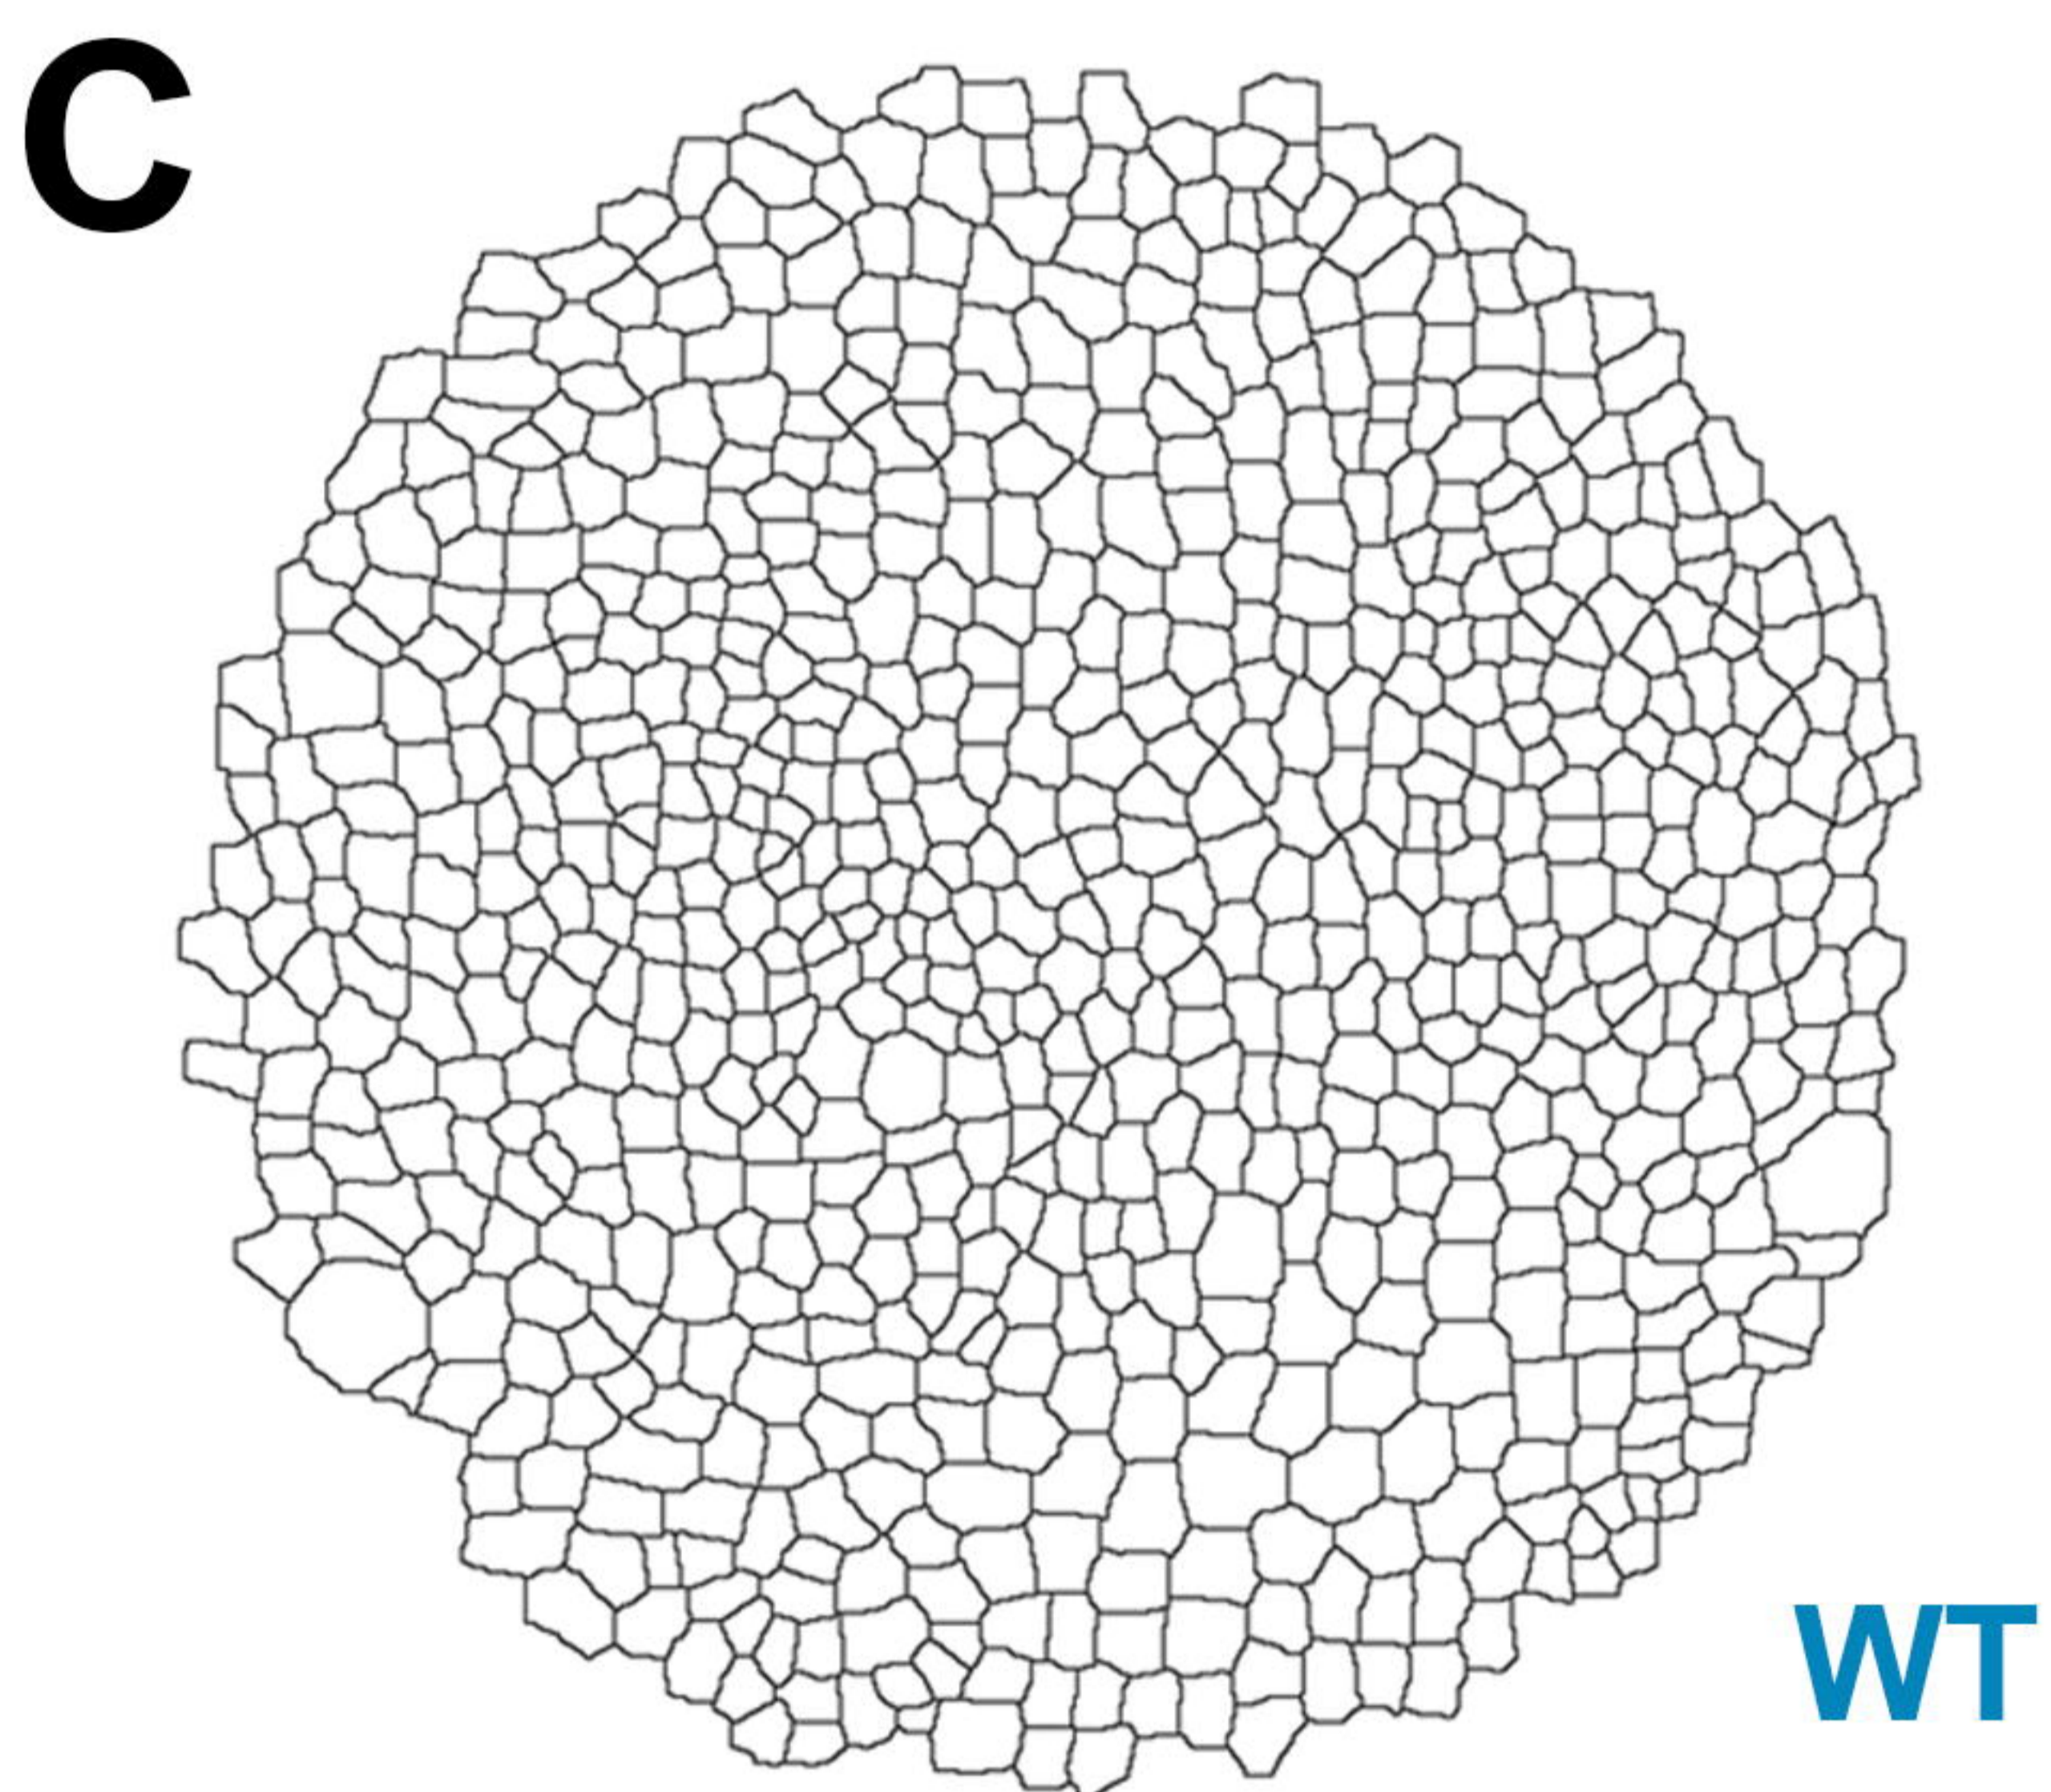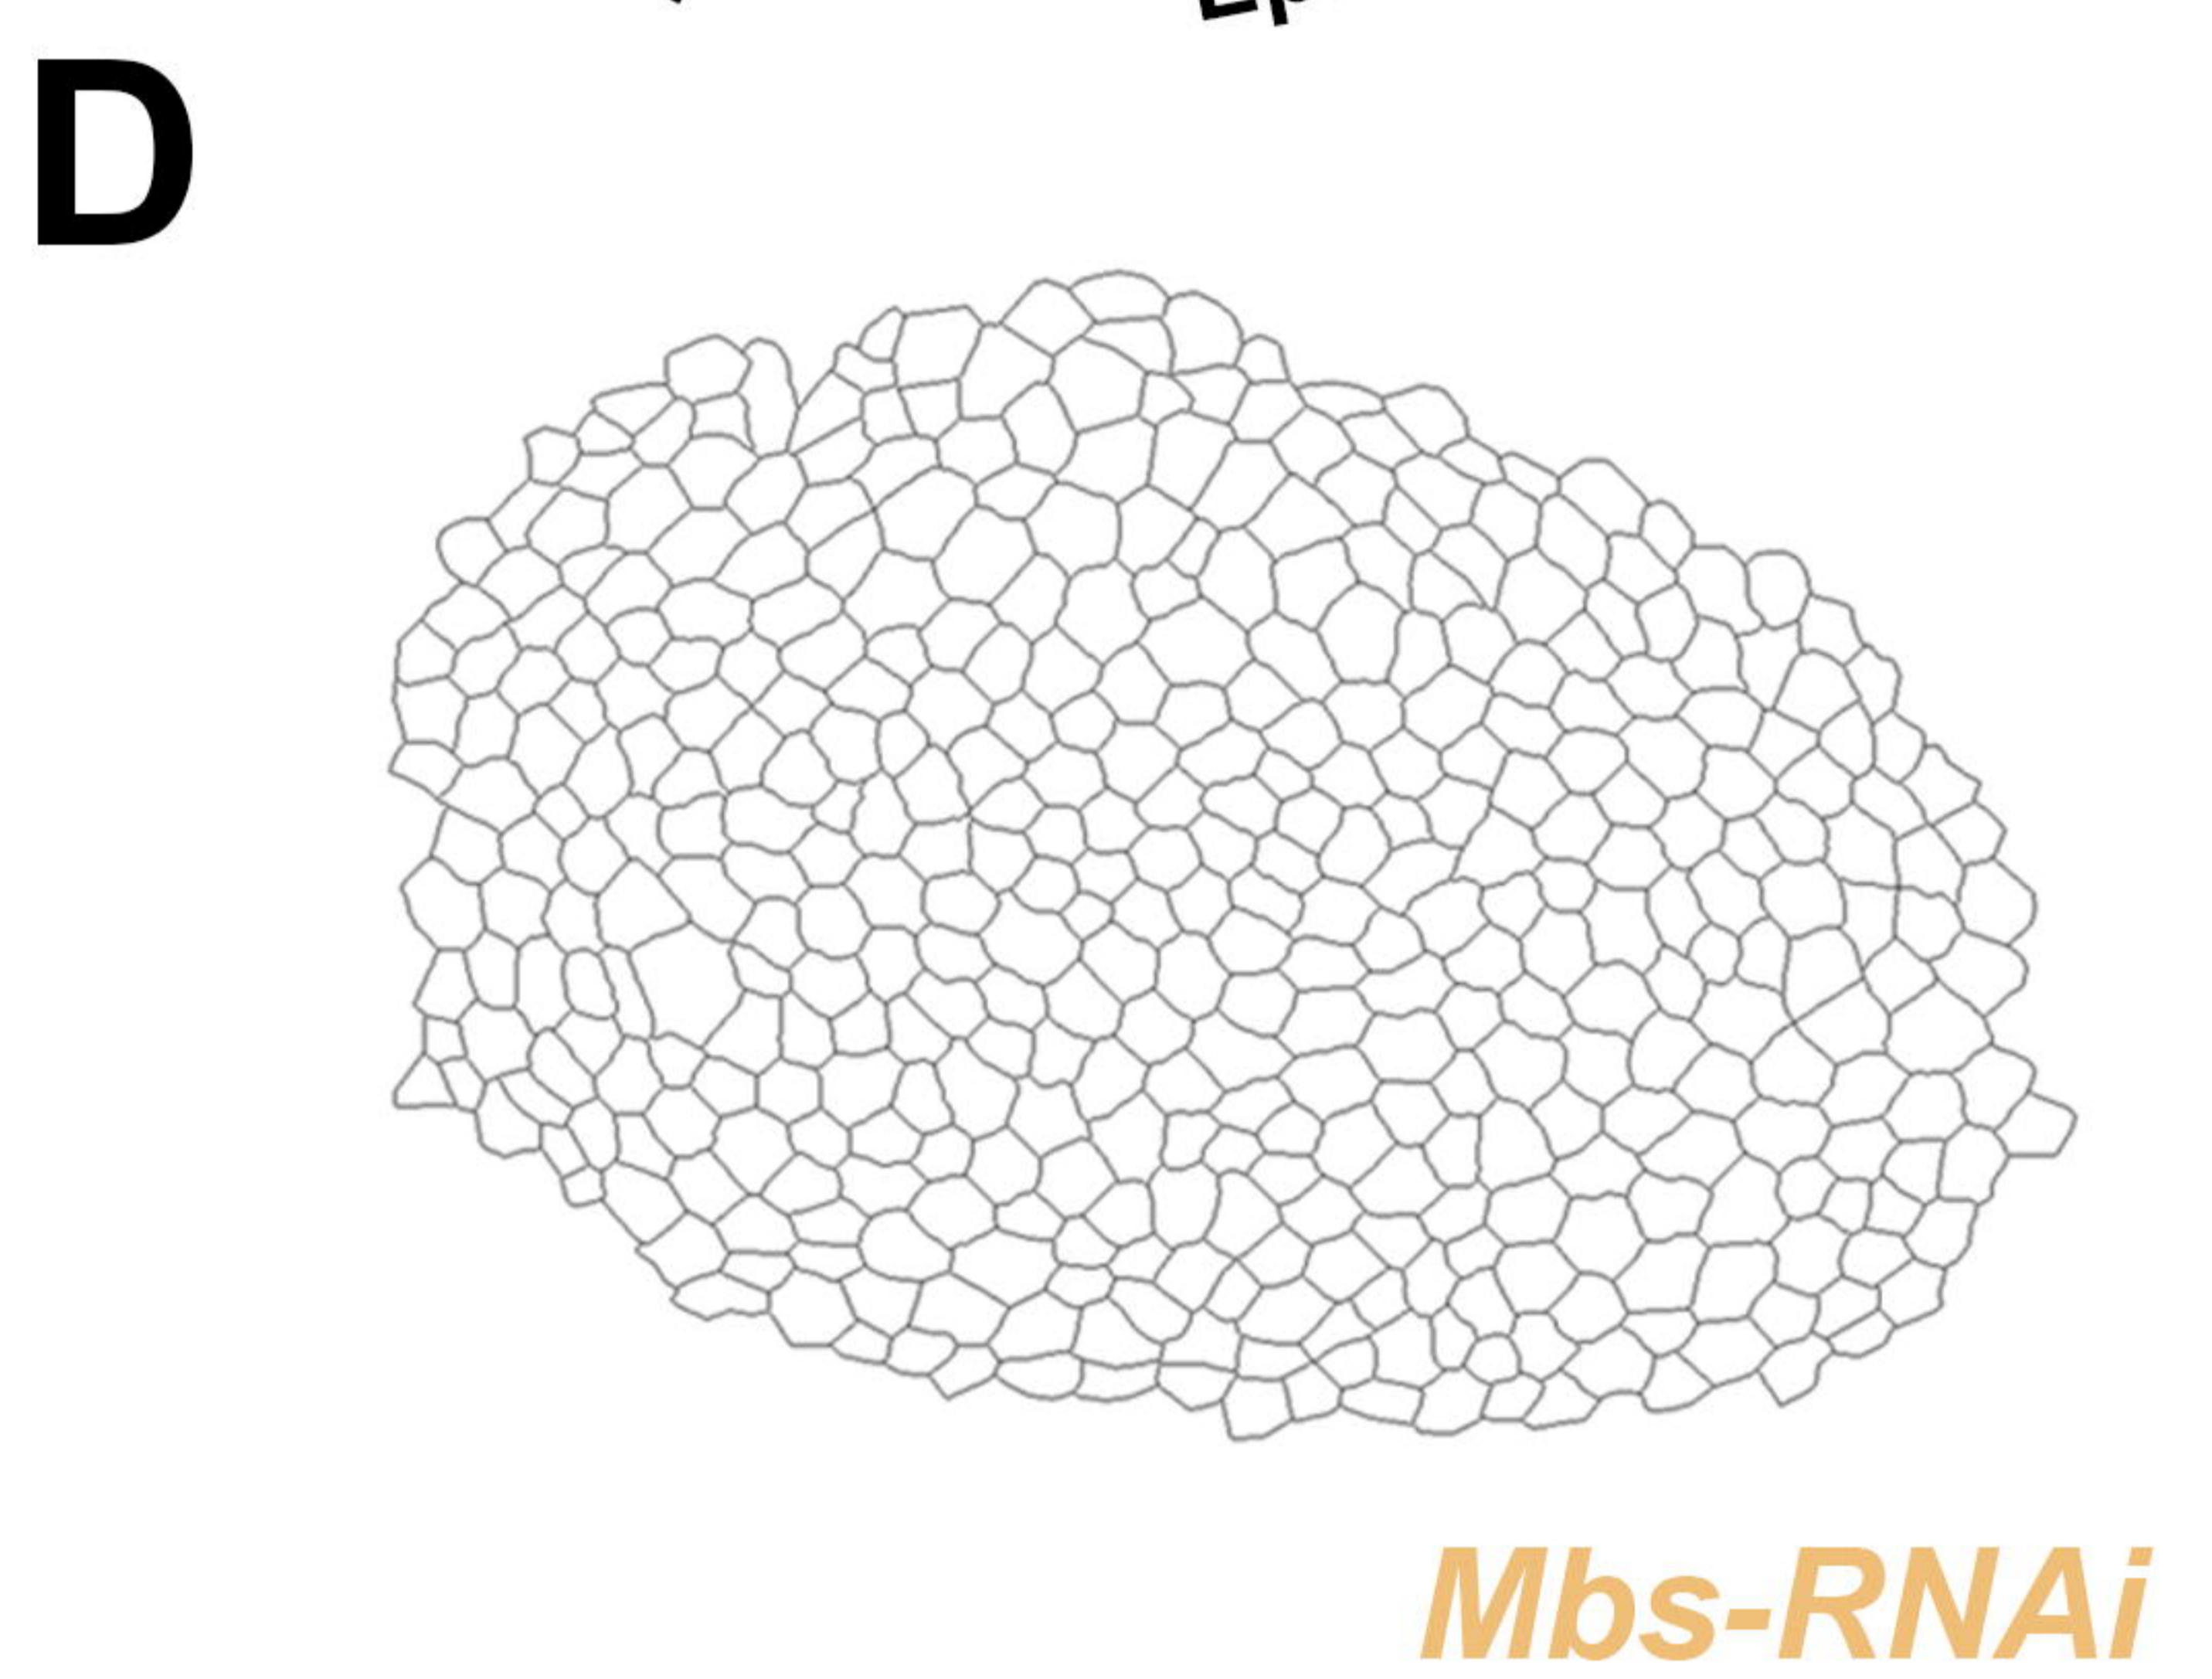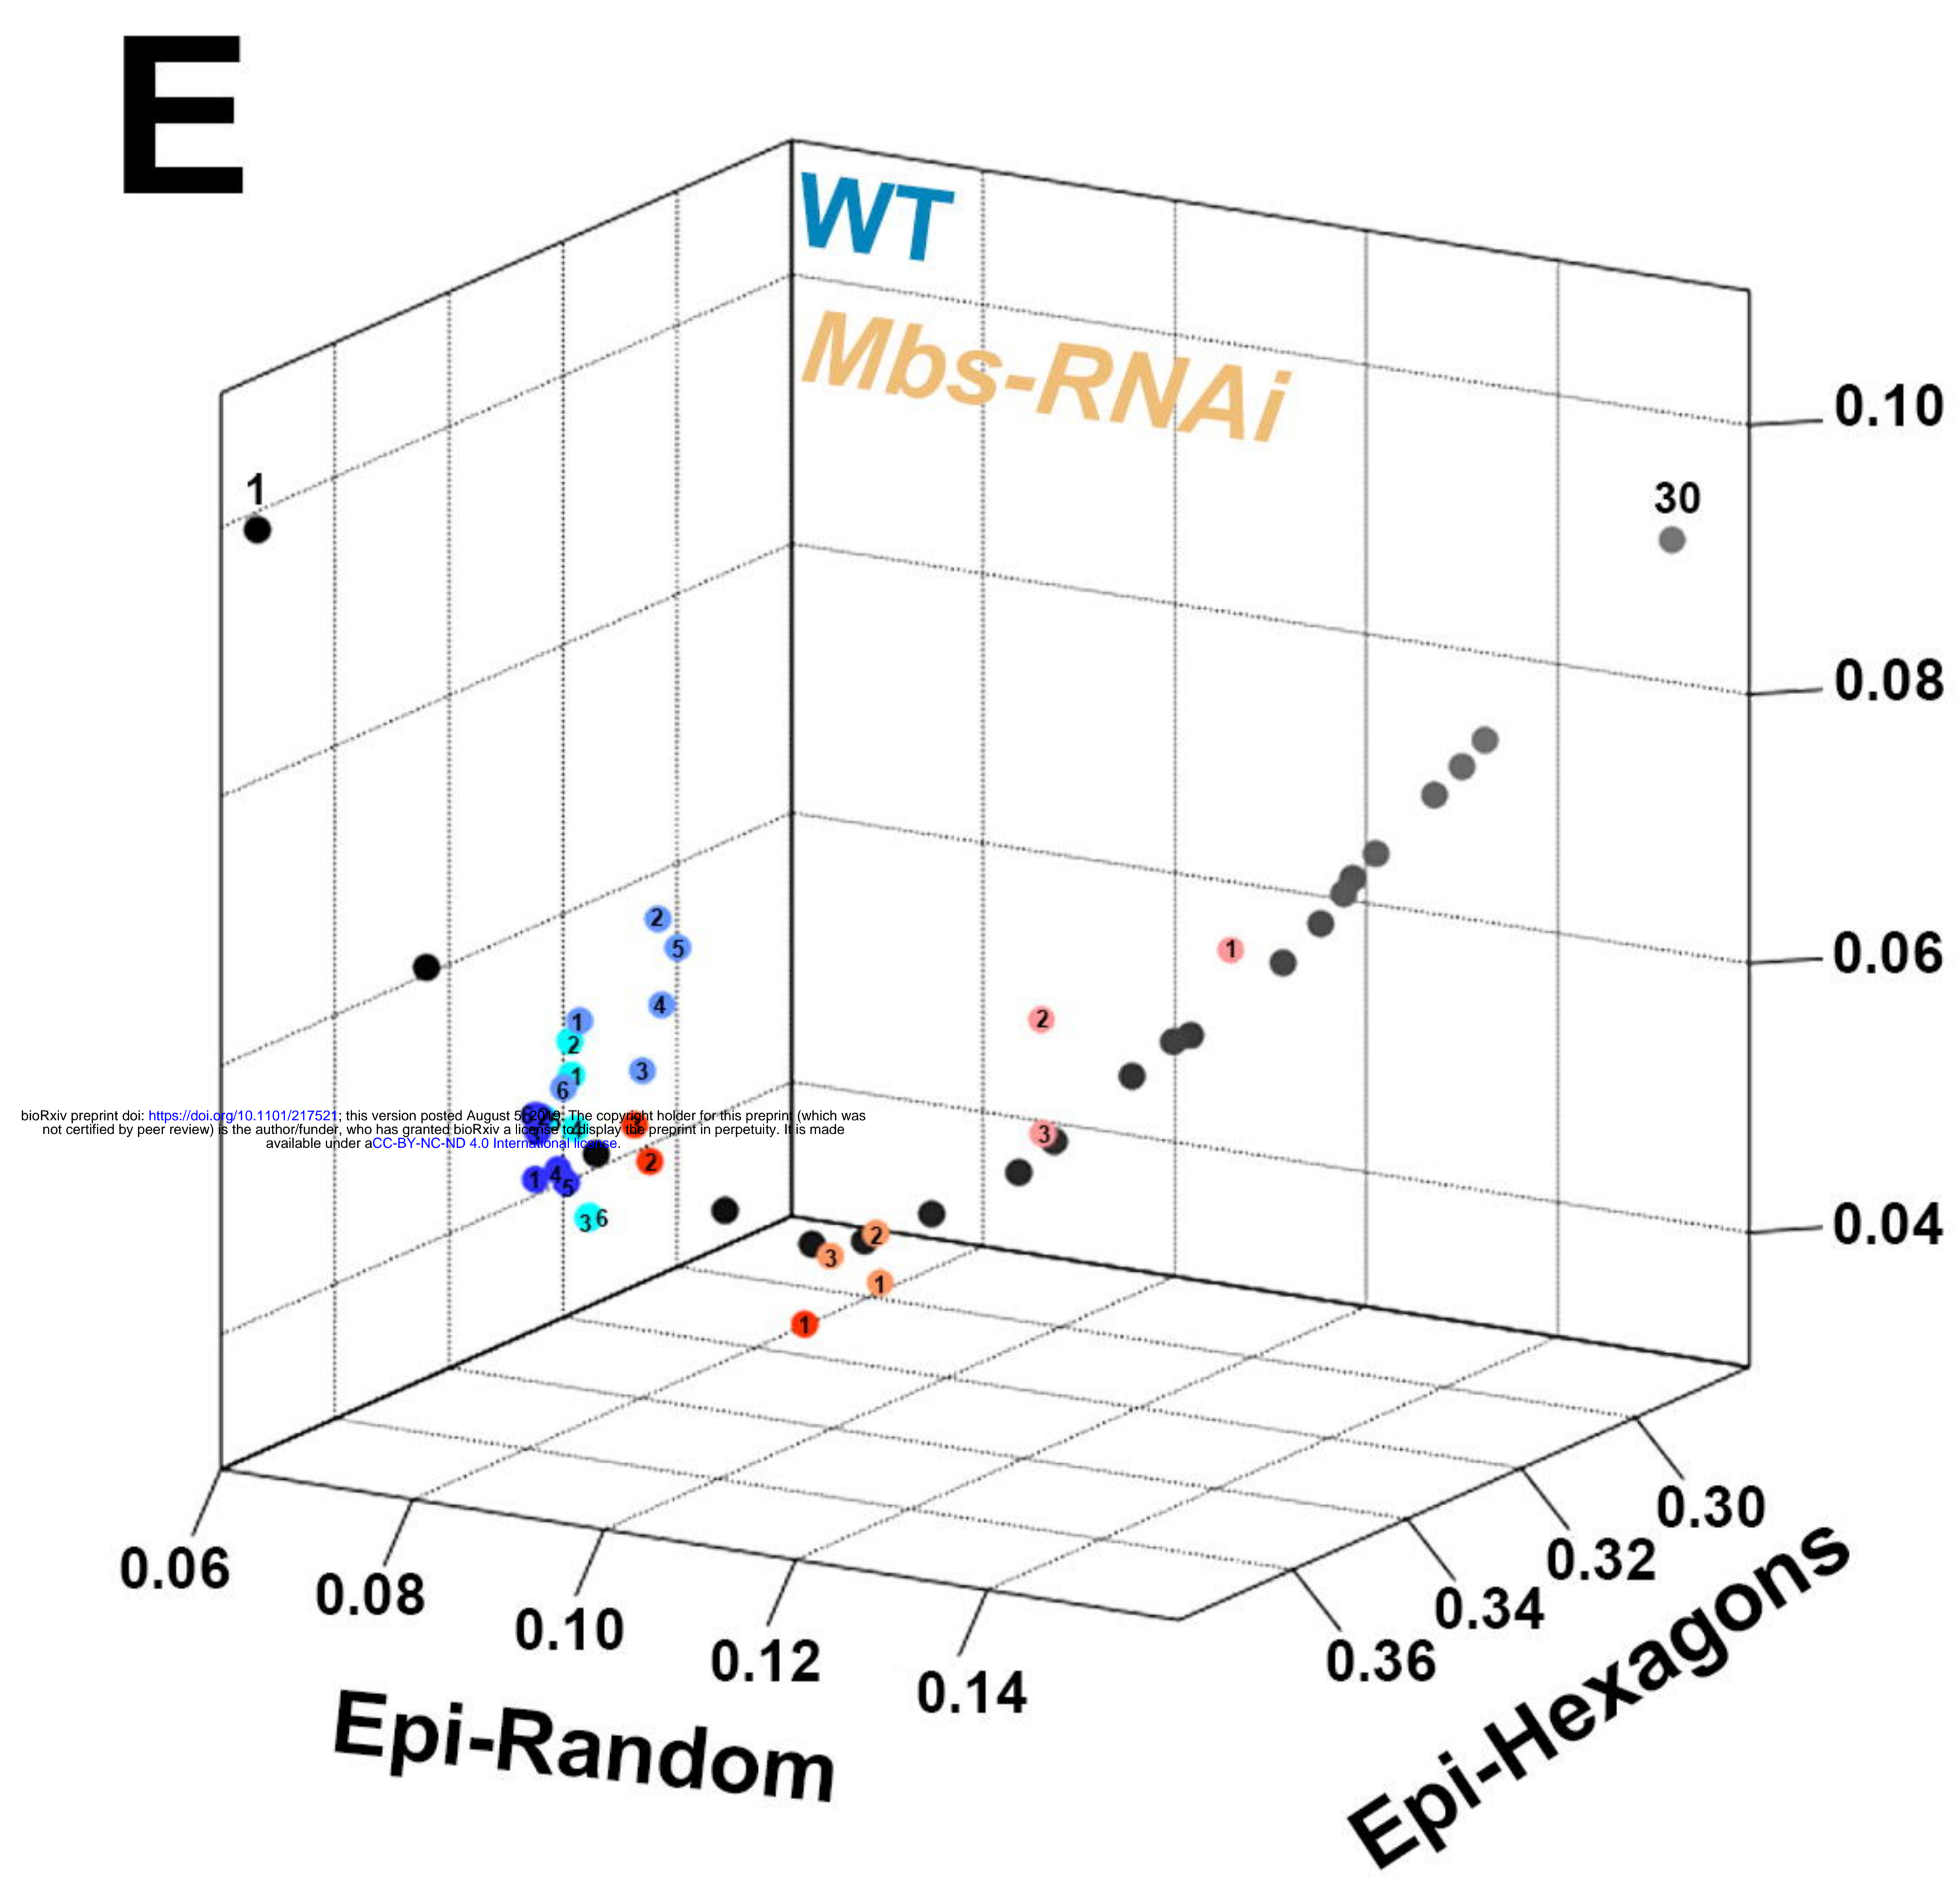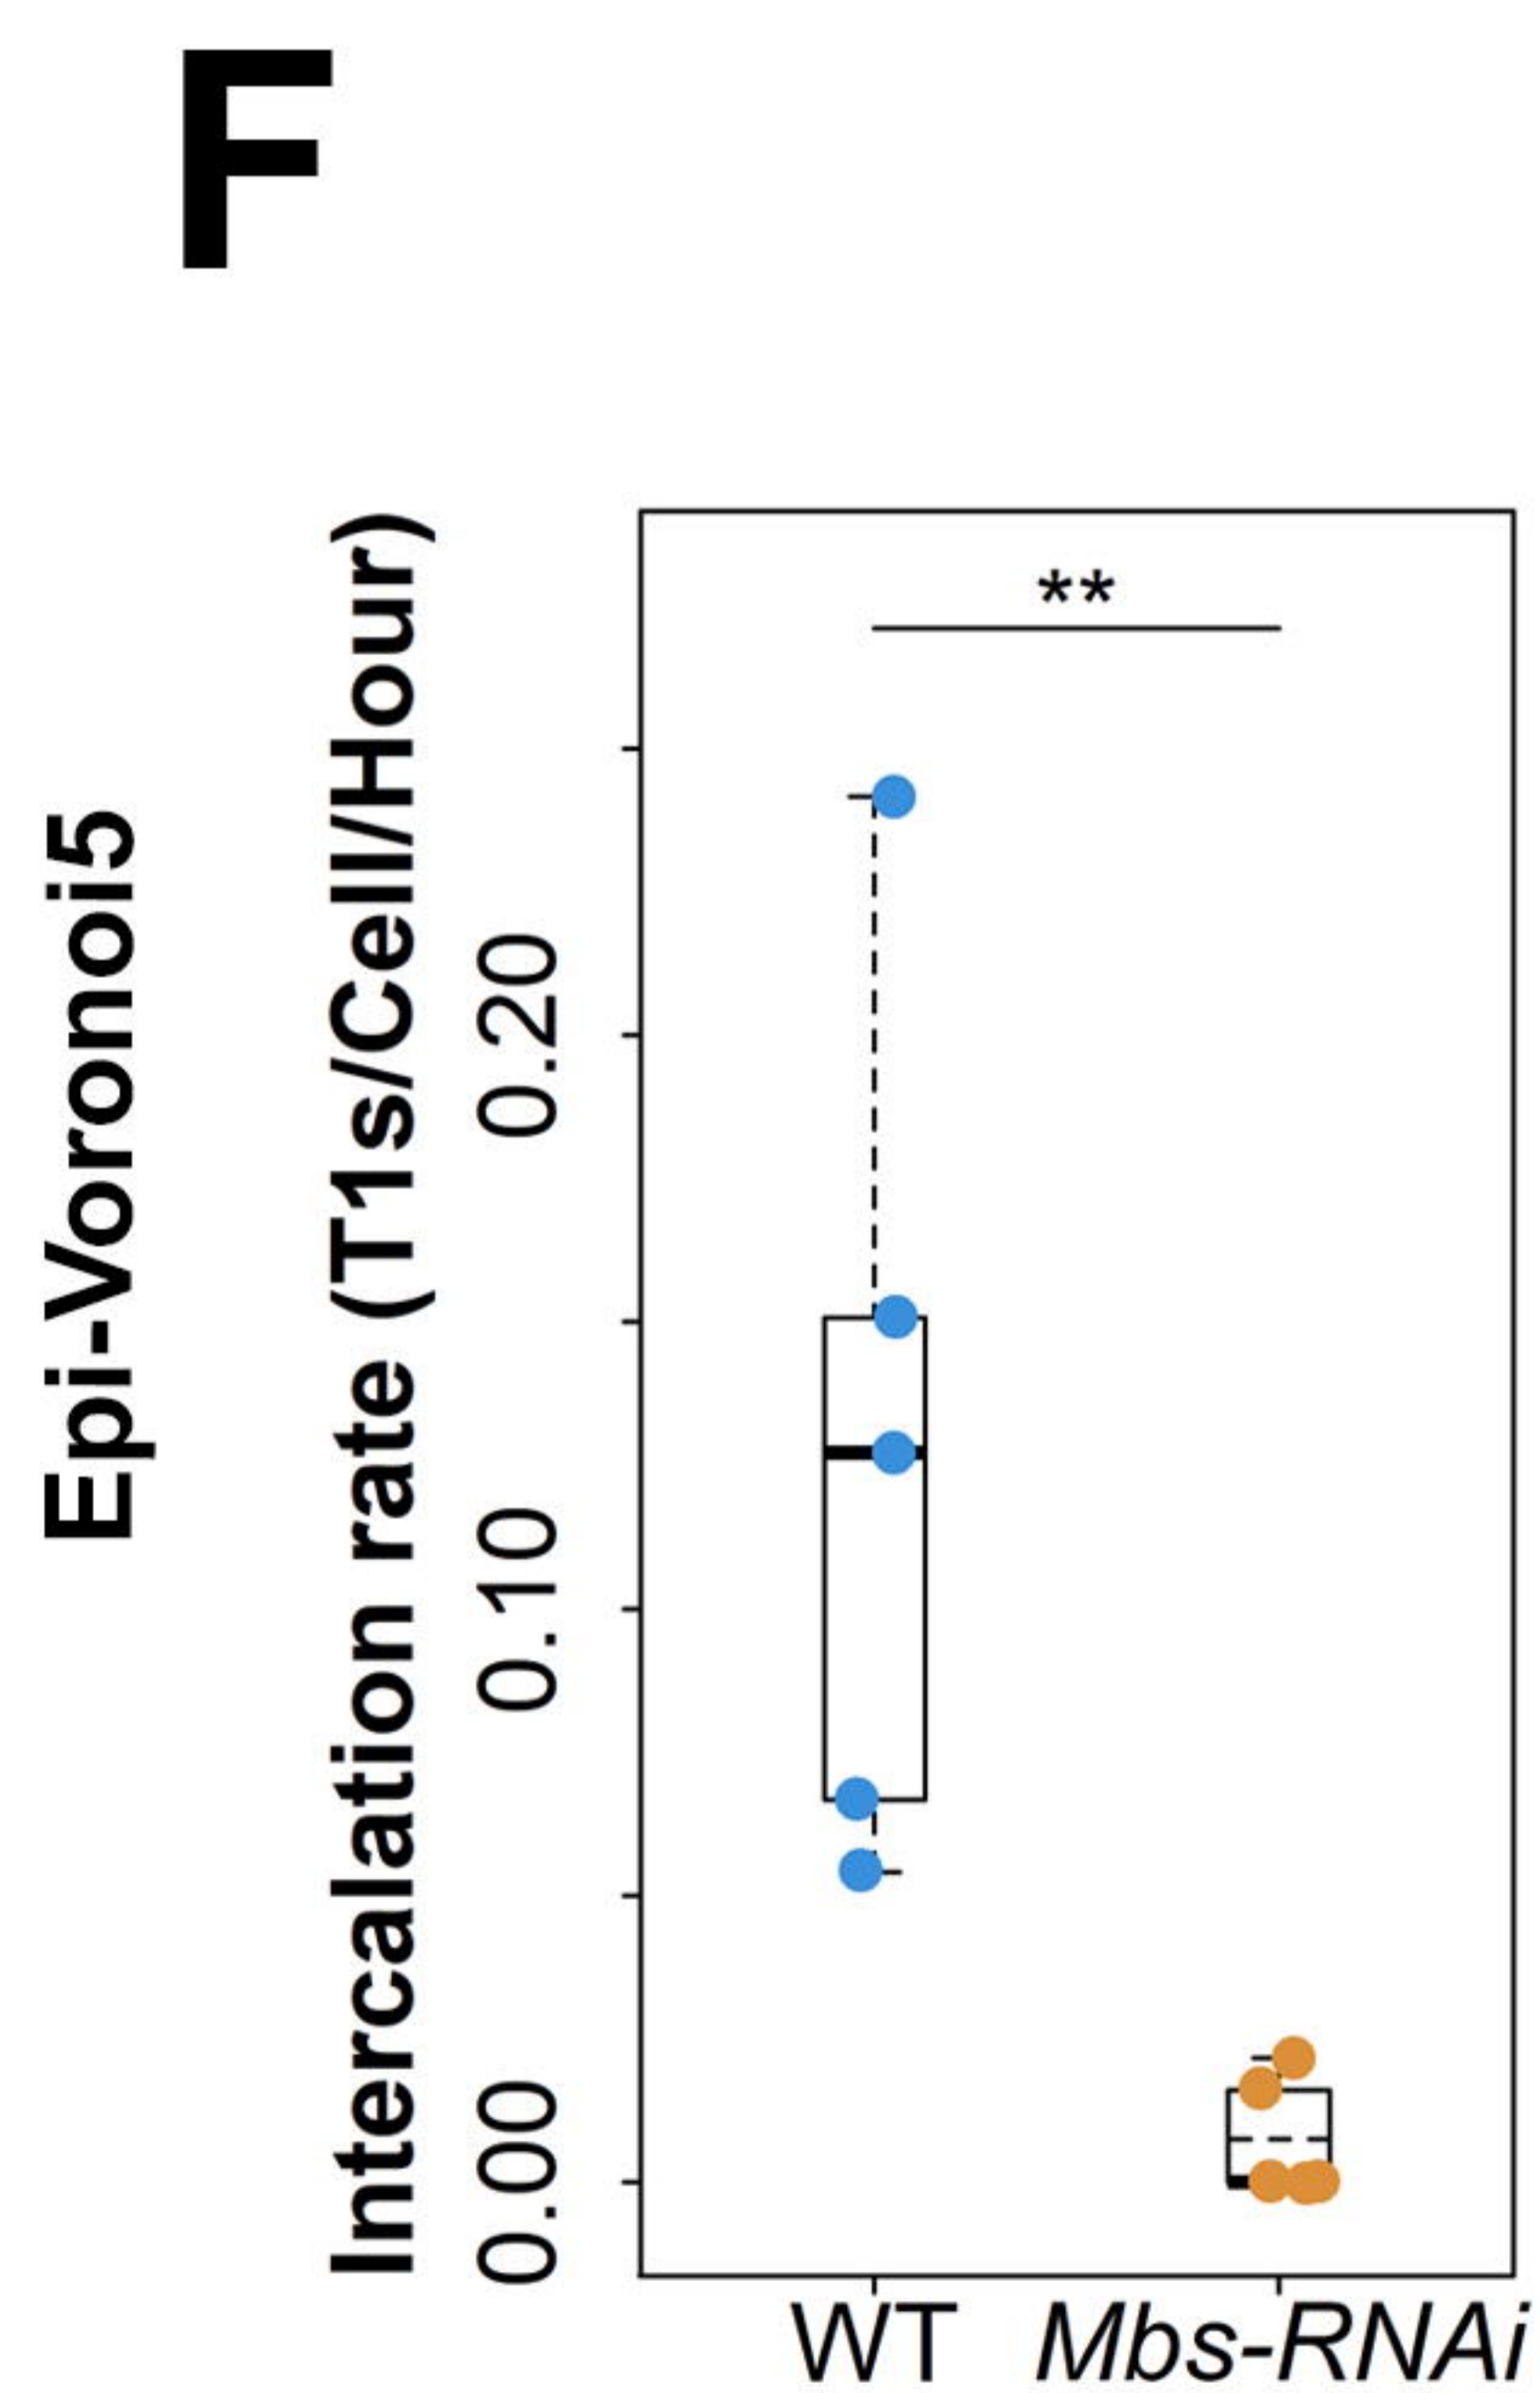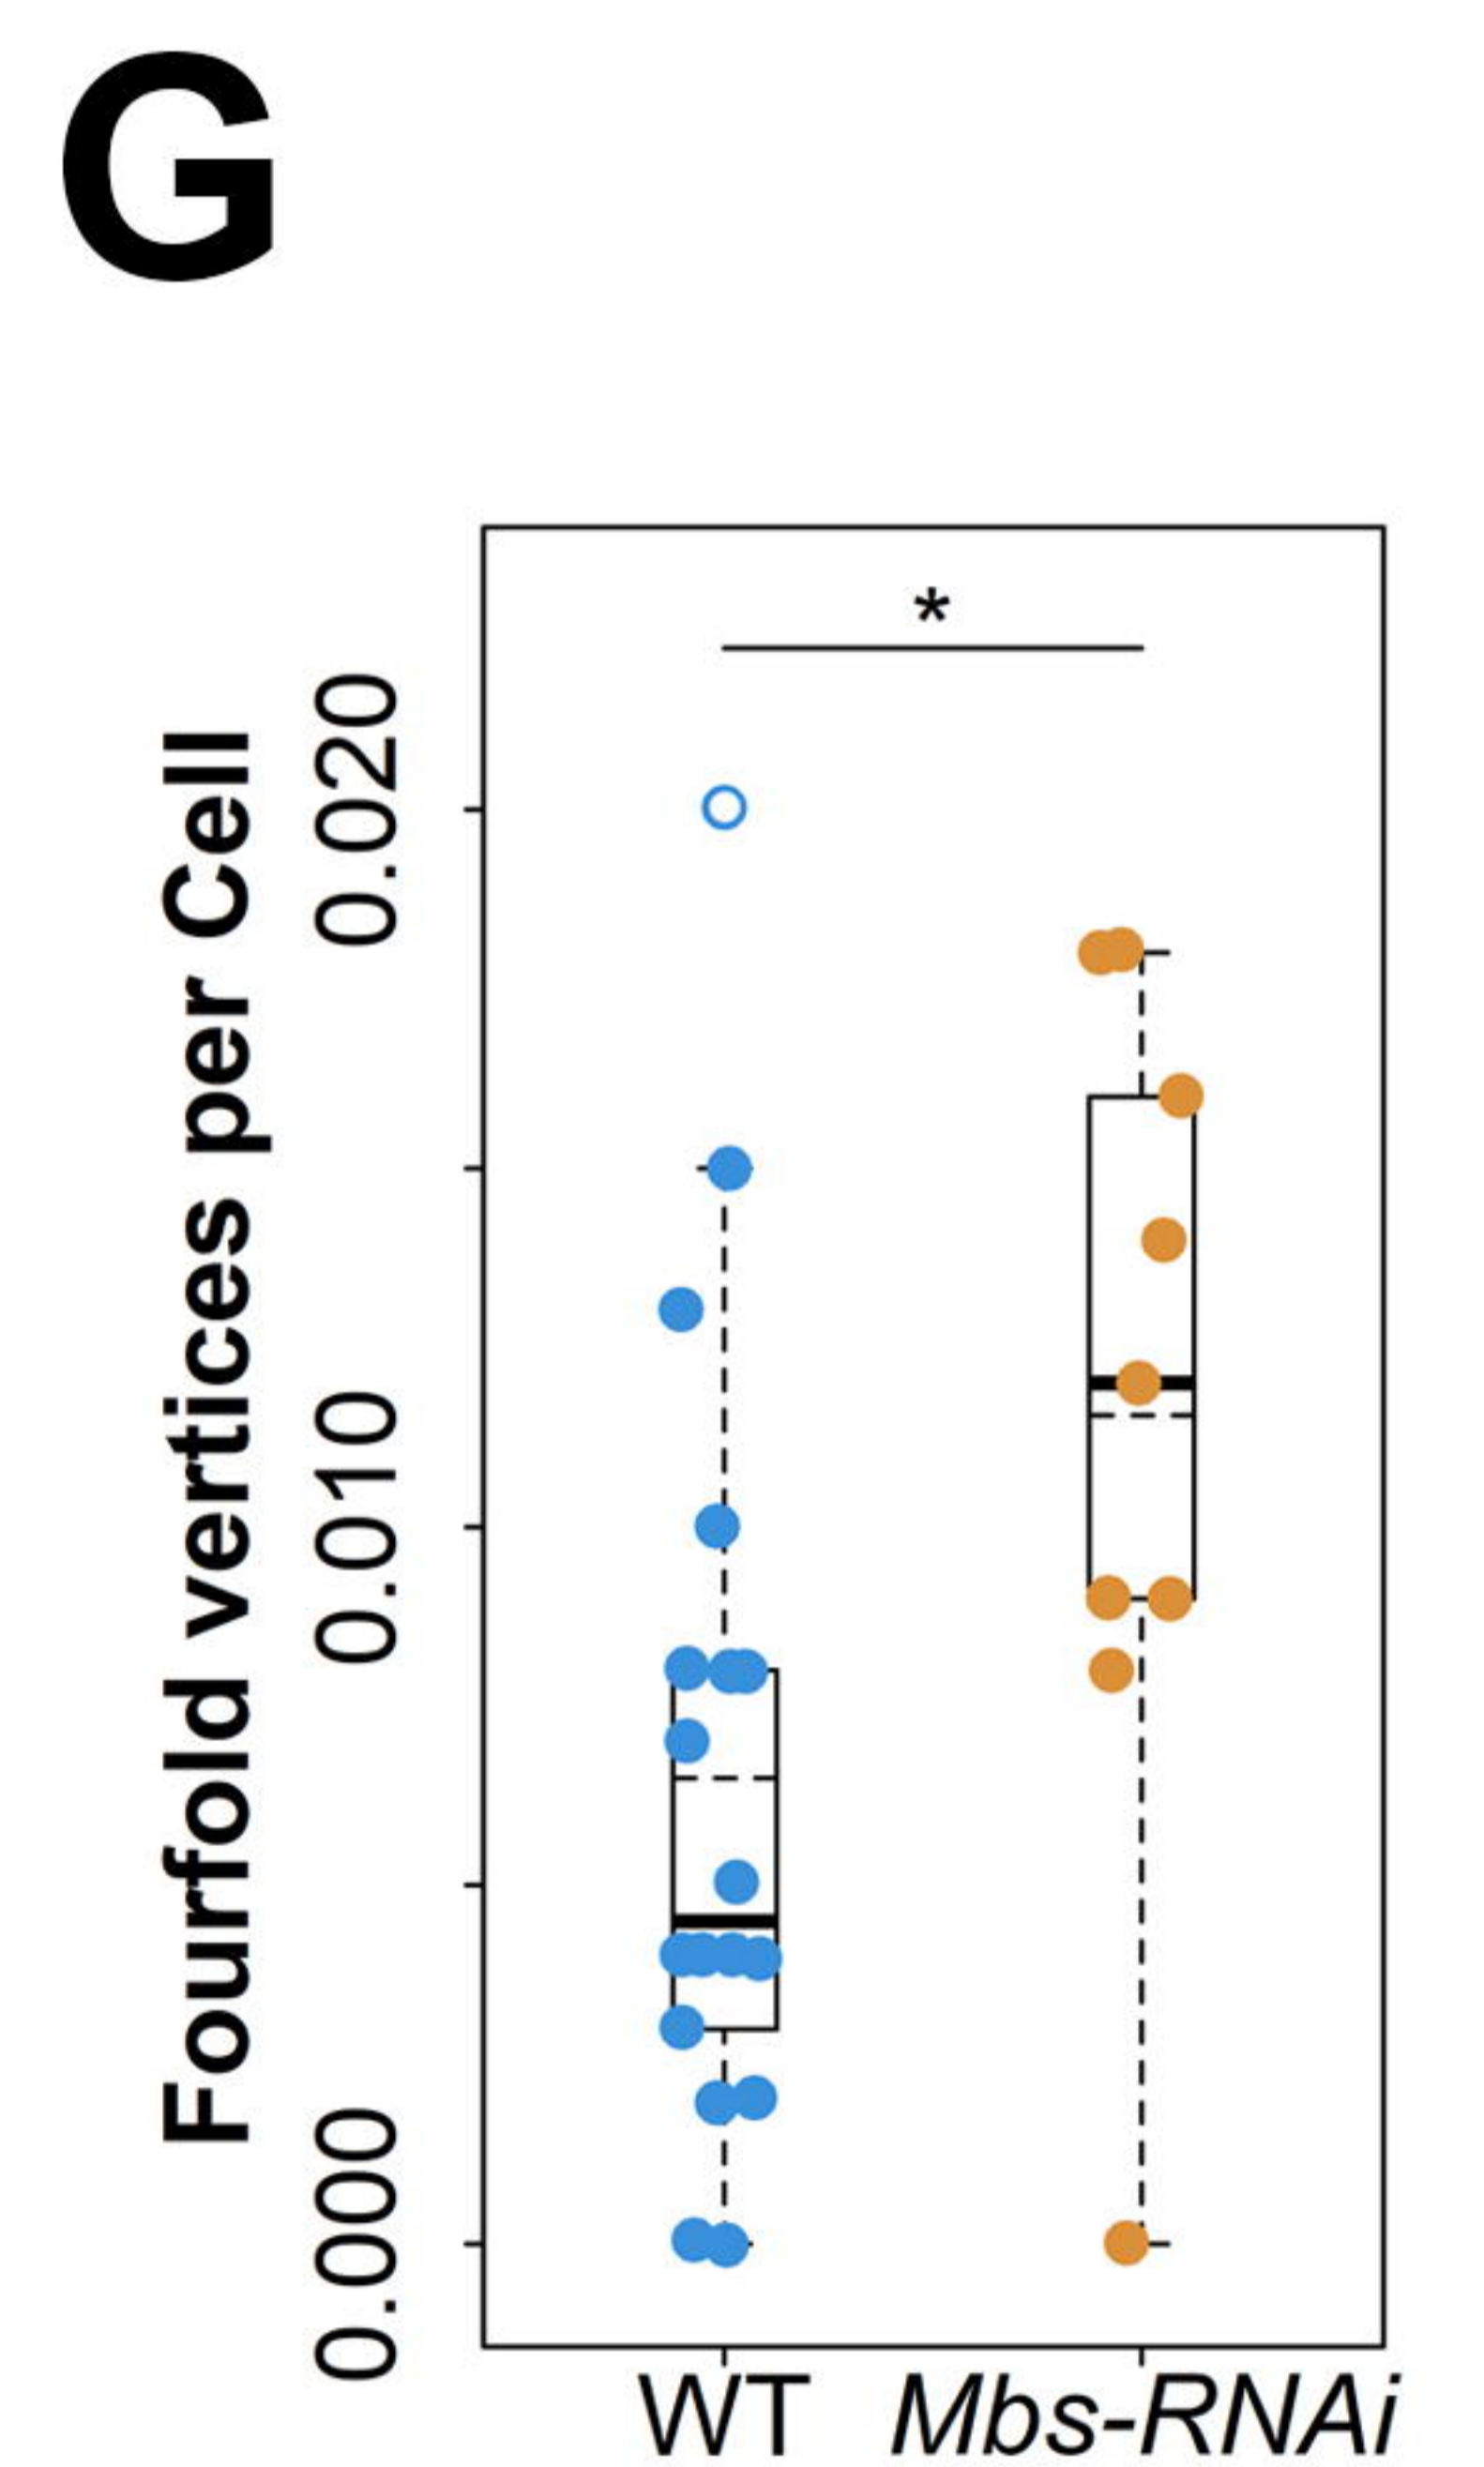

Source: https://www.biorxiv.org/content/10.1101/217521v6.full.pdf
