# Supplementary material for: EpiGraph: an open-source platform to quantify epithelial organization
Source: bioRxiv or medRxiv preprint supplement (doi:10.1101/217521), 2019-08-05
Supplement: Supplementary file [file 217521-1.pdf]

# 1 EpiGraph: an open-source platform to quantify 2 epithelial organization.

## 3 4 Supplemental Information.

### 5 6 SUPPLEMENTAL EXPERIMENTAL PROCEDURES

#### 7 EpiGraph Source code.

8 The project's code is accessible through Github  
9 <https://github.com/ComplexOrganizationOfLivingMatter/Epigraph>. It is open  
10 source and available under GPLv3 license.

#### 11 Pipeline.

12 The image processing pipeline entails cells recognition, valid cells  
13 identification, graph of cell-cell contact creation, polygon distribution analysis  
14 and, finally, GDDH, GDDRv and GDDV5 calculation. These stages are properly  
15 described on the subsequent paragraphs.

#### 16 - Recognition of existing cells

17 EpiGraph uses as input segmented images from natural tissues or  
18 simulations. These images must be built in binary format, where one colour  
19 should be presented as the background, forming the body of cells, and the other  
20 one the cells outline. Each cell gets assigned a label using MorphoLibJ  
21 (Legland et al., 2016). This identifier will allow us to have a record of every cell  
22 and his location on the image that it will be necessary for the following steps.

#### 23 - Valid cells identification

24 Once we have properly labelled the image, we proceeded to fully analyse it.  
25 By default, an invalid region is created. This region is initially defined by the  
26 boundaries of the image itself. We got all the cells that fall into these borders  
27 and set them as no valid cells. In this way, we avoid an incorrect  
28 characterization of polygon distribution due to the lack of real neighbours in the

1 margins of the image. However, you can add a personalized invalid region  
2 selecting as many cells as you want.

3 In addition, we define another two kinds of valid cells: the 4' valid cells and the  
4 5' valid cells. The former represents the cells that do not have a not valid cell  
5 within a distance of four cells connexions. The later kind is formed by the cells  
6 having all valid cells in a maximum length of five cells connexions. Mo7 and  
7 Mo10 require 4' valid cells and Mo17 and Mo29 5' valid cells.

#### 8 - Neighbourhood creation

9 An epithelium can also be seen as a tessellation because there's no space  
10 between each cell. Thus, inspecting the number of sides of the cells we can  
11 measure the number of neighbours that will surround it. We, therefore, extend a  
12 mask from each pixel of the cell with a given shape and size, both selected by  
13 the user. Then, we capture all the cells distinct from the actual cell that fall into  
14 this mask and add them as neighbours of the concrete cell. Afterwards, we  
15 create a neighbourhood network, modeling each cell as a node and connecting  
16 two cells with an edge, if they are neighbours.

#### 17 - Polygon distribution analysis

18 The polygon distribution is defined by the number of sides of every valid cell.  
19 We specify three different areas: the global zone formed by all valid cells, the  
20 region in which 4' valid cells are contained and the territory in which 5' valid  
21 cells are placed. For Mo7 and Mo10, we use a path of length 4 (4' valid cells as  
22 orbits nodes, and valid cells as its branching nodes), and for Mo17 and Mo29  
23 the area is defined by the cells contained within the path of length 5 (5' valid  
24 cells as orbits nodes, and valid cells as its branching nodes). Finally, we  
25 calculate the polygon distribution regarding the cells involved in the graphlet  
26 calculation.

#### 27 - GDDH, GDDRv and GDDV5 calculation

28 We have adapted Graphlet degree Distribution agreement Distance (GDD)  
29 from Yaveroğlu et al. (Yaveroğlu et al., 2014) to fully integrate it with FIJI java  
30 environment. We use GDD to compare two images getting how similar or  
31 dissimilar they are. In particular, minimum distance value (0) means two images

1 are equal, and maximum distance value (1) specifies that they are very different  
2 in terms of graphlets. We compute all the graphlets in which the valid cells  
3 participate. Then, we use only the graphlets in which 4' or 5' valid cells are  
4 included (depending on the set used). We defined three references to compare  
5 with the real images. The first one is Graphlet degree Distribution agreement  
6 Distance Random Voronoi (GDDRV). A random Voronoi (RV) is generated from  
7 500 random points establishing related Voronoi cells. Then, we computed the  
8 distance between twenty RV images and the real image getting only the mean  
9 of these twenty distances as final reference. We also calculated Graphlet  
10 degree Distribution agreement Distance Hexagons (GDDH), which measure the  
11 different between a given image and a regular tessellation of hexagons, in a  
12 similar way than GDDRV. And, finally, we computed the Graphlet degree  
13 Distribution agreement Distance Voronoi 5 (GDDV5) by comparing a given  
14 image with twenty diagrams 5 from the CVT path and getting its mean.

15 A full set of tutorials explaining how to install and use EpiGraph is available at  
16 EpiGraph's wiki (<https://imagej.net/EpiGraph>). In addition, Movie S1  
17 summarizes a general example with default options.

### 18 **Graphical user interface.**

19 ImageJ's distribution FIJI (Schindelin et al., 2015, 2012) provides a framework  
20 which offers a range of functions and a suitable predefined application  
21 programming interface (API). Furthermore, it allows users without programming  
22 expertise to execute and exploit all their functionalities. EpiGraph is prepared for  
23 heavy processes. On these cases, some operations such as "calculate  
24 graphlets", perform on background giving the user the possibility of move  
25 around the application smoothly. Besides, a progress bar displays the evolution  
26 of the task in case it could take longer than expected. FIJI works on the three  
27 main Operative Systems (Linux, Mac and Windows) without even require Java  
28 installation since it is usually embedded in the program. FIJI describes different  
29 ways to be operated by external software. One of them is constructing a plugin,  
30 which is used by EpiGraph as basic structure to start building. Using Java

1 Swing GUI libraries, we have designed the three windows of the EpiGraph  
2 plugin.

### 3 - Main Window

4 The program starts after clicking on *Plugins>EpiGraph*. The first window that  
5 appears is the Main Window. It contains a table of processed images (therefore,  
6 initially it is empty). Graphlets calculated data could be instantiated into a table  
7 that is organized by columns. A table's row is composed by these columns:  
8 Colour, label, GDDH, GDDRV, GDDV5, percentage of hexagons, radius of  
9 shape, type of shape, kind of graphlet calculation and the selection of the  
10 graphlets results. *Colour* column lets you pick the colour of the point from the  
11 palette to be visualized later; *Label* shows the name of each image data;  
12 *GDDH*, *GDDRV* and *GDDV5* represent the GDD of the image against  
13 hexagons, random Voronoi diagrams and Voronoi 5 diagrams from CVTn,  
14 respectively; *Percentage of hexagons* contains as his graphlet name said,  
15 proportion of hexagons for all cells involved in graphlet calculation; *Radius*  
16 specify the shape's size used to calculate neighbours; *Shape* characterizes the  
17 type of form used to calculate neighbourhood; *Kind of calculation* displays which  
18 set of graphlets was used. Finally, *Select* column lets you by means of a check  
19 box, the possibility of visualizing or not the calculated data in a 3D viewer, and  
20 in the same way, remove the selected rows if you click on the button *remove*  
21 *rows*. Additionally, you do not need to calculate every single time the graphlets  
22 properties, you can import your own dataset properly formatted from an Excel  
23 file, using *import table* button. Likewise, once you have already analysed  
24 several images, you could export your information into an Excel file, using the  
25 *export table* button. In addition of exporting the data contained into the table, as  
26 tip, you export the polygon distribution of the cells involved in the graphlets  
27 calculation. Lastly, you have the option of representing all table's rows, in which  
28 visualizing check box was typed as true. For that, you should click on *visualize*  
29 button to launch the mentioned 3D viewer.

## 1 - Image processing Window

2 This window will be automatically triggered when a supported file format was  
3 correctly selected, after click over the *open* main window button. This window is  
4 composed by a button panel with different processing options, a canvas with the  
5 loaded image embedded in it and a polygon distribution legend. The only  
6 enabled button when the window just opened will be the mode in which you  
7 label the image. You can choose labelling this image considering 8 connectivity  
8 or 4 connectivity and then, click on *label image* button to execute it. After that,  
9 other buttons become enabled. These buttons are classified in 3 panels:

- 10 • *Region of interest*. The main objective of this panel was selecting regions  
11 of interest to only process valid regions and discard the invalid ones.  
12 *create ROI* and *select cells* buttons let you select various rectangular  
13 (default) regions and picking cell by cell respectively using the FIJI's ROI  
14 manager tool. You could combine repeatedly both options to establish a  
15 valid region in which operating. In addition, you might modify the ROI  
16 selection shape from rectangular to another one, using FIJI's control  
17 panel. On the other hand, we had the option to choose an invalid region  
18 by picking over it, after clicking *add invalid regions* button. This action  
19 only lets you store a set of invalid ROIs at a time, so if you wanted to add  
20 an invalid region after saving previous invalid regions, you will delete the  
21 former to include a new one.
- 22 • *Neighbourhood*. It lets you the possibility of visualizing valid and no valid  
23 cells, invalid regions and polygon distribution values from the current  
24 image. To calculate the neighbourhood you should select, using the  
25 number picker (located close to *radius*), a size of shape in pixels and a  
26 specific geometrical shape using the picker above (located next to  
27 *shape*). This selection depends on the wide of the cells outline, you could  
28 only choose between circular or square shape, but using any size of  
29 pixels. When the parameters have been selected, *test neighbours* button  
30 can be pressed to calculate the neighbourhood for the valid cells  
31 belonging to the ROI. If the ROI is the whole image, a column next to the  
32 legend of polygons shapes, headed by "Graphlets", would be filled with

1 the polygon distributions of the valid cells. Otherwise, if the ROI is a  
2 subsection of the image, the cited column would be filled with the  
3 polygon distribution of the all valid cells participating in the ROI graphlets  
4 calculation. In addition, a new column appears next to “Graphlets”  
5 headed by “ROIs” that would be filled by the polygon distribution of the  
6 valid cells belonging to this ROI.

7 In general, the legend will be completed with the proportion of polygons  
8 and an overlay would be displayed over the canvas, representing the  
9 type of polygons with a specific colour.

10 In addition, *toggle overlay* button lets you visualize or not the overlay  
11 created by *test neighbours*. Black colour labels the invalid regions and  
12 the cells outlines at the overlay, dark grey marks no valid cells, and the  
13 rest of colours (represented in the polygon distribution legend) are  
14 reserved for valid cells. It is important to highlight that the intense colours  
15 of the legend displayed over the canvas represent the number of sides of  
16 the valid cells into the ROI. The same pale colours represent the polygon  
17 distribution of valid cells located out of the ROI affecting to the graphlet  
18 calculation.

19 *Graphlets*. This panel is designed with the aim of saving graphlets data  
20 internally and externally. There is a write section where you can add the  
21 data label (image name by default), located after *image label* text. As  
22 well, you can select a colour label for our data, using *pick a colour* button.  
23 Finally, you choose the appropriated method to calculate graphlets data.  
24 The options are: ‘26 graphlets (Mo29)’ (default), ‘17 graphlets (Mo17)’, ‘9  
25 graphlets (Mo10)’ and ‘7 graphlets (Mo7)’. As soon as the method has  
26 been selected, you can continue clicking *calculate graphlets data* button  
27 to acquire data of calculated graphlets. Once this process has  
28 successfully finished, data are automatically added on the main window  
29 table. Furthermore, clicking over *Export Graphlet data* you can export a  
30 ZIP file containing: a JPG image representing the neighbourhood,  
31 another JPG image capturing the label of the cells, a CSV file storing all

1           calculated graphlets data and a .sif that represent the neighbourhood  
2           network.

3       This window has a progress bar that estimates the process state. As a tip, you  
4       can modify the image zoom by pressing control and rotating the mouse wheel at  
5       same time.

## 6   - Visualizing Window

7       We count with a 3d viewer to display our calculated results stored in the main  
8       window's table. When a row's checkbox is ticked, it will be plotted. To develop  
9       this window, we have used an open source library named Jzy3D  
10      (<http://www.jzy3d.org/>) that is able to create different graphical representations.  
11      In particular, we make use of the 3d scatter plot class.

12      This window will be displayed after click over *visualize* button (located in the  
13      main window), even if your table is still empty. This window is composed by the  
14      scatter plot figure located at left and a set of components to modify the  
15      appearance of this figure at right. The plotted figure is delimited by a 3D box  
16      with 3 axes: Percentage of hexagons, GDDH and GDDRV by default. These 3  
17      axes can be replaced by any of the following configurations (X-Y-Z axes) using  
18      the drop-down list with the label *Axes of figure* (upper right corner of the  
19      window):

- 20       1- GDDH-GDDRV-Percentage of hexagons (default)
- 21       2- GDDH-GDDRV-GDDV5
- 22       3- GDDH-GDDV5-Percentage of hexagons
- 23       4- GDDRV-GDDV5-Percentage of hexagons

24      The Percentage of hexagons axis encapsulate values between 0 – 100, and  
25      the others between 0 – 1. These limits can be modified for zooming the  
26      individual axes. We used 3 *rangeSliders* to choose the range for each axis to be  
27      represented due to the limitations of the Jzy3D library. This library only provides  
28      you the possibility of zooming the Z axis turning the mouse wheel. You can  
29      visualize the three *rangeSliders* (one per axis) just below the *Axes of figure*  
30      drop-down list.

1 Into the scatter plot you can observe by default our CVTn path, displayed as  
2 individual dots: The darkest dot, represents the average of first iterations in  
3 CVTn and the lightest one the average of last iterations of CVTn. You have the  
4 option to disable the visualization of these references clicking on the checkbox  
5 'Show reference' (just below of *rangeSliders*), to only display calculated data.  
6 Besides, it is available the adjustment of the size of the dots modifying the  
7 position for slider bar, just located down the mentioned checkbox.  
8 Distinguishing the different modes in which graphlets data of CVTn reference  
9 can be calculated, a drop-down list can be deploy clicking over the label *Motifs*  
10 *of CVTn reference*. This list, let you the possibility of representing CVTn path  
11 depending on the method in with graphlets are calculated: Mo29, Mo17 (by  
12 default), Mo10 and Mo7. We also have defined four possible combinations of  
13 graphlets that can be computed by EpiGraph: 26 graphlets representing 29  
14 cellular motifs (Mo29), 17 graphlets that represent 17 cellular motifs (Mo17), 9  
15 graphlets on behalf of 10 cellular motifs (Mo10) and 7 cellular motifs represent  
16 by 7 graphlets (Mo7). Mo7 and Mo10 are formed by graphlets of maximum 4  
17 nodes, while Mo17 and Mo29 make use of graphlets of maximum 5 nodes. Mo7  
18 and Mo10 are very useful when images have a small number of cells, since  
19 both require a less number of cells than Mo29 and Mo17.

20 The dots showed in figure from the Main Window can be modified changing  
21 the colour box in the Main Window's table. In addition, a .png figure screenshot  
22 can be saved, pressing *Export view* button. For more detail, different angles and  
23 modes of visualization are available. For instance: clicking the figure and  
24 moving the mouse will turn the vision angle, and double clicking on the figure  
25 will automatically perform a 360 degrees' rotation.

## 26 **Functionalities.**

27 Along the program execution process, we will have the capability of developing  
28 a set of functionalities:

### 29 - Label image

30 Once you have selected an image to process, this image is binarized and the  
31 background is analysed to consider what is the cells colour and outlines colour.  
32 If the number of white pixels is higher than black pixels, white pixels will be



1 considered as cell's body, and vice versa. After that, each cell's body region of  
2 the image is assigned with a unique label. Thanks to the extensible architecture  
3 of FIJI, in which you can install plugins to add additional functionalities, this  
4 process of labelling regions is made using MorphoLibJ (Legland et al., 2016)  
5 functionalities. Specifically, using the connected component labelling that  
6 transforms a binary image into a labelled one by assigning a specific number to  
7 each connected component.

#### 8 - Testing neighbours

9 As mention on previous section, EpiGraph is able to calculate the polygon  
10 distribution with a given pixel radius and an element's shape. To ensure that the  
11 neighbourhood is correctly captured, we empower the users to verify if the  
12 image has the right parameters by themselves. The polygon distribution of the  
13 image will appear with numbers at the left side of the window and, also, painting  
14 each cell with a colour representing its number of sides. As well, dark grey  
15 almost black will represent no valid cells. Depending on the number of graphlets  
16 you'd like to see, the affected zone will be established by a group of cells or  
17 another. These internal calculations for neighbourhood will be exploited by  
18 *calculate graphlets* module, while parameters are not modified since this step.

#### 19 - Create ROI

20 Though you may analyse the image as it comes, you could also process only a  
21 region of interest (ROI). Through FIJI's Roi Manager we can manage the ROIs,  
22 saving and doing operations between each other. Nevertheless, we have only  
23 selected as default operations within EpiGraph: rectangle (or any available  
24 shape) and multipoint selection. The former creates a rectangle selection (by  
25 default) and adds all the cells that fall inside it as valid cells. The latter, enables  
26 the multipoint function and it lets select individual cells. Yet, you might want to  
27 change these default form of selection, going straight to FIJI's main window and  
28 pick any of the toolbar.

#### 29 -Pick invalid regions

30 Owing to your image may present artefacts as false valid cells, we provide the  
31 possibility to mark these zones as invalid region. All valid cells surrounding the  
32 mentioned invalid region will be considered as "no valid cells". On this behalf, it

1 is possible select, with the multipoint tool, several areas of the image to make  
2 them over into invalid sections. To validate this action, picked invalid region  
3 should have the same colour than cells' background.

#### 4 - Calculate graphlets

5 The main course of EpiGraph is the graphlet comparison. It is supposed to be  
6 the final step of the algorithm and pipeline. It begins checking if there are any  
7 selected cells or ROIs. Then, in case any configuration has changed, we re-  
8 compute the neighbourhood, otherwise we take the information from a previous  
9 computation. From this neighbourhood and valid cells, it calculates the  
10 graphlets for the involved network of neighbours. As mentioned on previous  
11 sections, it would be incoherent not to filter the graphlets, so we refine it by  
12 adding to the final graphlets only the nodes with a fixed distance to the border  
13 nodes. We first calculate the total set of graphlets for valid cells, and then, we  
14 select a filtering that depends on the chosen type of Graphlets to be implicated:  
15 Mo29 (26 graphlets), Mo17 (17 graphlets), Mo10 (9 graphlets) and Mo7 (7  
16 graphlets). The involved orbits nodes for graphlets calculations will be referred  
17 as 4' and 5' valid cells. When we have the final graphlets, we calculate the three  
18 distances (GDDH, GDDRV and GDDV5). Depending on the number of  
19 graphlets selected, a variable number of orbits are used on the comparison. At  
20 last, the results will be added automatically to the table on Main Window.

#### 21 - Visualization

22 Visualizing results properly is a major feature and an important challenge to  
23 interpret results. Thus, we have embedded Jzy3d chart in a Java's *JDialog*  
24 where you can visualize the calculated results three coordinates (any  
25 combination of GDDH, GDDRV, GDDV5 and percentage of hexagons) as a  
26 point in a scatter plot. Once the points are represented you can compare them  
27 with our CVTn reference. On this behalf, you may want to change the illustrated  
28 CVTn selecting the number of graphlets used on the computations, although it  
29 is advisable to compare images with the same configuration (Mo7, Mo10, Mo17  
30 or Mo29). Additionally, there is a possibility of increasing or decreasing the size

1 of the dots and zoom manually each axis. Finally, you can export the actual  
2 view of the chart to an image file.

### 3 **Dependencies.**

4 FIJI is designed to add functionalities via several ways, one of them is Plugin.  
5 In order to have a simple control of dependencies and project settings, it uses  
6 Maven. Maven is a tool that is broadly used for supervising and build Java-  
7 based projects. It integrates several tools, such as Javadoc, to make easy all  
8 the programming steps. Likewise, dependencies are downloaded and updated  
9 when available. Furthermore, it helps you create the package with all your code  
10 and zip it in a .jar file that will be the Plugin format of FIJI. All this is achieved  
11 through its project object model (POM), which you can shape to your project  
12 adding mailing list, issue tracking and more.

### 13 **Supported file formats.**

14 EpiGraph's input is an image. This image should be properly segmented and  
15 grey-scale, still, there are several options within EpiGraph to configure it  
16 depending on the type of the image. We allow images with different size of  
17 borders, since it can be permitted to increase the radius of the mask, changing  
18 the way in which neighbourhood is built. We make no distinction between colour  
19 depth, supporting images from 8-bit to 32-bit. However, it is mandatory that  
20 images have to be binary images, where one colour is presented as the  
21 background, forming the body of cells, and the other one the cells outline.  
22 Regarding the image file extensions, we entrust FIJI the image opening and the  
23 supported files as well, so individual image file extensions allowed by FIJI would  
24 be supported in EpiGraph. We cannot admit any sequence of images and single  
25 images with high resolution due to problems with complexity in EpiGraph  
26 processing tasks. Accordingly, we limit the maximum of 3000px to either height  
27 or width of the image, for a correct execution of the program.

### 28 **Quick step-by-step EpiGraph's usage.**

1 - Installation

2 *Through FIJI/ImageJ update site:*

3 The usual way to install a FIJI plugin is through his on-site updater. It's usually  
4 located on "*Help > Update FIJI*". Once, it's open, you click on "*Manage updates*  
5 *sites*", look for EpiGraph and tick the checkbox next to it. Finally, "*Apply*  
6 *changes*" and you should have successfully installed this plugin. With this  
7 option, you can automatically get the latest version of EpiGraph.

8 *Manually:*

9 On the other hand, you may just want to download the .jar file from  
10 <http://tinyurl.com/EpiGraph-Plugin> (or even generate your own .jar from source  
11 code) and install it manually. On this purpose, you could click either  
12 *Plugins>Install or Plugins>Install Plugin*. So, you select the provided .jar and  
13 you should be able to run EpiGraph.

14 - Simple example of a complete analysis

15 Calculate GDDH, GDDRV, GDDV5 and percentage of hexagons from a given  
16 image and visualize it in the 3D visualizer.

- 17 1. Select *open*.
  - 18 a. Select a supported image.
  - 19 b. If the image is correct, a window with the image will appear.
- 20 2. Pick connectivity:
  - 21 a. Select the connectivity of your image. Usually 8-connectivity.
  - 22 b. Press *label*.
- 23 3. Default configuration:
  - 24 a. Radius of 3 pixels.
  - 25 b. Circle shape.
- 26 4. Calculate graphlets:
  - 27 a. Write a name for your image.
  - 28 b. Pick a colour for your image.
  - 29 c. Select in the combo box to *Mo29 (26 graphlets)*.
  - 30 d. Press *calculate graphlets*. This will calculate GDDH, GDDRV and  
31 GDDV5.

- 1 e. Once it is finished, if name box is not empty, data would be added
- 2 to the main window's table.
- 3 5. Export graphlets data:
- 4 a. EpiGraph create a zip with several files. Obtains an image with all
- 5 the cells labelled with their corresponding identifier. Another image
- 6 representing the polygon distribution and, finally, a '.csv' file with
- 7 the graphlets for all the cells.
- 8 b. Press the *Export graphlets data* button.
- 9 6. Visualize your results:
- 10 a. Return to the main window.
- 11 b. Click on *visualize*.
- 12 7. Export view:
- 13 a. Staying at the visualizing window, you always have the option of
- 14 exporting the actual view into a '.png' file.
- 15 b. Press *export view*.

16 Congratulations! You have done the complete pipeline. Now, check where is  
17 your image regarding the CVTn scale. You should analyse whether or not your  
18 image is near the CVTn (reference).

19 - Create region of interest

20 In the case you would like to test a given region of your images, you can  
21 create a region of interest (ROI). We already have an image opened and  
22 labelled within EpiGraph.

- 23 1. On the image processing window:
- 24 a. Press *Create ROI*.
- 25 b. Although, the default ROI is square shaped, you may want to test
- 26 another shape. You can now return to FIJI application and select
- 27 any of the existing ones on the toolbar.
- 28 c. Click *done*. Your ROI is managed and stored in FIJI Roi Manager.

29 You have already created your ROI, nonetheless, you cannot see how affect it  
30 to the image yet.

- 31 2. Press *Testing neighbours*:

1           a. An image representing each cell by its number of  
2 neighbours will appear as overlay in your image. Remember that  
3 the valid cells into the ROI, appear with intense colour, and the  
4 pale colours represent the rest of valid cells that affect the  
5 computation of graphlets. These cells will also be represented in  
6 the polygon distribution legend.

7  
8       Once this procedure has been accomplished, you could continue the  
9 execution in the same way than before: graphlet calculation, exportation of  
10 results and visualization.

#### 11 - Combine ROIs

12       Since regions of interest are managed by the ROI manager you could add  
13 several ROIs to the image. You have already opened the image and properly  
14 labelled.

##### 15       1. Press *Create Roi*:

16           a. Select a left region. You should not select any of the cells on the  
17 right yet.

18           b. *Done*.

##### 19       2. Select individual cells:

20           a. Click *Select cells*.

21           b. Pick only cells on the right.

##### 22       3. Test your setup:

23           a. You should be able to see the cells inside that fall into both ROIs.

24           b. Press *test neighbours*.

##### 25       4. Oh! You realize you have made a mistake:

26           a. You do not want the first ROI.

27           b. Go to the ROI manager.

28           c. Select the first ROI and click Delete.

##### 29       5. Test the new selection:

30           a. You now will represent only the existing ROI on the right.

31           b. Click *test neighbours* again.

1 If you create some ROIs, the select cells will be all the cells that fall into any of  
2 the ROIs. The logical operation would be an OR, so ROIs could be disjoint.

### 3 - Selection of the number of motifs

4 There are 4 possible configurations, now we will be creating an analysis with  
5 Mo17 using only 17 graphlets.

6 1. Open an image with only 4-connected elements and borders with 3 or  
7 more pixels (for a different example).

8 2. Label it:

9 a. Select now 4-connectivity.

10 b. Click *label*.

11 3. Test if neighbours are correct:

12 a. Since you do not know what the radius pixels you should select,  
13 test various shapes and radius in order to see if the cells with 6  
14 neighbours are really 6-sided cells.

15 b. Change parameters and click on *test neighbours* to make sure the  
16 neighbourhood is fine.

17 4. Mo17:

18 a. With this configuration, we have seen that there are no strange  
19 'jumps' between iterations of CVTn, so you will be able to see a  
20 trustable result.

21 b. Hold in the combo box the default option, *Mo17 (17 graphlets)*.

22 5. Calculate graphlets:

23 a. Add a proper name to your image.

24 b. Press calculate graphlets to add results to the table.

25 6. Visualizing:

26 a. Change the colour of your row to a pink-ish colour. This will let you  
27 differentiate your data from the reference, which is black, grey and  
28 almost white.

29 b. Click on *Visualize*.

30 c. At default, your reference is *Mo17 (17 graphlets)*. So, preserve  
31 this option in the combo box.

32 d. Modify the axes of figure to 'GDDH-GDDRV-GDDV5'.

1 e. Change the range sliders at your right side to get an adjusted  
2 visualization per axis.

3 You will see that the reference has changed and your image is probably  
4 alienated to the CVTn reference. This is because your image is within the CVTn  
5 path, otherwise the image organization would be different to our model of  
6 reference.

#### 7 - Import/export table

8 You may want to save your results somehow, to achieve this, you might export  
9 your results to an excel file. As simple as pressing the button export in the main  
10 window.

11 On the other hand, if you would like to continue your session right where you  
12 left, you could import your exported excel file to the table and carry on with your  
13 analysis. You can add as many .xls files to the table as you want, we allow  
14 duplicates. If you want to remove them, just tick them at the *Select all* column  
15 and click on *Delete rows*.

#### 16 Troubleshooting

17 If the visualization is not working properly, you may need to update FIJI after  
18 the installation.

19 If you find something weird with any functionality of the application, you can  
20 send a e-mail to [pvicente1@us.es](mailto:pvicente1@us.es) or [pgomez-ibis@us.es](mailto:pgomez-ibis@us.es). Reporting bugs can  
21 also be made through Github  
22 <https://github.com/ComplexOrganizationOfLivingMatter/Epigraph/issues>. Known  
23 issues are held at the same page.

#### 25 **License Information.**

26 To encourage the sharing of resources, EpiGraph is published under an  
27 open-source (GPLv3) license, which can be downloaded from  
28 [https://github.com/ComplexOrganizationOfLivingMatter/Epigraph/blob/master/LI](https://github.com/ComplexOrganizationOfLivingMatter/Epigraph/blob/master/LICENSE)  
29 [CENSE](#).



1 **SUPPLEMENTAL FIGURES**

2

3 **Figure S1. Graphlets and orbits configuration.** Illustration of graphlets  
4 networks used in (Pržulj, 2007). Each graphlet configuration is labelled with  $G_n$ ,  
5 in which, 'n' is the graphlets number (from  $G_0$  to  $G_{29}$ ). These labels match with  
6 the cellular motifs in (**Fig. 1**). Each vertex represents a cell and each edge the  
7 connection between two cells. Therefore, the graphs represent the connectivity  
8 network for each matched cellular motif. The three graphlets labelled in red  
9 ( $G_{20}$ ,  $G_{22}$  and  $G_{25}$ ) are the ones discarded in our work. The digits (from 0 to 72)  
10 into some mauve vertices indicate the orbits number counted for the GDD  
11 calculation.

12

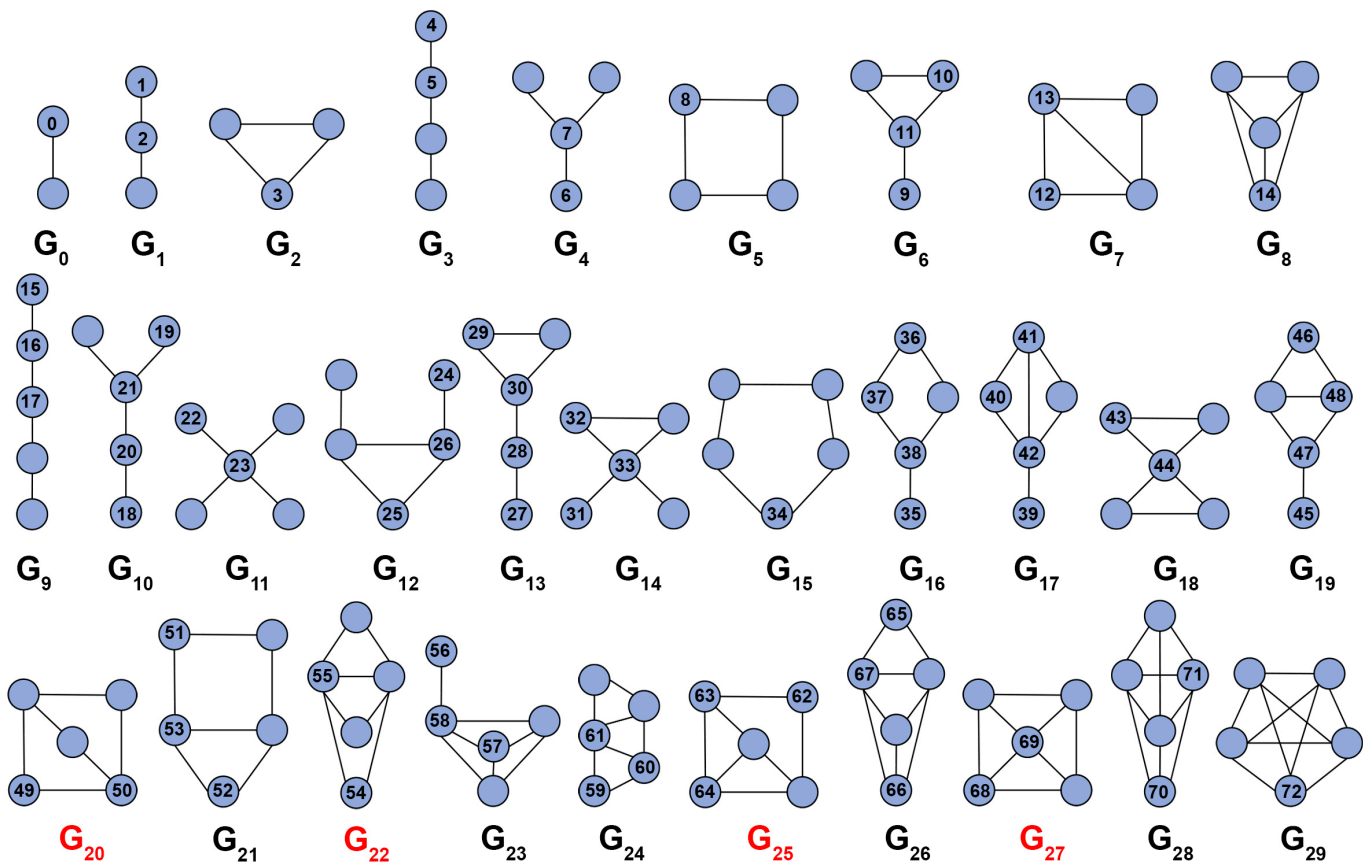

1 **Figure S2. Pipeline for the Graphlet degree Distribution agreement**  
2 **Distance (GDD) calculation.** Scheme representing the protocol sequence to  
3 calculate the GDD between two segmented images: Eye and Diagram 1. First, a  
4 network of cells-to-cells contacts is computed defining the centroids of valid  
5 cells as nodes and its connections with neighbouring cells as edges. The nodes  
6 are represented with the same colour code as in **Fig. 2**. Second, the graphlets  
7 are extracted from the network. This enables the calculation of an index of the  
8 distribution of every graphlet. Finally, a comparison between the two Graphlet  
9 degree Distributions is performed to obtain the GDD value.  
10

SEGMENTED  
IMAGE

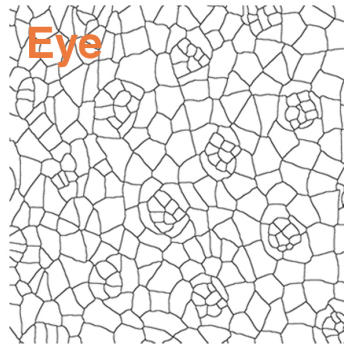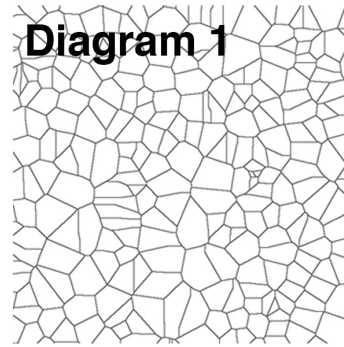

CELL-TO-CELL  
NETWORK

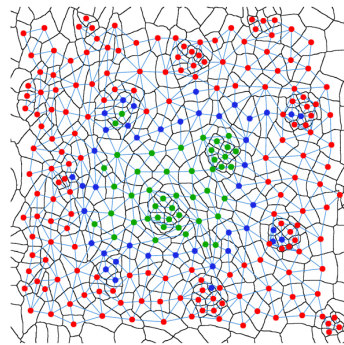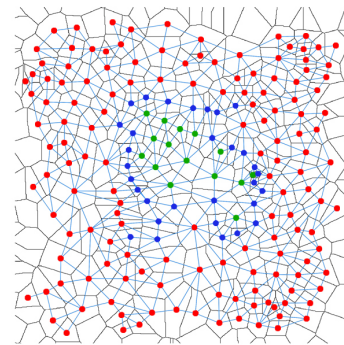

GRAPHLETS  
EXTRACTION

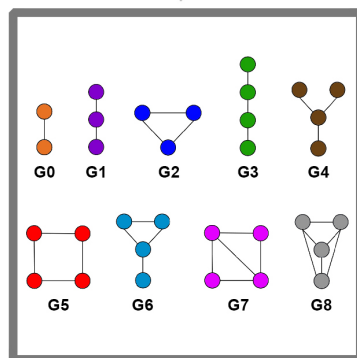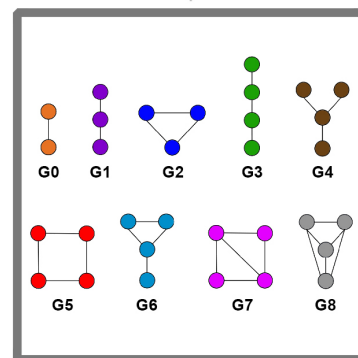

GRAPHLETS  
DEGREE  
DISTRIBUTION

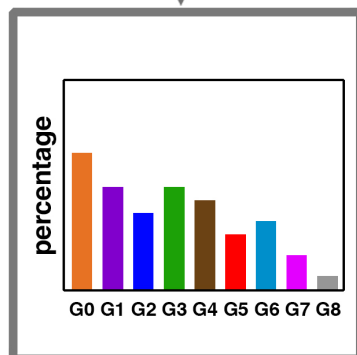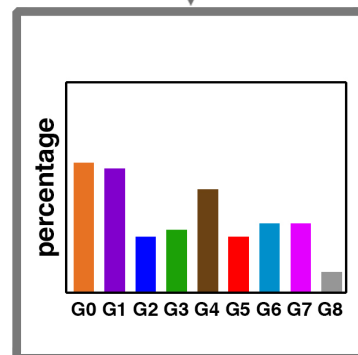

Graphlet degree  
Distribution  
agreement Distance

1 **Figure S3. Epithelial organization of biological tissues with respect CVT.**  
2 **A-D)** Same configurations as (**Fig. 2D-G**) for Mo17 of GDDH, GDDRV, GDDV5  
3 and percentage hexagons, but using CVT path instead of CVTn. The diagrams  
4 of the CVT started with iteration 1 and finished with iteration 700. CVT is  
5 represented as a grayscale gradient from black, reducing its darkness with the  
6 increase of the iterations.  
7

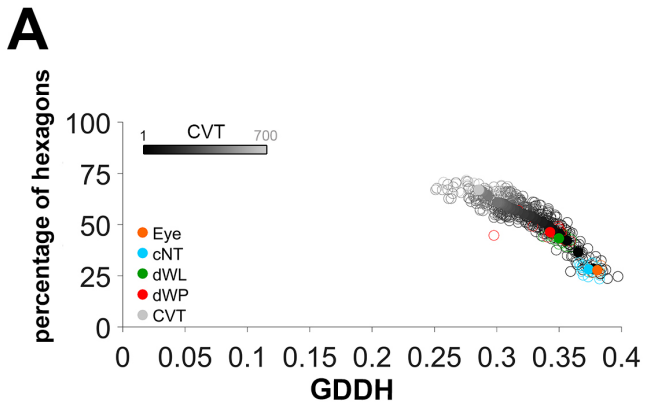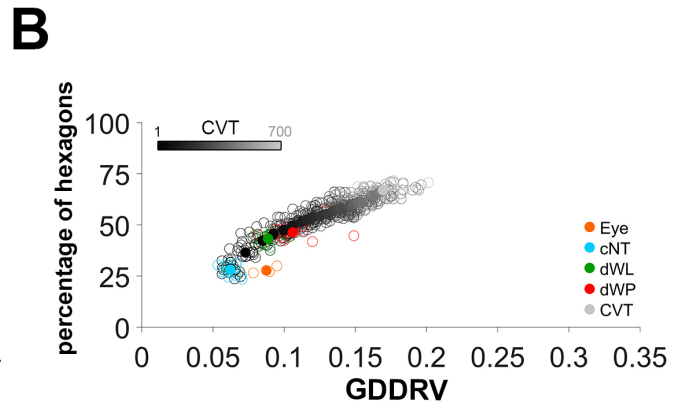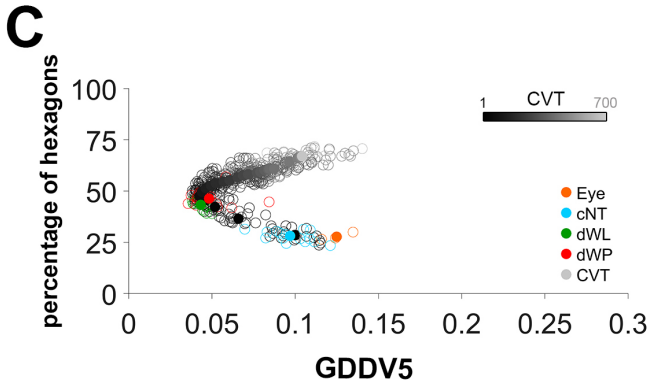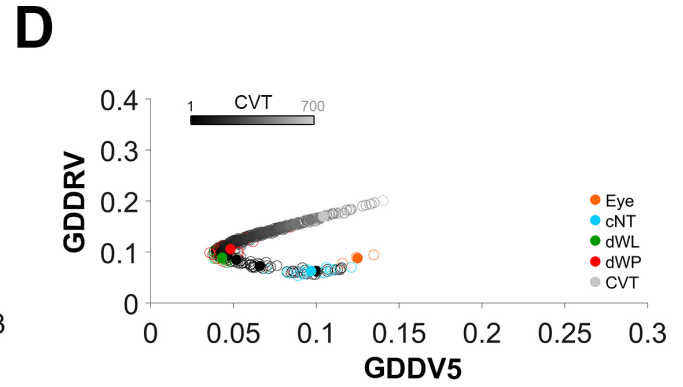

1 **Figure S4. Extra combinations for Mo17: CVTn, mutants and simulations.**  
2 **A-D)** Several GDD combinations (A: Percentage of hexagons vs GDDV5; B:  
3 GDDH vs GDDV5; C: Percentage of hexagons vs GDDRV; D: GDDH vs  
4 GDDRV) using Mo17 for CVTn, Eye, cNT, dWL, dWP, CVTw1 and CVTw2,  
5 represented exactly as (**Fig. 3 B-C**). **E-H)** Values of the percentage of hexagons  
6 vs GDDV5 (Mo17) (E), GDDH vs GDDV5 (F), percentage of hexagons vs  
7 GDDH (G) and GDDH vs GDDRV (H) for CVTn, Eye, cNT, dWL, dWP, Control,  
8 Case III and Case IV. These graph complement (**Fig. 3 H-I**).  
9

**A**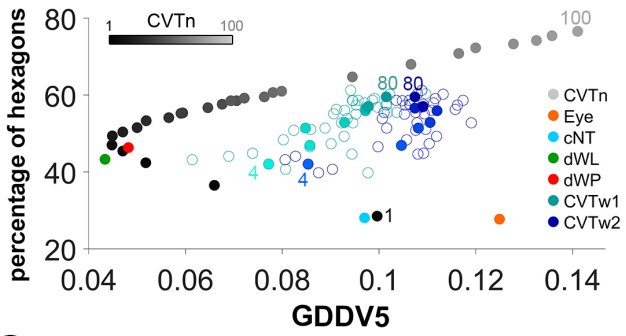**B**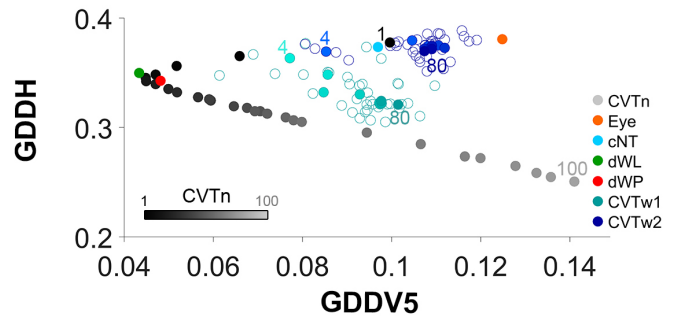**C**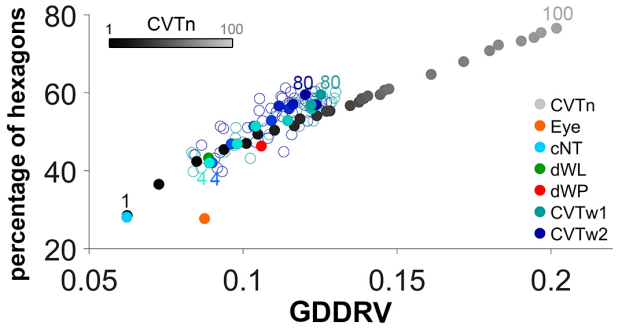**D**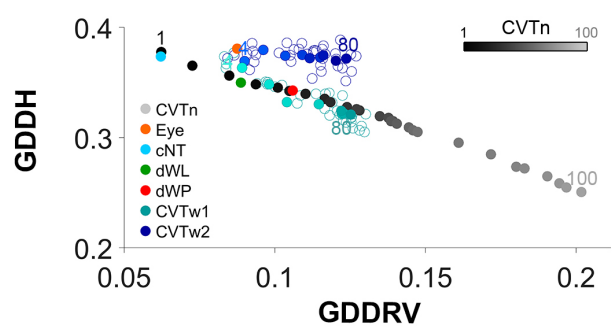**E**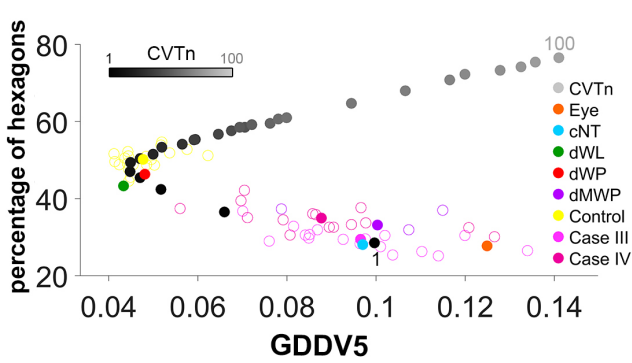**F**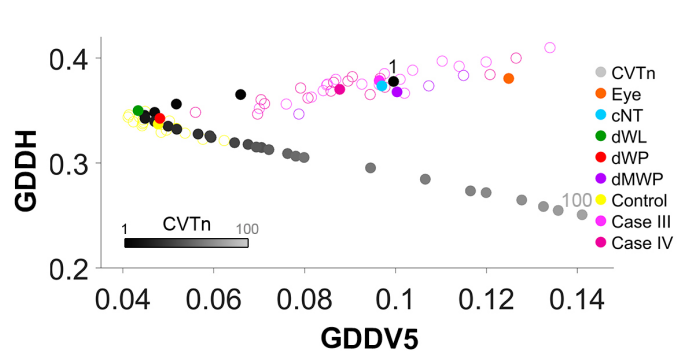**G**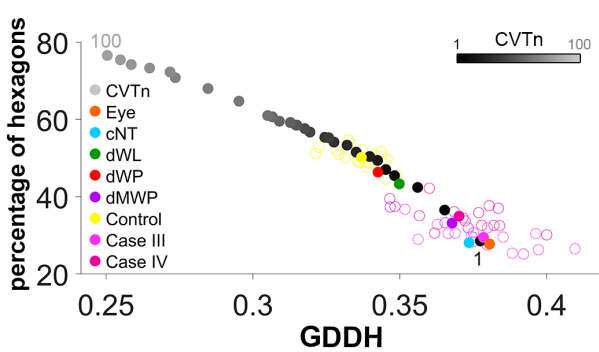**H**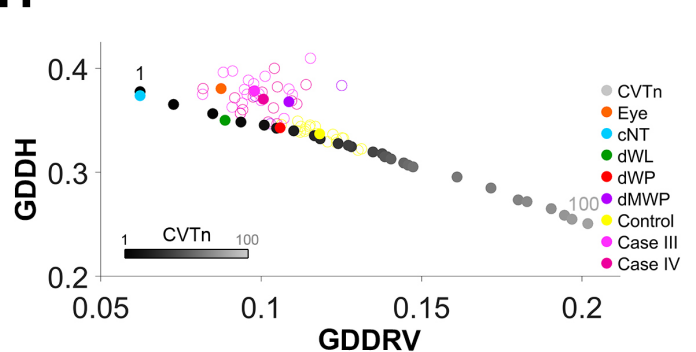



## 1 LEGENDS OF SUPPLEMENTAL FILES

2 **Movie S1. A general example of the usage of EpiGraph.** The movie shows  
3 how to add the data of a new image using default options.

4  
5 **Table S1. GDD values between pair of images from natural images and**  
6 **Voronoi Diagrams.** Graphlet degree Distribution agreement Distance mean  
7 between each row and column is shown. Data is divided by the used cellular  
8 motifs (Mo17 and Mo29). The used samples are Voronoi 1, 4 and 5: 20  
9 replicates; dWP: 16 replicates; dWL: 15 replicates; Eye: 3 replicates.

10

11 **Table S2. GDDs and percentage of hexagons of CVTn reference using all**  
12 **the cellular motifs sets.** Data are distributed depending on the cellular motifs  
13 used (Mo7, Mo10, Mo17, Mo29). Mean and standard deviation of percentage of  
14 hexagons, GDDH, GDDRV and GDDV5 are shown, along with their associated  
15 diagram. 20 replicates of each diagram are represented.

16

## 17 REFERENCES

18 Legland, D., Arganda-Carreras, I., Andrey, P., 2016. MorphoLibJ: integrated  
19 library and plugins for mathematical morphology with ImageJ. *Bioinformatics* 32,  
20 btw413. doi:10.1093/bioinformatics/btw413

21 Pržulj, N., 2007. Biological network comparison using graphlet degree  
22 distribution. *Bioinformatics* 23, 177–183. doi:10.1093/bioinformatics/btl301

23 Schindelin, J., Arganda-Carreras, I., Frise, E., Kaynig, V., Longair, M.,  
24 Pietzsch, T., Preibisch, S., Rueden, C., Saalfeld, S., Schmid, B., Tinevez, J.-Y.,  
25 White, D.J., Hartenstein, V., Eliceiri, K., Tomancak, P., Cardona, A., 2012. Fiji:  
26 an open-source platform for biological-image analysis. *Nat. Methods* 9, 676–  
27 682. doi:10.1038/nmeth.2019

28 Schindelin, J., Rueden, C.T., Hiner, M.C., Eliceiri, K.W., 2015. The ImageJ  
29 ecosystem: An open platform for biomedical image analysis. *Mol. Reprod. Dev.*  
30 82, 518–529. doi:10.1002/mrd.22489

31 Yaveroğlu, Ö.N., Malod-Dognin, N., Davis, D., Levnajic, Z., Janjic, V.,  
32 Karapandza, R., Stojmirovic, A., Pržulj, N., 2014. Revealing the Hidden  
33 Language of Complex Networks. *Sci. Rep.* 4, 1–9. doi:10.1038/srep04547

34
