# Supplementary material for: EpiGraph: an open-source platform to quantify epithelial organization
Source: bioRxiv or medRxiv preprint supplement (doi:10.1101/217521), 2019-08-05
Supplement: Supplementary file [file 217521-2.pdf]

# 1 EpiGraph: an open-source platform to quantify 2 epithelial organization.

## 3 4 Supplemental Information.

### 5 6 SUPPLEMENTAL EXPERIMENTAL PROCEDURES

#### 7 EpiGraph Source code.

8 The project's code is accessible through Github  
9 <https://github.com/ComplexOrganizationOfLivingMatter/Epigraph>. It is open  
10 source and available under GPLv3 license.

#### 11 Pipeline.

12 The image processing pipeline entails cell recognition, valid cell identification,  
13 graph of cell-cell contact creation, polygon distribution analysis and, finally,  
14 GDDH, GDDRV and GDDV5 calculation. These stages are properly described in  
15 the subsequent paragraphs. In addition, a full set of tutorials explaining how to  
16 install and use EpiGraph are available at EpiGraph's wiki  
17 (<https://imagej.net/EpiGraph>). In addition, **Movie S1** summarizes a general  
18 example with default options.

#### 19 20 - Recognition of existing cells

21 EpiGraph uses segmented images from natural tissues or simulations as an  
22 input. These images must be built in binary format, where one colour should be  
23 presented as the background, forming the body of cells, and the other one the  
24 cells outline. Each cell is assigned a label using MorphoLibJ (Legland et al.,  
25 2016). This identifier allows us to have a record of every cell and its location on  
26 the image, which is necessary for the following steps.

#### 27 - Identification of valid cells

28 Once we have properly labelled the image, we proceeded to fully analyse it. By  
29 default, an invalid region is created, which is initially defined by the boundaries of

1 the image itself. We select all the cells that fall outside of this border and set them  
2 as non-valid cells (note that non-valid cells are different from invalid regions, i.e.  
3 the latter are not cells). In this way, we avoid incorrect characterization of polygon  
4 distribution due to the lack of real neighbours in the margins of the image.  
5 However, it is also possible to create a personalized invalid region, by selecting  
6 as many cells as you want.

7 In addition, we define another two kinds of valid cells: the 4' valid cells and the  
8 5' valid cells. The former represents the cells that do not have a non-valid cell  
9 within a distance of four cells connexions. The later kind is formed by the cells  
10 having all valid cells in a maximum length of five cells connexions. Mo7 and Mo10  
11 require 4' valid cells and Mo17 and Mo29 5' valid cells.

#### 12 - Neighbourhood creation

13 An epithelium can also be considered as a tessellation because there is no  
14 space between each cell. Thus, inspecting the number of sides of the cells, we  
15 can measure the number of neighbours that will surround it. We, therefore, extend  
16 a mask from each pixel of the cell with a given shape and size, both selected by  
17 the user. Then, we capture all the cells distinct from the actual cell that fall into  
18 this mask and add them as neighbours of the concrete cell. Afterwards, we create  
19 a neighbourhood network, modelling each cell as a node and connecting two cells  
20 with an edge if they are neighbours.

#### 21 - Polygon distribution analysis

22 The polygon distribution is defined by the number of sides of every valid cell.  
23 We specify three different areas: the global zone formed by all valid cells, the  
24 region in which 4' valid cells are contained and the territory in which 5' valid cells  
25 are placed. For Mo7 and Mo10, we use a path of length 4 (4' valid cells as orbits  
26 nodes, and valid cells as its branching nodes), and for Mo17 and Mo29 the area  
27 is defined by the cells contained within the path of length 5 (5' valid cells as orbits  
28 nodes, and valid cells as its branching nodes). Finally, we calculate the polygon  
29 distribution regarding the cells involved in the graphlet calculation.

1 - GDDH, GDDRV and GDDV5 calculation

2 We have adapted Graphlet degree Distribution agreement Distance (GDD) from  
3 Yaveroğlu et al. (Yaveroğlu et al., 2014) to fully integrate it with FIJI java  
4 environment. We use GDD to compare two images and describe how similar they  
5 are. In particular, minimum distance value (0) means two images are equal, and  
6 maximum distance value (1) specifies that they are very different in terms of  
7 graphlets. We compute all the graphlets in which the valid cells participate. Then,  
8 we use only the graphlets in which 4' or 5' valid cells are included (depending on  
9 the set used). We defined three references to compare with the real images. The  
10 first one is the Graphlet degree Distribution agreement Distance Random Voronoi  
11 (GDDRV). A random Voronoi (RV) emerges from 500 seeds randomly placed.  
12 Then, we computed the GDD between each one of the 20 RV images and the  
13 input image and used the mean of these 20 GDDs as final distance. We also  
14 calculated the Graphlet degree Distribution agreement Distance Hexagons  
15 (GDDH), which measures the difference between a given image and a regular  
16 tessellation of hexagons, in a similar way to the GDDRV. Finally, we computed  
17 the Graphlet degree Distribution agreement Distance Voronoi 5 (GDDV5) by  
18 comparing a given image with 20 diagram 5s from the CVT path and calculating  
19 its mean.

20 - Statistical analysis

21 Right before adding all the GDD values to the table, we performed a statistical  
22 analysis (see **Experimental procedures, statistical analysis**) to calculate the  
23 closest diagram on the CVTn. This test provides a confidence score determining  
24 if the source image is part of the CVTn path of reference or, on the contrary, is  
25 an outlier.

26 **Graphical user interface.**

27 ImageJ's FIJI distribution (Schindelin et al., 2015, 2012) provides a framework,  
28 which offers a range of functions and a suitable predefined application  
29 programming interface (API). Furthermore, it allows users with no programming  
30 expertise to execute and exploit all their functionalities. EpiGraph is prepared for  
31 heavy processes. In these cases, some operations such as "calculate graphlets",

1 run in the background, giving the user the possibility to move around the  
2 application smoothly. In addition, a progress bar displays the evolution of the task  
3 in case it may take longer than expected. FIJI works on the three main Operative  
4 Systems (Linux, Mac and Windows) without requiring Java installation since it is  
5 usually embedded in the program. FIJI describes different ways it can be  
6 operated by external software. One of them is constructing a plugin, which is used  
7 by EpiGraph as basic structure to start building. Using Java Swing GUI libraries,  
8 we have designed the three windows of the EpiGraph plugin.

### 9 - Main Window

10 The program starts after clicking on *Plugins>EpiGraph*. The first window that  
11 appears is the Main Window. It contains a table of processed images (therefore,  
12 initially it is empty). Each table row corresponds to a single processing of image  
13 and comprises the following columns: Colour, label, GDDH, GDDRV, GDDV5,  
14 percentage of hexagons, radius of shape, type of shape, kind of graphlet  
15 calculation, closest diagram, confidence score and a checkbox. *Colour* column  
16 lets you pick the colour of the point from the palette to be visualized later; *Label*  
17 shows the name of each image; *GDDH*, *GDDRV* and *GDDV5* represent the GDD  
18 of the image against hexagons, random Voronoi diagrams and Voronoi 5  
19 diagrams from CVTn, respectively; *Percentage of hexagons* contains the  
20 proportion of hexagons for all valid cells involved in graphlet calculation; *Radius*  
21 specifies the shape size used to calculate neighbours; *Shape* characterizes the  
22 type of form used to calculate neighbourhood; *Kind of calculation* displays which  
23 set of graphlets was used; *Closest diagram* represents which number Voronoi  
24 diagram from the CVTn is closest to the image; *Confidence score* is the certainty  
25 of the image being an inlier of the point cloud of that diagram. Finally, *Select*  
26 column lets you choose, by means of a check box, whether you visualise the  
27 calculated data in a 3D viewer or not, and in the same way, removes the selected  
28 rows if you click on the button *remove rows*. Additionally, you do not need to  
29 calculate the graphlet properties every single time. Instead, it is possible to import  
30 your own dataset from a properly formatted Excel file, using the *import table*  
31 button. Likewise, once you have already analysed several images, you can  
32 export your information into an Excel file, using the *export table* button. The

1 exported table includes the polygon distribution of the cells involved in the  
2 graphlets calculation. Lastly, you have the option of representing all table rows,  
3 by ticking the “true” check box. For that, you should click on the *visualize* button  
4 to launch the mentioned 3D viewer.

#### 5 - Image processing Window

6 This window will be automatically triggered when a supported file format is  
7 correctly selected, after clicking the *open* main window button. This window is  
8 composed of a button panel with different processing options, a canvas with the  
9 loaded image embedded in it and a polygon distribution legend. The only enabled  
10 button when the window is first opened, will be the mode in which you label the  
11 image. You can choose to label this image using either 8-connectivity or 4-  
12 connectivity and then click on the *label image* button to execute it. After these  
13 other buttons become enabled. These buttons are classified in 3 panels:

- 14 • *Region of interest*. The main objective of this panel is selecting regions of  
15 interest so that only valid regions are processed and invalid ones are  
16 discarded. The *create ROI* and *select cells* buttons let you select various  
17 rectangular (default) regions and pick individual cells using the FIJI’s ROI  
18 manager tool. You can repeatedly combine both options to establish a  
19 valid region in which to operate. Furthermore, you can change the ROI  
20 selection shape, from rectangular to another shape, using FIJI’s control  
21 panel. On the other hand, there is the option to choose an invalid region  
22 by clicking over it, after clicking the *add invalid regions* button. This action  
23 only lets you store a single set of invalid ROIs at a time, so if you wanted  
24 to add an invalid region after saving previous invalid regions, you must  
25 delete the former to include a new one.
- 26 • *Neighbourhood*. This panel allows you to visualize valid and non-valid  
27 cells, invalid regions and polygon distribution values from the current  
28 image. To calculate the neighbourhood you should select, using the  
29 number selector (located close to *radius*), a size of shape in pixels and a  
30 specific geometrical shape using the tool described above (located next to  
31 *shape*). This selection depends on the width of the cell outline. If the border  
32 cells have a width of 1 pixel, it is enough using a size of 3 pixels to explore

1 the cells vicinity. By default, we expand 3 pixels each cell, using the  
2 circular shape, to look for their neighbours. For wider border cells, you can  
3 choose higher size of mask with either circular or squared shape. Once  
4 the parameters have been selected, the *test neighbours* button can be  
5 pressed to calculate the neighbourhood for the valid cells belonging to the  
6 ROI. If the ROI is the whole image, a column next to the legend of polygons  
7 shapes, headed by “Graphlets”, would be filled with the polygon  
8 distributions of the valid cells. Otherwise, if the ROI is a subsection of the  
9 image, a new column appears next to “Graphlets” headed by “ROIs” that  
10 will be filled by the polygon distribution of the valid cells belonging to this  
11 ROI. Note that in this case, the “Graphlets” column would be filled with the  
12 polygon distribution of the all valid cells participating in the ROI graphlets  
13 calculation.

14 Finally, when the columns are filled, an overlay is displayed on the canvas, representing  
15 each cell colour coded by polygon number. These colours are the same that the ones at  
16 the legend located at the left of the window. In addition, the *toggle overlay* button  
17 lets you choose whether to visualize the overlay created by *test*  
18 *neighbours*. The invalid regions and the cells outlines are labelled in black  
19 in the overlay, dark grey marks non-valid cells, and the rest of colours  
20 (represented in the polygon distribution legend) are reserved for valid  
21 cells. It is important to highlight that the bright colours of the legend  
22 displayed over the canvas represent the number of sides of the valid cells  
23 into the ROI. The same pale colours represent the polygon distribution of  
24 valid cells located out of the ROI, yet which still contribute to the graphlet  
25 calculation of cells within the ROI. A 5’ valid cell is a cell that do not have  
26 a no valid cell within a distance of five cells connexions. Moreover, a 4’  
27 valid cells have no valid cells in at least three branched cells.

28 • *Graphlets*. This panel is designed with the aim of saving graphlet data  
29 internally and externally. There is a text box where you can add the data  
30 label (image name by default), located after *image label* text. You can also  
31 select a colour label for your data, using *pick a colour* button. Finally, you  
32 can choose the appropriate method to calculate graphlets data. The

1 options are: 26 graphlets representing 29 cellular motifs (Mo29), 17  
2 graphlets that are contained in 17 cellular motifs (Mo17), 9 graphlets on  
3 behalf of 10 cellular motifs (Mo10) and 7 graphlets typifying 7 cellular  
4 motifs (Mo7). Mo7 and Mo10 are formed by graphlets of maximum 4  
5 nodes, while Mo17 and Mo29 make use of graphlets of maximum 5 nodes.  
6 Mo7 and Mo10 are most useful when images have a small number of cells,  
7 since both require fewer cells than Mo29 and Mo17. Once the method has  
8 been selected, you can then click the *calculate graphlets data* button to  
9 acquire data for all calculated graphlets. When this process is complete,  
10 data are automatically added to the main window table. Furthermore, by  
11 clicking on *Export Graphlet data* you can export a ZIP file containing: a  
12 JPG image representing the neighbourhood, another JPG image  
13 capturing the label of the cells, a CSV file storing all calculated graphlet  
14 data and a .sif that represent the neighbourhood network.

15 The window has a progress bar that estimates the process state. You can  
16 modify the image zoom by pressing control and rotating the mouse wheel at same  
17 time.

#### 18 - Visualizing Window

19 We use a 3d viewer to display our calculated results stored in the main window's  
20 table. When a row's checkbox is ticked, it will be plotted. To develop this window,  
21 we have used an open source library named Jzy3D (<http://www.jzy3d.org/>) that  
22 is able to generate different graphical representations. In particular, we make use  
23 of the 3d scatter plot class.

24 This window is displayed after clicking on the *visualize* button (located in the  
25 main window), even if your table is still empty. This window is composed of the  
26 scatter plot figure located on the left and a set of components to modify the  
27 appearance of this figure on the right. The plotted figure is delimited by a 3D box  
28 with 3 axes: Percentage of hexagons, GDDH and GDDRV by default. These 3  
29 axes can be replaced by any of the following configurations ( $X - Y - Z$  axes)  
30 using the drop-down list with the label *Axes of figure* (upper right corner of the  
31 window):

1 1- GDDH-GDDRV-Percentage of hexagons (default)

2 2- GDDH-GDDRV-GDDV5

3 3- GDDH-GDDV5-Percentage of hexagons

4 4- GDDRV-GDDV5-Percentage of hexagons

5 The Percentage of hexagons axis encapsulate values between 0 – 100, and the  
6 others between 0 – 1. These limits can be modified for zooming in on the  
7 individual axes. We used three *rangeSliders* to select the range for each axis to  
8 be represented due to the limitations of the Jzy3D library. This library only  
9 provides you the possibility of zooming the Z axis turning the mouse wheel. You  
10 can visualize the three *rangeSliders* (one per axis) just below the *Axes of figure*  
11 drop-down list.

12 By default, the scatter plot displays the CVTn path, shown as individual dots:  
13 The darkest dot represents the average of 20 Voronoi diagrams 1 in CVTn and  
14 the lightest one is the average of 20 Voronoi diagrams 700 in CVTn. You have  
15 the option to disable the visualization of these references clicking on the  
16 checkbox ‘Show reference’ (just below *rangeSliders*), to only display calculated  
17 data. One can also adjust the size of the dots by modifying the position of the  
18 slider bar, located just below the previously mentioned checkbox. To select the  
19 different modes in which graphlet data of the CVTn reference can be calculated,  
20 a drop-down list can be deployed by clicking on the label *Motifs of CVTn*  
21 *reference*. This list allows you to represent the CVTn path depending on the  
22 method with which the graphlets were calculated: Mo29, Mo17 (by default), Mo10  
23 and Mo7.

24 The dots shown in the figure in the Main Window can be modified by changing  
25 the colour box in the Main Window’s table. In addition, a .png figure screenshot  
26 can be saved, by pressing the *Export view* button. For more detail, different  
27 angles and modes of visualization are available. By clicking the figure and moving  
28 the mouse, one can change the viewing angle, while double clicking on the figure  
29 will automatically perform a 360 degrees’ rotation.

### 30 **Functionalities.**

31 Along the program execution pipeline, there is the opportunity to develop a set  
32 of functionalities:



1    - Label image

2    Once you have selected an image to process, this image is binarized and the  
3    background is analysed to detect the cells and their outlines. If the number of  
4    white pixels is higher than black pixels, white pixels will be considered as cell's  
5    body, and vice versa. After that, each cell's body region of the image is assigned  
6    with a unique label. Thanks to the extensible architecture of FIJI, in which you  
7    can install plugins to add additional functionalities, this process of labelling  
8    regions is made using MorphoLibJ functionalities. Specifically, we have used the  
9    connected component labelling, which transforms a binary image into a labelled  
10   one by assigning a specific number to each connected component.

11   - Create ROI

12   Though it is possible to analyse the entire image, you can also process a smaller  
13   region of interest (ROI). Through FIJI's Roi Manager we can manage the ROIs,  
14   saving and performing operations on one at a time. We have selected two default  
15   operations within EpiGraph: rectangle (or any available shape) and multipoint  
16   selection. The former creates a rectangle selection (by default) and defines all  
17   the cells that fall inside it as valid cells. The latter enables the multipoint function  
18   with which it is possible to select individual cells. However, it is also possible to  
19   change these default forms of selection, by going straight to FIJI's main window  
20   and picking any from the toolbar.

21   - Select invalid regions

22   As your image may contain artefacts in the form of false valid cells, we have  
23   made it possible to mark these zones as invalid regions. All valid cells  
24   surrounding the mentioned invalid region will be considered as "non-valid cells".  
25   It is possible to select several areas of the image using the multipoint tool, to  
26   convert them to invalid sections. To validate this action, the selected invalid  
27   region should have the same colour as the cells' background.

28   - Testing neighbours

29   As mentioned the previous section, EpiGraph is able to calculate the polygon  
30   distribution using 2 essential parameters: a given pixel radius and an element  
31   shape. The element shape expands to a given radius of the cells of interest,  
32   looking for cells neighbouring. To ensure that the neighbourhood is correctly

1 captured, we allow the users to verify if the image has the right parameters by  
2 themselves. The polygon distribution of the image will appear with numbers at  
3 the left side of the window and each cell will also be painted with a colour  
4 representing its number of sides. Additionally, non-valid cells are coloured dark  
5 grey (almost black). Depending on the method chose to calculate graphlets  
6 (Mo29 or Mo17 considering 5' valid cells; Mo10 or Mo7 considering 4' valid cells),  
7 the zone coloured with bright colours will be established only by a group of central  
8 cells. In the same way, when we select a ROI, the cells affecting the cells within  
9 the ROI will be represented in pale colours. Furthermore, due to the variant  
10 number of 4' and 5' valid cells that are going to be filling the ROI, you may  
11 encounter when a series of particularities:

- 12 ○ Some cells of your defined ROI could not be final valid cells (4' or 5'). If  
13 the ROI is not surrounded by a minimum of 4 cells in all directions, the  
14 number of 5' valid cells is going to be lower than the number of 4' valid  
15 cells. Thus, if you select Mo17 or Mo29, some cells will not be 5' valid  
16 cells and will not be used in the final graphlet computation as principal  
17 nodes.
- 18 ○ An empty ROI. If you select a region with no 4' or 5' valid cell, you will  
19 obtain an empty neighbourhood.
- 20 ○ The pale coloured cells affecting the 4' or 5' valid cells will differ, when  
21 switching from Mo17 to Mo7 (for example). Therefore, a different number  
22 of cells will be affecting the bright coloured cells.

23 Finally, the calculations for neighbourhood will be exploited by *calculate*  
24 *graphlets* module, if parameters are not modified since this step.

#### 25 - Calculate graphlets

26 The main function of EpiGraph is the graphlet comparison. It begins by checking  
27 if there are any selected cells or ROIs. Then, in case any configuration has  
28 changed, we re-compute the neighbourhood, otherwise we take the information  
29 from a previous computation. From this neighbourhood and valid cells, it  
30 calculates the graphlets for the involved network of neighbours. As mentioned in  
31 previous sections, it would be incoherent not to filter the graphlets, so we refine

1 it by adding only the nodes at a fixed distance from the border nodes to the final  
2 graphlets. We first calculate the total set of graphlets for valid cells and then select  
3 a filter that depends on the chosen type of Graphlets to be implicated: Mo29 (26  
4 graphlets), Mo17 (17 graphlets), Mo10 (9 graphlets) and Mo7 (7 graphlets). The  
5 involved orbit nodes for graphlet calculations will be referred as 4' and 5' valid  
6 cells. When we have the final graphlets, we calculate the three distances (GDDH,  
7 GDDRV and GDDV5). Depending on the number of graphlets selected, a variable  
8 number of orbits are used in the comparison. Finally, the results will be added  
9 automatically to the table on Main Window.

#### 10 - Statistical analysis

11 Once all GDD data from an input image have been calculated, a statistical  
12 analysis is carried out to check if the GDD values of a certain image matches with  
13 the CVTn scale or if the image is out of the CVTn path in terms of organization.  
14 First, the closest CVTn diagram to the image is computed, estimating the  
15 Euclidean distance by considering 3 dimensions: GDDH, GDDRV and GDDV5.  
16 Thereafter, it is checked whether the image could belong to the closest diagram  
17 CVTn point cloud. At this point, the method generates a confidence score for the  
18 comparison to the CVTn (see **Experimental procedures, statistical analysis**).  
19 The closest diagram and the confidence score are computed and added to the  
20 main window table immediately upon calculating the GDD values or importing  
21 from an existing excel document. Alongside these two parameters, when  
22 exporting to an excel, the Euclidean distance to the closest diagram is also  
23 presented as a column.

#### 24 - Visualization

25 Visualizing results properly is a major feature and an important challenge to  
26 interpret results. Thus, we have embedded Jzy3d chart in a Java *JDialog* where  
27 you can visualize the calculated results' three coordinates (any combination of  
28 GDDH, GDDRV, GDDV5 and percentage of hexagons) as a point in a scatter  
29 plot. Once the points are represented you can compare them with our CVTn  
30 reference. At this point, you may want to change the illustrated CVTn selecting  
31 the number of graphlets used on the computations, although it is advisable to

1 compare images with the same configuration (Mo7, Mo10, Mo17 or Mo29).  
2 Additionally, it is possible to increase or decrease the size of the dots and zoom  
3 each axis manually. Finally, you can export the actual view of the chart to an  
4 image file.

## 5 **Dependencies.**

6 FIJI is designed to add functionalities via several routes, one of which is Plugin.  
7 In order to have simple control of dependencies and project settings, it uses  
8 Maven. Maven is a tool that is broadly used for supervising and building Java-  
9 based projects. It integrates several tools, such as Javadoc, to make all the  
10 programming steps easy. Dependencies are downloaded and updated when  
11 available. Furthermore, it helps you create the package with all your code and  
12 zips it in a .jar file that will be the Plugin format of FIJI. All this is achieved through  
13 its project object model (POM), which you can shape to your project adding  
14 mailing lists, issue tracking and more.

## 15 **Supported file formats.**

16 EpiGraph's input is an image. This image should be properly segmented and  
17 grey-scale, however, there are several options within EpiGraph to configure it  
18 depending on the type of the image. We allow images with different sizes of  
19 borders, since it is possible to increase the radius of the mask, changing the way  
20 in which the neighbourhood is built. However, it is mandatory that images are  
21 binary images (8 and 32 bits RGB images can be loaded, but they might not be  
22 correctly computed), where one colour is presented as the background, forming  
23 the body of cells, and the other the cells outline. Regarding the image file  
24 extensions, we entrust FIJI with the image opening and the supported files, so  
25 individual image file extensions allowed by FIJI would be supported in EpiGraph.  
26 We cannot admit any sequence of images and single images with high resolution  
27 due to problems with complexity in EpiGraph processing tasks. Accordingly, we  
28 limit the maximum of 3000px to either height or width of the image, to allow  
29 correct execution of the program.

## 30 **Quick step-by-step EpiGraph's usage.**

1 - Installation

2 *Through FIJI/ImageJ update site:*

3 The usual way to install a FIJI plugin is through his on-site updater. It's usually  
4 located on "*Help > Update FIJI*". Once it is open, you click on "*Manage updates*  
5 *sites*", look for EpiGraph and tick the checkbox next to it. Finally, "*Apply changes*"  
6 and you should have successfully installed this plugin. With this option, you can  
7 automatically get the latest version of EpiGraph.

8 *Manually:*

9 On the other hand, you may just want to download the .jar file from  
10 <https://tinyurl.com/EpiGraph-1-0-1> (or even generate your own .jar from source  
11 code) and install it manually. To do this, you can click either *Plugins>Install or*  
12 *Plugins>Install Plugin*. Then you select the provided .jar and you should be able  
13 to run EpiGraph.

14 - Simple example of a complete analysis

15 Calculate GDDH, GDDRV, GDDV5 and percentage of hexagons from a given  
16 image and visualize it in the 3D visualizer.

- 17 1. Select *open*.
  - 18 a. Select a supported image.
  - 19 b. If the image is supported, a window with the image will open.
- 20 2. Pick connectivity:
  - 21 a. Select the connectivity of your image. Usually 8-connectivity.
  - 22 b. Press *label*.
- 23 3. Default configuration:
  - 24 a. Radius of 3 pixels.
  - 25 b. Circle shape.
- 26 4. Calculate graphlets and statistics:
  - 27 a. Write a name for your image.
  - 28 b. Pick a colour for your image.
  - 29 c. Select *Mo29* in the combo box (*26 graphlets*).
  - 30 d. Press *calculate graphlets*. This will calculate GDDH, GDDRV and  
31 GDDV5.

1 e. When GDDs have been calculated, a statistical analysis is carried  
2 out providing a confidence score and the closest CVTn diagram to  
3 the image. Once it is finished, if the name box is not empty, all data  
4 will be automatically added to the main window table.

5

6 5. Export graphlets data:

7 a. Press the *Export graphlets data* button.

8 b. EpiGraph create a zip folder containing several files; an image with  
9 all the cells labelled with their corresponding identifier, another  
10 image representing the polygon distribution and, finally, a '.csv' file  
11 with the graphlets for all the valid cells.

12 6. Visualize your results:

13 a. Return to the main window.

14 b. Click on *visualize*.

15 7. Export view:

16 a. Staying in the visualizing window, you have the option of exporting  
17 the actual view into a '.png' file at every stage.

18 b. Press *export view*.

19 Congratulations! You have done the complete pipeline. Now, check where your  
20 image is in regard to the CVTn scale. You should analyse whether or not your  
21 image is near the CVTn (reference), which can be done using its closest diagram  
22 and confidence score from the table.

### 23 - Create region of interest

24 If you wish to test a sub-region of your images, you can create a region of  
25 interest (ROI). We have already opened an image and labelled it within EpiGraph.

26 1. In the image processing window:

27 a. Press *Create ROI*.

28 b. The default ROI is square shaped; however, you may want to test  
29 another shape. You can now return to the FIJI application and  
30 select any of the existing ones on the toolbar.

31 c. Click *done*. Your ROI is managed and stored in FIJI Roi Manager.

1 You have created your ROI; however, you cannot see how it affects the image  
2 yet.

3 2. Press *Testing neighbours*:

4 a. An image representing each cell by its number of neighbours  
5 will appear as an overlay in your image. Remember that the valid  
6 cells in the ROI, which appear with intense colour, are the 4' or 5'  
7 valid cells (depending on your graphlet selection), and the pale  
8 colours represent the rest of valid cells that affect the computation  
9 of graphlets. The result will be represented in the polygon  
10 distribution legend.

11

12 Once this procedure has been accomplished, you can continue the execution in  
13 the same way as before: graphlet calculation and statistics, export of results and  
14 visualization.

15 - Combine ROIs

16 As regions of interest are managed by the ROI manager you can add several  
17 ROIs to the image. You have already opened the image and properly labelled it.

18 1. Press *Create Roi*:

19 a. Select a left-hand region with the rectangular ROI shape. You  
20 should not select any of the cells on the right-hand side yet.

21 b. *Done*.

22 2. Select individual cells:

23 a. Click *Select cells*.

24 b. Pick only cells on the right-hand side of the image.

25 3. Test your setup:

26 a. You should be able to see the cells that fall into both ROIs.

27 b. Press *test neighbours*.

28 4. Oh! You realize you have made a mistake:

29 a. You do not want the first ROI.

30 b. Go to the ROI manager.

31 c. Select the first ROI and click Delete.

32 5. Test the new selection:

- 1           a. You will now represent only the existing ROI on the right.
- 2           b. Click *test neighbours* again.
- 3       If you create some ROIs, the selected cells will be all the cells that fall into any
- 4       of the ROIs. The logical operation would be an OR, so ROIs could be
- 5       disconnected.
- 6       - Selection of the number of motifs
- 7       There are 4 possible configurations. In this example we will create an analysis
- 8       with Mo29 using 26 graphlets.
- 9       1. Open an image representing cells with 4-connectivity and borders with 1-
- 10       pixel width.
- 11       2. Label it:
- 12           a. Click *label*. A warning notice advises that there are very few cells in
- 13           the image. Your full image is tagged with the same label because
- 14           all the cells are connected.
- 15           b. Select now 4-connectivity.
- 16           c. Click *label*. That works as expected! Each cell has a different tag.
- 17       3. Test neighbours by default.
- 18       4. Mo29:
- 19           a. This configuration has the maximum number of graphlets present
- 20           in our study.
- 21           b. Change the combo box to *Mo29 (26 graphlets)*.
- 22       5. Calculate graphlets:
- 23           a. Add a proper name to your image.
- 24           b. Press calculate graphlets to add the full results to the table.
- 25       6. Visualizing:
- 26           a. Change the colour of your row to a pink-ish colour. This will let you
- 27           differentiate your data from the reference, which is black, grey and
- 28           almost white.
- 29           b. Click on *Visualize*.
- 30           c. As a default, your reference is *Mo17 (17 graphlets)*. So, change this
- 31           option in the combo box to *Mo29 (26 graphlets)*.
- 32           d. Modify the axes of figure to 'GDDH-GDDRV-GDDV5'.



1 e. Change the range sliders at your right side to get an adjusted  
2 visualization per axis.

3 You will see that the reference has changed regarding the default Mo17(17  
4 graphlets) reference. Your image is probably aligned to the CVTn reference. This  
5 is because your image is within the CVTn path, otherwise the image organization  
6 would be different to our model of reference. You can verify this with the  
7 confidence score, which also provides the closest diagram to the input image.

8 - Increase the radius of neighbourhood.

9 You have a segmented image with a border wide of 3 pixels, and you want to  
10 capture the real number of neighbouring of each cell. You have already opened  
11 the image and properly labelled it.

12 1. Test if neighbours are correct:

13 a. Since you do not know which pixel radius you should select, test  
14 various shapes and radii in order to see if the cells with 6  
15 neighbours are actual 6-sided cells.

16 b. Change parameters and click on *test neighbours* to make sure the  
17 neighbourhood is correct.

18 Once your polygon distribution is correct enough, you can follow the next step  
19 of the analysis protocol.

20

21 - Import/export table

22 You may want to save your results and to do this you can export your results to  
23 an excel file, simply by pressing the button export in the main window.

24 On the other hand, if you would like to continue your session right where you  
25 left off, you could import your exported excel file to the table and carry on with  
26 your analysis. You can add as many .xls files to the table as you want and we  
27 allow duplicates. If you want to remove them, just tick them at the *Select all*  
28 column and click on *Delete rows*.

29 Another option is to calculate the mean values of a particular set of images  
30 outside EpiGraph. To do this, import the excel with the mean values. EpiGraph

1 will automatically calculate all the values of the closest diagram and its associated  
2 confidence score, enabling you to improve your analysis on that dataset.

3

#### 4 Troubleshooting

5 If the visualization is not working properly, you may need to update FIJI after  
6 the installation.

7 If you find something is not working with any functionality of the application, you  
8 can send an e-mail to [pvicente1@us.es](mailto:pvicente1@us.es) or [pgomez-ibis@us.es](mailto:pgomez-ibis@us.es). Reporting bugs  
9 can also be done through Github  
10 <https://github.com/ComplexOrganizationOfLivingMatter/Epigraph/issues>. Known  
11 issues are held at the same page.

12

#### 13 **License Information.**

14 To encourage the sharing of resources, EpiGraph is published under an  
15 open-source (GPLv3) license, which can be downloaded from  
16 <https://github.com/ComplexOrganizationOfLivingMatter/Epigraph/blob/master/LI>  
17 CENSE.

18

19

1 **SUPPLEMENTAL FIGURES**

2

3 **Figure S1. Graphlets and orbits configuration.** Illustration of graphlets  
4 networks used in (Pržulj, 2007). Each graphlet configuration is labelled with  $G_n$ ,  
5 in which, 'n' is the graphlets number (from  $G_0$  to  $G_{29}$ ). These labels match with  
6 the cellular motifs in (**Fig. 1**). Each vertex represents a cell and each edge the  
7 connection between two cells. Therefore, the graphs represent the connectivity  
8 network for each matched cellular motif. The three graphlets labelled in red ( $G_{20}$ ,  
9  $G_{22}$  and  $G_{25}$ ) are the ones discarded in our work. The digits (from 0 to 72) at some  
10 mauve vertices indicate the orbits number counted for the GDD calculation.

11

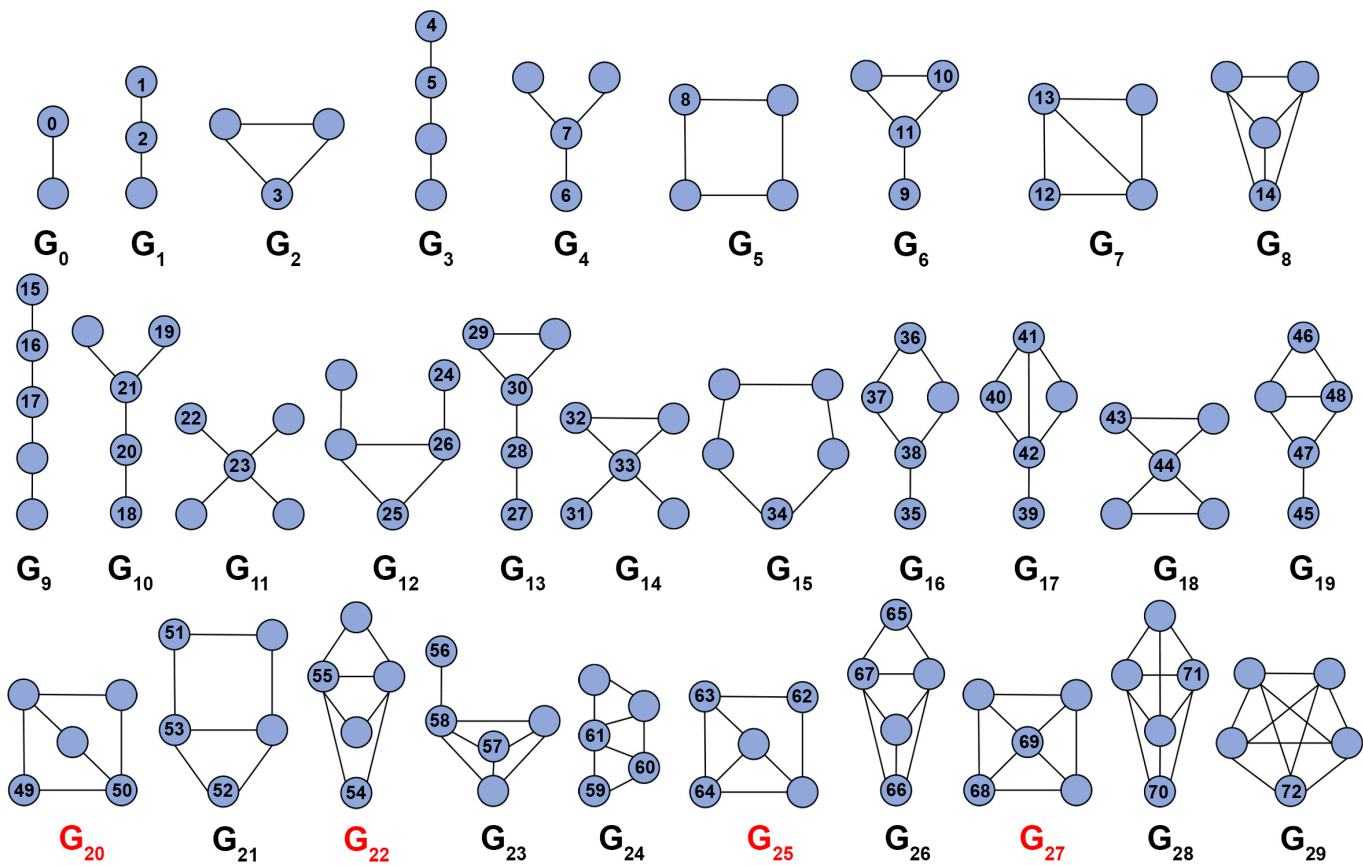

1 **Figure S2. Pipeline for the Graphlet degree Distribution agreement Distance**  
2 **(GDD) calculation.** Scheme representing the protocol sequence to calculate the  
3 GDD between two segmented images: Eye and Diagram 1. First, a network of  
4 cell-to-cell contacts is computed defining the centroids of valid cells as nodes and  
5 its connections with neighbouring cells as edges. The nodes are represented with  
6 the same colour code as in **Fig. 2**. Second, the graphlets are extracted from the  
7 network. This enables the calculation of an index of the distribution of every  
8 graphlet. Finally, a comparison between the two Graphlet degree Distributions is  
9 performed to obtain the GDD value.  
10

SEGMENTED  
IMAGE

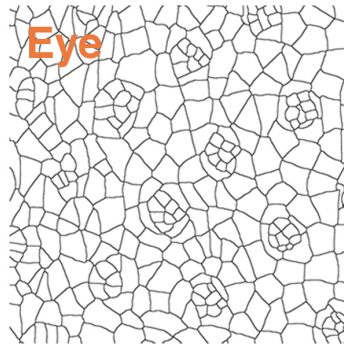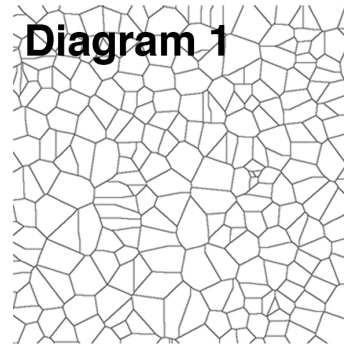

CELL-TO-CELL  
NETWORK

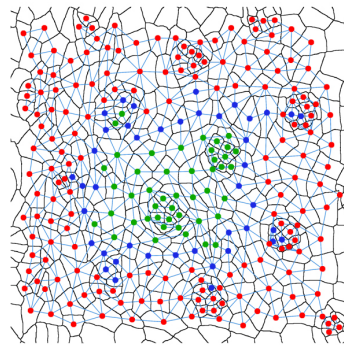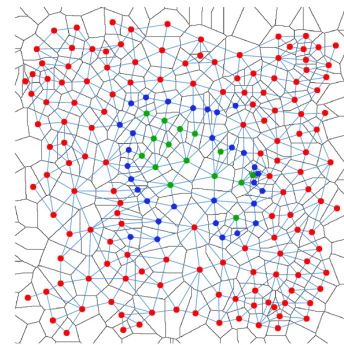

GRAPHLETS  
EXTRACTION

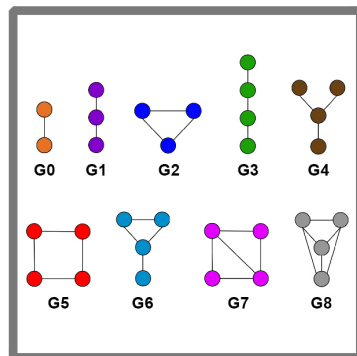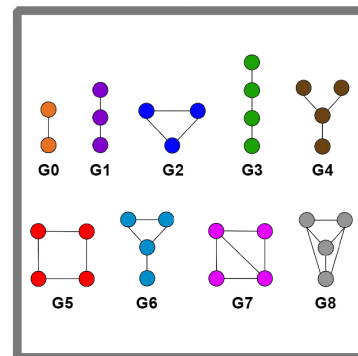

GRAPHLETS  
DEGREE  
DISTRIBUTION

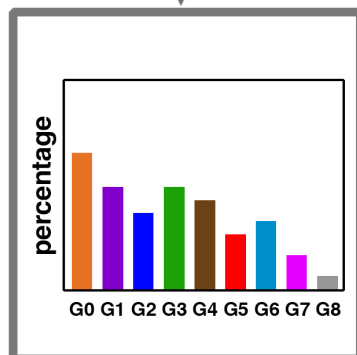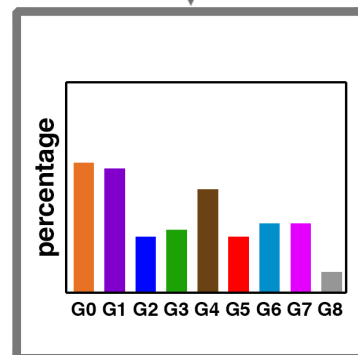

Graphlet degree  
Distribution  
agreement Distance

1 **Figure S3. Comparisons between epithelia and CVTn path.** 5-dimensional  
2 scatter plot representing every possible comparison between GDDH, GDDRV,  
3 GDDV5, percentage of hexagons and shape index. The X and Y axes for each  
4 chart correspond to its column and row names respectively. The CVTn path is  
5 shown starting at diagram 1 until diagram 100 (from 1 to 20, from 30 to 100 by  
6 steps of 10), and they are represented in greyscale beginning in black and  
7 reducing its darkness with the increase of the diagrams. A set of natural epithelia  
8 are display: cNT (16 samples, light blue), dWL (15 samples, green), dWP (16  
9 samples, red), Eye (3 samples, orange) and dMWP (3 samples, violet). The mean  
10 value is represented as a circle and their individual values as smaller  
11 circumferences. In the shape index column, values up to 3.81 represent solid  
12 tissues, painted in orange; shape index values greater than 3.81 indicate fluid  
13 tissues, in green. The histograms represent the dots density along each column  
14 of comparisons. These graphs complement **Fig. 2**.  
15  
16

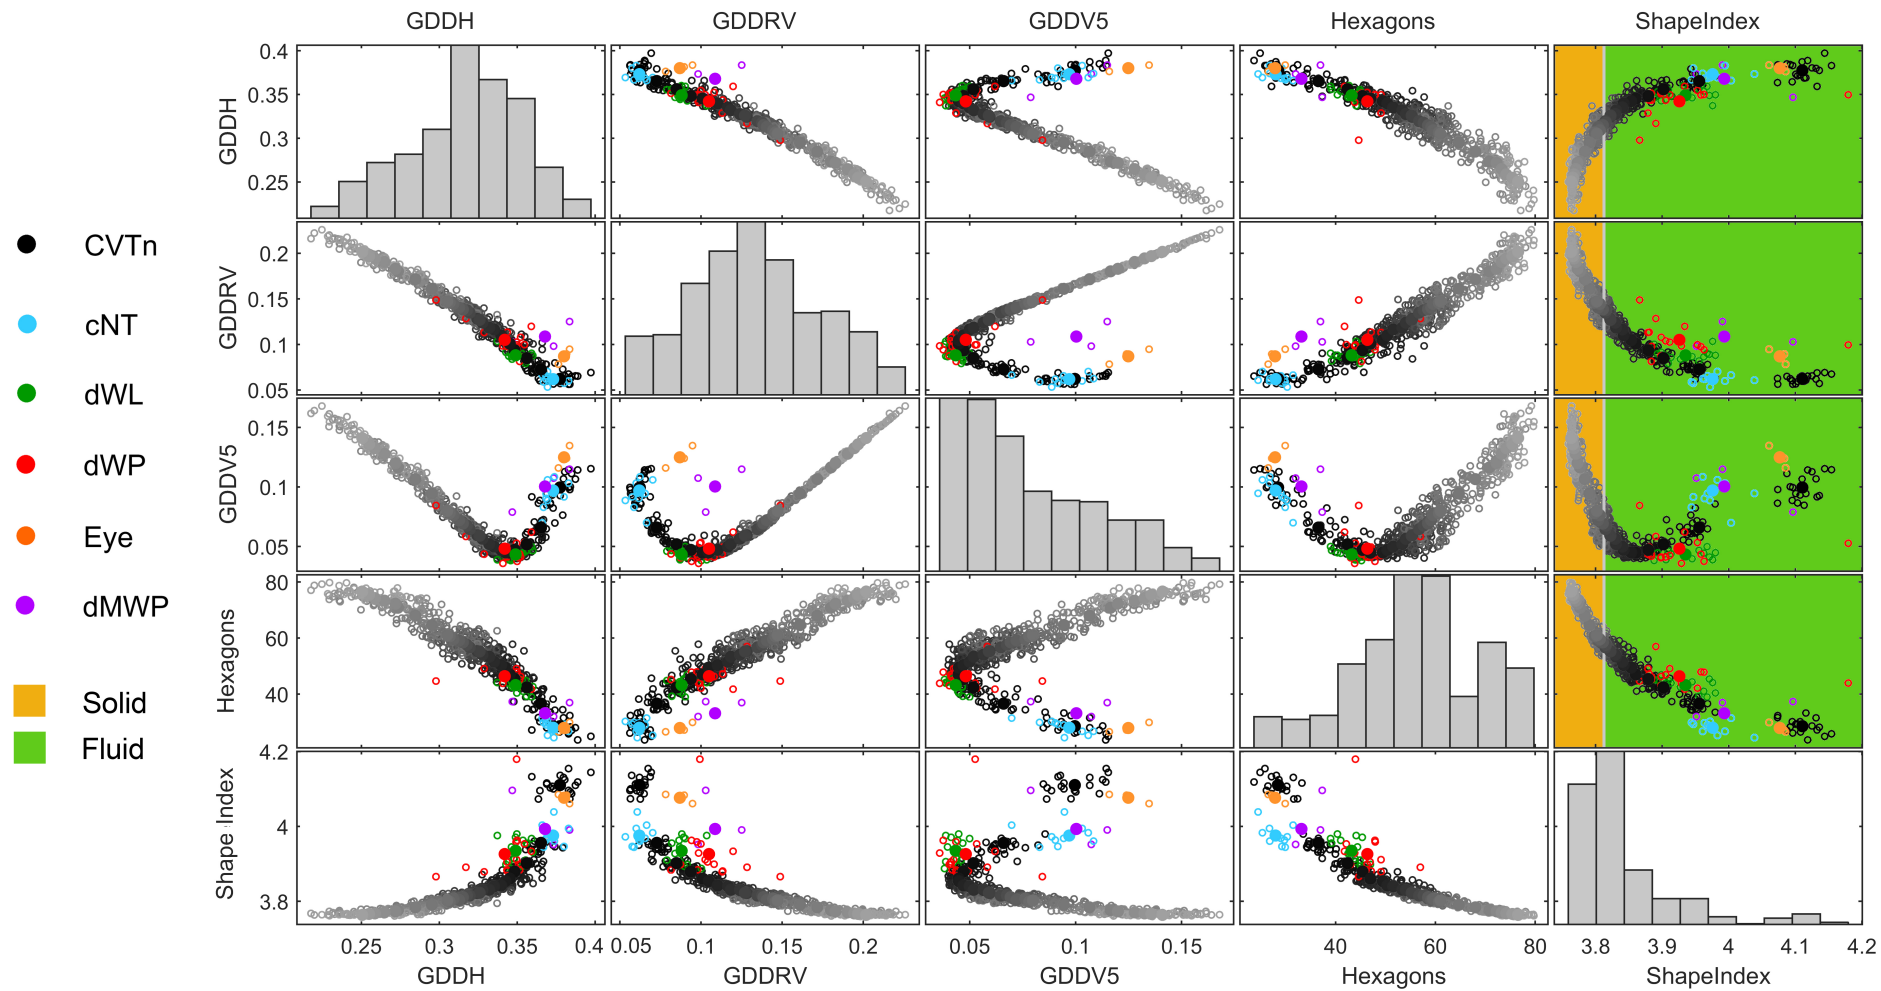



1 **Figure S4. Comparisons of the different simulations regarding the CVTn**  
2 **and natural tissues.** All the possible combinations from GDDH, GDDRV,  
3 GDDV5, percentage of hexagons and shape index in 2-dimensional graphics.  
4 The CVTn path is shown starting at the diagram 1 until the diagram 100 (from 1  
5 to 20, from 30 to 100 by steps of 10). The average values of 20 replications per  
6 diagram, are represented as greyscale dots beginning in black and reducing its  
7 darkness with the increase of the diagrams. Images from biological samples are  
8 marked as dots representing their mean: cNT (16 samples, light blue), dWL (15  
9 samples, green), dWP (16 samples, red), Eye (3 samples, orange) and dMWP (3  
10 samples, violet); Simulations are represented with their mean (circle) and their  
11 individual values (circumference): Proliferative Control (20 replicates, carnation  
12 pink), Case III (17 replicates, hot pink) and Case IV (15 replicates, purple); Non-  
13 proliferative control (20 replicates, blue bell), Squared (20 replicates, azure blue)  
14 and Elongated simulations (20 replicates, Cornflower Blue). In the shape index  
15 column, values up to 3.81 represent solid tissues, painted in orange; shape index  
16 values greater than 3.81 stand for fluid tissues, in green. The histograms  
17 represent the dots density along each column of comparisons. These graphs  
18 complement **Fig. 3**.  
19

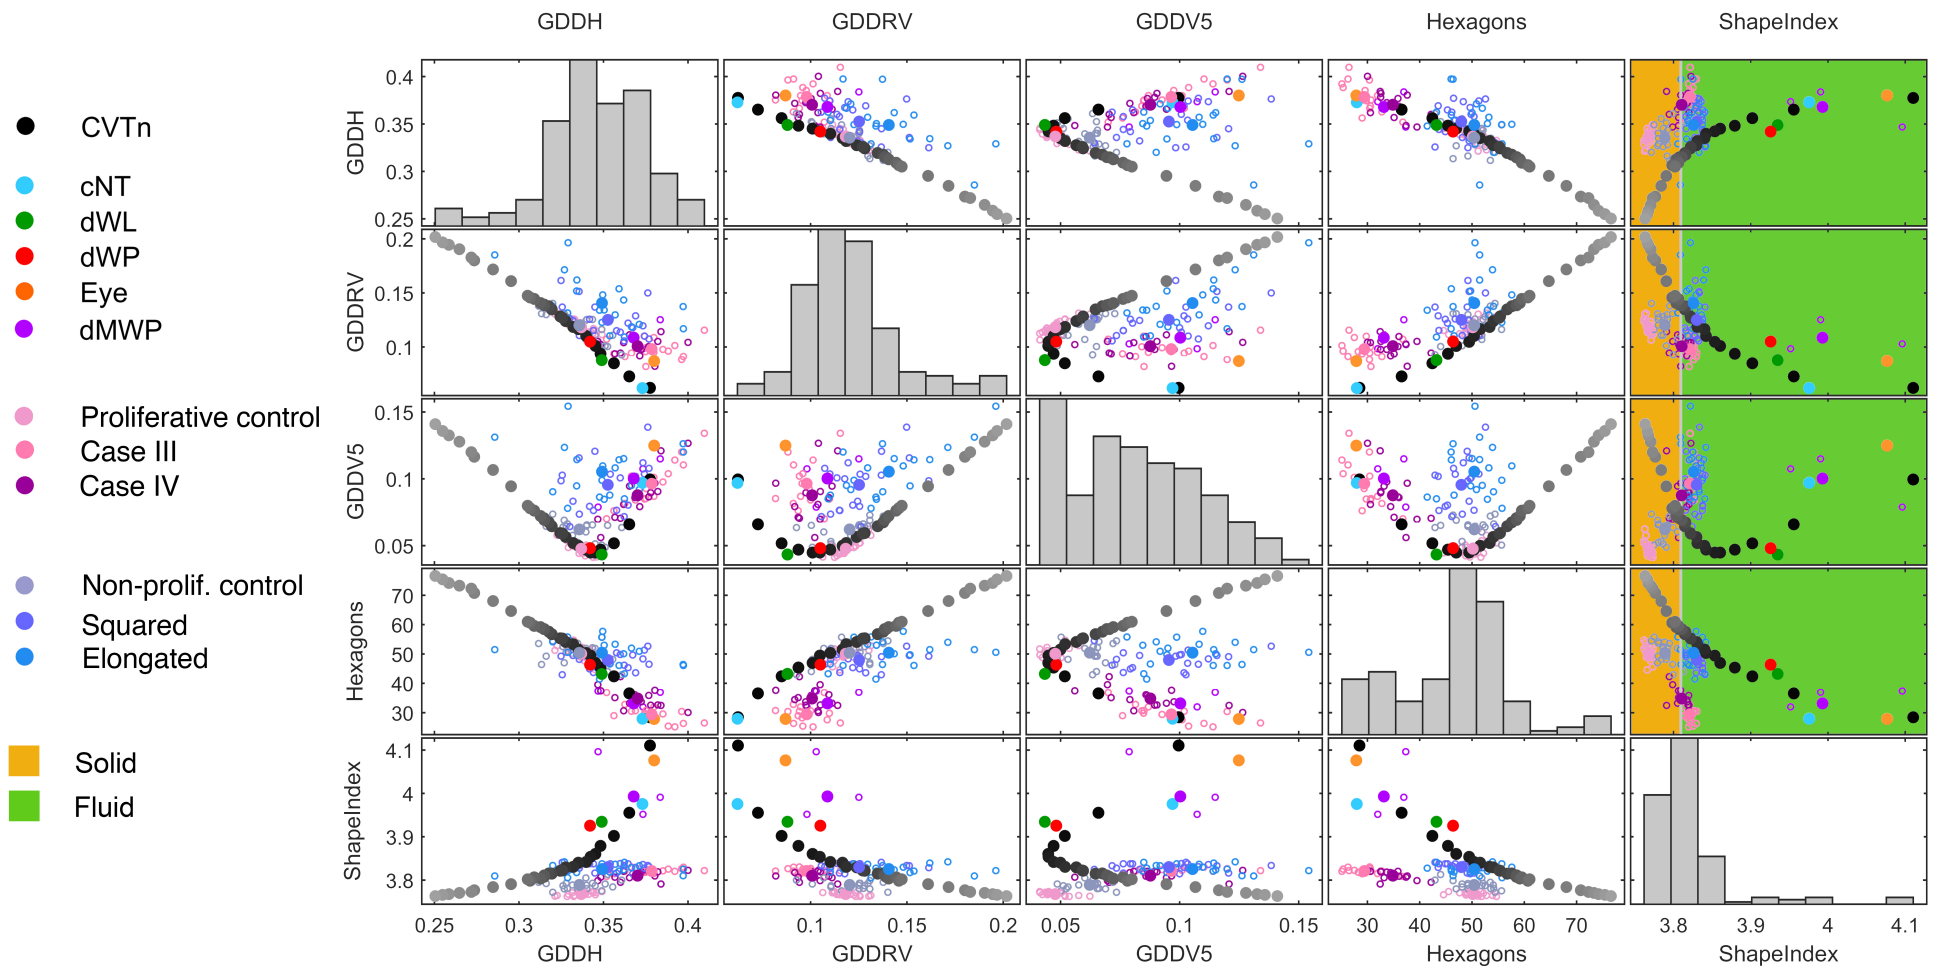

1 **Figure S5. Shape index values for the analysed images.** Plot with shape index  
2 and GDDRV as axes. The orange region represents the shape index values that  
3 define a tissue as 'solid', and the green zone as 'fluid'. Circles are the average  
4 value obtained from the individual samples from the natural images: Eye, cNT,  
5 dWL, dWP and dMWP; CVTn (from diagram 1 to 100), Proliferative Control, Case  
6 III and Case IV; Non-proliferative control, Squared and Elongated simulations.  
7 Triangles stand for the average value from solid/fluid tissues: WT, (blue) and  
8 *Mbs-RNAi* (orange).  
9

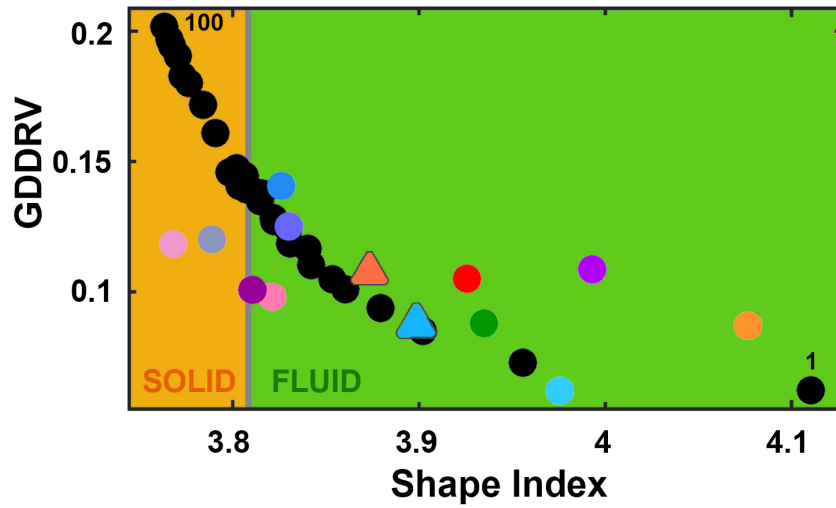

- |        |                         |                   |
|--------|-------------------------|-------------------|
| ● CVTn | ● Proliferative control | ▲ WT wing         |
| ● cNT  | ● Case III              | ▲ <i>Mbs-RNAi</i> |
| ● dWL  | ● Case IV               |                   |
| ● dWP  | ● Non-prolif. control   |                   |
| ● Eye  | ● Squared               | ■ Solid           |
| ● dMWP | ● Elongated             | ■ Fluid           |

1 **LEGENDS OF SUPPLEMENTAL FILES**

2 **Movie S1. A general example of the usage of EpiGraph.** The movie shows all  
3 the functionalities of EpiGraph and how to use them, in general terms.

4  
5 **Table S1. GDD values between pairs of images from images of biological**  
6 **samples and Voronoi Diagrams.** Graphlet degree Distribution agreement  
7 Distance mean between each row and column is shown. Data is divided by the  
8 used cellular motifs (Mo17 and Mo29). The used samples are Voronoi 1, 4 and  
9 5: 20 replicates; dWP: 16 replicates; dWL: 15 replicates; Eye: 3 replicates.

10

11 **Table S2. GDDs and percentage of hexagons of CVTn reference using all**  
12 **the cellular motifs sets.** Data are distributed depending on the cellular motifs  
13 used (Mo7, Mo10, Mo17, Mo29). Mean and standard deviation of percentage of  
14 hexagons, GDDH, GDDRV and GDDV5 are shown, along with their associated  
15 diagram. 20 replicates of each diagram are represented.

16

17 **Table S3. Outlier detection results of natural images, simulations, rosettes**  
18 **and rigid/soft tissues.** For the mean of each set of images, the closest diagram  
19 and confidence score are calculated (see Experimental Procedures, statistical  
20 analysis). In green, the confidence score above 0.95 corresponding to inliers. In  
21 red are marked the confidence scores below 0.95, which corresponds to outliers.

22

23 **Table S4. Measurements of fluidity from simulations and actual epithelia**  
24 **using the shape index.** The shape index of all the tessellations used along the  
25 manuscript have been calculated in terms of the average of its median and mean  
26 values for each sample. The green colour is referred to a tissue with a shape  
27 index defined as fluid, and the orange colour is identified as solid.

28

29 **REFERENCES**

30 Legland, D., Arganda-Carreras, I., Andrey, P., 2016. MorphoLibJ: integrated  
31 library and plugins for mathematical morphology with ImageJ. *Bioinformatics* 32,  
32 btw413. doi:10.1093/bioinformatics/btw413

33 Pržulj, N., 2007. Biological network comparison using graphlet degree

1 distribution. *Bioinformatics* 23, 177–183. doi:10.1093/bioinformatics/btl301  
2 Schindelin, J., Arganda-Carreras, I., Frise, E., Kaynig, V., Longair, M., Pietzsch,  
3 T., Preibisch, S., Rueden, C., Saalfeld, S., Schmid, B., Tinevez, J.-Y., White, D.J.,  
4 Hartenstein, V., Eliceiri, K., Tomancak, P., Cardona, A., 2012. Fiji: an open-  
5 source platform for biological-image analysis. *Nat. Methods* 9, 676–682.  
6 doi:10.1038/nmeth.2019  
7 Schindelin, J., Rueden, C.T., Hiner, M.C., Eliceiri, K.W., 2015. The ImageJ  
8 ecosystem: An open platform for biomedical image analysis. *Mol. Reprod. Dev.*  
9 82, 518–529. doi:10.1002/mrd.22489  
10 Yaveroğlu, Ö.N., Malod-Dognin, N., Davis, D., Levnajic, Z., Janjic, V.,  
11 Karapandza, R., Stojmirovic, A., Pržulj, N., 2014. Revealing the Hidden  
12 Language of Complex Networks. *Sci. Rep.* 4, 1–9. doi:10.1038/srep04547  
13
